# Supplementary material for: Mechanism and origins of ligand-controlled regioselectivity of copper-catalyzed borocarbonylation of imines with B2pin2 and alkyl iodides: a computational study
Source: Royal Society of Chemistry journal article supplement (doi:10.1039/d3qo00093a), 2023-01-01
Supplement: d3qo00093a1.pdf [file d3qo00093a1.pdf]

*Supporting Information*

**Mechanism and Origins of Ligand-controlled  
Regioselectivity of Copper-Catalyzed Borocarbonylation of  
Imines with B<sub>2</sub>pin<sub>2</sub> and Alkyl Iodides: A Computational  
Study**

Xinyi Song, Hongli Wu, Jinjin Yang, Wentao Zhao\*, Genping Huang\*

Department of Chemistry, School of Science and Tianjin Key Laboratory of  
Molecular Optoelectronic Sciences, Tianjin University, Tianjin 300072, P. R. China.

E-mail: wentao\_zhao@tju.edu.cn; gphuang@tju.edu.cn

**Table of Contents:**

|                                                                                             |     |
|---------------------------------------------------------------------------------------------|-----|
| 1. Other possibilities of the migratory insertion into the Cu-B bond -----                  | S2  |
| 2. The alternative pathways of the C-I bond cleavage -----                                  | S3  |
| 3. Formation of valeryl radical -----                                                       | S4  |
| 4. Possible pathways leading to acyl-copper(III) species -----                              | S5  |
| 5. Calculated overall energy profiles of the Cu <sup>Me</sup> IMes-catalyzed reaction ----- | S6  |
| 6. Visualization of QTAIM critical points for IM2 and IM15 -----                            | S7  |
| 7. Table of calculated energies and energy corrections -----                                | S8  |
| 8. Cartesian coordinates -----                                                              | S11 |

## 1. Other possibilities of the migratory insertion into the Cu-B bond

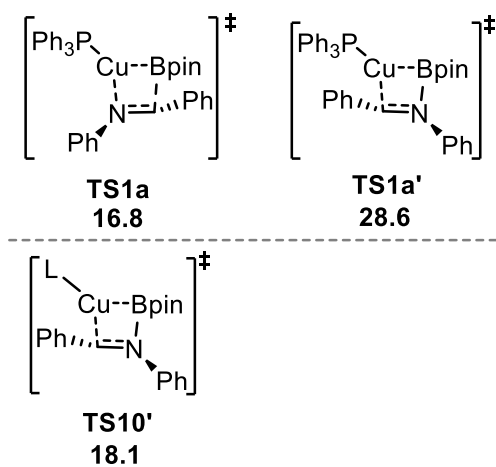

**Scheme S1.** Other possibilities of the migratory insertion into the Cu-B bond. The Gibbs free energies are given in kcal/mol.

## 2. The alternative pathways of the C-I bond cleavage

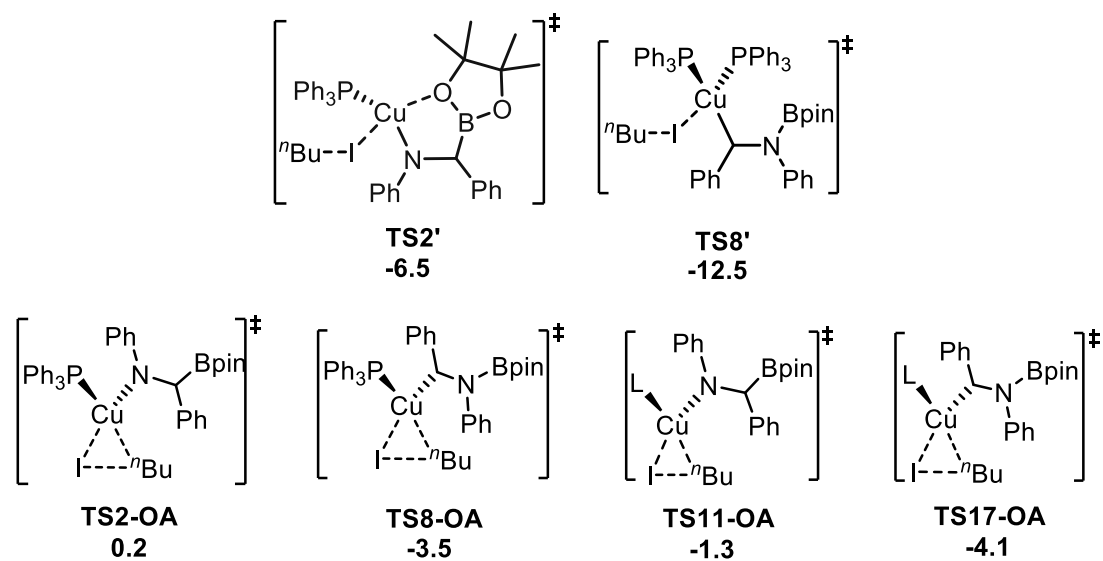

**Scheme S2.** The alternative pathways of the C-I bond cleavage. The Gibbs free energies are given in kcal/mol.



#### 4. Other possibilities for the formation of acyl-copper(III) species after halogen-atom abstraction

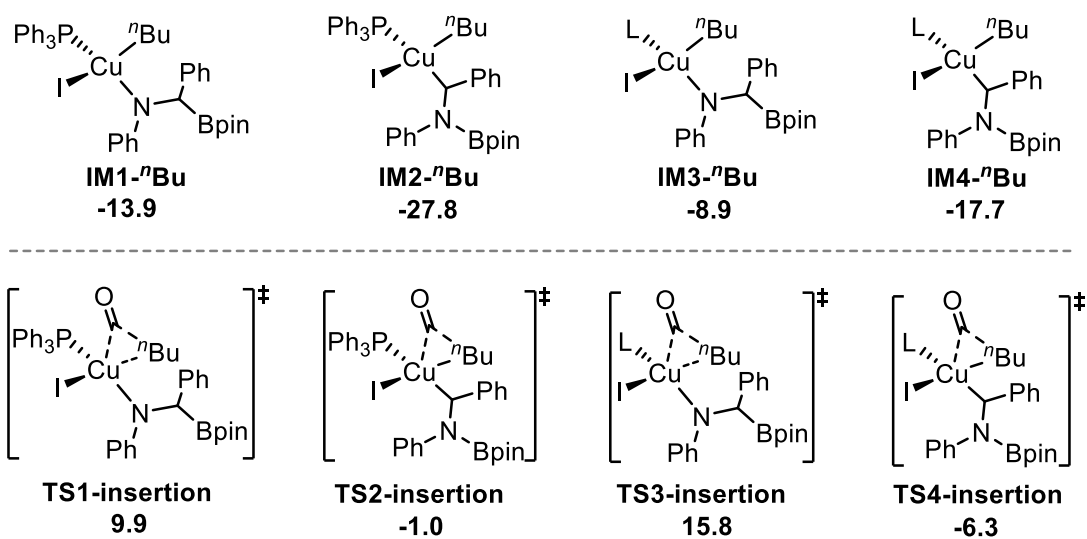

**Scheme S4.** Other possibilities for the formation of alkylacyl-copper(III) intermediates and amidoacyl-copper(III) intermediates after halogen-atom abstraction. The Gibbs free energies are given in kcal/mol.

## 5. Calculated overall energy profiles of the Cu/<sup>Me</sup>IMes-catalyzed reaction

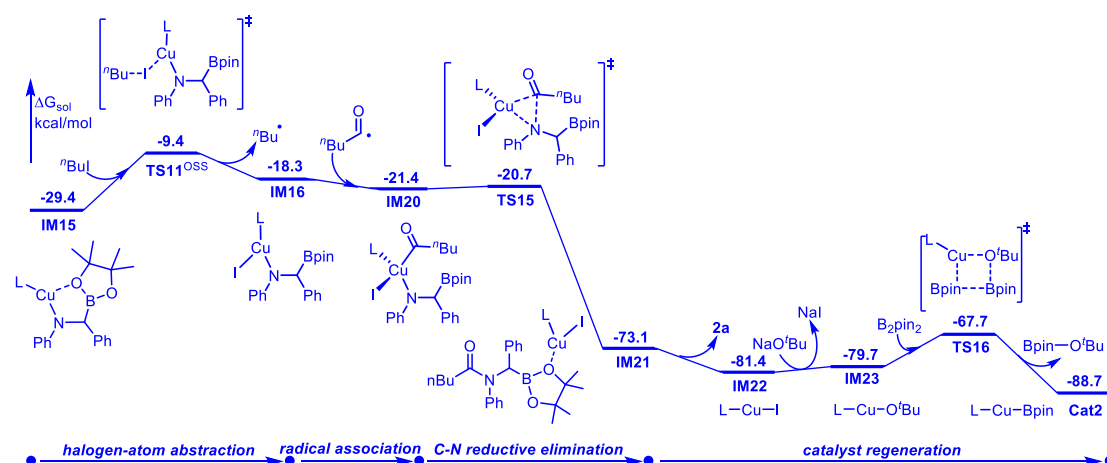

**Figure S1.** Calculated energy profile leading to  $\alpha$ -boryl amide **2a**. The Gibbs free energies are given in kcal/mol.

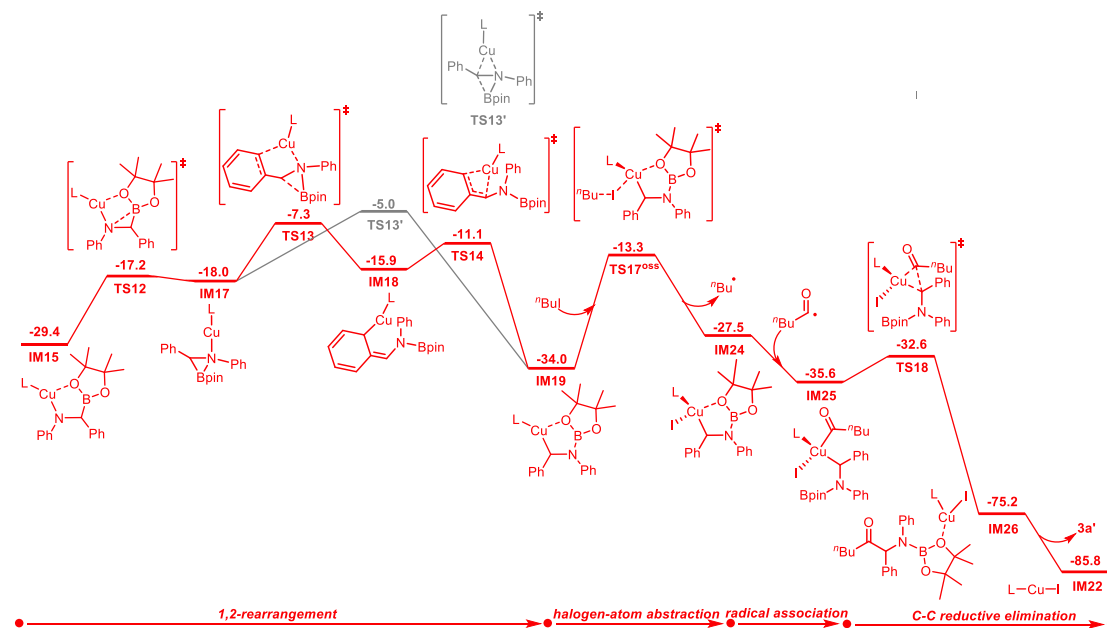

**Figure S2.** Calculated energy profile leading to  $\alpha$ -amino ketone **3a'**. The Gibbs free energies are given in kcal/mol.

## 6. Visualization of AIM critical points for IM2 and IM15

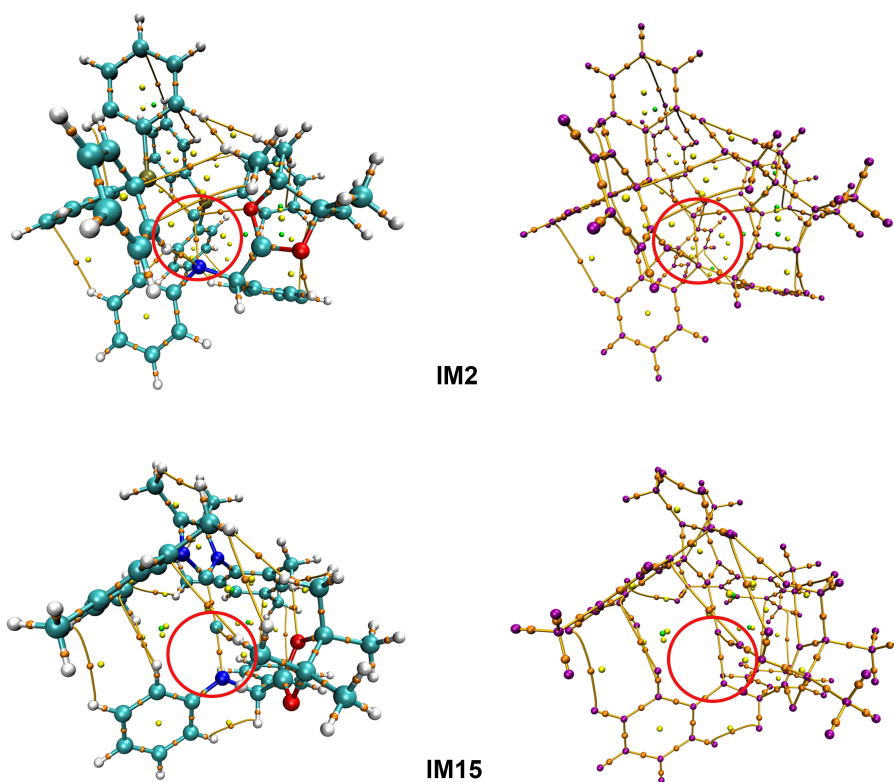

**Figure S3.** Visualization of QTAIM critical points for IM2 and IM15. Magenta corresponds to nuclear critical points (NCP), orange to bond critical points (BCP), yellow to ring critical points (RCP) and green to cage critical points (CCP). Yellow lines indicate bond path. The red circle identifies the relevant area about Cu-N bond.

## 7. Table of calculated energies and energy corrections

| <b>Stationary point</b>             | <b>Single-point energy-B3LYP-D3(BJ)-SMD 6-311+G(d,p)&amp;SDD (a.u.)</b> | <b>Thermal correction to Gibbs free energy at 298.15 K (a.u.)</b> |
|-------------------------------------|-------------------------------------------------------------------------|-------------------------------------------------------------------|
| <b>Cat1</b>                         | -2682.0603328                                                           | 0.650083                                                          |
| <b>1a</b>                           | -556.9589831                                                            | 0.165677                                                          |
| <b>CO</b>                           | -113.3452463                                                            | -0.014102                                                         |
| <b><sup>n</sup>BuI</b>              | -169.3421885                                                            | 0.090691                                                          |
| <b><sup>n</sup>Bu</b>               | -157.8500659                                                            | 0.088608                                                          |
| <b><sup>n</sup>BuCO</b>             | -271.2317246                                                            | 0.097381                                                          |
| <b>PPh<sub>3</sub></b>              | -1036.6016028                                                           | 0.228341                                                          |
| <b>NaO<sup>t</sup>Bu</b>            | -395.4954949                                                            | 0.091253                                                          |
| <b>NaI</b>                          | -173.8152557                                                            | -0.024046                                                         |
| <b>B<sub>2</sub>pin<sub>2</sub></b> | -822.8687219                                                            | 0.318391                                                          |
| <b>Bpin-O<sup>t</sup>Bu</b>         | -644.6602391                                                            | 0.269493                                                          |
| <b>2a</b>                           | -1239.7355704                                                           | 0.464218                                                          |
| <b>3a'</b>                          | -1239.7423895                                                           | 0.463815                                                          |
| <b>IM1</b>                          | -3239.052228                                                            | 0.844185                                                          |
| <b>TS1</b>                          | -3239.0372863                                                           | 0.849837                                                          |
| <b>TS1'</b>                         | -3239.0145525                                                           | 0.848249                                                          |
| <b>IM2</b>                          | -3239.0999892                                                           | 0.847783                                                          |
| <b>IM3</b>                          | -3239.1068859                                                           | 0.846143                                                          |
| <b>TS2<sup>OSS</sup></b>            | -3408.4169497                                                           | 0.952148                                                          |
| <b>IM4</b>                          | -3250.5638462                                                           | 0.843525                                                          |
| <b>IM5</b>                          | -2485.185968                                                            | 0.711588                                                          |
| <b>TS3</b>                          | -2485.1849436                                                           | 0.712398                                                          |
| <b>IM6</b>                          | -2485.2655189                                                           | 0.712247                                                          |
| <b>IM7</b>                          | -2282.1515955                                                           | 0.477766                                                          |
| <b>IM8</b>                          | -2503.8267035                                                           | 0.597359                                                          |
| <b>TS4</b>                          | -3326.7157711                                                           | 0.951704                                                          |
| <b>TS5</b>                          | -3239.0792095                                                           | 0.849007                                                          |
| <b>IM9</b>                          | -3239.0818259                                                           | 0.847877                                                          |
| <b>TS6</b>                          | -3239.0670363                                                           | 0.845314                                                          |
| <b>TS6'</b>                         | -3239.0609666                                                           | 0.845473                                                          |



|                                     |               |           |
|-------------------------------------|---------------|-----------|
| <b>IM10</b>                         | -3239.0847096 | 0.848747  |
| <b>TS7</b>                          | -3239.0800228 | 0.849600  |
| <b>TS8<sup>OSS</sup></b>            | -2371.8039963 | 0.696952  |
| <b>IM11</b>                         | -2213.9492671 | 0.584421  |
| <b>IM12</b>                         | -2485.2131899 | 0.711980  |
| <b>TS9</b>                          | -2485.210535  | 0.711731  |
| <b>IM13</b>                         | -2485.2703311 | 0.711659  |
| <b>Cat2</b>                         | -1612.0540123 | 0.564321  |
| <b>1a</b>                           | -556.9590114  | 0.165677  |
| <b>CO</b>                           | -113.3451074  | -0.014102 |
| <b><sup>n</sup>BuI</b>              | -169.3420306  | 0.090691  |
| <b><sup>n</sup>Bu</b>               | -157.8509179  | 0.088608  |
| <b><sup>n</sup>BuCO</b>             | -271.2309037  | 0.097381  |
| <b>NaO<sup>t</sup>Bu</b>            | -395.4895567  | 0.091253  |
| <b>NaI</b>                          | -173.8041159  | -0.024046 |
| <b>B<sub>2</sub>pin<sub>2</sub></b> | -822.8665074  | 0.318391  |
| <b>Bpin-O<sup>t</sup>Bu</b>         | -644.659438   | 0.269493  |
| <b>2a</b>                           | -1239.7348021 | 0.464218  |
| <b>3a'</b>                          | -1239.7414224 | 0.463815  |
| <b>IM14</b>                         | -2169.0381427 | 0.756897  |
| <b>TS10</b>                         | -2169.0205985 | 0.759739  |
| <b>IM15</b>                         | -2169.0862613 | 0.759458  |
| <b>TS11<sup>OSS</sup></b>           | -2338.4112677 | 0.868014  |
| <b>IM16</b>                         | -2180.5539236 | 0.755742  |
| <b>TS12</b>                         | -2169.0666866 | 0.759192  |
| <b>IM17</b>                         | -2169.0685027 | 0.759860  |
| <b>TS13</b>                         | -2169.0491593 | 0.757476  |
| <b>IM18</b>                         | -2169.0633085 | 0.757959  |
| <b>TS14</b>                         | -2169.0584847 | 0.760714  |
| <b>IM19</b>                         | -2169.0925192 | 0.758332  |
| <b>TS1a</b>                         | -2202.3906686 | 0.587225  |
| <b>TS1a'</b>                        | -2202.3699413 | 0.585167  |
| <b>TS10'</b>                        | -2169.0082997 | 0.757099  |
| <b>TS2'</b>                         | -2371.7867832 | 0.697717  |
| <b>TS8'</b>                         | -3408.4280661 | 0.959057  |
| <b>TS2-OA</b>                       | -2371.7802842 | 0.701897  |
| <b>TS8-OA</b>                       | -2371.7882687 | 0.703968  |

|                           |               |          |
|---------------------------|---------------|----------|
| <b>TS11-OA</b>            | -2338.4027484 | 0.872348 |
| <b>TS17-OA</b>            | -2338.411168  | 0.876264 |
| <b>IM1-"Bu</b>            | -2371.8058877 | 0.705020 |
| <b>IM2-"Bu</b>            | -2371.8275152 | 0.704369 |
| <b>IM3-"Bu</b>            | -2338.4186041 | 0.876024 |
| <b>IM4-"Bu</b>            | -2338.4354805 | 0.878928 |
| <b>TS1-insertion</b>      | -2485.1298246 | 0.707459 |
| <b>TS2-insertion</b>      | -2485.1501193 | 0.710411 |
| <b>TS3-insertion</b>      | -2451.7436936 | 0.881275 |
| <b>TS4-insertion</b>      | -2451.7805223 | 0.882882 |
| <b>IM20</b>               | -2451.8044018 | 0.882827 |
| <b>TS15</b>               | -2451.8044518 | 0.883930 |
| <b>IM21</b>               | -2451.8901908 | 0.886071 |
| <b>IM22</b>               | -1212.1380867 | 0.388357 |
| <b>IM23</b>               | -1433.8289949 | 0.511865 |
| <b>TS16</b>               | -2256.7064279 | 0.863357 |
| <b>TS13'</b>              | -2169.0438534 | 0.755864 |
| <b>TS17<sup>OSS</sup></b> | -2338.4216193 | 0.872015 |
| <b>IM24</b>               | -2180.5680898 | 0.755243 |
| <b>IM25</b>               | -2451.8303768 | 0.886016 |
| <b>TS18</b>               | -2451.8263261 | 0.886837 |
| <b>IM26</b>               | -2451.8910724 | 0.883687 |

## 8. Cartesian coordinates

### 1a

|   |             |             |             |
|---|-------------|-------------|-------------|
| C | -3.74897200 | -1.23233700 | 0.41018000  |
| C | -2.37300900 | -1.05049100 | 0.33715500  |
| C | -1.84553800 | 0.18223000  | -0.08396600 |
| C | -2.72192400 | 1.22207700  | -0.42683800 |
| C | -4.10168100 | 1.03857800  | -0.35106400 |
| C | -4.61716300 | -0.18901800 | 0.06733000  |
| H | -4.15177300 | -2.18737700 | 0.73555200  |
| H | -1.68221300 | -1.84503500 | 0.59851400  |
| H | -2.31514500 | 2.17637300  | -0.75330700 |
| H | -4.77261900 | 1.84995500  | -0.61805100 |
| H | -5.69204000 | -0.33509800 | 0.12679300  |
| C | -0.39906700 | 0.40072000  | -0.17071200 |
| H | -0.08700300 | 1.39924800  | -0.51213800 |
| N | 0.45408300  | -0.51020300 | 0.11650400  |
| C | 1.82767700  | -0.22117900 | 0.07074800  |
| C | 2.69265600  | -1.23217900 | -0.37783600 |
| C | 2.37163900  | 1.00414700  | 0.49384200  |
| C | 4.06426500  | -1.00646600 | -0.44759900 |
| H | 2.26170100  | -2.18173400 | -0.67909300 |
| C | 3.74788700  | 1.21715200  | 0.43853900  |
| H | 1.71599500  | 1.76975800  | 0.89808700  |
| C | 4.59878400  | 0.21919300  | -0.04035400 |
| H | 4.72074700  | -1.79244900 | -0.81052000 |
| H | 4.15783000  | 2.16412400  | 0.77919900  |
| H | 5.67083900  | 0.38856300  | -0.08037000 |

### CO

|   |             |            |            |
|---|-------------|------------|------------|
| O | 0.62968500  | 0.11677300 | 0.00000000 |
| C | -0.50804200 | 0.11677300 | 0.00000000 |

### "BuI

|   |             |             |             |
|---|-------------|-------------|-------------|
| C | -2.02735300 | 0.28335500  | -0.02912700 |
| H | -1.67686800 | -0.75464900 | -0.06989500 |
| H | -1.66788300 | 0.79461100  | -0.92867400 |
| H | -3.12288700 | 0.26624700  | -0.06746700 |
| C | -1.53207000 | 0.98217900  | 1.24025000  |
| H | -0.43407100 | 1.01188500  | 1.24154100  |
| H | -1.86946100 | 2.02751500  | 1.24205600  |
| C | -2.02535900 | 0.28519600  | 2.51881500  |
| H | -1.68458700 | -0.75691700 | 2.52761100  |
| H | -3.12142300 | 0.25977000  | 2.52639000  |
| C | -1.51916200 | 1.00202800  | 3.75695400  |

|                        |             |             |             |
|------------------------|-------------|-------------|-------------|
| H                      | -1.88645000 | 2.02558300  | 3.83204100  |
| H                      | -0.43183700 | 0.99656100  | 3.83336100  |
| I                      | -2.20536300 | 0.03482200  | 5.62263400  |
| <b>"Bu</b>             |             |             |             |
| C                      | -2.05042600 | 0.25123300  | -0.06115100 |
| H                      | -1.70323600 | -0.78928900 | -0.06522200 |
| H                      | -1.72006400 | 0.71795400  | -0.99600300 |
| H                      | -3.14717300 | 0.23369400  | -0.06488900 |
| C                      | -1.51610100 | 1.00515700  | 1.15936600  |
| H                      | -0.41919800 | 1.03440400  | 1.13161200  |
| H                      | -1.85348600 | 2.04933500  | 1.13239100  |
| C                      | -1.96959000 | 0.36329300  | 2.49509300  |
| H                      | -1.62894800 | -0.68208100 | 2.50403600  |
| H                      | -3.06871100 | 0.33437200  | 2.50374000  |
| C                      | -1.46479300 | 1.07881100  | 3.70176100  |
| H                      | -1.98616800 | 1.94835700  | 4.09085200  |
| H                      | -0.47151500 | 0.87812500  | 4.09227100  |
| <b>"BuCO</b>           |             |             |             |
| C                      | -2.06014600 | 0.23879400  | 0.03083600  |
| H                      | -1.69853200 | -0.79619700 | 0.01004700  |
| H                      | -1.73569400 | 0.72609700  | -0.89514500 |
| H                      | -3.15619000 | 0.20687500  | 0.02715600  |
| C                      | -1.53614000 | 0.97961100  | 1.26421600  |
| H                      | -0.43861400 | 1.02458000  | 1.22859300  |
| H                      | -1.88577300 | 2.02134100  | 1.24441500  |
| C                      | -1.97519800 | 0.32177900  | 2.57606100  |
| H                      | -1.62609300 | -0.71783100 | 2.60927000  |
| H                      | -3.07038900 | 0.27695500  | 2.62455100  |
| C                      | -1.44982500 | 1.06506100  | 3.81101400  |
| H                      | -1.78973400 | 2.10950700  | 3.83131300  |
| H                      | -0.35246900 | 1.11661200  | 3.81710700  |
| O                      | -2.53025700 | -0.52951900 | 5.30195700  |
| C                      | -1.86495700 | 0.44385900  | 5.13655600  |
| <b>PPh<sub>3</sub></b> |             |             |             |
| C                      | 12.41895900 | 1.02608400  | 8.94650700  |
| C                      | 13.76072300 | 0.64903200  | 8.86982800  |
| C                      | 14.31767600 | 0.27595300  | 7.64552200  |
| C                      | 13.53626300 | 0.27029700  | 6.48137100  |
| C                      | 12.18509200 | 0.63944500  | 6.57223400  |
| C                      | 11.63152700 | 1.02282500  | 7.79320100  |
| H                      | 14.37749100 | 0.64746200  | 9.76463000  |

|   |             |             |            |
|---|-------------|-------------|------------|
| H | 15.36309100 | -0.00986700 | 7.59260000 |
| H | 11.56572700 | 0.62468100  | 5.67870900 |
| H | 10.58503800 | 1.31028800  | 7.84644900 |
| C | 15.64854700 | 3.85398100  | 3.04192500 |
| C | 15.31043700 | 3.79577300  | 4.39466900 |
| C | 14.86357500 | 2.59899800  | 4.95791800 |
| C | 14.74413800 | 1.44456600  | 4.17149200 |
| C | 15.07410300 | 1.51803400  | 2.80876300 |
| C | 15.53128400 | 2.71011700  | 2.24914000 |
| H | 15.39702700 | 4.68326500  | 5.01591000 |
| H | 14.60859700 | 2.56180400  | 6.01194300 |
| H | 14.97190000 | 0.63297200  | 2.18543300 |
| H | 15.78759700 | 2.74921100  | 1.19395900 |
| C | 18.13629700 | -2.35752400 | 5.94386800 |
| C | 18.17634000 | -0.99351400 | 5.65110800 |
| C | 17.00713100 | -0.31276300 | 5.30672900 |
| C | 15.78180800 | -0.99121600 | 5.24557700 |
| C | 15.75534300 | -2.36585600 | 5.52954900 |
| C | 16.92097000 | -3.04304400 | 5.88452900 |
| H | 19.11963000 | -0.45546300 | 5.69304500 |
| H | 17.04612300 | 0.74896300  | 5.08625600 |
| H | 14.81345600 | -2.90602500 | 5.47133100 |
| H | 16.88298100 | -4.10616400 | 6.10584300 |
| P | 14.17526200 | -0.19060900 | 4.81200100 |
| H | 19.04745600 | -2.88515600 | 6.21177000 |
| H | 15.99670400 | 4.78627700  | 2.60601500 |
| H | 11.98757100 | 1.31626700  | 9.90050000 |

**NaO<sup>t</sup>Bu**

|    |             |             |             |
|----|-------------|-------------|-------------|
| C  | -0.73523600 | 0.85512300  | 0.15228200  |
| C  | 0.79772500  | 0.86370200  | -0.06092100 |
| H  | -1.12751900 | 1.87207800  | 0.02752100  |
| H  | -1.20621100 | 0.21592800  | -0.60486600 |
| H  | -1.02823900 | 0.48952600  | 1.14595800  |
| C  | 1.33486100  | -0.57684800 | 0.11906900  |
| C  | 1.44502800  | 1.77516800  | 1.00943900  |
| H  | 2.42140800  | -0.58387500 | -0.03265300 |
| H  | 1.12063300  | -0.99369200 | 1.11266100  |
| H  | 0.88400900  | -1.23259500 | -0.63618200 |
| H  | 1.23496000  | 1.44706000  | 2.03667500  |
| H  | 2.53268200  | 1.79209000  | 0.86676100  |
| H  | 1.07281700  | 2.80035300  | 0.89049400  |
| O  | 1.09695400  | 1.32575500  | -1.31803900 |
| Na | 1.52092200  | 1.98606400  | -3.12878800 |

**NaI**

|    |            |            |            |
|----|------------|------------|------------|
| Na | 3.67816200 | 0.75682400 | 0.00000000 |
| I  | 0.84990300 | 0.75682400 | 0.00000000 |

**B<sub>2</sub>pin<sub>2</sub>**

|   |             |             |             |
|---|-------------|-------------|-------------|
| B | -0.85832800 | -2.06973900 | 1.83909500  |
| C | 1.31093300  | -2.64816700 | 1.41884100  |
| C | 1.78668400  | -3.51845800 | 2.58642800  |
| H | 2.85189700  | -3.37055900 | 2.79155200  |
| H | 1.62493900  | -4.57021500 | 2.33251700  |
| H | 1.22140900  | -3.29846000 | 3.49711800  |
| C | 1.21934100  | -1.12319800 | 1.77816900  |
| C | 1.26731300  | -0.20804700 | 0.55039200  |
| H | 2.26941500  | -0.17503900 | 0.11076300  |
| H | 0.98771700  | 0.80525400  | 0.85350900  |
| H | 0.56007500  | -0.54064700 | -0.21541200 |
| C | 2.21233700  | -0.64621100 | 2.83204000  |
| H | 2.05386600  | 0.41819200  | 3.03108300  |
| H | 3.24230400  | -0.77778000 | 2.48127500  |
| H | 2.09076400  | -1.18753000 | 3.77238900  |
| C | 2.10998200  | -2.96904200 | 0.16078700  |
| H | 1.69218500  | -2.47281600 | -0.71753900 |
| H | 2.09299700  | -4.04827300 | -0.01995500 |
| H | 3.15490800  | -2.65901500 | 0.27566800  |
| O | -0.12592000 | -1.01318100 | 2.32466800  |
| O | -0.08327700 | -2.99568500 | 1.18319300  |
| B | -2.53921500 | -2.21611000 | 2.02340100  |
| C | -4.56360100 | -2.63816600 | 2.99225100  |
| C | -4.67373800 | -4.15583000 | 3.17165800  |
| H | -5.70809000 | -4.49998000 | 3.06993000  |
| H | -4.31684300 | -4.42036100 | 4.17139700  |
| H | -4.05552300 | -4.68431600 | 2.43970400  |
| C | -4.76339700 | -2.17304300 | 1.50726200  |
| C | -5.17343600 | -0.70190700 | 1.38365800  |
| H | -6.20750800 | -0.54267500 | 1.70631700  |
| H | -5.08603700 | -0.39721200 | 0.33656700  |
| H | -4.51863900 | -0.05907600 | 1.97969500  |
| C | -5.68969600 | -3.05096800 | 0.67338100  |
| H | -5.74450700 | -2.66105500 | -0.34772800 |
| H | -6.70242000 | -3.05267500 | 1.09243900  |
| H | -5.32984000 | -4.08059200 | 0.62283100  |
| C | -5.43415300 | -1.92071300 | 4.01764800  |
| H | -5.25451200 | -0.84372500 | 4.01363000  |

|   |             |             |            |
|---|-------------|-------------|------------|
| H | -5.20831400 | -2.29785400 | 5.01989700 |
| H | -6.49649600 | -2.10066100 | 3.81706100 |
| O | -3.41549500 | -2.27501900 | 0.96641800 |
| O | -3.17144300 | -2.29118000 | 3.24123400 |

**Bpin-O'Bu**

|   |             |             |            |
|---|-------------|-------------|------------|
| B | -1.64300800 | -4.10479500 | 4.38408700 |
| C | -0.63895100 | -6.05116700 | 3.76731300 |
| C | -1.17252600 | -6.38173800 | 2.36972800 |
| H | -1.25744500 | -7.46204500 | 2.21442300 |
| H | -0.48282200 | -5.97777600 | 1.62239900 |
| H | -2.15556100 | -5.92912100 | 2.20671000 |
| C | -1.69257000 | -6.31270900 | 4.90468900 |
| C | -1.05294800 | -6.44156400 | 6.29152100 |
| H | -0.50870900 | -7.38522100 | 6.40090800 |
| H | -1.84212100 | -6.40563200 | 7.04813000 |
| H | -0.36060700 | -5.61598700 | 6.48408200 |
| C | -2.63762100 | -7.48101100 | 4.64779600 |
| H | -3.33908300 | -7.57659100 | 5.48233800 |
| H | -2.07961200 | -8.42026600 | 4.56195100 |
| H | -3.21765800 | -7.33212800 | 3.73467400 |
| C | 0.72178700  | -6.70177700 | 3.98440300 |
| H | 1.18558200  | -6.35715400 | 4.91087200 |
| H | 1.38926500  | -6.44728300 | 3.15501500 |
| H | 0.62737100  | -7.79268200 | 4.02295600 |
| O | -2.46043600 | -5.08490500 | 4.90382300 |
| O | -0.47938200 | -4.60991300 | 3.82779600 |
| C | -1.12951600 | -1.90918700 | 2.35073600 |
| C | -1.24338500 | -1.71064500 | 3.86618600 |
| H | -0.55169800 | -2.80754100 | 2.12030100 |
| H | -2.12675100 | -2.00841800 | 1.90845200 |
| H | -0.63366000 | -1.04759200 | 1.89038800 |
| C | -2.06566700 | -0.46136200 | 4.18698900 |
| C | 0.13722400  | -1.63545200 | 4.52701700 |
| H | -2.17732200 | -0.34882300 | 5.27012400 |
| H | -1.57748000 | 0.43495000  | 3.78998000 |
| H | -3.06436800 | -0.54093800 | 3.74595900 |
| H | 0.68982200  | -0.76516800 | 4.15617000 |
| H | 0.02917500  | -1.53664200 | 5.61258200 |
| H | 0.71935500  | -2.53520200 | 4.31267300 |
| O | -1.99833000 | -2.80251100 | 4.44501600 |

**2a**

|   |             |             |             |
|---|-------------|-------------|-------------|
| C | -4.01824100 | -2.58284400 | -6.64334600 |
|---|-------------|-------------|-------------|

|   |             |             |             |
|---|-------------|-------------|-------------|
| H | -4.98005800 | -2.43146200 | -6.13861100 |
| H | -4.14090100 | -3.40455000 | -7.35720000 |
| H | -3.79618700 | -1.67309500 | -7.21357000 |
| C | -2.90772400 | -2.88391600 | -5.63403200 |
| H | -3.13844300 | -3.81366000 | -5.09571900 |
| H | -1.96273400 | -3.06205800 | -6.16528500 |
| C | -2.70930500 | -1.75096900 | -4.62392200 |
| H | -3.64982700 | -1.56941100 | -4.08713900 |
| H | -2.45815800 | -0.81889800 | -5.14339900 |
| C | -1.59637300 | -2.06865100 | -3.60782300 |
| H | -0.65843800 | -2.25015800 | -4.14506200 |
| H | -1.84303500 | -2.96690800 | -3.03637100 |
| O | -0.81804800 | 0.14693400  | -3.13182500 |
| C | -1.34887200 | -0.91393000 | -2.68492800 |
| B | -0.59773500 | 1.23530200  | -1.88055600 |
| O | -1.22173100 | 2.47324600  | -2.17152400 |
| C | -0.19181100 | 3.36848700  | -2.62352500 |
| C | 1.06799800  | 2.82836700  | -1.85622700 |
| O | 0.81156100  | 1.41742000  | -1.80772400 |
| C | -1.36552500 | 0.35904200  | -0.71221400 |
| H | -2.33092200 | 0.82960100  | -0.49227800 |
| C | -0.61143800 | 0.14929600  | 0.57268800  |
| C | -1.20371800 | 0.45945000  | 1.80075000  |
| C | -0.51704000 | 0.26173000  | 3.00085700  |
| C | 0.77295300  | -0.26614700 | 2.98580700  |
| C | 1.37545500  | -0.58087500 | 1.76370100  |
| C | 0.69376900  | -0.36794500 | 0.56773600  |
| H | -2.21565500 | 0.85696100  | 1.81537700  |
| H | -0.99446800 | 0.51201600  | 3.94436700  |
| H | 1.30945200  | -0.42708900 | 3.91686500  |
| H | 2.38599300  | -0.98039600 | 1.74362000  |
| H | 1.17771200  | -0.57371000 | -0.38025900 |
| C | 2.39976800  | 3.06268400  | -2.56386400 |
| H | 2.59298200  | 4.13422600  | -2.69351900 |
| H | 3.21458000  | 2.64065900  | -1.96586600 |
| H | 2.41593400  | 2.58145100  | -3.54429900 |
| C | 1.14287600  | 3.34052300  | -0.41021700 |
| H | 0.18343600  | 3.21123500  | 0.09935000  |
| H | 1.88944400  | 2.75225000  | 0.13195700  |
| H | 1.42698900  | 4.39758100  | -0.36152000 |
| C | -0.59624400 | 4.79557900  | -2.26501200 |
| H | 0.20722800  | 5.50232100  | -2.50371700 |
| H | -1.48415100 | 5.08435400  | -2.83761100 |
| H | -0.83627700 | 4.88352400  | -1.20305100 |



|            |             |             |             |
|------------|-------------|-------------|-------------|
| C          | -0.06101300 | 3.22623200  | -4.14686000 |
| H          | -1.04175400 | 3.40374000  | -4.59988600 |
| H          | 0.64924100  | 3.94819300  | -4.56505100 |
| H          | 0.26074400  | 2.21734000  | -4.41862100 |
| N          | -1.66746300 | -0.93662200 | -1.38905600 |
| C          | -2.41831100 | -1.97230100 | -0.75070900 |
| C          | -3.78793100 | -2.08658100 | -1.00702500 |
| C          | -1.79514300 | -2.82948600 | 0.16008100  |
| C          | -4.53224800 | -3.07753000 | -0.36789900 |
| H          | -4.25877800 | -1.39433100 | -1.69838900 |
| C          | -2.54807500 | -3.81213700 | 0.80238900  |
| H          | -0.73693400 | -2.71376700 | 0.36216500  |
| C          | -3.91301500 | -3.94092700 | 0.53787100  |
| H          | -5.59475000 | -3.16969600 | -0.57274500 |
| H          | -2.06484700 | -4.47862600 | 1.51051000  |
| H          | -4.49369100 | -4.70974400 | 1.03904200  |
| <b>3a'</b> |             |             |             |
| C          | -0.85299800 | 1.68223900  | -1.03702200 |
| O          | -1.35663400 | 2.71458000  | -1.42908400 |
| C          | -1.72347500 | 0.71888600  | -0.15912700 |
| H          | -2.57203300 | 0.49549100  | -0.81669000 |
| C          | -1.05364800 | -0.59867300 | 0.18824700  |
| C          | -0.40950600 | -0.81271300 | 1.41084400  |
| C          | -1.05882500 | -1.63133800 | -0.75819700 |
| C          | 0.22754100  | -2.02514700 | 1.67419400  |
| H          | -0.41077800 | -0.03006600 | 2.15945700  |
| C          | -0.42054100 | -2.84395300 | -0.49982200 |
| H          | -1.57276100 | -1.48333700 | -1.70597000 |
| C          | 0.22883200  | -3.04353400 | 0.71950100  |
| H          | 0.72157000  | -2.17553600 | 2.63021600  |
| H          | -0.43801400 | -3.63380000 | -1.24558600 |
| H          | 0.72331700  | -3.98803800 | 0.92757700  |
| N          | -2.26848700 | 1.46089400  | 0.98329700  |
| C          | -3.62093300 | 1.21289600  | 1.33814600  |
| C          | -4.19179100 | -0.05216700 | 1.12777400  |
| C          | -4.41654500 | 2.22925100  | 1.89065900  |
| C          | -5.52663300 | -0.28942100 | 1.45526000  |
| H          | -3.58778500 | -0.85994600 | 0.73042900  |
| C          | -5.74376500 | 1.97660900  | 2.22746000  |
| H          | -3.98955200 | 3.21003900  | 2.05266400  |
| C          | -6.31227000 | 0.72001600  | 2.00926000  |
| H          | -5.94620700 | -1.27703000 | 1.28346900  |
| H          | -6.34287700 | 2.77840800  | 2.65088900  |

|   |             |            |             |
|---|-------------|------------|-------------|
| H | -7.35057200 | 0.53250800 | 2.26653700  |
| C | 0.55818800  | 1.27070100 | -1.39607300 |
| C | 1.37478600  | 2.41720000 | -1.98544200 |
| H | 0.50410300  | 0.42322500 | -2.09599000 |
| H | 1.03143100  | 0.86951800 | -0.49377900 |
| C | 2.82996900  | 2.02633000 | -2.25547800 |
| H | 0.90031000  | 2.77156500 | -2.90831800 |
| H | 1.34094300  | 3.26202300 | -1.28669700 |
| C | 3.65948100  | 3.18522000 | -2.81401300 |
| H | 3.28663400  | 1.66370700 | -1.32328600 |
| H | 2.85953600  | 1.17986400 | -2.95621300 |
| H | 4.69784500  | 2.88625100 | -2.99661000 |
| H | 3.24299900  | 3.54712000 | -3.76184500 |
| H | 3.67185700  | 4.03109300 | -2.11567100 |
| C | -0.65951400 | 4.12247400 | 2.88720100  |
| C | 0.55677400  | 3.30450700 | 2.32551600  |
| C | -0.55978300 | 4.49818700 | 4.35959300  |
| H | 0.30617800  | 5.14663100 | 4.53382800  |
| H | -1.45928700 | 5.04296100 | 4.66220600  |
| H | -0.46987000 | 3.61411000 | 4.99429800  |
| C | -0.98859200 | 5.35154200 | 2.03401800  |
| H | -1.95855400 | 5.74934700 | 2.34666900  |
| H | -0.23710200 | 6.13832700 | 2.15434600  |
| H | -1.05371500 | 5.08730000 | 0.97374700  |
| C | 1.64117600  | 4.13712600 | 1.65259500  |
| H | 2.09460300  | 4.83318600 | 2.36705800  |
| H | 2.42873700  | 3.47839000 | 1.27263100  |
| H | 1.24203600  | 4.70681000 | 0.81111600  |
| C | 1.17238200  | 2.35601700 | 3.35878400  |
| H | 1.84401400  | 1.66164700 | 2.84504900  |
| H | 1.74716900  | 2.90015300 | 4.11470200  |
| H | 0.39854500  | 1.77146400 | 3.86646500  |
| O | -0.08115900 | 2.47724500 | 1.32071800  |
| O | -1.76196300 | 3.18873400 | 2.71963400  |
| B | -1.41574800 | 2.36731200 | 1.66976900  |

**Cat1**

|   |            |            |            |
|---|------------|------------|------------|
| C | 6.99988000 | 0.45580800 | 4.97034400 |
| C | 8.32903000 | 0.54766400 | 4.55482700 |
| C | 8.65225800 | 0.41810800 | 3.20291700 |
| C | 7.64493300 | 0.19900600 | 2.25450400 |
| C | 6.31329200 | 0.09355100 | 2.68422500 |
| C | 5.99127300 | 0.22689700 | 4.03231200 |
| H | 9.11731300 | 0.71539200 | 5.28391900 |

|   |             |             |             |
|---|-------------|-------------|-------------|
| H | 9.68910000  | 0.47440200  | 2.88635600  |
| H | 5.53428500  | -0.11989900 | 1.95686800  |
| H | 4.95899300  | 0.12734000  | 4.35391700  |
| C | 8.07821900  | 4.25960600  | -1.32318900 |
| C | 8.30014100  | 4.09338600  | 0.04542900  |
| C | 8.25802700  | 2.81844800  | 0.61100000  |
| C | 7.99419800  | 1.69990400  | -0.19216800 |
| C | 7.75483300  | 1.87164500  | -1.56523900 |
| C | 7.80511200  | 3.14878500  | -2.12406700 |
| H | 8.50216800  | 4.95628700  | 0.67435300  |
| H | 8.41945000  | 2.69367900  | 1.67738300  |
| H | 7.51219900  | 1.01459200  | -2.18788800 |
| H | 7.61825800  | 3.27428700  | -3.18699500 |
| C | 12.31584400 | -1.56650200 | 0.25561900  |
| C | 12.09091200 | -0.19403100 | 0.38954300  |
| C | 10.78819800 | 0.30374500  | 0.43881900  |
| C | 9.69544300  | -0.57114100 | 0.36137200  |
| C | 9.93092200  | -1.94527800 | 0.20406200  |
| C | 11.23319500 | -2.44231400 | 0.15868600  |
| H | 12.93187100 | 0.49142700  | 0.45032700  |
| H | 10.61858100 | 1.37271700  | 0.52555900  |
| H | 9.09686200  | -2.62918900 | 0.09843500  |
| H | 11.39107700 | -3.50988100 | 0.03553200  |
| P | 7.94934900  | -0.01395600 | 0.45712300  |
| C | 2.21025200  | -5.56481300 | -0.61342800 |
| C | 3.08900900  | -6.17415100 | 0.28841900  |
| C | 4.25738800  | -5.51999000 | 0.67120300  |
| C | 4.55075700  | -4.24446100 | 0.16387400  |
| C | 3.67448800  | -3.64425100 | -0.74795900 |
| C | 2.50596700  | -4.30518000 | -1.13335800 |
| H | 2.86550000  | -7.16080500 | 0.68494000  |
| H | 4.94674300  | -5.99687000 | 1.36229900  |
| H | 3.93554200  | -2.68329000 | -1.17975600 |
| H | 1.83408700  | -3.83716600 | -1.84727600 |
| C | 6.40072900  | -3.16400200 | 5.20338100  |
| C | 5.18314100  | -3.48954600 | 4.60771100  |
| C | 5.08654600  | -3.61067600 | 3.21966800  |
| C | 6.20984800  | -3.40281000 | 2.40734000  |
| C | 7.42568200  | -3.04440100 | 3.01800600  |
| C | 7.52310600  | -2.94171500 | 4.40200200  |
| H | 4.30222700  | -3.65545700 | 5.22208300  |
| H | 4.13438200  | -3.86859000 | 2.76874000  |
| H | 8.29803800  | -2.83236600 | 2.40803700  |
| H | 8.46984000  | -2.66094000 | 4.85256300  |

|            |             |             |             |
|------------|-------------|-------------|-------------|
| C          | 9.43189900  | -6.11196000 | -1.11960400 |
| C          | 9.25637400  | -6.05848400 | 0.26415700  |
| C          | 8.23809300  | -5.27735400 | 0.81565100  |
| C          | 7.39087700  | -4.53403100 | -0.01546400 |
| C          | 7.56043800  | -4.60449200 | -1.41119100 |
| C          | 8.57461400  | -5.39052600 | -1.95443700 |
| H          | 9.91003400  | -6.62808800 | 0.91945100  |
| H          | 8.11321300  | -5.24087800 | 1.89231100  |
| H          | 6.90267700  | -4.03666900 | -2.06258000 |
| H          | 8.69929200  | -5.43082700 | -3.03308800 |
| P          | 6.10216800  | -3.36176500 | 0.57766800  |
| Cu         | 6.54225000  | -1.43908900 | -0.74094800 |
| B          | 6.10756900  | -1.47244400 | -2.72107700 |
| O          | 6.51178500  | -0.53207200 | -3.67049200 |
| C          | 5.92896000  | -0.86355400 | -4.95640400 |
| C          | 5.64440200  | -2.39356400 | -4.80295600 |
| O          | 5.45592000  | -2.52708300 | -3.37147200 |
| C          | 6.84653100  | -3.27285600 | -5.17128200 |
| H          | 6.64442700  | -4.29822900 | -4.84446000 |
| H          | 7.03131800  | -3.28544700 | -6.25096200 |
| H          | 7.75165000  | -2.92585000 | -4.66342500 |
| C          | 4.39149700  | -2.89605000 | -5.51280400 |
| H          | 4.46903900  | -2.75149000 | -6.59710300 |
| H          | 4.26428700  | -3.96628800 | -5.31985800 |
| H          | 3.49717600  | -2.38108100 | -5.15528800 |
| C          | 6.92070300  | -0.49484600 | -6.05503900 |
| H          | 6.54471500  | -0.79590400 | -7.04019700 |
| H          | 7.07044500  | 0.58982300  | -6.06660400 |
| H          | 7.89203800  | -0.96641300 | -5.89154800 |
| C          | 4.65357300  | -0.02341000 | -5.09413000 |
| H          | 4.91391700  | 1.03317700  | -4.97774300 |
| H          | 4.17644500  | -0.15767400 | -6.07133700 |
| H          | 3.93347900  | -0.28164000 | -4.31205500 |
| H          | 8.10869000  | 5.25358700  | -1.76128600 |
| H          | 6.75169300  | 0.54669100  | 6.02408500  |
| H          | 6.47413300  | -3.07064900 | 6.28316100  |
| H          | 13.33215200 | -1.94853800 | 0.21476600  |
| H          | 10.22824500 | -6.71643800 | -1.54503700 |
| H          | 1.30185800  | -6.07898300 | -0.91551300 |
| <b>IM1</b> |             |             |             |
| C          | 6.18551200  | 0.56245600  | 4.59747600  |
| C          | 7.53647800  | 0.23496900  | 4.48105100  |
| C          | 8.07501200  | -0.08420900 | 3.23355300  |

|   |             |             |             |
|---|-------------|-------------|-------------|
| C | 7.26591800  | -0.07159900 | 2.08986300  |
| C | 5.90607700  | 0.26079200  | 2.21223500  |
| C | 5.37373800  | 0.57346500  | 3.46122200  |
| H | 8.17341300  | 0.22307700  | 5.36173500  |
| H | 9.12467100  | -0.34710700 | 3.15107300  |
| H | 5.26754300  | 0.27491400  | 1.33409300  |
| H | 4.31835800  | 0.81539800  | 3.54598000  |
| C | 9.10207100  | 3.63934300  | -1.36519900 |
| C | 8.97048600  | 3.51718600  | 0.01967700  |
| C | 8.61654500  | 2.29079700  | 0.58545800  |
| C | 8.38290900  | 1.17818700  | -0.23465800 |
| C | 8.49625400  | 1.31407200  | -1.62409700 |
| C | 8.86757100  | 2.53370600  | -2.18523500 |
| H | 9.14304600  | 4.37690300  | 0.66160900  |
| H | 8.51309800  | 2.20093600  | 1.66228400  |
| H | 8.27901600  | 0.46885400  | -2.26415200 |
| H | 8.96049000  | 2.61817200  | -3.26415700 |
| C | 11.91020700 | -2.68205400 | 1.19113400  |
| C | 11.90323900 | -1.28541300 | 1.16565900  |
| C | 10.71164300 | -0.59159900 | 0.94638300  |
| C | 9.51231800  | -1.28948200 | 0.75398200  |
| C | 9.53055500  | -2.69215200 | 0.77418700  |
| C | 10.71911300 | -3.38596000 | 0.99533600  |
| H | 12.82870600 | -0.73452200 | 1.31038800  |
| H | 10.71395600 | 0.49324900  | 0.91042400  |
| H | 8.61606800  | -3.24360600 | 0.57712700  |
| H | 10.71453400 | -4.47240700 | 0.99534500  |
| P | 7.90084600  | -0.46985500 | 0.41286500  |
| C | 1.01096300  | -4.37539400 | -1.16626800 |
| C | 1.88829200  | -5.41819100 | -0.86128200 |
| C | 3.21395900  | -5.14323900 | -0.52596500 |
| C | 3.67406800  | -3.82088800 | -0.50742400 |
| C | 2.79734200  | -2.77735700 | -0.83899300 |
| C | 1.46875500  | -3.05677100 | -1.15571800 |
| H | 1.53836600  | -6.44700200 | -0.87745400 |
| H | 3.89023300  | -5.95587300 | -0.28042700 |
| H | 3.16318400  | -1.75471800 | -0.84308000 |
| H | 0.79748300  | -2.24201800 | -1.41194700 |
| C | 4.82625200  | -2.73802800 | 4.62503400  |
| C | 3.70586700  | -2.75215000 | 3.79639300  |
| C | 3.84641100  | -2.96505900 | 2.42373400  |
| C | 5.11471700  | -3.16019700 | 1.86280000  |
| C | 6.23802400  | -3.13321200 | 2.70469100  |
| C | 6.09419000  | -2.93242900 | 4.07404900  |

|    |            |             |             |
|----|------------|-------------|-------------|
| H  | 2.71470100 | -2.60111200 | 4.21557500  |
| H  | 2.96583000 | -2.98088500 | 1.79163100  |
| H  | 7.23150500 | -3.26736100 | 2.29061400  |
| H  | 6.97557500 | -2.90463600 | 4.70688100  |
| C  | 8.00102300 | -7.13991300 | -0.33919900 |
| C  | 7.15284000 | -7.01623100 | 0.76405000  |
| C  | 6.33414900 | -5.89421900 | 0.89669000  |
| C  | 6.35756100 | -4.88291800 | -0.07541900 |
| C  | 7.21102800 | -5.01328800 | -1.18208800 |
| C  | 8.02551500 | -6.13915900 | -1.31271400 |
| H  | 7.13093100 | -7.79251500 | 1.52411400  |
| H  | 5.68759400 | -5.79407100 | 1.76262100  |
| H  | 7.24188200 | -4.22977800 | -1.93582800 |
| H  | 8.68487800 | -6.22622900 | -2.17193400 |
| P  | 5.35895400 | -3.34715400 | 0.04525000  |
| Cu | 6.08357100 | -1.31537400 | -0.84216800 |
| B  | 4.93319600 | 0.22558100  | -1.46477600 |
| O  | 5.00655000 | 1.01625500  | -2.61514600 |
| C  | 4.23240300 | 2.22696700  | -2.40451600 |
| C  | 3.19950300 | 1.77207900  | -1.32240700 |
| O  | 3.93033200 | 0.72956700  | -0.62739100 |
| C  | 1.94708600 | 1.11250500  | -1.91261000 |
| H  | 1.37768800 | 0.65057700  | -1.09932000 |
| H  | 1.29968000 | 1.83727100  | -2.41820000 |
| H  | 2.21828200 | 0.32525500  | -2.62204700 |
| C  | 2.80526800 | 2.84556300  | -0.31357600 |
| H  | 2.31120100 | 3.69029400  | -0.80834200 |
| H  | 2.10686400 | 2.42462000  | 0.41741400  |
| H  | 3.67674800 | 3.21915900  | 0.22827700  |
| C  | 3.62669200 | 2.66137300  | -3.73446500 |
| H  | 2.98750000 | 3.54268200  | -3.60395700 |
| H  | 4.42631900 | 2.92373700  | -4.43491900 |
| H  | 3.02966900 | 1.86489800  | -4.18513200 |
| C  | 5.20904500 | 3.29199200  | -1.89271000 |
| H  | 6.02201100 | 3.40515300  | -2.61486800 |
| H  | 4.71997100 | 4.26367600  | -1.76176800 |
| H  | 5.65634700 | 2.98948300  | -0.94159400 |
| C  | 6.18715200 | -1.83505500 | -3.68508900 |
| H  | 6.21257300 | -0.74957500 | -3.82066200 |
| C  | 4.87558300 | -2.46738900 | -3.85159300 |
| C  | 4.70448600 | -3.85742200 | -3.76663800 |
| C  | 3.45200300 | -4.42247400 | -3.98382900 |
| C  | 2.36020000 | -3.61071000 | -4.29998900 |
| C  | 2.52374200 | -2.22645900 | -4.39286200 |

|   |             |             |             |
|---|-------------|-------------|-------------|
| C | 3.77253900  | -1.65705600 | -4.16506100 |
| H | 5.56035200  | -4.47949200 | -3.53125900 |
| H | 3.32211200  | -5.49679800 | -3.89739700 |
| H | 1.38297500  | -4.05575300 | -4.46235600 |
| H | 1.67510700  | -1.59197700 | -4.63394300 |
| H | 3.91214500  | -0.58203600 | -4.20716100 |
| N | 7.25985600  | -2.51475200 | -3.45851400 |
| C | 8.49760100  | -1.84979100 | -3.48265200 |
| C | 8.80914900  | -0.85296300 | -4.42550300 |
| C | 9.47648600  | -2.23284500 | -2.55358300 |
| C | 10.05365600 | -0.22484600 | -4.39689300 |
| H | 8.07932200  | -0.58969500 | -5.18493600 |
| C | 10.70785200 | -1.58574900 | -2.51370600 |
| H | 9.24526400  | -3.01889300 | -1.84588100 |
| C | 11.00098100 | -0.57430500 | -3.43210400 |
| H | 10.28306200 | 0.54225100  | -5.13185600 |
| H | 11.43364000 | -1.87018400 | -1.75829200 |
| H | 11.96328100 | -0.07176100 | -3.40428900 |
| H | -0.02310900 | -4.59161200 | -1.42107600 |
| H | 8.64188400  | -8.01196400 | -0.43675000 |
| H | 12.84053100 | -3.21897900 | 1.35413600  |
| H | 9.37790000  | 4.59498800  | -1.80279800 |
| H | 5.76486400  | 0.80154300  | 5.57044200  |
| H | 4.71607700  | -2.56780800 | 5.69224700  |

**TS1**

|   |            |            |             |
|---|------------|------------|-------------|
| C | 5.95863200 | 0.81708300 | 4.27581100  |
| C | 7.34303600 | 0.65303900 | 4.19983900  |
| C | 7.93942200 | 0.28453500 | 2.99328600  |
| C | 7.15172100 | 0.07952300 | 1.85279700  |
| C | 5.75960400 | 0.22521600 | 1.94090300  |
| C | 5.16847700 | 0.60032000 | 3.14581600  |
| H | 7.95956200 | 0.80881100 | 5.08101400  |
| H | 9.01546400 | 0.15013200 | 2.93782600  |
| H | 5.14540500 | 0.01796600 | 1.07109100  |
| H | 4.08859100 | 0.69364100 | 3.20743100  |
| C | 9.26939200 | 3.66090800 | -1.60531000 |
| C | 9.01391200 | 3.59509600 | -0.23369300 |
| C | 8.59571700 | 2.39618200 | 0.34528300  |
| C | 8.42403400 | 1.25395800 | -0.44894000 |
| C | 8.67592500 | 1.32725200 | -1.82528400 |
| C | 9.10383400 | 2.52315200 | -2.39776700 |
| H | 9.13746200 | 4.47813700 | 0.38738500  |
| H | 8.39001000 | 2.35526800 | 1.40975200  |

|   |             |             |             |
|---|-------------|-------------|-------------|
| H | 8.53767500  | 0.45561300  | -2.45183900 |
| H | 9.30073500  | 2.55810400  | -3.46517600 |
| C | 11.74036800 | -2.67923400 | 1.25778300  |
| C | 11.80429500 | -1.29558400 | 1.08352100  |
| C | 10.65125100 | -0.56956700 | 0.77781600  |
| C | 9.42209800  | -1.22616600 | 0.64568900  |
| C | 9.36837000  | -2.61779700 | 0.81051800  |
| C | 10.51758500 | -3.34122300 | 1.12016300  |
| H | 12.75553500 | -0.77891600 | 1.17667400  |
| H | 10.71038700 | 0.50318300  | 0.62431700  |
| H | 8.43443000  | -3.14338500 | 0.64629500  |
| H | 10.45718800 | -4.42054000 | 1.22739000  |
| P | 7.86323100  | -0.35641000 | 0.22081000  |
| C | 1.14611800  | -4.64918500 | -1.38910100 |
| C | 2.07075700  | -5.61686300 | -0.99358200 |
| C | 3.33591800  | -5.23679800 | -0.54349600 |
| C | 3.68609100  | -3.88228800 | -0.49630400 |
| C | 2.75975000  | -2.91276600 | -0.90924800 |
| C | 1.49381000  | -3.29791500 | -1.34481100 |
| H | 1.80839900  | -6.67065500 | -1.03402700 |
| H | 4.05078000  | -5.99395500 | -0.23891800 |
| H | 3.04294400  | -1.86614500 | -0.90934600 |
| H | 0.78920000  | -2.54165200 | -1.67872000 |
| C | 4.62267600  | -2.49614300 | 4.63126900  |
| C | 3.52947400  | -2.59136600 | 3.77188200  |
| C | 3.72052700  | -2.86211700 | 2.41508100  |
| C | 5.01158400  | -3.03443400 | 1.90196000  |
| C | 6.10739400  | -2.92718900 | 2.77438200  |
| C | 5.91394800  | -2.66736100 | 4.12746300  |
| H | 2.52080100  | -2.46254600 | 4.15529600  |
| H | 2.86236100  | -2.94463600 | 1.75719700  |
| H | 7.11713300  | -3.04686200 | 2.39726700  |
| H | 6.77363200  | -2.57964800 | 4.78462400  |
| C | 8.10985500  | -7.00075700 | -0.01758800 |
| C | 7.24023400  | -6.84732000 | 1.06530600  |
| C | 6.37775400  | -5.75208800 | 1.12109000  |
| C | 6.38123400  | -4.79876200 | 0.09209800  |
| C | 7.25276800  | -4.95956400 | -0.99734200 |
| C | 8.11130500  | -6.05866400 | -1.04836700 |
| H | 7.23594000  | -7.57860400 | 1.86903000  |
| H | 5.71320600  | -5.62920100 | 1.97041100  |
| H | 7.26683100  | -4.20431800 | -1.78150500 |
| H | 8.78936300  | -6.16819300 | -1.89010700 |
| P | 5.31800700  | -3.30042700 | 0.10632700  |



|    |             |             |             |
|----|-------------|-------------|-------------|
| Cu | 6.40767300  | -1.57022300 | -1.04693600 |
| B  | 5.12423600  | -0.03312600 | -1.84695200 |
| O  | 5.31872500  | 1.15980600  | -2.50233300 |
| C  | 4.44985600  | 2.17391900  | -1.92542500 |
| C  | 3.33884300  | 1.31812400  | -1.21250100 |
| O  | 4.01310700  | 0.03556500  | -1.01639500 |
| C  | 2.10277700  | 1.04150300  | -2.07118400 |
| H  | 1.46206200  | 0.32443800  | -1.54779700 |
| H  | 1.52426700  | 1.95473300  | -2.24490500 |
| H  | 2.36980600  | 0.60287700  | -3.03374900 |
| C  | 2.90428600  | 1.84268900  | 0.15300500  |
| H  | 2.41036000  | 2.81569600  | 0.05218100  |
| H  | 2.18966200  | 1.14431700  | 0.60069100  |
| H  | 3.74705400  | 1.95232400  | 0.83659700  |
| C  | 3.94505200  | 3.06139100  | -3.05835700 |
| H  | 3.24836900  | 3.81850500  | -2.68077000 |
| H  | 4.79238500  | 3.57797800  | -3.51927200 |
| H  | 3.44087500  | 2.47856100  | -3.83267200 |
| C  | 5.31244000  | 2.99174000  | -0.96057800 |
| H  | 6.18093600  | 3.37722800  | -1.50072000 |
| H  | 4.75495300  | 3.83648900  | -0.54204000 |
| H  | 5.68670200  | 2.37890800  | -0.13766200 |
| C  | 5.97580200  | -1.43396300 | -3.21107300 |
| H  | 6.18995300  | -0.53403200 | -3.78943400 |
| C  | 4.73385200  | -2.12147500 | -3.67873500 |
| C  | 4.59390000  | -3.51169700 | -3.58380700 |
| C  | 3.44655800  | -4.14148900 | -4.06066100 |
| C  | 2.42144900  | -3.39469900 | -4.64308400 |
| C  | 2.56098100  | -2.00996000 | -4.76303900 |
| C  | 3.71094900  | -1.38200700 | -4.28894000 |
| H  | 5.40130200  | -4.08469300 | -3.14490000 |
| H  | 3.34634300  | -5.21828000 | -3.96254100 |
| H  | 1.52484200  | -3.88766600 | -5.00849400 |
| H  | 1.77957500  | -1.42112600 | -5.23687400 |
| H  | 3.83603400  | -0.30839600 | -4.40432200 |
| N  | 7.06396700  | -2.24393900 | -2.90548300 |
| C  | 8.32167600  | -1.83635700 | -3.32907600 |
| C  | 8.56405200  | -1.02440700 | -4.46398600 |
| C  | 9.45604100  | -2.28326700 | -2.61108800 |
| C  | 9.85857100  | -0.62539400 | -4.80010100 |
| H  | 7.73509100  | -0.70953100 | -5.09024800 |
| C  | 10.74006900 | -1.88162100 | -2.95209000 |
| H  | 9.29643600  | -2.92263100 | -1.75159000 |
| C  | 10.95844400 | -1.03213200 | -4.04370800 |

|   |             |             |             |
|---|-------------|-------------|-------------|
| H | 10.00510600 | 0.00758700  | -5.67292500 |
| H | 11.57717100 | -2.22178700 | -2.34694700 |
| H | 11.96193800 | -0.70966700 | -4.30525700 |
| H | 0.16350500  | -4.94831600 | -1.74355400 |
| H | 8.78510100  | -7.85132900 | -0.05509200 |
| H | 12.64163800 | -3.24075200 | 1.48724300  |
| H | 9.59442300  | 4.59607100  | -2.05325200 |
| H | 5.49573300  | 1.09636400  | 5.21818300  |
| H | 4.47258100  | -2.28445700 | 5.68619000  |

**TS1'**

|   |             |             |             |
|---|-------------|-------------|-------------|
| C | 6.09541700  | 0.28785400  | -4.71975300 |
| C | 7.46566700  | 0.10307100  | -4.52105400 |
| C | 7.96320300  | -0.12418500 | -3.23894900 |
| C | 7.09364600  | -0.17101000 | -2.14205100 |
| C | 5.72153400  | 0.02668300  | -2.34815400 |
| C | 5.22409900  | 0.25381600  | -3.63081000 |
| H | 8.14677500  | 0.12980000  | -5.36742200 |
| H | 9.02663300  | -0.28246500 | -3.09320400 |
| H | 5.04981800  | -0.01497700 | -1.49390700 |
| H | 4.15668700  | 0.38731400  | -3.78018300 |
| C | 9.47573900  | 3.62478800  | 0.78007900  |
| C | 8.49512800  | 3.55708400  | -0.21183300 |
| C | 7.96910400  | 2.32392000  | -0.59597800 |
| C | 8.42086300  | 1.14298200  | 0.00803500  |
| C | 9.40932100  | 1.21567200  | 0.99690000  |
| C | 9.93199500  | 2.44968400  | 1.37917000  |
| H | 8.13752000  | 4.46534800  | -0.68945000 |
| H | 7.20353900  | 2.28353500  | -1.36320500 |
| H | 9.77808600  | 0.31371100  | 1.46634600  |
| H | 10.69278800 | 2.48404100  | 2.15304100  |
| C | 11.21096000 | -3.43229000 | -0.94145500 |
| C | 11.43109000 | -2.07046900 | -1.16135900 |
| C | 10.38927800 | -1.15499400 | -1.00772800 |
| C | 9.11322900  | -1.59119500 | -0.62433700 |
| C | 8.91036500  | -2.95752500 | -0.38347800 |
| C | 9.94549200  | -3.87579900 | -0.55308000 |
| H | 12.41772500 | -1.71888900 | -1.45037200 |
| H | 10.57348100 | -0.09671400 | -1.16265500 |
| H | 7.94232000  | -3.29693800 | -0.02908000 |
| H | 9.76144000  | -4.92947000 | -0.36212100 |
| P | 7.66659000  | -0.47210400 | -0.41817800 |
| C | 0.28565200  | -3.28060000 | 0.21284200  |
| C | 0.97069500  | -4.49199900 | 0.09679600  |

|    |            |             |             |
|----|------------|-------------|-------------|
| C  | 2.35420400 | -4.50078700 | -0.08369900 |
| C  | 3.06350400 | -3.29511400 | -0.13528700 |
| C  | 2.37127900 | -2.08180400 | -0.01945600 |
| C  | 0.98777800 | -2.07423300 | 0.14973600  |
| H  | 0.42796600 | -5.43177800 | 0.14779700  |
| H  | 2.88377400 | -5.44380900 | -0.17251600 |
| H  | 2.93316900 | -1.15031400 | -0.01860900 |
| H  | 0.46216400 | -1.12909400 | 0.25125000  |
| C  | 5.26826300 | -3.28766600 | -5.02832400 |
| C  | 4.00737300 | -3.37355800 | -4.43985700 |
| C  | 3.87633000 | -3.37300600 | -3.05014100 |
| C  | 5.00821700 | -3.27704400 | -2.22962100 |
| C  | 6.27208700 | -3.17776900 | -2.83305300 |
| C  | 6.40168800 | -3.19399100 | -4.21920100 |
| H  | 3.11854500 | -3.44355300 | -5.06097400 |
| H  | 2.88994400 | -3.44401900 | -2.60724100 |
| H  | 7.16155100 | -3.07354500 | -2.22386700 |
| H  | 7.38775600 | -3.10581400 | -4.66403300 |
| C  | 6.64216600 | -7.16902800 | 1.25740100  |
| C  | 6.96209100 | -6.76840600 | -0.04039600 |
| C  | 6.39264200 | -5.61442700 | -0.58308300 |
| C  | 5.50008500 | -4.84246100 | 0.17348000  |
| C  | 5.17262300 | -5.25859600 | 1.47428700  |
| C  | 5.73844300 | -6.41377200 | 2.00859100  |
| H  | 7.64974500 | -7.35837000 | -0.64060400 |
| H  | 6.64056500 | -5.32430900 | -1.59770300 |
| H  | 4.47400600 | -4.68361400 | 2.06794300  |
| H  | 5.47298600 | -6.71275900 | 3.01823200  |
| P  | 4.87586500 | -3.20716300 | -0.39400300 |
| Cu | 5.82502400 | -1.36983300 | 0.68800400  |
| B  | 5.23519600 | 0.13321200  | 2.01775500  |
| O  | 6.16468000 | 1.16007800  | 2.20804100  |
| C  | 5.46624000 | 2.30612000  | 2.75061100  |
| C  | 4.21120700 | 1.64479100  | 3.41115800  |
| O  | 3.99824700 | 0.49536900  | 2.54889500  |
| C  | 4.47687300 | 1.10750500  | 4.82152000  |
| H  | 3.62346100 | 0.49676500  | 5.13150900  |
| H  | 4.60862700 | 1.91744500  | 5.54717700  |
| H  | 5.36308200 | 0.46763200  | 4.83840400  |
| C  | 2.94773800 | 2.49713500  | 3.40157000  |
| H  | 3.09295400 | 3.41659000  | 3.98098400  |
| H  | 2.12293000 | 1.93729500  | 3.85446200  |
| H  | 2.65597100 | 2.76722300  | 2.38425300  |
| C  | 6.40491300 | 3.04052200  | 3.70333100  |

|            |             |             |             |
|------------|-------------|-------------|-------------|
| H          | 5.91415600  | 3.92281600  | 4.13159600  |
| H          | 7.29046400  | 3.37044400  | 3.15103700  |
| H          | 6.73857000  | 2.40014200  | 4.52256400  |
| C          | 5.10651200  | 3.21798800  | 1.57143300  |
| H          | 6.02351700  | 3.47896800  | 1.03848000  |
| H          | 4.61905500  | 4.14090200  | 1.90446300  |
| H          | 4.44131800  | 2.69999700  | 0.87367600  |
| C          | 7.16043300  | -2.08340800 | 2.77669800  |
| H          | 7.23381900  | -3.13817200 | 2.49511700  |
| C          | 8.38699900  | -1.39720200 | 3.10565600  |
| C          | 8.39210800  | -0.18120500 | 3.82437900  |
| C          | 9.58794600  | 0.40738100  | 4.21715300  |
| C          | 10.81435100 | -0.18799100 | 3.90294700  |
| C          | 10.82616700 | -1.39257900 | 3.18927800  |
| C          | 9.63313900  | -1.99180800 | 2.80092200  |
| H          | 7.44527600  | 0.28222200  | 4.05705000  |
| H          | 9.56387700  | 1.34298300  | 4.76987900  |
| H          | 11.74704400 | 0.27543100  | 4.21221100  |
| H          | 11.77051200 | -1.86657200 | 2.93482500  |
| H          | 9.65284000  | -2.92766300 | 2.25168500  |
| N          | 5.93862500  | -1.54984200 | 2.94422700  |
| C          | 4.92892100  | -2.44074100 | 3.39227000  |
| C          | 5.26909500  | -3.41515000 | 4.35258900  |
| C          | 3.59051700  | -2.35940400 | 2.97921500  |
| C          | 4.30987100  | -4.29875900 | 4.84527900  |
| H          | 6.29071500  | -3.46269000 | 4.71310600  |
| C          | 2.63931700  | -3.24732300 | 3.47217800  |
| H          | 3.31045500  | -1.61055600 | 2.25893200  |
| C          | 2.98881500  | -4.23308400 | 4.39972800  |
| H          | 4.60313000  | -5.04318500 | 5.58127600  |
| H          | 1.62065000  | -3.17904700 | 3.10113400  |
| H          | 2.24474000  | -4.93221300 | 4.77042600  |
| H          | -0.79125300 | -3.27667700 | 0.35653100  |
| H          | 7.08884900  | -8.06542200 | 1.67828500  |
| H          | 12.02529400 | -4.14130600 | -1.06187500 |
| H          | 9.88434200  | 4.58623500  | 1.07903300  |
| H          | 5.70838500  | 0.45305000  | -5.72131400 |
| H          | 5.36812500  | -3.28442400 | -6.11007800 |
| <b>IM2</b> |             |             |             |
| C          | -5.23017600 | 3.07727200  | 1.62168500  |
| C          | -5.62500200 | 2.17867900  | 0.62956400  |
| C          | -4.78534500 | 1.12777800  | 0.25586600  |
| C          | -3.53537300 | 0.96398100  | 0.86758800  |

|   |             |             |             |
|---|-------------|-------------|-------------|
| C | -3.14805000 | 1.87449200  | 1.86131400  |
| C | -3.98677200 | 2.92088300  | 2.24002000  |
| H | -6.58985300 | 2.29367300  | 0.14348500  |
| H | -5.09866500 | 0.43668100  | -0.51908200 |
| H | -2.17500800 | 1.77282200  | 2.32890700  |
| H | -3.66724200 | 3.61765500  | 3.00997900  |
| C | -3.20741600 | -3.76110500 | 3.46345000  |
| C | -4.17261400 | -2.76932900 | 3.27484700  |
| C | -3.95393800 | -1.74701600 | 2.35086700  |
| C | -2.76180900 | -1.70859300 | 1.61461500  |
| C | -1.78940900 | -2.70358000 | 1.80948100  |
| C | -2.02046100 | -3.72781000 | 2.72802500  |
| H | -5.09657200 | -2.79147600 | 3.84634500  |
| H | -4.70607100 | -0.97758700 | 2.20663400  |
| H | -0.85270700 | -2.65365300 | 1.25535400  |
| H | -1.26662000 | -4.49692600 | 2.87169200  |
| C | -3.97394700 | -1.85506200 | -3.69165600 |
| C | -4.20038300 | -2.63534900 | -2.55700700 |
| C | -3.76506800 | -2.19915200 | -1.30415500 |
| C | -3.09306100 | -0.97809300 | -1.18154800 |
| C | -2.86593500 | -0.19635300 | -2.32623200 |
| C | -3.31051400 | -0.63062500 | -3.57230200 |
| H | -4.71077300 | -3.59017900 | -2.64546900 |
| H | -3.92905700 | -2.81555700 | -0.42672200 |
| H | -2.33948600 | 0.74780200  | -2.24200000 |
| H | -3.12789200 | -0.01677300 | -4.44985900 |
| P | -2.37640200 | -0.39006600 | 0.40016900  |
| C | 3.63153200  | 4.20941500  | 1.25391600  |
| C | 3.93238100  | 2.87853300  | 0.94965900  |
| C | 3.03689500  | 2.10747300  | 0.21229600  |
| C | 1.83833000  | 2.66910600  | -0.25899200 |
| C | 1.54798100  | 4.00680500  | 0.03528400  |
| C | 2.43782600  | 4.76883800  | 0.79654800  |
| H | 4.86201400  | 2.42939000  | 1.28654100  |
| H | 3.27287000  | 1.07274000  | -0.00238300 |
| H | 0.63027500  | 4.45701900  | -0.32806600 |
| H | 2.19968700  | 5.80497400  | 1.02150700  |
| C | -2.91284900 | 4.07068700  | -2.63421200 |
| C | -1.97705900 | 3.61377500  | -3.56399500 |
| C | -0.84649700 | 2.91038200  | -3.14223000 |
| C | -0.64763400 | 2.64982300  | -1.77976200 |
| C | -1.59252100 | 3.11766400  | -0.85355100 |
| C | -2.71426500 | 3.82829700  | -1.27282700 |
| H | -2.12665700 | 3.80212000  | -4.62364600 |

|    |             |             |             |
|----|-------------|-------------|-------------|
| H  | -0.12891100 | 2.55024900  | -3.87141300 |
| H  | -1.46107300 | 2.89868200  | 0.19973400  |
| H  | -3.44184400 | 4.16112300  | -0.53920100 |
| C  | 2.92368900  | 0.20865800  | -4.96792600 |
| C  | 1.92989900  | -0.58899000 | -4.39610600 |
| C  | 1.26513600  | -0.15752900 | -3.24907900 |
| C  | 1.59192400  | 1.07423500  | -2.66400600 |
| C  | 2.58766100  | 1.87237800  | -3.24227600 |
| C  | 3.24964100  | 1.43956300  | -4.39139700 |
| H  | 1.68372300  | -1.55775600 | -4.82062100 |
| H  | 0.52333200  | -0.80230500 | -2.78818600 |
| H  | 2.85297500  | 2.82068300  | -2.78509700 |
| H  | 4.02583200  | 2.05899200  | -4.83238500 |
| P  | 0.68511100  | 1.55682500  | -1.15323800 |
| Cu | -0.04876600 | -0.24844000 | 0.08266400  |
| B  | 1.81438900  | -1.07160800 | 2.26622700  |
| O  | 2.33972700  | -1.20121800 | 3.52441100  |
| C  | 2.06442800  | 0.03566400  | 4.24399200  |
| C  | 0.80057800  | 0.58383300  | 3.48936000  |
| O  | 0.99761900  | 0.03677700  | 2.15201900  |
| C  | 0.72066900  | 2.09991200  | 3.37152000  |
| H  | 1.60071900  | 2.51455800  | 2.87777900  |
| H  | -0.15231600 | 2.37558100  | 2.77195100  |
| H  | 0.61478000  | 2.55965100  | 4.36048400  |
| C  | -0.50400100 | -0.00864800 | 4.02508800  |
| H  | -0.74951000 | 0.39667800  | 5.01166200  |
| H  | -1.32351700 | 0.22320800  | 3.34398000  |
| H  | -0.44439300 | -1.09813000 | 4.09408000  |
| C  | 3.29711200  | 0.92733300  | 4.07850000  |
| H  | 3.47183400  | 1.16888900  | 3.02776000  |
| H  | 3.19203600  | 1.86245900  | 4.63800100  |
| H  | 4.17381000  | 0.39374200  | 4.45773400  |
| C  | 1.84171900  | -0.29886700 | 5.71360200  |
| H  | 2.76879500  | -0.69010500 | 6.14351800  |
| H  | 1.55811400  | 0.59852200  | 6.27501300  |
| H  | 1.06361000  | -1.05381400 | 5.84170600  |
| C  | 2.12402600  | -2.00259100 | 1.03869100  |
| H  | 2.30803300  | -3.01956400 | 1.43212900  |
| C  | 3.45109700  | -1.50357400 | 0.42951700  |
| C  | 3.54511100  | -1.23308800 | -0.93954900 |
| C  | 4.71064300  | -0.69661900 | -1.48843700 |
| C  | 5.80620600  | -0.41209600 | -0.67147100 |
| C  | 5.73244800  | -0.69573500 | 0.69462300  |
| C  | 4.56845700  | -1.24285100 | 1.23821500  |

|   |             |             |             |
|---|-------------|-------------|-------------|
| H | 2.69233000  | -1.43394700 | -1.56993200 |
| H | 4.74827100  | -0.48747800 | -2.55348800 |
| H | 6.71011600  | 0.01900000  | -1.09348400 |
| H | 6.58266700  | -0.49035100 | 1.34078100  |
| H | 4.51964700  | -1.45688200 | 2.30184800  |
| N | 0.98597600  | -1.97527200 | 0.13495100  |
| C | 0.87836300  | -2.97208800 | -0.79867700 |
| C | 1.79987600  | -4.04275700 | -0.96382700 |
| C | -0.23174500 | -2.96387300 | -1.68801900 |
| C | 1.61251700  | -5.01127100 | -1.94801800 |
| H | 2.68519500  | -4.09627200 | -0.33998800 |
| C | -0.40566600 | -3.93380400 | -2.66555200 |
| H | -0.95695700 | -2.16531100 | -1.58971300 |
| C | 0.51661700  | -4.97685700 | -2.81330400 |
| H | 2.34970300  | -5.80642100 | -2.04371500 |
| H | -1.27713300 | -3.87257700 | -3.31425200 |
| H | 0.38467900  | -5.73700100 | -3.57780600 |
| H | 4.32522000  | 4.80663900  | 1.83918200  |
| H | 3.45016800  | -0.13079900 | -5.85565600 |
| H | -4.30824300 | -2.20099000 | -4.66567700 |
| H | -3.38022900 | -4.55653300 | 4.18333000  |
| H | -5.88439900 | 3.89501100  | 1.91043600  |
| H | -3.79592200 | 4.60740500  | -2.96912600 |

### IM3

|   |             |            |             |
|---|-------------|------------|-------------|
| C | 2.00438200  | 5.60163200 | -0.77317100 |
| C | 2.49307100  | 4.29901700 | -0.66187300 |
| C | 1.63631400  | 3.26290800 | -0.28939900 |
| C | 0.28570700  | 3.52008400 | -0.01271400 |
| C | -0.19601700 | 4.83418500 | -0.11616000 |
| C | 0.65971800  | 5.86674300 | -0.50102000 |
| H | 3.53782800  | 4.07670200 | -0.85670200 |
| H | 2.01720900  | 2.25257500 | -0.20829100 |
| H | -1.23755300 | 5.04845300 | 0.10103500  |
| H | 0.27704900  | 6.88058900 | -0.58180000 |
| C | -0.62875800 | 2.26201200 | 5.18176900  |
| C | -0.26172400 | 3.39798100 | 4.45716600  |
| C | -0.29237600 | 3.38429200 | 3.06209500  |
| C | -0.68430500 | 2.22621600 | 2.37889400  |
| C | -1.03592400 | 1.08369900 | 3.11304400  |
| C | -1.02008900 | 1.10440600 | 4.50671800  |
| H | 0.05104500  | 4.29841600 | 4.97864900  |
| H | -0.00127400 | 4.26985700 | 2.50716000  |
| H | -1.31980200 | 0.17675400 | 2.59328100  |

|    |             |             |             |
|----|-------------|-------------|-------------|
| H  | -1.30590900 | 0.21237500  | 5.05569900  |
| C  | -5.12178500 | 3.03230900  | -0.67008600 |
| C  | -4.84058100 | 2.52588800  | 0.59977400  |
| C  | -3.52067700 | 2.32484300  | 1.00408300  |
| C  | -2.45764600 | 2.62100400  | 0.13778800  |
| C  | -2.74961000 | 3.12766100  | -1.14096300 |
| C  | -4.06968600 | 3.33965500  | -1.53658700 |
| H  | -5.65150900 | 2.28832200  | 1.28304600  |
| H  | -3.31775800 | 1.92372800  | 1.99118900  |
| H  | -1.93956500 | 3.35711200  | -1.82675400 |
| H  | -4.27631500 | 3.74275700  | -2.52448000 |
| P  | -0.74009500 | 2.10700900  | 0.54639700  |
| C  | 0.11926500  | -5.98152300 | -0.61797200 |
| C  | -1.08731300 | -5.83040500 | 0.07084300  |
| C  | -1.60836700 | -4.55728900 | 0.29485800  |
| C  | -0.91922600 | -3.42442300 | -0.16423700 |
| C  | 0.29603600  | -3.58081700 | -0.84171600 |
| C  | 0.80836100  | -4.85747400 | -1.07150400 |
| H  | -1.62164700 | -6.70439000 | 0.43317100  |
| H  | -2.54641100 | -4.44033500 | 0.82876200  |
| H  | 0.84082200  | -2.69991800 | -1.16105900 |
| H  | 1.76018600  | -4.96977100 | -1.58171700 |
| C  | -4.57616300 | -1.26110300 | -3.49885200 |
| C  | -4.14245800 | -0.15313900 | -2.76863600 |
| C  | -3.24676400 | -0.32170300 | -1.71358400 |
| C  | -2.79223700 | -1.60061700 | -1.35814700 |
| C  | -3.23504000 | -2.70848300 | -2.09359600 |
| C  | -4.11833800 | -2.53605800 | -3.16011900 |
| H  | -4.48768800 | 0.84524700  | -3.01868200 |
| H  | -2.89221900 | 0.54399000  | -1.16876100 |
| H  | -2.87940900 | -3.70187300 | -1.84333600 |
| H  | -4.44819900 | -3.40129000 | -3.72870300 |
| C  | -3.92717700 | -1.56091900 | 3.98788300  |
| C  | -4.48354200 | -1.01012100 | 2.83283500  |
| C  | -3.82014600 | -1.11894500 | 1.60958300  |
| C  | -2.58476000 | -1.77500800 | 1.53150400  |
| C  | -2.02801300 | -2.32856200 | 2.69698200  |
| C  | -2.70079900 | -2.22677600 | 3.91385300  |
| H  | -5.43920700 | -0.49493800 | 2.88023000  |
| H  | -4.26108500 | -0.68301200 | 0.71969000  |
| H  | -1.06261000 | -2.82222300 | 2.64978100  |
| H  | -2.26225800 | -2.66406700 | 4.80685500  |
| P  | -1.56448400 | -1.72416700 | 0.00636600  |
| Cu | 0.03689800  | -0.06267800 | 0.10540500  |



|   |             |             |             |
|---|-------------|-------------|-------------|
| B | 2.40900300  | 0.04321800  | -1.65232700 |
| O | 3.06417200  | 0.37783000  | -2.82233200 |
| C | 2.24696600  | -0.07347400 | -3.92967000 |
| C | 0.81129300  | -0.09852200 | -3.30271500 |
| O | 1.11306600  | -0.42073100 | -1.91689400 |
| C | -0.11830100 | -1.16271500 | -3.87231100 |
| H | 0.26900200  | -2.16871500 | -3.69850600 |
| H | -1.10279500 | -1.09367900 | -3.40490100 |
| H | -0.24523600 | -1.01701000 | -4.95106200 |
| C | 0.12137700  | 1.26812600  | -3.29860700 |
| H | 0.77240800  | 2.04056200  | -2.87842500 |
| H | -0.18104700 | 1.56841600  | -4.30692800 |
| H | -0.77585100 | 1.20238800  | -2.67591800 |
| C | 2.74907600  | -1.46825300 | -4.31653700 |
| H | 3.81873900  | -1.40919500 | -4.53746300 |
| H | 2.61011100  | -2.17588800 | -3.49318800 |
| H | 2.23055700  | -1.85477400 | -5.19952700 |
| C | 2.42074000  | 0.90165400  | -5.08734800 |
| H | 1.75519300  | 0.63984400  | -5.91761500 |
| H | 2.20864200  | 1.92715100  | -4.77691900 |
| H | 3.45199500  | 0.86232000  | -5.45175100 |
| C | 1.99176000  | -0.24626800 | 0.76130600  |
| H | 2.07352800  | 0.49031900  | 1.56769500  |
| C | 2.20703800  | -1.61368300 | 1.28309800  |
| C | 1.54298500  | -2.01978000 | 2.46297600  |
| C | 1.65578100  | -3.31598000 | 2.95136400  |
| C | 2.44541600  | -4.26354100 | 2.28734500  |
| C | 3.13239500  | -3.87069200 | 1.14003800  |
| C | 3.01817300  | -2.57066000 | 0.64573500  |
| H | 0.92040000  | -1.29420700 | 2.98310100  |
| H | 1.12815900  | -3.59360600 | 3.86220400  |
| H | 2.52705400  | -5.27868400 | 2.66457500  |
| H | 3.76692400  | -4.58414900 | 0.61848200  |
| H | 3.56977700  | -2.28190700 | -0.24434300 |
| N | 2.90371200  | 0.15557200  | -0.33298300 |
| C | 4.18648800  | 0.66353500  | 0.00059900  |
| C | 4.74684200  | 0.40014800  | 1.26249600  |
| C | 4.90330800  | 1.49298400  | -0.88450700 |
| C | 5.98050600  | 0.94123300  | 1.62000900  |
| H | 4.22266000  | -0.24416800 | 1.95586500  |
| C | 6.13638800  | 2.02649900  | -0.51504600 |
| H | 4.49351100  | 1.71358600  | -1.86093000 |
| C | 6.68733900  | 1.76002400  | 0.73936000  |
| H | 6.39050400  | 0.71315800  | 2.60055600  |

|   |             |             |             |
|---|-------------|-------------|-------------|
| H | 6.66713800  | 2.66328500  | -1.21891300 |
| H | 7.64718600  | 2.18157600  | 1.02361400  |
| H | 0.52571000  | -6.97465600 | -0.78819700 |
| H | -4.44488200 | -1.47381500 | 4.93883800  |
| H | -6.15032700 | 3.18886600  | -0.98183600 |
| H | -0.60266500 | 2.27785400  | 6.26780300  |
| H | 2.66800100  | 6.40993100  | -1.06775800 |
| H | -5.26244100 | -1.13232400 | -4.33125800 |

**TS2<sup>OSS</sup>**

|   |             |             |             |
|---|-------------|-------------|-------------|
| C | 1.33809100  | 4.96962200  | -2.64518200 |
| C | 0.44559200  | 4.05406600  | -3.20659600 |
| C | -0.15816300 | 3.08231000  | -2.40945400 |
| C | 0.10792000  | 3.02926800  | -1.03120200 |
| C | 1.00233900  | 3.95386400  | -0.47262300 |
| C | 1.61565400  | 4.91484400  | -1.27793300 |
| H | 0.23017500  | 4.07973700  | -4.27065700 |
| H | -0.80643600 | 2.34151200  | -2.86493600 |
| H | 1.22947800  | 3.91870000  | 0.58689400  |
| H | 2.31073700  | 5.62209100  | -0.83353100 |
| C | 1.43046000  | 2.23729900  | 4.05613500  |
| C | 0.27918800  | 2.97368100  | 3.76306700  |
| C | -0.36600200 | 2.80526100  | 2.53830300  |
| C | 0.12523400  | 1.88524100  | 1.59985400  |
| C | 1.26932300  | 1.13545400  | 1.90773000  |
| C | 1.92367100  | 1.32218400  | 3.12515000  |
| H | -0.11173400 | 3.68491900  | 4.48548600  |
| H | -1.25394500 | 3.38527000  | 2.30848700  |
| H | 1.63869600  | 0.39450700  | 1.20933700  |
| H | 2.81804700  | 0.74649500  | 3.33769500  |
| C | -5.08827300 | 2.73854900  | 0.64330100  |
| C | -4.45212300 | 1.76579800  | 1.41767900  |
| C | -3.10927100 | 1.47264500  | 1.20418700  |
| C | -2.37556000 | 2.15982900  | 0.22260900  |
| C | -3.01787200 | 3.13559500  | -0.54707500 |
| C | -4.36949900 | 3.41940300  | -0.33804800 |
| H | -5.00776200 | 1.21570500  | 2.17053400  |
| H | -2.62980400 | 0.70457300  | 1.80272800  |
| H | -2.46538500 | 3.67827800  | -1.30631700 |
| H | -4.85661700 | 4.17874600  | -0.94362900 |
| P | -0.63366700 | 1.65713200  | -0.05720900 |
| C | -1.65864300 | -6.02649800 | -2.42702100 |
| C | -1.06693200 | -5.92854400 | -1.16836000 |
| C | -1.19408900 | -4.75720000 | -0.42308800 |

|    |             |             |             |
|----|-------------|-------------|-------------|
| C  | -1.91799900 | -3.66586300 | -0.92831500 |
| C  | -2.51012800 | -3.77236600 | -2.19631600 |
| C  | -2.38185700 | -4.94623600 | -2.93616100 |
| H  | -0.48825200 | -6.75637900 | -0.76916600 |
| H  | -0.71139400 | -4.69459700 | 0.54676400  |
| H  | -3.05150000 | -2.93055500 | -2.61408200 |
| H  | -2.83947700 | -5.01010700 | -3.91925300 |
| C  | -6.23220500 | -0.43699600 | -0.67607300 |
| C  | -5.97203200 | -1.33517100 | 0.36112700  |
| C  | -4.68319700 | -1.83129700 | 0.55308600  |
| C  | -3.63774600 | -1.42814400 | -0.28872200 |
| C  | -3.90361500 | -0.51492800 | -1.31921700 |
| C  | -5.19589100 | -0.03037300 | -1.51569500 |
| H  | -6.77395200 | -1.65126900 | 1.02312200  |
| H  | -4.49462600 | -2.51949200 | 1.36928000  |
| H  | -3.09688000 | -0.18374600 | -1.96433000 |
| H  | -5.38271400 | 0.68138600  | -2.31401800 |
| C  | -1.62282800 | -2.69582200 | 4.47847500  |
| C  | -2.29547400 | -3.64594800 | 3.70369000  |
| C  | -2.36996900 | -3.49742000 | 2.31890200  |
| C  | -1.76006100 | -2.40054500 | 1.68743300  |
| C  | -1.04748800 | -1.48221400 | 2.47039500  |
| C  | -0.99633800 | -1.61395400 | 3.85862600  |
| H  | -2.76967400 | -4.49934700 | 4.18034800  |
| H  | -2.89703100 | -4.23655100 | 1.72398400  |
| H  | -0.52769200 | -0.66231200 | 1.99231100  |
| H  | -0.45813400 | -0.87350900 | 4.44284300  |
| P  | -1.90462200 | -2.02439200 | -0.10579100 |
| Cu | -0.27053600 | -0.49183200 | -0.97347700 |
| H  | -1.54782800 | -6.93448100 | -3.01258600 |
| H  | -1.57948900 | -2.80758800 | 5.55829300  |
| H  | -6.14058600 | 2.95737200  | 0.80039700  |
| H  | 1.93774600  | 2.37658300  | 5.00695600  |
| H  | 1.81887100  | 5.71679500  | -3.27040500 |
| H  | -7.23694700 | -0.04939600 | -0.82102700 |
| I  | -0.79748400 | -0.42386200 | -3.64367900 |
| C  | 2.81399900  | 2.56871200  | -5.96899600 |
| H  | 3.90755000  | 2.65075600  | -5.92315700 |
| H  | 2.40606400  | 3.13274200  | -5.12158400 |
| H  | 2.48038500  | 3.05758400  | -6.89172300 |
| C  | 2.36630900  | 1.10637500  | -5.91151300 |
| H  | 1.27403200  | 1.04486900  | -5.99376000 |
| H  | 2.77852800  | 0.55604600  | -6.76885600 |
| C  | 2.78761500  | 0.42109600  | -4.60895900 |

|   |            |             |             |
|---|------------|-------------|-------------|
| H | 2.35916300 | 0.96637200  | -3.75414000 |
| H | 3.88205100 | 0.52763000  | -4.46467700 |
| C | 2.40066300 | -1.00138300 | -4.50241000 |
| H | 2.47468900 | -1.53087600 | -3.56273700 |
| H | 2.08469300 | -1.57006800 | -5.37064400 |
| B | 2.28367300 | -3.00271200 | 1.06139200  |
| O | 2.39452200 | -2.04584200 | 2.03912400  |
| C | 3.11692500 | -2.65594200 | 3.14969500  |
| C | 2.83693400 | -4.18251700 | 2.92484600  |
| O | 2.66729800 | -4.25091500 | 1.48193200  |
| C | 1.62234800 | -2.73830200 | -0.34647600 |
| H | 0.57443700 | -2.96885500 | -0.11960500 |
| C | 1.97432600 | -3.67383100 | -1.50455700 |
| C | 3.03961000 | -4.58080800 | -1.48087000 |
| C | 3.28298500 | -5.41834100 | -2.57199400 |
| C | 2.46547500 | -5.36041400 | -3.70058200 |
| C | 1.39870600 | -4.46009900 | -3.72982500 |
| C | 1.15648400 | -3.62684300 | -2.64096100 |
| H | 3.66792500 | -4.65749400 | -0.60047800 |
| H | 4.11438000 | -6.11763900 | -2.53552400 |
| H | 2.65670300 | -6.01311500 | -4.54829600 |
| H | 0.74715400 | -4.40249000 | -4.59688200 |
| H | 0.33145900 | -2.92593600 | -2.67868300 |
| C | 3.97346300 | -5.11300500 | 3.32716300  |
| H | 4.17439500 | -5.03489000 | 4.40151100  |
| H | 3.69659500 | -6.14860700 | 3.10720900  |
| H | 4.89174700 | -4.88389900 | 2.78208800  |
| C | 1.51077800 | -4.64974600 | 3.53298100  |
| H | 0.68979700 | -3.98438200 | 3.25283000  |
| H | 1.28514700 | -5.65066800 | 3.15302700  |
| H | 1.56010700 | -4.69782900 | 4.62537200  |
| C | 2.58144600 | -2.11462400 | 4.46834100  |
| H | 3.05130100 | -2.63742400 | 5.30916000  |
| H | 2.81022900 | -1.05029600 | 4.56275900  |
| H | 1.50032300 | -2.23513500 | 4.53834300  |
| C | 4.58775400 | -2.27209400 | 2.96718400  |
| H | 4.66672000 | -1.18170700 | 2.92377200  |
| H | 5.20445000 | -2.63421300 | 3.79575500  |
| H | 4.98810400 | -2.67055700 | 2.03027700  |
| N | 1.59579000 | -1.32196800 | -0.73815000 |
| C | 2.77302000 | -0.68584600 | -0.95565500 |
| C | 4.06346600 | -1.29038100 | -0.86491200 |
| C | 2.72779600 | 0.70266900  | -1.27783200 |
| C | 5.21073100 | -0.53731000 | -1.05882300 |

|   |            |             |             |
|---|------------|-------------|-------------|
| H | 4.15088100 | -2.35047200 | -0.66863300 |
| C | 3.88183500 | 1.44628700  | -1.44928800 |
| H | 1.75687300 | 1.16269100  | -1.39346400 |
| C | 5.13718700 | 0.83428000  | -1.34478000 |
| H | 6.18121100 | -1.02189100 | -0.99112800 |
| H | 3.79896200 | 2.50324400  | -1.68570000 |
| H | 6.04530800 | 1.41194600  | -1.48855800 |

**IM4**

|   |             |             |             |
|---|-------------|-------------|-------------|
| C | 5.84635400  | 2.94065600  | 1.26787100  |
| C | 5.26198500  | 3.70607300  | 0.25363100  |
| C | 3.96139600  | 3.43483300  | -0.16500500 |
| C | 3.23010800  | 2.39447800  | 0.43191200  |
| C | 3.81864800  | 1.63261400  | 1.44918100  |
| C | 5.12431600  | 1.90681400  | 1.86337700  |
| H | 5.82262300  | 4.51136600  | -0.21316200 |
| H | 3.51346400  | 4.02400300  | -0.95926400 |
| H | 3.26203300  | 0.81942400  | 1.90640500  |
| H | 5.57168200  | 1.30423300  | 2.64866200  |
| C | -1.16346600 | 5.28320500  | 1.80200000  |
| C | 0.20299100  | 5.27515900  | 2.08011400  |
| C | 1.03651200  | 4.32454300  | 1.48718200  |
| C | 0.50508200  | 3.36353800  | 0.61914600  |
| C | -0.87612900 | 3.36518700  | 0.35647200  |
| C | -1.69824500 | 4.33038900  | 0.93213200  |
| H | 0.62570300  | 6.01088300  | 2.75881500  |
| H | 2.09875100  | 4.32680100  | 1.70609600  |
| H | -1.30611300 | 2.59720700  | -0.27855400 |
| H | -2.76438400 | 4.32524600  | 0.72618900  |
| C | 1.84790600  | 2.87629500  | -4.63533800 |
| C | 0.96166500  | 3.63146900  | -3.86899500 |
| C | 0.83816500  | 3.39651500  | -2.49695000 |
| C | 1.59779900  | 2.39552400  | -1.88165400 |
| C | 2.48118500  | 1.63304200  | -2.66379200 |
| C | 2.61022200  | 1.87624900  | -4.02705900 |
| H | 0.36917400  | 4.41524600  | -4.33377400 |
| H | 0.15956100  | 4.00301700  | -1.90765000 |
| H | 3.07162600  | 0.84632600  | -2.20399000 |
| H | 3.28941500  | 1.27033900  | -4.61839800 |
| P | 1.51404900  | 2.00314200  | -0.08513700 |
| C | -2.00766800 | -5.23161300 | -0.71485100 |
| C | -1.10487300 | -4.88893200 | 0.29294100  |
| C | -0.20937600 | -3.83840200 | 0.10778400  |
| C | -0.19487700 | -3.12963300 | -1.10527600 |

|    |             |             |             |
|----|-------------|-------------|-------------|
| C  | -1.09725400 | -3.48295700 | -2.11876400 |
| C  | -2.00180000 | -4.52755300 | -1.91942200 |
| H  | -1.12197800 | -5.41441200 | 1.24205100  |
| H  | 0.46057300  | -3.54586000 | 0.91120800  |
| H  | -1.09860200 | -2.93946500 | -3.05781000 |
| H  | -2.70253700 | -4.78896800 | -2.70805500 |
| C  | 5.22489100  | -3.35993000 | -1.28958000 |
| C  | 4.96141400  | -2.08297100 | -0.79056400 |
| C  | 3.65290600  | -1.60399100 | -0.75734500 |
| C  | 2.59839300  | -2.39036100 | -1.24196600 |
| C  | 2.86660800  | -3.67790100 | -1.72550800 |
| C  | 4.17598700  | -4.15908500 | -1.75000400 |
| H  | 5.76851400  | -1.46614400 | -0.40575100 |
| H  | 3.44347600  | -0.63276800 | -0.32223700 |
| H  | 2.04838300  | -4.30393600 | -2.06904800 |
| H  | 4.37653100  | -5.15984700 | -2.12265000 |
| C  | 0.19801400  | -0.13897400 | -5.54774700 |
| C  | 1.11111500  | -1.17396700 | -5.34159200 |
| C  | 1.34532400  | -1.65412500 | -4.05251700 |
| C  | 0.66479300  | -1.10481500 | -2.95796800 |
| C  | -0.24821900 | -0.06134500 | -3.17159000 |
| C  | -0.47863100 | 0.41561800  | -4.46049000 |
| H  | 1.64628800  | -1.60526900 | -6.18332200 |
| H  | 2.06611000  | -2.44970500 | -3.89545000 |
| H  | -0.76386300 | 0.38949700  | -2.33005200 |
| H  | -1.15761700 | 1.24874100  | -4.61263400 |
| P  | 0.91550800  | -1.67353800 | -1.22889200 |
| Cu | 0.61522100  | -0.10261200 | 0.50793500  |
| H  | -2.72175900 | -6.03412300 | -0.55494100 |
| H  | 0.02633000  | 0.24482200  | -6.54965600 |
| H  | 1.94093200  | 3.05903700  | -5.70208500 |
| H  | -1.81099600 | 6.02126900  | 2.26670500  |
| H  | 6.86331200  | 3.15085300  | 1.58793200  |
| H  | 6.24313800  | -3.73859300 | -1.30557600 |
| I  | 1.72082300  | -1.39793200 | 2.62555100  |
| B  | -3.30938600 | 0.14488800  | -0.40414100 |
| O  | -4.67253500 | 0.19289400  | -0.29947300 |
| C  | -5.11954400 | 1.37899100  | -1.02393600 |
| C  | -3.94672000 | 1.59780200  | -2.04286900 |
| O  | -2.81028800 | 1.04513000  | -1.31520800 |
| C  | -2.32039000 | -0.80615100 | 0.39401500  |
| H  | -1.73893300 | -1.29996400 | -0.39217900 |
| C  | -2.92050800 | -1.93184700 | 1.22683700  |
| C  | -4.06036900 | -2.61176700 | 0.78329700  |

|   |             |             |             |
|---|-------------|-------------|-------------|
| C | -4.54615600 | -3.71472700 | 1.48524800  |
| C | -3.90126200 | -4.14994500 | 2.64400200  |
| C | -2.76239200 | -3.47702600 | 3.08894600  |
| C | -2.26985000 | -2.38012200 | 2.38289800  |
| H | -4.57218800 | -2.27881300 | -0.11348900 |
| H | -5.43259900 | -4.23143500 | 1.12656900  |
| H | -4.28266900 | -5.00643700 | 3.19353200  |
| H | -2.24157300 | -3.81139700 | 3.98203200  |
| H | -1.35993000 | -1.89131200 | 2.71441300  |
| C | -4.10450300 | 0.76055200  | -3.31516500 |
| H | -3.16922800 | 0.77727000  | -3.87800000 |
| H | -4.32966900 | -0.28288600 | -3.07426400 |
| H | -4.90314100 | 1.15094900  | -3.95355600 |
| C | -3.63414800 | 3.04747500  | -2.38881600 |
| H | -3.40052900 | 3.63644800  | -1.50011500 |
| H | -2.76392600 | 3.08397700  | -3.05220900 |
| H | -4.47988300 | 3.51272400  | -2.90679600 |
| C | -5.24038800 | 2.50125500  | 0.00994000  |
| H | -5.61138800 | 3.42480800  | -0.44566600 |
| H | -5.94354200 | 2.19299700  | 0.78913200  |
| H | -4.27936100 | 2.70189900  | 0.49066500  |
| C | -6.47551000 | 1.08089700  | -1.64968700 |
| H | -6.81345700 | 1.92728600  | -2.25787600 |
| H | -6.44227200 | 0.18888700  | -2.27808800 |
| H | -7.21411800 | 0.91255600  | -0.86029900 |
| N | -1.34683600 | 0.02857900  | 1.11190100  |
| C | -1.77741000 | 0.77762100  | 2.16411700  |
| C | -3.14384500 | 0.92350100  | 2.54752100  |
| C | -0.79898100 | 1.49990700  | 2.90693100  |
| C | -3.49674100 | 1.80506700  | 3.55763200  |
| H | -3.91443600 | 0.35325700  | 2.04671700  |
| C | -1.16721200 | 2.36321400  | 3.92210200  |
| H | 0.24291700  | 1.33680000  | 2.66575700  |
| C | -2.51921800 | 2.53699500  | 4.24545900  |
| H | -4.54433100 | 1.91908500  | 3.82236900  |
| H | -0.40122500 | 2.91198900  | 4.46048200  |
| H | -2.80862500 | 3.22310600  | 5.03610200  |

#### IM5

|   |            |            |             |
|---|------------|------------|-------------|
| C | 2.63187100 | 2.55762100 | 2.27842000  |
| C | 3.41564100 | 1.65920600 | 1.55513000  |
| C | 3.24507800 | 1.52154900 | 0.17515500  |
| C | 2.29098400 | 2.29441200 | -0.49369000 |
| C | 1.51050300 | 3.20541600 | 0.23920900  |

|    |             |             |             |
|----|-------------|-------------|-------------|
| C  | 1.67772200  | 3.33527900  | 1.61467700  |
| H  | 4.16580600  | 1.06004700  | 2.06389400  |
| H  | 3.84374300  | 0.80505600  | -0.37462900 |
| H  | 0.76316200  | 3.80758700  | -0.27188300 |
| H  | 1.06152500  | 4.03634700  | 2.16990000  |
| C  | 3.23851400  | 6.25557200  | -3.93988000 |
| C  | 3.96348200  | 5.66730300  | -2.89981400 |
| C  | 3.57733800  | 4.42753900  | -2.39478800 |
| C  | 2.46244800  | 3.76235000  | -2.93026800 |
| C  | 1.73620600  | 4.35913300  | -3.96928800 |
| C  | 2.12727200  | 5.60133800  | -4.47208300 |
| H  | 4.82672300  | 6.17640000  | -2.48031900 |
| H  | 4.13478400  | 3.97674500  | -1.57921300 |
| H  | 0.87719700  | 3.84707800  | -4.38979800 |
| H  | 1.55922000  | 6.05578200  | -5.27857800 |
| C  | 4.90790300  | -1.04072800 | -3.86521000 |
| C  | 3.81919000  | -1.40258300 | -3.06778400 |
| C  | 2.94041400  | -0.42991800 | -2.59530800 |
| C  | 3.16100300  | 0.92364200  | -2.90391100 |
| C  | 4.25014700  | 1.28349000  | -3.70547200 |
| C  | 5.11870400  | 0.30112100  | -4.18484600 |
| H  | 3.64142800  | -2.44652000 | -2.82360900 |
| H  | 2.09606500  | -0.71492900 | -1.97789600 |
| H  | 4.41621200  | 2.32439400  | -3.96137400 |
| H  | 5.95894200  | 0.58680200  | -4.81147000 |
| P  | 1.93495500  | 2.13303700  | -2.28791600 |
| Cu | -0.15850600 | 1.09005900  | -2.88579200 |
| H  | 5.58505600  | -1.80221100 | -4.24205400 |
| H  | 3.53895200  | 7.22381600  | -4.33055700 |
| H  | 2.76169500  | 2.65413800  | 3.35247100  |
| I  | -0.15644500 | 1.26058800  | -5.51511700 |
| C  | -5.49766300 | -1.93249500 | -1.35290700 |
| H  | -4.83835100 | -2.06979800 | -0.48828600 |
| H  | -6.04016400 | -2.86949000 | -1.52121400 |
| H  | -6.22995300 | -1.15983000 | -1.08960300 |
| C  | -4.68473800 | -1.53077500 | -2.58591600 |
| H  | -3.96363000 | -2.32267300 | -2.82091400 |
| H  | -5.34480100 | -1.43039200 | -3.45854500 |
| C  | -3.92581600 | -0.22201800 | -2.35128800 |
| H  | -3.31703600 | -0.31918700 | -1.45052700 |
| H  | -4.62113200 | 0.60578800  | -2.17041200 |
| C  | -3.01016700 | 0.12151500  | -3.54024300 |
| H  | -3.58021100 | 0.42678700  | -4.42680000 |
| H  | -2.38447500 | -0.72759400 | -3.81378200 |



|   |             |             |             |
|---|-------------|-------------|-------------|
| O | -2.40656300 | 2.41274900  | -2.90308900 |
| C | -2.14546100 | 1.28908100  | -3.17833600 |
| B | 0.40904900  | -0.94811900 | 0.72302500  |
| O | 1.65247000  | -1.30108600 | 0.26639100  |
| C | 2.10005000  | -2.44664400 | 1.03428000  |
| C | 1.23456900  | -2.32470900 | 2.34407000  |
| O | 0.06038000  | -1.59340500 | 1.87929800  |
| C | -0.43041500 | 0.13122700  | -0.07737200 |
| H | 0.21079100  | 1.01770000  | -0.02521600 |
| C | -1.77808800 | 0.58263500  | 0.47433800  |
| C | -2.22829600 | 1.86205700  | 0.11934000  |
| C | -3.48448300 | 2.32399800  | 0.50600000  |
| C | -4.31514500 | 1.51370900  | 1.28267900  |
| C | -3.86203900 | 0.25824200  | 1.68798900  |
| C | -2.60205100 | -0.19894100 | 1.29537200  |
| H | -1.58749800 | 2.49606800  | -0.48540200 |
| H | -3.81305900 | 3.31386200  | 0.20146900  |
| H | -5.29877700 | 1.86446200  | 1.58246500  |
| H | -4.48782800 | -0.36937000 | 2.31688300  |
| H | -2.24813300 | -1.15804300 | 1.65524700  |
| C | 0.76911500  | -3.65088400 | 2.93126300  |
| H | 1.62656600  | -4.26003100 | 3.23817600  |
| H | 0.14891900  | -3.46622500 | 3.81392400  |
| H | 0.17714600  | -4.21879100 | 2.21059600  |
| C | 1.88168300  | -1.45187100 | 3.42179600  |
| H | 2.19584700  | -0.48908800 | 3.00821800  |
| H | 1.14667400  | -1.25901600 | 4.20891100  |
| H | 2.75034800  | -1.94389100 | 3.87134800  |
| C | 3.60577500  | -2.32288300 | 1.23818400  |
| H | 3.98761300  | -3.15061000 | 1.84591500  |
| H | 4.10498700  | -2.35384300 | 0.26455300  |
| H | 3.86920300  | -1.38082900 | 1.72233500  |
| C | 1.77901000  | -3.68793900 | 0.19658200  |
| H | 2.27770800  | -3.59490900 | -0.77307400 |
| H | 2.13326500  | -4.60284800 | 0.68231000  |
| H | 0.70669900  | -3.77663900 | 0.00578000  |
| N | -0.40287500 | -0.25297700 | -1.50669000 |
| C | -0.78596000 | -1.52867600 | -1.87394800 |
| C | -1.50361300 | -2.42590600 | -1.04574400 |
| C | -0.40091200 | -2.00656200 | -3.15431100 |
| C | -1.81030800 | -3.71624900 | -1.47629000 |
| H | -1.83970900 | -2.10927100 | -0.07091600 |
| C | -0.73239100 | -3.28525200 | -3.58117100 |
| H | 0.16811900  | -1.35058100 | -3.80511000 |

|   |             |             |             |
|---|-------------|-------------|-------------|
| C | -1.43874200 | -4.15960800 | -2.74606700 |
| H | -2.36376400 | -4.37436800 | -0.81070400 |
| H | -0.42122900 | -3.60831900 | -4.57112800 |
| H | -1.68874800 | -5.16240000 | -3.07870800 |

**TS3**

|    |             |             |             |
|----|-------------|-------------|-------------|
| C  | 2.53983300  | 2.62534800  | 2.24758200  |
| C  | 3.38499900  | 1.75538000  | 1.55895500  |
| C  | 3.25005800  | 1.58243900  | 0.17924800  |
| C  | 2.27146200  | 2.29155100  | -0.52358800 |
| C  | 1.42816000  | 3.17295100  | 0.17395500  |
| C  | 1.55960800  | 3.33796300  | 1.55004000  |
| H  | 4.15436400  | 1.20684800  | 2.09546300  |
| H  | 3.89683800  | 0.88939000  | -0.34627600 |
| H  | 0.66093800  | 3.72431300  | -0.36464100 |
| H  | 0.89524600  | 4.01481600  | 2.07903800  |
| C  | 3.40146500  | 6.14584900  | -4.05136300 |
| C  | 3.99226200  | 5.64754400  | -2.88729900 |
| C  | 3.56892300  | 4.43095900  | -2.35525900 |
| C  | 2.54999000  | 3.70008000  | -2.98708400 |
| C  | 1.95722300  | 4.20660400  | -4.15179400 |
| C  | 2.38594900  | 5.42494500  | -4.68052600 |
| H  | 4.78018700  | 6.20814500  | -2.39204900 |
| H  | 4.02307000  | 4.04973500  | -1.44585300 |
| H  | 1.16945500  | 3.64638300  | -4.64440600 |
| H  | 1.92025800  | 5.80982500  | -5.58313600 |
| C  | 5.05639700  | -1.10990700 | -3.64769200 |
| C  | 3.85224700  | -1.47018200 | -3.03760100 |
| C  | 2.94287200  | -0.48900400 | -2.64706000 |
| C  | 3.24243600  | 0.86759000  | -2.85377600 |
| C  | 4.44844900  | 1.22607000  | -3.46777600 |
| C  | 5.35103300  | 0.23722200  | -3.86304700 |
| H  | 3.61097100  | -2.51740600 | -2.87758000 |
| H  | 2.01675500  | -0.77024900 | -2.15938500 |
| H  | 4.67941400  | 2.27157700  | -3.64312700 |
| H  | 6.28301900  | 0.52120100  | -4.34364800 |
| P  | 1.98734900  | 2.08909400  | -2.32515700 |
| Cu | -0.10568900 | 1.09073000  | -2.92373000 |
| H  | 5.75937600  | -1.87664100 | -3.96116300 |
| H  | 3.73023200  | 7.09603400  | -4.46300900 |
| H  | 2.64212000  | 2.74947800  | 3.32174500  |
| I  | -0.30202200 | 1.26482700  | -5.53581100 |
| C  | -5.65890600 | -1.90099200 | -1.35174100 |
| H  | -5.03702500 | -2.04625300 | -0.46071100 |

|   |             |             |             |
|---|-------------|-------------|-------------|
| H | -6.20509800 | -2.83143600 | -1.54265000 |
| H | -6.39255000 | -1.12030500 | -1.11753400 |
| C | -4.79194200 | -1.50768000 | -2.55037100 |
| H | -4.07890100 | -2.31292500 | -2.76506300 |
| H | -5.41599000 | -1.38661500 | -3.44638400 |
| C | -4.01316500 | -0.21898600 | -2.27501600 |
| H | -3.43871100 | -0.34042100 | -1.35464700 |
| H | -4.69521900 | 0.62275800  | -2.10691700 |
| C | -3.04991300 | 0.12050400  | -3.42826100 |
| H | -3.57679700 | 0.49699700  | -4.31336900 |
| H | -2.46590800 | -0.74855000 | -3.72831400 |
| O | -2.33228600 | 2.33535500  | -2.64724300 |
| C | -2.13528900 | 1.22039200  | -2.99590500 |
| B | 0.35323000  | -0.88069400 | 0.64871300  |
| O | 1.59160500  | -1.18469800 | 0.14738000  |
| C | 2.09952000  | -2.33131900 | 0.87680300  |
| C | 1.26765000  | -2.26785300 | 2.21240300  |
| O | 0.06017800  | -1.56137200 | 1.79977500  |
| C | -0.55694400 | 0.18153200  | -0.09981100 |
| H | 0.05227200  | 1.09086900  | -0.06924600 |
| C | -1.88617500 | 0.57063000  | 0.54202400  |
| C | -2.37574600 | 1.86413900  | 0.31027800  |
| C | -3.61594500 | 2.27229800  | 0.79767700  |
| C | -4.39053100 | 1.39337700  | 1.55646600  |
| C | -3.89481500 | 0.12165700  | 1.84456100  |
| C | -2.65207600 | -0.28074300 | 1.35157500  |
| H | -1.77983300 | 2.55402500  | -0.27720700 |
| H | -3.97466500 | 3.27599600  | 0.58637300  |
| H | -5.36086800 | 1.70269500  | 1.93483200  |
| H | -4.47186100 | -0.56062600 | 2.46309900  |
| H | -2.26258600 | -1.25254600 | 1.62995000  |
| C | 0.85799200  | -3.62181700 | 2.77802000  |
| H | 1.74117700  | -4.21298100 | 3.04436700  |
| H | 0.25894300  | -3.47747000 | 3.68249600  |
| H | 0.26156500  | -4.18826400 | 2.05992300  |
| C | 1.91901300  | -1.40377200 | 3.29470500  |
| H | 2.19290500  | -0.42185100 | 2.89828800  |
| H | 1.20142700  | -1.25358100 | 4.10681400  |
| H | 2.81433200  | -1.88087200 | 3.70647000  |
| C | 3.60551000  | -2.16264100 | 1.04367100  |
| H | 4.02797100  | -2.99118200 | 1.62280800  |
| H | 4.07989700  | -2.15575700 | 0.05738000  |
| H | 3.85163500  | -1.22407300 | 1.54302900  |
| C | 1.79753400  | -3.56558800 | 0.02151500  |

|   |             |             |             |
|---|-------------|-------------|-------------|
| H | 2.26709400  | -3.43745400 | -0.95822400 |
| H | 2.19585300  | -4.47687900 | 0.47926000  |
| H | 0.72442400  | -3.68826100 | -0.14299000 |
| N | -0.58087000 | -0.19656200 | -1.53343000 |
| C | -0.87446600 | -1.49925700 | -1.89686300 |
| C | -1.57036300 | -2.41785500 | -1.07546900 |
| C | -0.43624900 | -1.97576600 | -3.15900200 |
| C | -1.80122300 | -3.72869700 | -1.49175400 |
| H | -1.95086000 | -2.10162100 | -0.11753900 |
| C | -0.69367200 | -3.27583500 | -3.57448200 |
| H | 0.10683400  | -1.30102900 | -3.81314400 |
| C | -1.37450900 | -4.17298900 | -2.74350700 |
| H | -2.33871200 | -4.40277800 | -0.82899900 |
| H | -0.34382600 | -3.59522300 | -4.55263100 |
| H | -1.56562200 | -5.19185900 | -3.06609100 |

### IM6

|   |             |             |             |
|---|-------------|-------------|-------------|
| C | 0.36350600  | 4.93622700  | 1.30100000  |
| C | 1.75007700  | 4.80751400  | 1.20076500  |
| C | 2.31017200  | 4.07021100  | 0.15764800  |
| C | 1.48389400  | 3.46146000  | -0.79733500 |
| C | 0.09048700  | 3.57435100  | -0.67797600 |
| C | -0.46357900 | 4.31461000  | 0.36501500  |
| H | 2.39630100  | 5.27747100  | 1.93722700  |
| H | 3.38773900  | 3.95835800  | 0.09373400  |
| H | -0.55333000 | 3.05554100  | -1.38041500 |
| H | -1.54282800 | 4.38364400  | 0.45917900  |
| C | 3.53774200  | 5.56834600  | -5.40024800 |
| C | 3.30057300  | 6.01363000  | -4.09901300 |
| C | 2.86578400  | 5.11920400  | -3.11924600 |
| C | 2.66586600  | 3.77048200  | -3.43994600 |
| C | 2.89107600  | 3.32934700  | -4.75411900 |
| C | 3.33164000  | 4.22552400  | -5.72622600 |
| H | 3.45091900  | 7.05925500  | -3.84476300 |
| H | 2.67519100  | 5.47100200  | -2.11035600 |
| H | 2.71431400  | 2.28721000  | -5.01052200 |
| H | 3.50451900  | 3.87629500  | -6.74010600 |
| C | 6.03477600  | 0.60519200  | -0.62052500 |
| C | 4.86647200  | -0.14883100 | -0.73888600 |
| C | 3.70638400  | 0.43265100  | -1.25023000 |
| C | 3.70198400  | 1.78248500  | -1.62951200 |
| C | 4.88545900  | 2.52888200  | -1.53132700 |
| C | 6.04514300  | 1.94220500  | -1.02533600 |
| H | 4.85393300  | -1.19449200 | -0.44924000 |

|    |             |             |             |
|----|-------------|-------------|-------------|
| H  | 2.81841000  | -0.17728900 | -1.37370600 |
| H  | 4.90173900  | 3.56221500  | -1.86522900 |
| H  | 6.95853300  | 2.52623900  | -0.95415400 |
| P  | 2.13017400  | 2.51170900  | -2.22276000 |
| Cu | 0.73590700  | 1.00480300  | -3.14068200 |
| H  | 6.94020700  | 0.14969800  | -0.22909400 |
| H  | 3.87431100  | 6.26712400  | -6.16097100 |
| H  | -0.07102500 | 5.50500400  | 2.11842300  |
| I  | 0.97972100  | -0.95050900 | -4.77945900 |
| C  | -6.91884200 | 0.25028000  | -2.22991600 |
| H  | -6.99549000 | -0.39670500 | -1.34742500 |
| H  | -7.83597500 | 0.12604400  | -2.81610400 |
| H  | -6.88431400 | 1.28852800  | -1.87813600 |
| C  | -5.67710800 | -0.09236800 | -3.05661000 |
| H  | -5.74731000 | -1.12701000 | -3.41917400 |
| H  | -5.63837700 | 0.54504900  | -3.95025300 |
| C  | -4.37821300 | 0.07249000  | -2.26310300 |
| H  | -4.41445700 | -0.56908600 | -1.37294200 |
| H  | -4.28863500 | 1.10675500  | -1.90558000 |
| C  | -3.13253500 | -0.28127900 | -3.09650500 |
| H  | -3.07884200 | 0.35378500  | -3.98443800 |
| H  | -3.18854300 | -1.32184700 | -3.42478200 |
| O  | -1.28187500 | 1.07305700  | -2.40247800 |
| C  | -1.86693800 | -0.02410400 | -2.31222900 |
| B  | 0.51126200  | -2.02318200 | -0.13770700 |
| O  | 1.80653700  | -2.29884100 | -0.47841500 |
| C  | 2.10433500  | -3.62982600 | 0.04147900  |
| C  | 1.05355100  | -3.77214100 | 1.20264200  |
| O  | -0.02581800 | -2.90221500 | 0.75495900  |
| C  | -0.20579800 | -0.71211600 | -0.67103300 |
| H  | 0.51400900  | -0.24016100 | -1.35422800 |
| C  | -0.41470300 | 0.22740200  | 0.50533000  |
| C  | 0.72052800  | 0.72172100  | 1.16383300  |
| C  | 0.59280200  | 1.53861500  | 2.28372100  |
| C  | -0.67390800 | 1.87867200  | 2.76186700  |
| C  | -1.80682100 | 1.40034700  | 2.10485900  |
| C  | -1.67763500 | 0.57814700  | 0.98367200  |
| H  | 1.70972900  | 0.47444800  | 0.78669800  |
| H  | 1.48267600  | 1.92906300  | 2.76767300  |
| H  | -0.77515500 | 2.52376200  | 3.62977700  |
| H  | -2.79774600 | 1.66810300  | 2.46203800  |
| H  | -2.56345700 | 0.21874700  | 0.47073000  |
| C  | 0.48788400  | -5.17427700 | 1.38823800  |
| H  | 1.28222900  | -5.88288200 | 1.64787500  |

|   |             |             |             |
|---|-------------|-------------|-------------|
| H | -0.24421700 | -5.16885300 | 2.20161800  |
| H | -0.01516100 | -5.52078900 | 0.48332900  |
| C | 1.53994400  | -3.19750000 | 2.53543100  |
| H | 1.92635300  | -2.18149700 | 2.40835300  |
| H | 0.69532100  | -3.15054000 | 3.22880500  |
| H | 2.32253500  | -3.81951000 | 2.98129800  |
| C | 3.56119400  | -3.66396000 | 0.48360900  |
| H | 3.79957800  | -4.62360100 | 0.95532400  |
| H | 4.21061900  | -3.54635100 | -0.38947400 |
| H | 3.78579000  | -2.86201800 | 1.19038900  |
| C | 1.86980300  | -4.60195800 | -1.11737100 |
| H | 2.47949400  | -4.28771100 | -1.96936900 |
| H | 2.14739700  | -5.62501600 | -0.84356300 |
| H | 0.82305800  | -4.59379400 | -1.43286600 |
| N | -1.42245100 | -0.98363100 | -1.45442600 |
| C | -1.93776700 | -2.32757300 | -1.47667800 |
| C | -2.81111400 | -2.75797100 | -0.47788000 |
| C | -1.49418600 | -3.20979600 | -2.46565500 |
| C | -3.25093800 | -4.08102800 | -0.47070700 |
| H | -3.11106800 | -2.06725300 | 0.30248200  |
| C | -1.94162400 | -4.53155100 | -2.45443700 |
| H | -0.80463200 | -2.84923600 | -3.22469600 |
| C | -2.81711200 | -4.96892000 | -1.45750300 |
| H | -3.92543700 | -4.41987900 | 0.31012500  |
| H | -1.60258300 | -5.21778900 | -3.22500700 |
| H | -3.16134900 | -5.99921700 | -1.44974600 |

**IM7**

|   |            |             |             |
|---|------------|-------------|-------------|
| C | 6.97063600 | 0.43796600  | 4.91943500  |
| C | 8.30181700 | 0.53196300  | 4.51085600  |
| C | 8.63038300 | 0.41518000  | 3.15940600  |
| C | 7.62531000 | 0.20837000  | 2.20602400  |
| C | 6.29159400 | 0.10262000  | 2.62699700  |
| C | 5.96506800 | 0.22111400  | 3.97547900  |
| H | 9.08712700 | 0.69127900  | 5.24478200  |
| H | 9.66832800 | 0.47312900  | 2.84686100  |
| H | 5.51343900 | -0.09143600 | 1.89336300  |
| H | 4.93105800 | 0.12340200  | 4.29150800  |
| C | 8.08353200 | 4.35390800  | -1.26501700 |
| C | 8.31352800 | 4.15212600  | 0.09770400  |
| C | 8.26759800 | 2.86431800  | 0.63184900  |
| C | 7.99305700 | 1.76891100  | -0.19963300 |
| C | 7.74737700 | 1.97671400  | -1.56534400 |
| C | 7.79887500 | 3.26655700  | -2.09324500 |

|   |             |             |             |
|---|-------------|-------------|-------------|
| H | 8.52370700  | 4.99790000  | 0.74662000  |
| H | 8.43334400  | 2.71181300  | 1.69378100  |
| H | 7.49457700  | 1.13443400  | -2.20355200 |
| H | 7.60295700  | 3.42023500  | -3.15038900 |
| C | 12.30634000 | -1.52655500 | 0.20642100  |
| C | 12.08532100 | -0.15327500 | 0.33721000  |
| C | 10.78421900 | 0.34859500  | 0.38646300  |
| C | 9.68983300  | -0.52440500 | 0.31149400  |
| C | 9.92101900  | -1.89977200 | 0.16065500  |
| C | 11.22149200 | -2.40021300 | 0.11402000  |
| H | 12.92806700 | 0.53004400  | 0.39399200  |
| H | 10.61738100 | 1.41811000  | 0.47023500  |
| H | 9.08513500  | -2.58217500 | 0.05869900  |
| H | 11.37765000 | -3.46806000 | -0.00859400 |
| P | 7.95020500  | 0.04533700  | 0.40960400  |
| C | 2.13301000  | -5.58148400 | -0.46303000 |
| C | 3.11947400  | -6.25545600 | 0.26443500  |
| C | 4.32253400  | -5.61958600 | 0.56009500  |
| C | 4.54436700  | -4.30099100 | 0.13393400  |
| C | 3.55873500  | -3.63304800 | -0.60293600 |
| C | 2.35386700  | -4.27493700 | -0.89760400 |
| H | 2.95101800  | -7.27656300 | 0.59497200  |
| H | 5.09234600  | -6.14359500 | 1.11921000  |
| H | 3.75079600  | -2.62979700 | -0.97122300 |
| H | 1.59640900  | -3.75470300 | -1.47636300 |
| C | 6.42683600  | -3.14018700 | 5.10950900  |
| C | 5.20320500  | -3.46148000 | 4.52437700  |
| C | 5.09821300  | -3.59220100 | 3.13763500  |
| C | 6.21965600  | -3.39561000 | 2.32219400  |
| C | 7.44434900  | -3.05073600 | 2.91951100  |
| C | 7.54856800  | -2.93654300 | 4.30196800  |
| H | 4.32540200  | -3.61782400 | 5.14530800  |
| H | 4.14420400  | -3.85205700 | 2.69144700  |
| H | 8.31845800  | -2.86868700 | 2.30233200  |
| H | 8.50076000  | -2.66611400 | 4.74703900  |
| C | 9.47370900  | -6.26174600 | -0.95882600 |
| C | 9.07613300  | -6.32210500 | 0.37836300  |
| C | 8.05132200  | -5.49682000 | 0.84407700  |
| C | 7.41973200  | -4.59926700 | -0.02683900 |
| C | 7.81915400  | -4.54604200 | -1.37311000 |
| C | 8.83954700  | -5.37655000 | -1.83405000 |
| H | 9.56417800  | -7.01160800 | 1.06170400  |
| H | 7.75631700  | -5.53878100 | 1.88728500  |
| H | 7.33920000  | -3.84396400 | -2.05123100 |

|    |             |             |             |
|----|-------------|-------------|-------------|
| H  | 9.14415500  | -5.32327100 | -2.87515000 |
| P  | 6.10685900  | -3.42582400 | 0.49417000  |
| Cu | 6.52465900  | -1.43455600 | -0.62206200 |
| H  | 8.11592500  | 5.35848700  | -1.67756400 |
| H  | 6.71818100  | 0.51929300  | 5.97285100  |
| H  | 6.50704300  | -3.03975000 | 6.18810800  |
| H  | 13.32140200 | -1.91122200 | 0.16373700  |
| H  | 10.27459700 | -6.90218300 | -1.31762100 |
| H  | 1.19701800  | -6.08111000 | -0.69689700 |
| I  | 5.71490100  | -1.23843500 | -3.05774400 |

**IM8**

|   |             |             |             |
|---|-------------|-------------|-------------|
| C | 7.70118700  | 0.32086000  | 5.05484500  |
| C | 8.95709400  | 0.21390500  | 4.45679800  |
| C | 9.06746900  | 0.11083500  | 3.06814900  |
| C | 7.91713300  | 0.10857900  | 2.27029300  |
| C | 6.65643400  | 0.19436700  | 2.88054700  |
| C | 6.54977900  | 0.30963200  | 4.26320300  |
| H | 9.85464500  | 0.21650400  | 5.06955100  |
| H | 10.04646200 | 0.03258300  | 2.60538200  |
| H | 5.76021000  | 0.15587500  | 2.26688600  |
| H | 5.56902300  | 0.36782000  | 4.72542900  |
| C | 7.34802400  | 4.35857500  | -0.97687500 |
| C | 8.17664300  | 4.11753000  | 0.12377800  |
| C | 8.36995800  | 2.81392100  | 0.57629600  |
| C | 7.74170900  | 1.74343300  | -0.07928300 |
| C | 6.89359100  | 1.98641000  | -1.17055900 |
| C | 6.70579100  | 3.29728500  | -1.61533800 |
| H | 8.66453600  | 4.94552700  | 0.63090200  |
| H | 8.99810100  | 2.62533600  | 1.44270900  |
| H | 6.37291800  | 1.15311200  | -1.64546900 |
| H | 6.04924400  | 3.48575900  | -2.46030600 |
| C | 12.27347900 | -1.31966800 | -0.59572100 |
| C | 11.93805600 | 0.03010800  | -0.71155100 |
| C | 10.65068300 | 0.46798600  | -0.39263000 |
| C | 9.68502700  | -0.44587100 | 0.04692900  |
| C | 10.02805000 | -1.80465600 | 0.14862500  |
| C | 11.31360100 | -2.23903600 | -0.16457800 |
| H | 12.67860400 | 0.74684100  | -1.05558700 |
| H | 10.39455100 | 1.51715500  | -0.49411400 |
| H | 9.27962700  | -2.52729200 | 0.45661300  |
| H | 11.55562500 | -3.29535600 | -0.08748000 |
| P | 7.95255300  | 0.00461700  | 0.44090600  |
| C | 2.17986400  | -5.24826300 | -1.06133100 |



|    |             |             |             |
|----|-------------|-------------|-------------|
| C  | 3.01711600  | -6.03624700 | -0.26482600 |
| C  | 4.24063000  | -5.53254300 | 0.17115200  |
| C  | 4.63483900  | -4.23533200 | -0.18895000 |
| C  | 3.79804400  | -3.44846300 | -0.99543000 |
| C  | 2.57105700  | -3.95993800 | -1.42536100 |
| H  | 2.71566000  | -7.04236300 | 0.01348300  |
| H  | 4.89030500  | -6.14742200 | 0.78681700  |
| H  | 4.12452400  | -2.45557700 | -1.30683100 |
| H  | 1.92811500  | -3.34930700 | -2.05302700 |
| C  | 5.87971800  | -3.04305800 | 4.96509300  |
| C  | 4.72284000  | -3.21089300 | 4.20518600  |
| C  | 4.80727000  | -3.38224000 | 2.82128500  |
| C  | 6.05460800  | -3.37985800 | 2.18519900  |
| C  | 7.21340500  | -3.18789800 | 2.95632200  |
| C  | 7.12715000  | -3.03285800 | 4.33578500  |
| H  | 3.74925100  | -3.21735500 | 4.68764200  |
| H  | 3.90404700  | -3.52610400 | 2.23741300  |
| H  | 8.18648200  | -3.16045100 | 2.47571700  |
| H  | 8.03114300  | -2.87879300 | 4.91612300  |
| C  | 9.49449600  | -6.69408700 | -0.30072100 |
| C  | 8.68725000  | -6.77376200 | 0.83661000  |
| C  | 7.69134800  | -5.82306800 | 1.05711900  |
| C  | 7.48979400  | -4.78206100 | 0.13850900  |
| C  | 8.30730500  | -4.70753800 | -0.99851000 |
| C  | 9.30308900  | -5.65963700 | -1.21832700 |
| H  | 8.83667100  | -7.57477700 | 1.55525600  |
| H  | 7.08366700  | -5.87561500 | 1.95485300  |
| H  | 8.16524200  | -3.89573600 | -1.70442700 |
| H  | 9.93045900  | -5.58823900 | -2.10219400 |
| P  | 6.21140500  | -3.48384100 | 0.36023000  |
| Cu | 6.55116100  | -1.44799500 | -0.65180300 |
| H  | 7.19659000  | 5.37642800  | -1.32630800 |
| H  | 7.61778000  | 0.40121100  | 6.13512000  |
| H  | 5.81194000  | -2.91192900 | 6.04130900  |
| H  | 13.27500800 | -1.65541400 | -0.84950800 |
| H  | 10.27281200 | -7.43335100 | -0.46780700 |
| H  | 1.22669300  | -5.64455200 | -1.40076200 |
| C  | 4.28868200  | -1.15099200 | -4.14276500 |
| C  | 5.67170700  | -1.14006600 | -3.45880200 |
| H  | 3.65375800  | -1.92321100 | -3.69293400 |
| H  | 3.80046900  | -0.18171200 | -3.99380900 |
| H  | 4.35727000  | -1.34696900 | -5.22083700 |
| C  | 6.57605300  | -0.10081000 | -4.15537200 |
| C  | 6.31831400  | -2.53293100 | -3.61145800 |

|   |            |             |             |
|---|------------|-------------|-------------|
| H | 7.54597800 | -0.05421700 | -3.64459800 |
| H | 6.75154400 | -0.33906800 | -5.21280200 |
| H | 6.11824500 | 0.89376400  | -4.09977900 |
| H | 6.40767300 | -2.84096500 | -4.66161200 |
| H | 7.32840400 | -2.51519800 | -3.17973900 |
| H | 5.72850200 | -3.28802900 | -3.08027000 |
| O | 5.49979300 | -0.79294400 | -2.11581900 |

**TS4**

|   |             |             |             |
|---|-------------|-------------|-------------|
| B | -3.81270700 | -4.26050700 | -1.86113700 |
| C | -3.71612500 | -5.54552900 | 0.09682300  |
| C | -3.05321600 | -6.90985900 | -0.09634300 |
| H | -3.48267600 | -7.65802100 | 0.57871200  |
| H | -1.98345200 | -6.82469600 | 0.11770200  |
| H | -3.16319300 | -7.26128900 | -1.12262100 |
| C | -5.19811700 | -5.48399900 | -0.43553400 |
| C | -6.11151300 | -4.57378200 | 0.39152300  |
| H | -6.29620200 | -4.99229400 | 1.38699900  |
| H | -7.06944200 | -4.46514600 | -0.12164400 |
| H | -5.68750600 | -3.57496600 | 0.50881600  |
| C | -5.87849400 | -6.83894000 | -0.62342200 |
| H | -6.88042200 | -6.68049500 | -1.03469500 |
| H | -5.98179800 | -7.36717300 | 0.33159800  |
| H | -5.32719200 | -7.47415500 | -1.31950100 |
| C | -3.52706000 | -5.09385200 | 1.54434900  |
| H | -3.88812300 | -4.07574600 | 1.70367900  |
| H | -2.46109100 | -5.11931500 | 1.79443500  |
| H | -4.05405600 | -5.76001500 | 2.23670900  |
| O | -5.05169500 | -4.87526700 | -1.74140900 |
| O | -3.02525900 | -4.59113200 | -0.75637000 |
| B | -2.91683900 | -4.14308000 | -4.05195100 |
| C | -1.51463300 | -5.96452200 | -4.34851700 |
| C | -1.14888200 | -6.57225700 | -2.99406800 |
| H | -0.12170200 | -6.95221500 | -2.98814900 |
| H | -1.82176700 | -7.40971500 | -2.79039900 |
| H | -1.26393800 | -5.83576600 | -2.19622900 |
| C | -0.73868200 | -4.62898700 | -4.63332400 |
| C | -0.65312500 | -4.28432200 | -6.12765600 |
| H | 0.03545100  | -4.95057500 | -6.65925900 |
| H | -0.28929500 | -3.25755500 | -6.22800000 |
| H | -1.63221000 | -4.34095400 | -6.60900000 |
| C | 0.65583300  | -4.55272200 | -4.01905000 |
| H | 1.10440900  | -3.58181600 | -4.24875200 |
| H | 1.30429800  | -5.33606700 | -4.42960500 |

|   |             |             |             |
|---|-------------|-------------|-------------|
| H | 0.62267100  | -4.64990700 | -2.93425600 |
| C | -1.39298800 | -7.01998700 | -5.44449800 |
| H | -1.75195000 | -6.64550900 | -6.40581800 |
| H | -1.99045700 | -7.89805700 | -5.17795800 |
| H | -0.35095900 | -7.33990400 | -5.56198500 |
| O | -1.58209500 | -3.65358300 | -3.99787800 |
| O | -2.89657600 | -5.53414100 | -4.29647000 |
| C | -3.82902300 | 0.36258800  | 2.27430700  |
| C | -4.55872700 | 1.27138000  | 1.50728000  |
| C | -5.02934300 | 0.91048300  | 0.24393900  |
| C | -4.77423500 | -0.36844600 | -0.26222300 |
| C | -4.00580700 | -1.26613200 | 0.49818800  |
| C | -3.54397700 | -0.90440800 | 1.76213600  |
| H | -4.75566700 | 2.26970900  | 1.88732000  |
| H | -5.58227200 | 1.62962400  | -0.35027500 |
| H | -3.76038900 | -2.24225100 | 0.09170300  |
| H | -2.95353000 | -1.61044600 | 2.33956000  |
| C | -9.53956800 | -2.83794800 | -0.67609800 |
| C | -8.90848200 | -1.96586300 | 0.21217400  |
| C | -7.67705300 | -1.39656600 | -0.11665700 |
| C | -7.06294000 | -1.69894000 | -1.33903500 |
| C | -7.69910500 | -2.58209700 | -2.22180000 |
| C | -8.93217800 | -3.14330200 | -1.89656700 |
| H | -9.37207000 | -1.72984000 | 1.16610900  |
| H | -7.18747400 | -0.73039500 | 0.58597900  |
| H | -7.21750500 | -2.84627100 | -3.15529900 |
| H | -9.40959800 | -3.83118200 | -2.58867300 |
| C | -6.60236600 | 2.62051000  | -4.48541900 |
| C | -7.33845600 | 2.36351700  | -3.32536600 |
| C | -7.01254700 | 1.27570400  | -2.51617300 |
| C | -5.93306200 | 0.44460800  | -2.84947100 |
| C | -5.21650500 | 0.69569100  | -4.02781300 |
| C | -5.54623200 | 1.78020800  | -4.84079300 |
| H | -8.17257200 | 3.00591400  | -3.05693300 |
| H | -7.60577900 | 1.06028900  | -1.63237700 |
| H | -4.40206000 | 0.03504100  | -4.30785800 |
| H | -4.97953800 | 1.96210200  | -5.74966900 |
| P | -5.43728300 | -1.01010800 | -1.84761400 |
| C | 1.88527700  | -2.73251100 | -0.87349600 |
| C | 2.05658100  | -1.70379000 | -1.80283300 |
| C | 0.94733800  | -1.12199000 | -2.41726200 |
| C | -0.34287500 | -1.57414100 | -2.11651400 |
| C | -0.50963300 | -2.62158800 | -1.20188300 |
| C | 0.60028700  | -3.18840000 | -0.57476700 |

|    |              |             |             |
|----|--------------|-------------|-------------|
| H  | 3.05502200   | -1.35248200 | -2.04914300 |
| H  | 1.09043000   | -0.32607000 | -3.14039400 |
| H  | -1.49723300  | -3.02201100 | -1.00823500 |
| H  | 0.45594100   | -4.00373800 | 0.12906900  |
| C  | -2.21712600  | 3.10958200  | -0.32036700 |
| C  | -1.56711400  | 1.99622300  | 0.21229900  |
| C  | -1.43679300  | 0.82820200  | -0.53793400 |
| C  | -1.95118400  | 0.75591700  | -1.83998100 |
| C  | -2.60899800  | 1.87976900  | -2.36415400 |
| C  | -2.74225300  | 3.04496400  | -1.61147300 |
| H  | -1.16270100  | 2.03138900  | 1.21977400  |
| H  | -0.93168300  | -0.02999700 | -0.10919400 |
| H  | -3.00670600  | 1.85418800  | -3.37053000 |
| H  | -3.25392700  | 3.90253700  | -2.04007900 |
| C  | -0.80021000  | 0.69377900  | -7.07366400 |
| C  | -0.30553400  | 1.38524400  | -5.96525800 |
| C  | -0.61075400  | 0.95002500  | -4.67605300 |
| C  | -1.40808000  | -0.18897700 | -4.47910300 |
| C  | -1.90723700  | -0.87489100 | -5.59665200 |
| C  | -1.60219000  | -0.43256100 | -6.88532800 |
| H  | 0.31377900   | 2.26733100  | -6.10394200 |
| H  | -0.24773200  | 1.51018600  | -3.82045000 |
| H  | -2.52519200  | -1.75354900 | -5.45211600 |
| H  | -1.99371000  | -0.97389500 | -7.74261600 |
| P  | -1.86360500  | -0.81260600 | -2.81041000 |
| Cu | -3.74821000  | -2.32796000 | -2.71629300 |
| H  | -10.49538700 | -3.28387900 | -0.41573400 |
| H  | -3.46699800  | 0.64795100  | 3.25812500  |
| H  | -2.31685500  | 4.01813900  | 0.26718500  |
| H  | -6.86242700  | 3.46540100  | -5.11697700 |
| H  | -0.56465700  | 1.03592400  | -8.07782300 |
| H  | 2.75080800   | -3.18210200 | -0.39431000 |
| C  | -4.45322300  | -4.30604900 | -6.88081900 |
| C  | -4.96418200  | -3.72472600 | -5.55695100 |
| H  | -3.83497300  | -3.57097800 | -7.40813300 |
| H  | -3.85500300  | -5.19983500 | -6.68924700 |
| H  | -5.29205700  | -4.58124800 | -7.53107500 |
| C  | -5.81230700  | -4.75967600 | -4.81202500 |
| C  | -5.76236100  | -2.44523500 | -5.81605500 |
| H  | -6.06348100  | -4.41335100 | -3.80938100 |
| H  | -6.73552900  | -4.95398300 | -5.37152600 |
| H  | -5.26283800  | -5.69615400 | -4.69893800 |
| H  | -6.63841900  | -2.64998600 | -6.44107900 |
| H  | -6.10239200  | -2.00470800 | -4.87461800 |

|   |             |             |             |
|---|-------------|-------------|-------------|
| H | -5.13792900 | -1.70287700 | -6.32493600 |
| O | -3.82499600 | -3.30074200 | -4.77802400 |

**TS5**

|    |             |             |             |
|----|-------------|-------------|-------------|
| Cu | 0.04416600  | 0.35632900  | -0.25738200 |
| B  | -2.98394700 | 1.39708700  | 0.13027700  |
| O  | -4.08774200 | 1.56291900  | 0.96901100  |
| C  | -4.80881700 | 0.31889300  | 0.96650000  |
| C  | -4.46119100 | -0.26424600 | -0.45029500 |
| O  | -3.13244300 | 0.25227100  | -0.68538300 |
| C  | -1.87480500 | 2.47911900  | 0.05355100  |
| H  | -2.12058300 | 3.37812600  | 0.62167600  |
| C  | -1.03551900 | 2.80922600  | -1.14533000 |
| C  | -1.02248300 | 1.95258900  | -2.25859200 |
| C  | -0.14884000 | 2.17314000  | -3.32601900 |
| C  | 0.71607500  | 3.26822100  | -3.30842900 |
| C  | 0.68632100  | 4.14794200  | -2.22408700 |
| C  | -0.17883600 | 3.91813200  | -1.15308300 |
| H  | -1.73456800 | 1.13677700  | -2.26928000 |
| H  | -0.14682100 | 1.49369700  | -4.17577600 |
| H  | 1.40605200  | 3.43655700  | -4.12985200 |
| H  | 1.34755000  | 5.01092800  | -2.20978400 |
| H  | -0.17758200 | 4.59050700  | -0.29965500 |
| C  | -4.43863200 | -1.78703700 | -0.52188700 |
| H  | -3.68663200 | -2.21253500 | 0.14514900  |
| H  | -5.41815400 | -2.19634600 | -0.24679300 |
| H  | -4.20862700 | -2.11138800 | -1.53925500 |
| C  | -5.35814400 | 0.29441300  | -1.56221400 |
| H  | -6.37684800 | -0.10469600 | -1.50864100 |
| H  | -5.40573100 | 1.38636200  | -1.51092500 |
| H  | -4.92732800 | 0.01378300  | -2.52851900 |
| C  | -6.29008000 | 0.61109100  | 1.18792300  |
| H  | -6.43616200 | 1.02788900  | 2.18960000  |
| H  | -6.66491900 | 1.33703500  | 0.46311300  |
| H  | -6.88604100 | -0.30586600 | 1.10926800  |
| C  | -4.26565900 | -0.53309000 | 2.12152700  |
| H  | -3.19610700 | -0.71307000 | 1.99752700  |
| H  | -4.39550300 | 0.02017300  | 3.05621000  |
| H  | -4.78454100 | -1.49404700 | 2.20630700  |
| N  | -1.24817100 | 1.40695600  | 0.90348000  |
| C  | -0.92992000 | 1.67170200  | 2.22786000  |
| C  | -0.64206600 | 0.57253500  | 3.07436100  |
| C  | -0.85807900 | 2.95580100  | 2.81302600  |
| C  | -0.30833400 | 0.74324800  | 4.41280000  |

|   |             |             |             |
|---|-------------|-------------|-------------|
| H | -0.71912500 | -0.42546500 | 2.65854700  |
| C | -0.53078400 | 3.11746300  | 4.15631100  |
| H | -1.04077600 | 3.83688800  | 2.20890900  |
| C | -0.25225300 | 2.02129000  | 4.97559200  |
| H | -0.10009800 | -0.13276100 | 5.02407100  |
| H | -0.47599500 | 4.12400400  | 4.56454300  |
| H | 0.00116800  | 2.15916700  | 6.02271200  |
| C | 4.11693400  | -2.83582500 | 2.26594100  |
| C | 2.79067300  | -2.47264200 | 2.50743700  |
| C | 2.27179800  | -1.31277800 | 1.93317600  |
| C | 3.07263500  | -0.49843500 | 1.11841000  |
| C | 4.40802400  | -0.85914100 | 0.89627600  |
| C | 4.92483700  | -2.02329700 | 1.46611000  |
| H | 2.14886400  | -3.09969900 | 3.11843600  |
| H | 1.23804700  | -1.04099800 | 2.10906100  |
| H | 5.03433400  | -0.24828200 | 0.25520800  |
| H | 5.95934000  | -2.29969000 | 1.28037700  |
| C | 2.68806700  | 4.46244500  | 3.25315300  |
| C | 2.74493000  | 3.15277000  | 3.72816900  |
| C | 2.64653400  | 2.07814000  | 2.84540500  |
| C | 2.49045200  | 2.30675900  | 1.47407800  |
| C | 2.42701000  | 3.62595800  | 1.00029400  |
| C | 2.52807300  | 4.69630500  | 1.88587300  |
| H | 2.85051600  | 2.96103200  | 4.79123600  |
| H | 2.67420000  | 1.06562900  | 3.23024700  |
| H | 2.30290000  | 3.80952000  | -0.06039200 |
| H | 2.48205400  | 5.71401400  | 1.50713600  |
| C | 5.06453900  | 1.85846500  | -3.27384100 |
| C | 5.41074900  | 2.31798600  | -1.99995900 |
| C | 4.57554400  | 2.06260500  | -0.91312700 |
| C | 3.38201600  | 1.34539000  | -1.09100900 |
| C | 3.03759700  | 0.90091500  | -2.37324400 |
| C | 3.87746200  | 1.14951400  | -3.45815900 |
| H | 6.33147300  | 2.87597600  | -1.85348800 |
| H | 4.84141100  | 2.42866600  | 0.07351100  |
| H | 2.11036400  | 0.36267200  | -2.52080700 |
| H | 3.59917600  | 0.78826500  | -4.44358000 |
| P | 2.25684300  | 0.92623600  | 0.29162600  |
| C | -0.56498300 | -4.55096700 | 2.30954000  |
| C | 0.26555500  | -4.95705100 | 1.26256500  |
| C | 0.43020800  | -4.14571300 | 0.13836600  |
| C | -0.22967400 | -2.91343000 | 0.06053900  |
| C | -1.07214600 | -2.51723200 | 1.10986400  |
| C | -1.24113800 | -3.33077800 | 2.22839500  |

|   |             |             |             |
|---|-------------|-------------|-------------|
| H | 0.78838700  | -5.90767700 | 1.32018100  |
| H | 1.08044100  | -4.46549500 | -0.66901400 |
| H | -1.58318300 | -1.56268300 | 1.03973100  |
| H | -1.89255200 | -3.00581200 | 3.03459300  |
| C | 3.85318200  | -2.58097900 | -3.61513700 |
| C | 3.81906900  | -2.64763900 | -2.22173500 |
| C | 2.61909200  | -2.46397000 | -1.53806100 |
| C | 1.42957900  | -2.21448600 | -2.24027400 |
| C | 1.46891300  | -2.16184000 | -3.64154400 |
| C | 2.67374800  | -2.34227000 | -4.32220200 |
| H | 4.72791500  | -2.82951800 | -1.65620500 |
| H | 2.61328300  | -2.50616500 | -0.45699300 |
| H | 0.55832000  | -1.98001000 | -4.20297400 |
| H | 2.68760300  | -2.29906700 | -5.40789800 |
| C | -3.44856800 | -3.08078400 | -4.24637300 |
| C | -2.94111300 | -3.98275300 | -3.30894100 |
| C | -1.93526800 | -3.58811300 | -2.42745100 |
| C | -1.42606200 | -2.28318600 | -2.47075700 |
| C | -1.93879100 | -1.38571400 | -3.41610100 |
| C | -2.94152500 | -1.78167700 | -4.30123300 |
| H | -3.33297300 | -4.99474600 | -3.25891100 |
| H | -1.55706600 | -4.29258600 | -1.69465500 |
| H | -1.55966900 | -0.37331800 | -3.45718100 |
| H | -3.33235700 | -1.07120200 | -5.02394700 |
| P | -0.09184500 | -1.72918100 | -1.33114000 |
| H | -0.68732000 | -5.18430200 | 3.18367600  |
| H | -4.23741900 | -3.38752200 | -4.92716600 |
| H | 5.71760200  | 2.05812600  | -4.11902200 |
| H | 2.76110100  | 5.29724100  | 3.94458500  |
| H | 4.51989200  | -3.74810700 | 2.69686400  |
| H | 4.79115500  | -2.71399400 | -4.14636800 |

**IM9**

|    |             |            |             |
|----|-------------|------------|-------------|
| Cu | -0.22660900 | 0.17338600 | -0.05464300 |
| B  | -3.10645700 | 1.53185200 | 0.54140600  |
| O  | -4.23014200 | 1.48825900 | 1.42704100  |
| C  | -5.35157300 | 1.02695700 | 0.67112000  |
| C  | -4.94226000 | 1.40140600 | -0.79632700 |
| O  | -3.53071800 | 1.13683000 | -0.77917500 |
| C  | -1.92152500 | 2.59538600 | 0.79708500  |
| H  | -1.96164000 | 3.14500600 | 1.73712600  |
| C  | -1.16226100 | 3.26780700 | -0.26152800 |
| C  | -0.73718500 | 2.61169700 | -1.43391300 |
| C  | -0.00121200 | 3.28132300 | -2.41171300 |

|   |             |             |             |
|---|-------------|-------------|-------------|
| C | 0.29564900  | 4.63838900  | -2.27138900 |
| C | -0.16901500 | 5.31945700  | -1.14133600 |
| C | -0.87669400 | 4.64212900  | -0.15168400 |
| H | -1.03537000 | 1.57793300  | -1.60622100 |
| H | 0.33476200  | 2.74156200  | -3.29228500 |
| H | 0.86672300  | 5.15862400  | -3.03479900 |
| H | 0.04096700  | 6.37969200  | -1.02137400 |
| H | -1.20349500 | 5.17329800  | 0.73884900  |
| C | -5.61162900 | 0.55905200  | -1.87498000 |
| H | -5.41205800 | -0.50410300 | -1.73359600 |
| H | -6.69682500 | 0.71364400  | -1.86758000 |
| H | -5.23650700 | 0.85487500  | -2.86160400 |
| C | -5.15056800 | 2.89359200  | -1.09865100 |
| H | -6.21201900 | 3.14710700  | -1.19579800 |
| H | -4.71137500 | 3.51274700  | -0.31184600 |
| H | -4.64615100 | 3.13463400  | -2.03986300 |
| C | -6.61024000 | 1.72288300  | 1.18384800  |
| H | -6.80948800 | 1.41157100  | 2.21493900  |
| H | -6.48706700 | 2.80828000  | 1.17945900  |
| H | -7.48450000 | 1.46355400  | 0.57449400  |
| C | -5.47243700 | -0.49311100 | 0.86439500  |
| H | -4.60003100 | -1.00348500 | 0.44296000  |
| H | -5.51446600 | -0.70652900 | 1.93745400  |
| H | -6.37536200 | -0.90307000 | 0.39771500  |
| N | -1.70295600 | 1.10551700  | 1.02221700  |
| C | -1.45646200 | 0.70412100  | 2.35955300  |
| C | -2.19726100 | -0.34258100 | 2.93245900  |
| C | -0.43187100 | 1.29962900  | 3.11339700  |
| C | -1.87664400 | -0.81655700 | 4.20483000  |
| H | -3.02322800 | -0.76319900 | 2.37163200  |
| C | -0.11264400 | 0.81660800  | 4.38034100  |
| H | 0.11163200  | 2.13590800  | 2.69159800  |
| C | -0.82418300 | -0.25319400 | 4.93137300  |
| H | -2.46402400 | -1.62379300 | 4.63618300  |
| H | 0.69851600  | 1.28085700  | 4.93498000  |
| H | -0.57706100 | -0.62712600 | 5.92084300  |
| C | 4.06304200  | -2.78925400 | 2.27967100  |
| C | 2.75643900  | -2.43014100 | 2.61417600  |
| C | 2.17718100  | -1.29794900 | 2.04186000  |
| C | 2.90020000  | -0.51312100 | 1.13062700  |
| C | 4.21888200  | -0.86746100 | 0.81557600  |
| C | 4.79519000  | -2.00211100 | 1.38657900  |
| H | 2.17399700  | -3.04103700 | 3.29583700  |
| H | 1.15713400  | -1.02902500 | 2.29632800  |



|   |             |             |             |
|---|-------------|-------------|-------------|
| H | 4.78107700  | -0.27716100 | 0.10014400  |
| H | 5.81415200  | -2.27706200 | 1.12774100  |
| C | 2.70300400  | 4.53338000  | 3.09358300  |
| C | 3.04469800  | 3.26057900  | 3.55484000  |
| C | 2.88348100  | 2.14722000  | 2.72911900  |
| C | 2.37709100  | 2.30335400  | 1.43234500  |
| C | 2.04551100  | 3.58432300  | 0.96803100  |
| C | 2.20777000  | 4.69197700  | 1.79725200  |
| H | 3.43631300  | 3.13179300  | 4.56018800  |
| H | 3.13793600  | 1.15907800  | 3.09702500  |
| H | 1.65778200  | 3.71652900  | -0.03485900 |
| H | 1.93465100  | 5.67609300  | 1.42809500  |
| C | 4.39300600  | 1.81902900  | -3.51508600 |
| C | 4.90033100  | 2.23060000  | -2.27981000 |
| C | 4.19034200  | 1.96708100  | -1.10944100 |
| C | 2.96659900  | 1.28204600  | -1.16358100 |
| C | 2.45809300  | 0.89114200  | -2.40718100 |
| C | 3.16975000  | 1.15127300  | -3.57729400 |
| H | 5.84678300  | 2.76160700  | -2.22889000 |
| H | 4.57692900  | 2.30363600  | -0.15245100 |
| H | 1.50456400  | 0.38076700  | -2.45771000 |
| H | 2.76603600  | 0.83024500  | -4.53236500 |
| P | 2.00509600  | 0.88080000  | 0.34161600  |
| C | 0.08977700  | -5.13797500 | 2.34727900  |
| C | 0.69267900  | -5.39911400 | 1.11443800  |
| C | 0.61552100  | -4.46511000 | 0.08138400  |
| C | -0.06239800 | -3.25346300 | 0.27600900  |
| C | -0.66217000 | -2.99936000 | 1.51536200  |
| C | -0.59109300 | -3.93539900 | 2.54515700  |
| H | 1.22666000  | -6.33197800 | 0.95622200  |
| H | 1.10284800  | -4.67089500 | -0.86577600 |
| H | -1.16656600 | -2.05589500 | 1.68858700  |
| H | -1.05217900 | -3.70872600 | 3.50195300  |
| C | 3.44093700  | -2.44008100 | -3.80646200 |
| C | 3.58793100  | -2.55755500 | -2.42360200 |
| C | 2.47589600  | -2.46546000 | -1.58944300 |
| C | 1.19746000  | -2.25729700 | -2.12761700 |
| C | 1.05520600  | -2.14386700 | -3.51836200 |
| C | 2.17169300  | -2.23599300 | -4.35041500 |
| H | 4.56966700  | -2.71361800 | -1.98600600 |
| H | 2.60323300  | -2.55789800 | -0.51869500 |
| H | 0.07261900  | -1.98699100 | -3.95135300 |
| H | 2.04670300  | -2.15055500 | -5.42641100 |
| C | -3.66919900 | -3.26392800 | -3.80541900 |

|            |             |             |             |
|------------|-------------|-------------|-------------|
| C          | -2.70632200 | -4.19720000 | -3.40906000 |
| C          | -1.69107300 | -3.81603400 | -2.53760700 |
| C          | -1.63700600 | -2.50231700 | -2.04354800 |
| C          | -2.62021300 | -1.57658200 | -2.41413600 |
| C          | -3.62520100 | -1.96305000 | -3.30798200 |
| H          | -2.74382600 | -5.21581800 | -3.78507600 |
| H          | -0.93421300 | -4.53647100 | -2.24375600 |
| H          | -2.62759000 | -0.57274400 | -1.99410500 |
| H          | -4.37642000 | -1.24169100 | -3.60839800 |
| P          | -0.22765500 | -1.95457900 | -1.01011800 |
| H          | 0.15571200  | -5.86723900 | 3.14993600  |
| H          | -4.45500000 | -3.55521400 | -4.49692000 |
| H          | 4.94722400  | 2.02696900  | -4.42613700 |
| H          | 2.82222900  | 5.39715400  | 3.74153500  |
| H          | 4.50948800  | -3.68098700 | 2.71054700  |
| H          | 4.30900400  | -2.50558000 | -4.45593600 |
| <b>TS6</b> |             |             |             |
| Cu         | 0.23452100  | 0.30394400  | -0.33616500 |
| B          | -3.68620200 | 1.36151600  | 0.44654600  |
| O          | -4.68072400 | 1.86027400  | 1.29991700  |
| C          | -5.92959100 | 1.79363600  | 0.58677900  |
| C          | -5.46514100 | 1.71488800  | -0.91371500 |
| O          | -4.22707600 | 0.98711100  | -0.79991500 |
| C          | -1.98920200 | 2.29209400  | 0.47172600  |
| H          | -1.92774500 | 3.02583600  | 1.27481300  |
| C          | -1.20713600 | 2.48146800  | -0.69294600 |
| C          | -1.05486800 | 1.45885800  | -1.69738400 |
| C          | -0.24022400 | 1.67722600  | -2.83032000 |
| C          | 0.44821300  | 2.86604000  | -3.01327800 |
| C          | 0.27113800  | 3.89215500  | -2.06108800 |
| C          | -0.52933900 | 3.71603400  | -0.94964900 |
| H          | -1.76569500 | 0.64164200  | -1.71297800 |
| H          | -0.17166800 | 0.88837900  | -3.57565300 |
| H          | 1.09888000  | 3.01287100  | -3.86839300 |
| H          | 0.78166700  | 4.84264500  | -2.20058300 |
| H          | -0.66520600 | 4.53276600  | -0.24362300 |
| C          | -6.40555900 | 0.95197300  | -1.84009800 |
| H          | -6.57922100 | -0.06831100 | -1.48950100 |
| H          | -7.37369200 | 1.46025700  | -1.91612500 |
| H          | -5.96876400 | 0.89782100  | -2.84265000 |
| C          | -5.13872500 | 3.09086000  | -1.50979300 |
| H          | -6.03961800 | 3.69256200  | -1.67039700 |
| H          | -4.45310400 | 3.63974200  | -0.85830500 |

|   |             |             |             |
|---|-------------|-------------|-------------|
| H | -4.63969500 | 2.94529000  | -2.47282500 |
| C | -6.76341100 | 3.02322100  | 0.93320200  |
| H | -7.03539200 | 2.99887400  | 1.99357900  |
| H | -6.20329500 | 3.94263100  | 0.74961000  |
| H | -7.68762300 | 3.04943600  | 0.34391100  |
| C | -6.64326100 | 0.51734800  | 1.05124500  |
| H | -6.06755500 | -0.37063100 | 0.77043200  |
| H | -6.72444900 | 0.53882700  | 2.14232600  |
| H | -7.65058600 | 0.42907300  | 0.62936800  |
| N | -2.36580400 | 0.93905200  | 0.86485300  |
| C | -1.92772800 | 0.37408300  | 2.05241900  |
| C | -2.67971500 | -0.63938800 | 2.68186900  |
| C | -0.69964800 | 0.75415900  | 2.63065300  |
| C | -2.21104800 | -1.24588600 | 3.84357700  |
| H | -3.63433100 | -0.92773700 | 2.25217700  |
| C | -0.23194300 | 0.12558500  | 3.78410000  |
| H | -0.14254200 | 1.57122400  | 2.18979500  |
| C | -0.97983100 | -0.87993900 | 4.40252500  |
| H | -2.81218200 | -2.01845200 | 4.31683800  |
| H | 0.71869400  | 0.44304400  | 4.20552900  |
| H | -0.62258000 | -1.35650200 | 5.31070700  |
| C | 4.68201400  | -2.72703500 | 1.68993700  |
| C | 3.39350800  | -2.48547100 | 2.17297600  |
| C | 2.71661000  | -1.32639500 | 1.79772600  |
| C | 3.31998800  | -0.39901300 | 0.93533100  |
| C | 4.61920200  | -0.63637400 | 0.46976800  |
| C | 5.29550300  | -1.79778900 | 0.84640600  |
| H | 2.89938500  | -3.20835000 | 2.81409100  |
| H | 1.71004300  | -1.14782800 | 2.16056700  |
| H | 5.09062500  | 0.07308500  | -0.20178700 |
| H | 6.30019300  | -1.97984800 | 0.47453500  |
| C | 2.41561500  | 4.05065900  | 3.89362400  |
| C | 3.08560200  | 2.83395900  | 4.02390800  |
| C | 3.09704300  | 1.91999200  | 2.96817500  |
| C | 2.42872000  | 2.21808200  | 1.77404700  |
| C | 1.75407800  | 3.44252100  | 1.64831900  |
| C | 1.75496700  | 4.35503300  | 2.70066300  |
| H | 3.60303200  | 2.59261900  | 4.94822600  |
| H | 3.62057200  | 0.97641900  | 3.07626800  |
| H | 1.22573800  | 3.66840700  | 0.72770800  |
| H | 1.22806500  | 5.29897400  | 2.59359500  |
| C | 4.78746600  | 2.74463500  | -3.12163700 |
| C | 4.88203300  | 3.35421200  | -1.86907000 |
| C | 4.14703800  | 2.85962700  | -0.79034000 |

|   |             |             |             |
|---|-------------|-------------|-------------|
| C | 3.29791200  | 1.76048900  | -0.96608900 |
| C | 3.19558900  | 1.16068600  | -2.22969300 |
| C | 3.94830000  | 1.64218200  | -3.29773500 |
| H | 5.53228200  | 4.21313200  | -1.72849400 |
| H | 4.22884500  | 3.33022500  | 0.18399000  |
| H | 2.52611700  | 0.32157800  | -2.37761900 |
| H | 3.86470100  | 1.16247700  | -4.26845700 |
| P | 2.31021600  | 1.03003700  | 0.38658400  |
| C | 0.66829300  | -5.23454800 | 2.43424500  |
| C | 1.11409300  | -5.48052500 | 1.13255500  |
| C | 0.94459200  | -4.51662400 | 0.13930200  |
| C | 0.34268200  | -3.28942000 | 0.44745200  |
| C | -0.10659300 | -3.04919500 | 1.75187700  |
| C | 0.05065300  | -4.02025100 | 2.74013200  |
| H | 1.59022400  | -6.42649600 | 0.88959100  |
| H | 1.29359400  | -4.71401800 | -0.86912000 |
| H | -0.57515300 | -2.10345800 | 1.99646700  |
| H | -0.30342700 | -3.81403300 | 3.74537300  |
| C | 3.41641700  | -2.07873600 | -3.95401200 |
| C | 3.69189900  | -2.42455900 | -2.63013500 |
| C | 2.66731600  | -2.46993000 | -1.68553800 |
| C | 1.34605300  | -2.17329300 | -2.05609000 |
| C | 1.07666800  | -1.82331700 | -3.38950900 |
| C | 2.10512200  | -1.77931800 | -4.33092400 |
| H | 4.70852600  | -2.64897100 | -2.32143000 |
| H | 2.90002200  | -2.72739600 | -0.65930500 |
| H | 0.06053400  | -1.58831400 | -3.68985700 |
| H | 1.88004400  | -1.50994600 | -5.35907500 |
| C | -3.94283500 | -3.25937300 | -2.73873100 |
| C | -2.77864000 | -3.97584600 | -3.03768800 |
| C | -1.56302000 | -3.60112300 | -2.47016400 |
| C | -1.50497900 | -2.50177200 | -1.59987600 |
| C | -2.67439400 | -1.79424600 | -1.29520900 |
| C | -3.88977500 | -2.17176000 | -1.86825800 |
| H | -2.81989800 | -4.82470500 | -3.71480800 |
| H | -0.65913000 | -4.15388500 | -2.70890300 |
| H | -2.63987100 | -0.94421900 | -0.62270100 |
| H | -4.77706000 | -1.59190900 | -1.63978500 |
| P | 0.04312700  | -1.96837900 | -0.78424100 |
| H | 0.80004400  | -5.98933400 | 3.20469300  |
| H | -4.88736600 | -3.55044600 | -3.19035600 |
| H | 5.36358400  | 3.13011900  | -3.95824600 |
| H | 2.40472100  | 4.75755200  | 4.71827000  |
| H | 5.20497200  | -3.63777100 | 1.96798800  |

|             |             |             |             |
|-------------|-------------|-------------|-------------|
| H           | 4.21742100  | -2.03956600 | -4.68659000 |
| <b>TS6'</b> |             |             |             |
| C           | 1.36505700  | 3.69891300  | -3.41291100 |
| C           | 2.38245500  | 4.03427700  | -2.51615700 |
| C           | 2.71961800  | 3.16827200  | -1.47525800 |
| C           | 2.04321100  | 1.95080300  | -1.31995200 |
| C           | 1.03488000  | 1.61604100  | -2.23750200 |
| C           | 0.69523300  | 2.48227000  | -3.27590200 |
| H           | 2.90861100  | 4.97947100  | -2.61921600 |
| H           | 3.48495400  | 3.45984500  | -0.76514300 |
| H           | 0.49240300  | 0.68428900  | -2.12031000 |
| H           | -0.10993600 | 2.21564400  | -3.95352800 |
| C           | 5.11525500  | -2.61617500 | -0.98750000 |
| C           | 4.11047200  | -2.20592200 | -1.86671600 |
| C           | 3.33326700  | -1.09056100 | -1.56347200 |
| C           | 3.53750700  | -0.38602300 | -0.36771200 |
| C           | 4.54111000  | -0.80728700 | 0.51480100  |
| C           | 5.33583300  | -1.90956600 | 0.19526700  |
| H           | 3.89645400  | -2.77326200 | -2.76607000 |
| H           | 2.53474100  | -0.80673900 | -2.23808400 |
| H           | 4.68433600  | -0.30018500 | 1.46254300  |
| H           | 6.11189700  | -2.22825300 | 0.88594600  |
| C           | 4.09088200  | 3.64119700  | 3.33096600  |
| C           | 4.90107700  | 3.20195600  | 2.28019300  |
| C           | 4.38654000  | 2.33783700  | 1.31495100  |
| C           | 3.05351700  | 1.90157500  | 1.39312400  |
| C           | 2.25383800  | 2.33834700  | 2.45733300  |
| C           | 2.76779100  | 3.20850400  | 3.41846800  |
| H           | 5.93375000  | 3.53258100  | 2.21323500  |
| H           | 5.02013300  | 1.99338200  | 0.50332300  |
| H           | 1.22238700  | 2.00845700  | 2.52158600  |
| H           | 2.13050300  | 3.54874500  | 4.22854400  |
| P           | 2.27346300  | 0.83598900  | 0.13066000  |
| C           | -3.37516700 | 2.52256300  | -3.56524200 |
| C           | -3.24012300 | 3.56123400  | -2.64251800 |
| C           | -2.71707800 | 3.30885000  | -1.37352100 |
| C           | -2.31879000 | 2.01233800  | -1.01972600 |
| C           | -2.46384900 | 0.96950600  | -1.94827200 |
| C           | -2.99307600 | 1.22595000  | -3.21204000 |
| H           | -3.54007100 | 4.57074300  | -2.90947000 |
| H           | -2.60089200 | 4.12402000  | -0.66716200 |
| H           | -2.18811600 | -0.04028300 | -1.66739100 |
| H           | -3.10336100 | 0.41072600  | -3.92163400 |

|    |             |             |             |
|----|-------------|-------------|-------------|
| C  | 0.27714000  | 5.55499000  | 2.21837100  |
| C  | 0.52110000  | 5.14341100  | 0.90616500  |
| C  | -0.08258100 | 3.99200100  | 0.40850400  |
| C  | -0.94629600 | 3.23505900  | 1.21750900  |
| C  | -1.19433200 | 3.65711600  | 2.53045000  |
| C  | -0.58359000 | 4.81133800  | 3.02614700  |
| H  | 1.19220600  | 5.71024000  | 0.26765000  |
| H  | 0.11920400  | 3.68165100  | -0.60945300 |
| H  | -1.86199800 | 3.08531500  | 3.16653300  |
| H  | -0.78591200 | 5.12904200  | 4.04539400  |
| C  | -4.89583000 | 0.56114500  | 3.60408500  |
| C  | -5.18787800 | 1.42072300  | 2.54182100  |
| C  | -4.20120400 | 1.74322500  | 1.60979500  |
| C  | -2.91719500 | 1.19899300  | 1.73255800  |
| C  | -2.63431500 | 0.32197900  | 2.78843000  |
| C  | -3.61785000 | 0.01244300  | 3.72707000  |
| H  | -6.18477000 | 1.84028900  | 2.43993300  |
| H  | -4.42787500 | 2.41121700  | 0.78423000  |
| H  | -1.64737200 | -0.12675700 | 2.86424500  |
| H  | -3.39102900 | -0.66847800 | 4.54239400  |
| P  | -1.55098400 | 1.61818800  | 0.59524200  |
| Cu | 0.13889000  | 0.06950900  | 0.54699600  |
| B  | -1.69864800 | -2.42862500 | 0.18208300  |
| O  | -2.74624800 | -1.56478800 | -0.12915600 |
| C  | -3.94586900 | -2.37169300 | -0.24431200 |
| C  | -3.36203900 | -3.82337800 | -0.43374800 |
| O  | -2.10884900 | -3.74194500 | 0.29149400  |
| C  | -3.00943800 | -4.14569900 | -1.89022200 |
| H  | -2.42412600 | -5.06873600 | -1.91304700 |
| H  | -3.90610000 | -4.27805200 | -2.50507100 |
| H  | -2.38655400 | -3.35948400 | -2.32613600 |
| C  | -4.20402500 | -4.93789300 | 0.17372200  |
| H  | -5.19411100 | -4.97692500 | -0.29485000 |
| H  | -3.70978700 | -5.89997900 | 0.00759800  |
| H  | -4.33001500 | -4.80257400 | 1.25026500  |
| C  | -4.76800800 | -1.84889200 | -1.41694200 |
| H  | -5.66546800 | -2.45985100 | -1.56546300 |
| H  | -5.08240500 | -0.81986800 | -1.21482700 |
| H  | -4.18897400 | -1.85072500 | -2.34293200 |
| C  | -4.72062200 | -2.20247100 | 1.06417900  |
| H  | -4.92085500 | -1.14065800 | 1.22542200  |
| H  | -5.67507500 | -2.73899500 | 1.04005200  |
| H  | -4.13539200 | -2.56869800 | 1.91246500  |
| C  | 0.04068100  | -2.02293200 | -0.99284800 |

|   |             |             |             |
|---|-------------|-------------|-------------|
| H | -0.26354800 | -1.14662500 | -1.55507700 |
| C | 0.58854900  | -3.13134400 | -1.69250900 |
| C | 0.91193100  | -2.97918600 | -3.07394100 |
| C | 1.47956300  | -4.00594200 | -3.81357000 |
| C | 1.76232400  | -5.24670900 | -3.22482400 |
| C | 1.43029300  | -5.42642300 | -1.87886800 |
| C | 0.85263100  | -4.40934200 | -1.12461700 |
| H | 0.70513300  | -2.02216100 | -3.55260000 |
| H | 1.70564700  | -3.83939700 | -4.86551700 |
| H | 2.21191800  | -6.04901900 | -3.80243000 |
| H | 1.61848300  | -6.38625200 | -1.40133800 |
| H | 0.57776700  | -4.60118400 | -0.09492500 |
| N | -0.34150900 | -1.96502800 | 0.43264700  |
| C | 0.47057400  | -2.44514400 | 1.49699000  |
| C | 1.83969000  | -2.69922300 | 1.33695900  |
| C | -0.12188100 | -2.62877500 | 2.75932600  |
| C | 2.60393000  | -3.08186000 | 2.43839700  |
| H | 2.28439200  | -2.60004100 | 0.35793900  |
| C | 0.65254500  | -3.01490100 | 3.84912000  |
| H | -1.19201900 | -2.47421100 | 2.86916400  |
| C | 2.02562800  | -3.23639700 | 3.69970400  |
| H | 3.66410100  | -3.27022000 | 2.29605500  |
| H | 0.18003400  | -3.14976500 | 4.81893300  |
| H | 2.62855800  | -3.54353900 | 4.54929500  |
| H | -3.77866800 | 2.72215200  | -4.55401500 |
| H | -5.66639000 | 0.31152800  | 4.32779800  |
| H | 4.49397600  | 4.31598500  | 4.08096500  |
| H | 5.71234800  | -3.49380500 | -1.21749900 |
| H | 1.09274000  | 4.38506800  | -4.20975400 |
| H | 0.75648000  | 6.44817400  | 2.60843800  |

#### IM10

|    |             |             |             |
|----|-------------|-------------|-------------|
| Cu | -4.21321300 | -4.00139400 | -0.32058400 |
| B  | -0.56760600 | -4.67835400 | 0.02776300  |
| O  | -0.70112700 | -3.96602000 | 1.20712900  |
| C  | -0.29650200 | -2.60217400 | 0.94542800  |
| C  | 0.60309100  | -2.74926300 | -0.33461300 |
| O  | 0.04858900  | -3.93009900 | -0.96526500 |
| C  | -1.98132700 | -6.46161100 | 0.87977500  |
| H  | -1.58438600 | -6.75331300 | 1.84773000  |
| C  | -3.32304800 | -6.46528100 | 0.61459300  |
| C  | -3.88551300 | -6.05058800 | -0.67457100 |
| C  | -5.21281800 | -6.46095400 | -1.02076400 |
| C  | -6.06480500 | -7.03149100 | -0.10361300 |

|   |             |             |             |
|---|-------------|-------------|-------------|
| C | -5.58830400 | -7.20894000 | 1.23780200  |
| C | -4.30405200 | -6.91138600 | 1.59497700  |
| H | -3.18983300 | -5.94485600 | -1.50017600 |
| H | -5.53327400 | -6.30443800 | -2.05011700 |
| H | -7.07666600 | -7.32161100 | -0.37106800 |
| H | -6.27062700 | -7.59526100 | 1.99277800  |
| H | -3.96348500 | -7.10240300 | 2.61028800  |
| C | 0.51454100  | -1.58959100 | -1.31844200 |
| H | -0.50322500 | -1.44846900 | -1.68199800 |
| H | 0.85133300  | -0.65778700 | -0.85029000 |
| H | 1.15766900  | -1.78821200 | -2.18160000 |
| C | 2.06569200  | -3.06649100 | -0.00653000 |
| H | 2.57939900  | -2.20276100 | 0.42790000  |
| H | 2.13903200  | -3.90428000 | 0.69400400  |
| H | 2.58329500  | -3.34782000 | -0.92870500 |
| C | 0.41748500  | -2.06873200 | 2.18335600  |
| H | 0.79034000  | -1.05279300 | 2.00988300  |
| H | -0.28630100 | -2.03807300 | 3.02129700  |
| H | 1.25666800  | -2.70603600 | 2.47015900  |
| C | -1.56933700 | -1.79769300 | 0.69354900  |
| H | -2.13307900 | -2.20629600 | -0.14899200 |
| H | -2.19690700 | -1.86429300 | 1.58212200  |
| H | -1.36235600 | -0.74359600 | 0.48982700  |
| N | -1.02559800 | -6.01628600 | -0.10683100 |
| C | -0.63644700 | -6.89597500 | -1.15179600 |
| C | 0.48444800  | -6.62888000 | -1.96118700 |
| C | -1.35689100 | -8.07862200 | -1.39211300 |
| C | 0.85475800  | -7.50855800 | -2.97701200 |
| H | 1.06130000  | -5.72923800 | -1.79740400 |
| C | -0.98097900 | -8.94737900 | -2.41433600 |
| H | -2.20679300 | -8.31026900 | -0.76369800 |
| C | 0.12528400  | -8.67407800 | -3.22004300 |
| H | 1.73065200  | -7.27800200 | -3.57898300 |
| H | -1.56513100 | -9.84934000 | -2.57843800 |
| H | 0.41677700  | -9.35606700 | -4.01376300 |
| C | -8.45192900 | -1.57675900 | -2.83154700 |
| C | -8.11056500 | -2.76364600 | -2.17715800 |
| C | -6.77864800 | -3.16916000 | -2.12403900 |
| C | -5.76911400 | -2.39007200 | -2.71642300 |
| C | -6.12217100 | -1.21157200 | -3.38590600 |
| C | -7.45773000 | -0.80905300 | -3.44236000 |
| H | -8.87157900 | -3.35903200 | -1.68171300 |
| H | -6.51761900 | -4.08091800 | -1.59492400 |
| H | -5.35121100 | -0.59718400 | -3.83871200 |



|   |             |             |             |
|---|-------------|-------------|-------------|
| H | -7.72056900 | 0.11050200  | -3.95825100 |
| C | -3.00457300 | -6.25919800 | -5.39644600 |
| C | -4.22829200 | -5.59988000 | -5.52054700 |
| C | -4.54658900 | -4.54360100 | -4.66444600 |
| C | -3.63678900 | -4.14547500 | -3.67731000 |
| C | -2.40306400 | -4.80924600 | -3.56088000 |
| C | -2.08873900 | -5.85995700 | -4.41956200 |
| H | -4.94077300 | -5.90898900 | -6.28056900 |
| H | -5.50235500 | -4.03749000 | -4.75764700 |
| H | -1.69587800 | -4.52006400 | -2.78748400 |
| H | -1.14663300 | -6.38310400 | -4.29924200 |
| C | -1.53804000 | 0.87104800  | -3.46851100 |
| C | -1.50496300 | -0.22998300 | -4.32557500 |
| C | -2.26148200 | -1.36812400 | -4.03986300 |
| C | -3.05159700 | -1.41620200 | -2.88380400 |
| C | -3.07216600 | -0.30887300 | -2.02017600 |
| C | -2.32880200 | 0.83049100  | -2.31693800 |
| H | -0.89043700 | -0.20518900 | -5.22111600 |
| H | -2.23197400 | -2.22126300 | -4.70914300 |
| H | -3.66574700 | -0.34131200 | -1.11537100 |
| H | -2.36253200 | 1.67920800  | -1.63996500 |
| P | -4.03143500 | -2.89083800 | -2.41233500 |
| C | -9.73792200 | -3.62083300 | 1.83812700  |
| C | -9.25735800 | -2.36184400 | 2.20803400  |
| C | -7.90418900 | -2.05838400 | 2.06458500  |
| C | -7.01826300 | -3.01450200 | 1.54626200  |
| C | -7.50508600 | -4.27377500 | 1.17716500  |
| C | -8.85887800 | -4.57622400 | 1.32580800  |
| H | -9.93804000 | -1.61417300 | 2.60577700  |
| H | -7.54303400 | -1.07069400 | 2.33280200  |
| H | -6.82960200 | -5.01641000 | 0.76645400  |
| H | -9.22170300 | -5.55815800 | 1.03451700  |
| C | -5.07345500 | 1.83702300  | 0.29341100  |
| C | -5.98772800 | 0.98910100  | -0.33724200 |
| C | -6.05503600 | -0.35649000 | 0.01501000  |
| C | -5.21073400 | -0.87756700 | 1.01188500  |
| C | -4.30935200 | -0.01660400 | 1.65222200  |
| C | -4.23810900 | 1.33060400  | 1.29006400  |
| H | -6.64324700 | 1.36812500  | -1.11546600 |
| H | -6.76409000 | -1.00326100 | -0.48813400 |
| H | -3.66537200 | -0.39593100 | 2.43732800  |
| H | -3.53178900 | 1.98415800  | 1.79454800  |
| C | -3.16773200 | -3.24913600 | 5.41539600  |
| C | -4.28922100 | -2.41736500 | 5.32667700  |

|   |              |             |             |
|---|--------------|-------------|-------------|
| C | -4.93390400  | -2.24347300 | 4.10404000  |
| C | -4.46141900  | -2.90288300 | 2.95892700  |
| C | -3.34893300  | -3.74957200 | 3.05656100  |
| C | -2.70011400  | -3.91354100 | 4.28183300  |
| H | -4.65879000  | -1.90489000 | 6.21054500  |
| H | -5.80300900  | -1.59578300 | 4.03840700  |
| H | -2.97243600  | -4.27496500 | 2.18593600  |
| H | -1.82931000  | -4.55988900 | 4.33487500  |
| P | -5.22831500  | -2.69204000 | 1.31105700  |
| H | -10.79380700 | -3.85257600 | 1.94747100  |
| H | -2.66410000  | -3.37776600 | 6.36958500  |
| H | -0.94748500  | 1.75451300  | -3.69416200 |
| H | -2.76632800  | -7.09164700 | -6.05254400 |
| H | -9.48758200  | -1.25042100 | -2.86177900 |
| H | -5.01639700  | 2.88493100  | 0.01290400  |

**TS7**

|    |             |             |             |
|----|-------------|-------------|-------------|
| Cu | -4.27003300 | -4.12547300 | -0.37730700 |
| B  | -0.50104300 | -4.28175100 | -0.13728600 |
| O  | -0.71971600 | -3.42973900 | 0.93418500  |
| C  | 0.03629400  | -2.21747200 | 0.69451100  |
| C  | 1.14803300  | -2.71237600 | -0.29646200 |
| O  | 0.48014100  | -3.79996400 | -0.98572500 |
| C  | -2.18079900 | -5.75335300 | 0.78350700  |
| H  | -1.80553600 | -5.66894300 | 1.79697000  |
| C  | -3.48648600 | -6.15490800 | 0.56726600  |
| C  | -4.11589800 | -6.28091300 | -0.74632500 |
| C  | -5.39303900 | -6.88021400 | -0.87674300 |
| C  | -6.14141000 | -7.26681300 | 0.21855000  |
| C  | -5.60031500 | -7.02052300 | 1.51462100  |
| C  | -4.36199500 | -6.46203300 | 1.69091300  |
| H  | -3.49051100 | -6.23671300 | -1.62949100 |
| H  | -5.77078300 | -7.04501100 | -1.88470400 |
| H  | -7.11706700 | -7.72916500 | 0.10402500  |
| H  | -6.19260300 | -7.26856500 | 2.39331100  |
| H  | -3.97353300 | -6.30442200 | 2.69366000  |
| C  | 1.59242100  | -1.68582000 | -1.33207500 |
| H  | 0.75818700  | -1.35842300 | -1.95551700 |
| H  | 2.03137700  | -0.80887300 | -0.84274200 |
| H  | 2.35372800  | -2.12782900 | -1.98292600 |
| C  | 2.36159000  | -3.31762800 | 0.41624300  |
| H  | 2.96277600  | -2.54920600 | 0.91300900  |
| H  | 2.05088700  | -4.05468700 | 1.16335600  |
| H  | 2.98857200  | -3.82750900 | -0.32099200 |

|   |             |             |             |
|---|-------------|-------------|-------------|
| C | 0.54094300  | -1.69694800 | 2.03518600  |
| H | 1.16847900  | -0.80933800 | 1.89663800  |
| H | -0.31259500 | -1.41625800 | 2.66107700  |
| H | 1.11825300  | -2.45457700 | 2.57001200  |
| C | -0.92030000 | -1.21706200 | 0.05150200  |
| H | -1.28396900 | -1.59264900 | -0.90524000 |
| H | -1.78595300 | -1.06914900 | 0.70192300  |
| H | -0.44749000 | -0.24497400 | -0.11802300 |
| N | -1.21111000 | -5.51119800 | -0.26074700 |
| C | -0.81284100 | -6.57708600 | -1.11717800 |
| C | 0.04210800  | -6.36284300 | -2.21649000 |
| C | -1.29161700 | -7.88011700 | -0.89735400 |
| C | 0.40478200  | -7.42064300 | -3.04898300 |
| H | 0.43000900  | -5.37300900 | -2.41225400 |
| C | -0.92830400 | -8.92638700 | -1.74221200 |
| H | -1.94495000 | -8.06256300 | -0.05427500 |
| C | -0.07915500 | -8.71128400 | -2.82798600 |
| H | 1.07601200  | -7.22528700 | -3.88228000 |
| H | -1.31897500 | -9.92121400 | -1.54406300 |
| H | 0.20030400  | -9.52938300 | -3.48563300 |
| C | -8.52872400 | -1.59298900 | -2.79880000 |
| C | -8.20700600 | -2.79636400 | -2.16630100 |
| C | -6.88039600 | -3.22079200 | -2.11351700 |
| C | -5.85754600 | -2.44329900 | -2.68133800 |
| C | -6.19181800 | -1.25016700 | -3.33467500 |
| C | -7.52092400 | -0.82788200 | -3.39046400 |
| H | -8.97907400 | -3.39220400 | -1.68938700 |
| H | -6.62994200 | -4.14817300 | -1.60690400 |
| H | -5.41262700 | -0.64012500 | -3.77823000 |
| H | -7.76808100 | 0.10357000  | -3.89247800 |
| C | -3.30585200 | -6.01448000 | -5.86740800 |
| C | -4.40703900 | -5.16104300 | -5.96461300 |
| C | -4.67197600 | -4.23768700 | -4.95248200 |
| C | -3.83409900 | -4.16842100 | -3.83236600 |
| C | -2.72826700 | -5.02649000 | -3.74179100 |
| C | -2.46182700 | -5.94374200 | -4.75696000 |
| H | -5.06373500 | -5.21511600 | -6.82868100 |
| H | -5.53062400 | -3.57837800 | -5.02924700 |
| H | -2.08117300 | -4.98537800 | -2.87193700 |
| H | -1.61169600 | -6.61070000 | -4.65795400 |
| C | -1.43249000 | 0.66190800  | -3.21611000 |
| C | -1.19304700 | -0.52549600 | -3.90916900 |
| C | -2.02318700 | -1.63319100 | -3.72145800 |
| C | -3.09784000 | -1.56442600 | -2.82506400 |

|   |              |             |             |
|---|--------------|-------------|-------------|
| C | -3.32234600  | -0.37177800 | -2.11823800 |
| C | -2.50442600  | 0.73563200  | -2.32259400 |
| H | -0.36158500  | -0.59250300 | -4.60527500 |
| H | -1.83166600  | -2.54836000 | -4.27124800 |
| H | -4.13281400  | -0.31085500 | -1.40400000 |
| H | -2.70013300  | 1.64882300  | -1.76813700 |
| P | -4.13426600  | -3.02841900 | -2.43604700 |
| C | -9.86511200  | -3.69433100 | 1.77791100  |
| C | -9.33169500  | -2.49250900 | 2.25152100  |
| C | -7.96867900  | -2.23144900 | 2.11825100  |
| C | -7.12545400  | -3.17137300 | 1.50505600  |
| C | -7.66587400  | -4.37370400 | 1.03414300  |
| C | -9.02960700  | -4.63483100 | 1.17371400  |
| H | -9.97795600  | -1.75784800 | 2.72380600  |
| H | -7.56155400  | -1.29093500 | 2.47577000  |
| H | -7.02220900  | -5.11008600 | 0.56611100  |
| H | -9.43390200  | -5.57417500 | 0.80662700  |
| C | -5.08608700  | 1.67489400  | 0.40166300  |
| C | -6.08573500  | 0.89143800  | -0.18066200 |
| C | -6.17445000  | -0.46822900 | 0.11388700  |
| C | -5.26988900  | -1.06390500 | 1.00911400  |
| C | -4.27661300  | -0.26964000 | 1.59695000  |
| C | -4.18193400  | 1.08887900  | 1.28921900  |
| H | -6.79285600  | 1.33168300  | -0.87768800 |
| H | -6.95037700  | -1.06382100 | -0.35296400 |
| H | -3.58159900  | -0.71171400 | 2.30326900  |
| H | -3.40416400  | 1.68997100  | 1.75194700  |
| C | -3.27276500  | -3.48278600 | 5.37905500  |
| C | -4.66208700  | -3.34244700 | 5.33474900  |
| C | -5.31157300  | -3.15689500 | 4.11414600  |
| C | -4.57195800  | -3.11837000 | 2.92533900  |
| C | -3.17772800  | -3.27246200 | 2.97071100  |
| C | -2.53322300  | -3.44496000 | 4.19567500  |
| H | -5.24280400  | -3.38083600 | 6.25232700  |
| H | -6.39152800  | -3.05707700 | 4.08657300  |
| H | -2.59209100  | -3.29032900 | 2.05824300  |
| H | -1.45402000  | -3.56821000 | 4.21259900  |
| P | -5.33074100  | -2.88680000 | 1.27653100  |
| H | -10.92820600 | -3.89411200 | 1.88048800  |
| H | -2.77187500  | -3.62931700 | 6.33208400  |
| H | -0.78612400  | 1.52176300  | -3.36767200 |
| H | -3.10940400  | -6.73839400 | -6.65340500 |
| H | -9.56000500  | -1.25300700 | -2.83012000 |
| H | -5.01490400  | 2.73341700  | 0.16781200  |

TS8<sup>oss</sup>

|    |             |             |             |
|----|-------------|-------------|-------------|
| C  | -3.13211800 | -0.31919200 | 4.66017500  |
| C  | -3.91583000 | -0.85044500 | 3.63471700  |
| C  | -3.56971500 | -0.62987600 | 2.29987000  |
| C  | -2.43331600 | 0.12383100  | 1.98676000  |
| C  | -1.64583600 | 0.65631700  | 3.02003000  |
| C  | -1.99832700 | 0.43787600  | 4.34987100  |
| H  | -4.79710800 | -1.44000900 | 3.87198900  |
| H  | -4.17376200 | -1.05446500 | 1.50466000  |
| H  | -0.75332200 | 1.22679600  | 2.77598300  |
| H  | -1.38492700 | 0.85516200  | 5.14311900  |
| C  | -4.39718800 | -2.39194900 | -2.40318100 |
| C  | -3.29685200 | -2.86883600 | -1.68518000 |
| C  | -2.56208600 | -2.00250100 | -0.87931200 |
| C  | -2.93354700 | -0.65474600 | -0.76301400 |
| C  | -4.04067400 | -0.18211300 | -1.47801900 |
| C  | -4.76462200 | -1.04923900 | -2.29941100 |
| H  | -3.00126800 | -3.91172100 | -1.75963600 |
| H  | -1.69057500 | -2.36729800 | -0.34987700 |
| H  | -4.33030500 | 0.86087100  | -1.40297500 |
| H  | -5.61751800 | -0.67385000 | -2.85806400 |
| C  | -3.17849100 | 4.70905400  | -0.78290300 |
| C  | -3.92543500 | 3.97409700  | 0.14075900  |
| C  | -3.53812500 | 2.67763400  | 0.47999200  |
| C  | -2.39741900 | 2.10809900  | -0.10294100 |
| C  | -1.64253800 | 2.85792000  | -1.01456600 |
| C  | -2.03643300 | 4.15037500  | -1.35958700 |
| H  | -4.80513500 | 4.41285000  | 0.60274700  |
| H  | -4.11389800 | 2.10834400  | 1.20340100  |
| H  | -0.72804500 | 2.43923500  | -1.41949700 |
| H  | -1.43934700 | 4.72740100  | -2.05960800 |
| P  | -1.85786300 | 0.40238300  | 0.27285800  |
| Cu | 0.42653500  | -0.00186600 | 0.08258400  |
| B  | 1.98541000  | -1.54975500 | -1.89796400 |
| O  | 2.42863200  | -1.88864500 | -3.15242100 |
| C  | 1.35267300  | -1.56104800 | -4.07860400 |
| C  | 0.60015000  | -0.41599700 | -3.32143600 |
| O  | 0.77962700  | -0.85051200 | -1.93669000 |
| C  | -0.88619300 | -0.30307700 | -3.62165900 |
| H  | -1.42576800 | -1.21479300 | -3.36346900 |
| H  | -1.32227100 | 0.51815100  | -3.04647400 |
| H  | -1.03848500 | -0.08708900 | -4.68506400 |
| C  | 1.29109600  | 0.94309800  | -3.45140800 |
| H  | 1.12449600  | 1.38021300  | -4.44090300 |

|   |             |             |             |
|---|-------------|-------------|-------------|
| H | 0.89154700  | 1.62303300  | -2.69450500 |
| H | 2.36818500  | 0.85947900  | -3.28038100 |
| C | 0.49635000  | -2.82102500 | -4.23645900 |
| H | 1.13749800  | -3.64812400 | -4.55470400 |
| H | 0.02233600  | -3.09596000 | -3.28883500 |
| H | -0.28822500 | -2.67980000 | -4.98647100 |
| C | 1.96959000  | -1.15238100 | -5.40884200 |
| H | 2.69066000  | -0.34220400 | -5.28240500 |
| H | 2.49088500  | -2.00697700 | -5.85081300 |
| H | 1.19304800  | -0.82651400 | -6.10964500 |
| C | 1.89142500  | -1.51739500 | 0.54694800  |
| H | 2.50625500  | -1.05228500 | 1.31252100  |
| C | 0.84915900  | -2.42451800 | 1.00309900  |
| C | 0.17070800  | -2.16210900 | 2.22210500  |
| C | -0.86295900 | -2.97792800 | 2.65894800  |
| C | -1.23917700 | -4.10370200 | 1.91471200  |
| C | -0.55770100 | -4.40029700 | 0.72916000  |
| C | 0.46018800  | -3.57144300 | 0.26754900  |
| H | 0.45425600  | -1.28766800 | 2.79991700  |
| H | -1.38614100 | -2.72819500 | 3.57687800  |
| H | -2.04724300 | -4.74271400 | 2.25758100  |
| H | -0.82623600 | -5.28484900 | 0.15695000  |
| H | 0.99066000  | -3.81706300 | -0.64666100 |
| N | 2.60839100  | -1.83467000 | -0.65609300 |
| C | 3.89955600  | -2.41097000 | -0.52274300 |
| C | 4.20339300  | -3.19454100 | 0.60030500  |
| C | 4.88995400  | -2.19363100 | -1.49299800 |
| C | 5.47299900  | -3.75150600 | 0.74539700  |
| H | 3.43966600  | -3.37839000 | 1.34775300  |
| C | 6.15046700  | -2.76542600 | -1.34388000 |
| H | 4.66617900  | -1.58129300 | -2.35791100 |
| C | 6.45361100  | -3.54418700 | -0.22468100 |
| H | 5.69037000  | -4.35700300 | 1.62106300  |
| H | 6.90655100  | -2.58732800 | -2.10375400 |
| H | 7.44165300  | -3.98004200 | -0.10987400 |
| H | -3.47762400 | 5.72108000  | -1.04011500 |
| H | -4.96324600 | -3.06270800 | -3.04345400 |
| H | -3.40235700 | -0.49369900 | 5.69781400  |
| I | 1.71477400  | 2.11263300  | 0.91111600  |
| C | -2.06201100 | 4.12265100  | 3.91969900  |
| H | -2.07661400 | 3.69096100  | 4.92708600  |
| H | -2.61569200 | 3.44438200  | 3.26084300  |
| H | -2.60878600 | 5.07354600  | 3.95391300  |
| C | -0.63262400 | 4.32722500  | 3.41330600  |

|   |             |            |            |
|---|-------------|------------|------------|
| H | -0.08629000 | 4.99299000 | 4.09604800 |
| H | -0.09072600 | 3.37403500 | 3.41357800 |
| C | -0.59185600 | 4.90667400 | 1.99447600 |
| H | -1.15555700 | 5.86122000 | 1.98845400 |
| H | -1.14821200 | 4.24702600 | 1.31848600 |
| C | 0.78178600  | 5.12290500 | 1.46161600 |
| H | 1.61273400  | 5.32242600 | 2.13087500 |
| H | 0.93439100  | 5.32448300 | 0.40722000 |

**IM11**

|    |             |             |             |
|----|-------------|-------------|-------------|
| C  | 4.12718100  | 3.90109900  | -1.73514500 |
| C  | 3.45498700  | 2.74260100  | -2.13672700 |
| C  | 3.86595200  | 1.49745100  | -1.66529400 |
| C  | 4.95108100  | 1.40402000  | -0.77910600 |
| C  | 5.61844400  | 2.56526800  | -0.37506900 |
| C  | 5.20556900  | 3.81057600  | -0.85382100 |
| H  | 2.61670900  | 2.80842700  | -2.82434200 |
| H  | 3.35971900  | 0.59163800  | -1.99242600 |
| H  | 6.46710700  | 2.49538600  | 0.29793300  |
| H  | 5.72957600  | 4.70919800  | -0.53987300 |
| C  | 9.63766500  | 0.31604300  | 1.62804900  |
| C  | 8.52869100  | 0.26340400  | 2.47445000  |
| C  | 7.24755200  | 0.08931900  | 1.94662700  |
| C  | 7.07127200  | -0.04328300 | 0.56308500  |
| C  | 8.19160300  | -0.00922600 | -0.28132200 |
| C  | 9.46588600  | 0.18283900  | 0.24792000  |
| H  | 8.65884800  | 0.35966900  | 3.54877300  |
| H  | 6.38905700  | 0.05232400  | 2.60896600  |
| H  | 8.06483400  | -0.13921000 | -1.34907400 |
| H  | 10.32024200 | 0.22110200  | -0.42158900 |
| C  | 2.52268400  | -1.34535800 | 3.17184600  |
| C  | 2.96571700  | -0.02658100 | 3.03881200  |
| C  | 3.83813700  | 0.31543200  | 2.00691700  |
| C  | 4.28082300  | -0.66382900 | 1.10468800  |
| C  | 3.81901500  | -1.98035600 | 1.23232600  |
| C  | 2.94577900  | -2.31911500 | 2.26643500  |
| H  | 2.62498500  | 0.73576300  | 3.73377000  |
| H  | 4.16786000  | 1.34394300  | 1.89189600  |
| H  | 4.11518200  | -2.72633400 | 0.50158000  |
| H  | 2.58435500  | -3.33965200 | 2.35217400  |
| P  | 5.44701100  | -0.27553200 | -0.24784300 |
| Cu | 5.37859100  | -1.75739100 | -1.94426000 |
| B  | 7.16059000  | -3.41411300 | -3.62617500 |
| O  | 7.62142400  | -4.69503700 | -3.72310400 |

|   |             |             |             |
|---|-------------|-------------|-------------|
| C | 7.70924000  | -5.21499000 | -2.36188000 |
| C | 7.89861900  | -3.90744300 | -1.50711800 |
| O | 7.20678300  | -2.91604800 | -2.32961800 |
| C | 9.35300600  | -3.44727800 | -1.40627800 |
| H | 9.37942000  | -2.44422800 | -0.97394400 |
| H | 9.93491800  | -4.11653600 | -0.76509800 |
| H | 9.82573100  | -3.41271900 | -2.39255700 |
| C | 7.24137000  | -3.92940900 | -0.13447700 |
| H | 7.67841800  | -4.71900500 | 0.48630400  |
| H | 7.40410500  | -2.97072000 | 0.36691100  |
| H | 6.16596200  | -4.10086300 | -0.21422300 |
| C | 8.87804300  | -6.18896800 | -2.29926500 |
| H | 9.02125700  | -6.55213600 | -1.27559400 |
| H | 8.66948600  | -7.05060300 | -2.94028500 |
| H | 9.80652400  | -5.72742300 | -2.64174700 |
| C | 6.38743400  | -5.93017000 | -2.07499900 |
| H | 6.23864800  | -6.70952900 | -2.82843100 |
| H | 6.39819100  | -6.40420700 | -1.08827100 |
| H | 5.53826800  | -5.24100100 | -2.12683000 |
| C | 6.30286600  | -1.26555200 | -4.42616200 |
| H | 5.32023900  | -0.96424500 | -4.77593800 |
| C | 7.23717100  | -0.27985000 | -3.99681600 |
| C | 6.77860700  | 1.02789800  | -3.67792800 |
| C | 7.66112700  | 2.01569600  | -3.26886900 |
| C | 9.03342500  | 1.74716800  | -3.17229600 |
| C | 9.50754700  | 0.46876300  | -3.49618500 |
| C | 8.63216900  | -0.53284700 | -3.89329700 |
| H | 5.71698100  | 1.24250600  | -3.74314300 |
| H | 7.27665900  | 2.99829200  | -3.01418300 |
| H | 9.72270300  | 2.52239600  | -2.85194500 |
| H | 10.57223000 | 0.25631900  | -3.44206900 |
| H | 9.01272700  | -1.51083900 | -4.16644900 |
| N | 6.64889100  | -2.60556700 | -4.68504400 |
| C | 6.18388500  | -3.15029200 | -5.91883500 |
| C | 6.32294100  | -2.39140000 | -7.08755500 |
| C | 5.56630000  | -4.40553100 | -5.97356100 |
| C | 5.85486600  | -2.88709900 | -8.30305200 |
| H | 6.80928800  | -1.42194700 | -7.03445700 |
| C | 5.11343300  | -4.89786600 | -7.19496800 |
| H | 5.42253900  | -4.97375200 | -5.06364500 |
| C | 5.25268900  | -4.14462600 | -8.36310000 |
| H | 5.96919400  | -2.29139900 | -9.20437100 |
| H | 4.62921500  | -5.86963300 | -7.22889800 |
| H | 4.88866200  | -4.53226700 | -9.31010000 |



|   |             |             |             |
|---|-------------|-------------|-------------|
| H | 1.83724200  | -1.60874000 | 3.97247000  |
| H | 10.63197700 | 0.45534800  | 2.04301900  |
| H | 3.81125700  | 4.87031700  | -2.11038500 |
| I | 3.33446800  | -3.07934800 | -2.77283600 |

**IM12**

|    |             |             |             |
|----|-------------|-------------|-------------|
| C  | 3.86146400  | 2.91842500  | 1.92501500  |
| C  | 3.34342800  | 1.92436300  | 1.09383800  |
| C  | 4.20180300  | 1.08946400  | 0.37798700  |
| C  | 5.58909500  | 1.25723600  | 0.48738400  |
| C  | 6.10725300  | 2.25451800  | 1.32662800  |
| C  | 5.24415300  | 3.08244600  | 2.04252100  |
| H  | 2.26953900  | 1.78545600  | 1.01109900  |
| H  | 3.79864700  | 0.30507000  | -0.25245100 |
| H  | 7.18216800  | 2.37540000  | 1.42216700  |
| H  | 5.64933400  | 3.85118100  | 2.69465000  |
| C  | 7.89269800  | 2.64993400  | -4.23152200 |
| C  | 7.07092800  | 3.23223600  | -3.26595600 |
| C  | 6.71967500  | 2.52115200  | -2.11602500 |
| C  | 7.18108300  | 1.21218600  | -1.92759300 |
| C  | 7.99606400  | 0.62691700  | -2.91087000 |
| C  | 8.35881000  | 1.34492700  | -4.04827200 |
| H  | 6.70190300  | 4.24460000  | -3.40415300 |
| H  | 6.08327900  | 2.98171600  | -1.36836200 |
| H  | 8.34521400  | -0.39228600 | -2.77774100 |
| H  | 8.99661000  | 0.88343500  | -4.79718900 |
| C  | 10.42942100 | -0.39852700 | 2.15556000  |
| C  | 9.17699800  | -0.87832300 | 2.55075700  |
| C  | 8.06216700  | -0.68452900 | 1.73932200  |
| C  | 8.18716500  | 0.01084900  | 0.52496200  |
| C  | 9.44088400  | 0.49344200  | 0.13389100  |
| C  | 10.55790200 | 0.28449300  | 0.94651400  |
| H  | 9.06817600  | -1.41311900 | 3.49021400  |
| H  | 7.09644000  | -1.08515700 | 2.03447000  |
| H  | 9.54981100  | 1.03133300  | -0.80150400 |
| H  | 11.52712800 | 0.66339600  | 0.63361500  |
| P  | 6.67862000  | 0.17706400  | -0.49968400 |
| Cu | 5.66552000  | -1.89978100 | -1.14768900 |
| B  | 5.31988700  | -5.67257600 | -1.04071400 |
| O  | 4.27276400  | -6.54531000 | -0.89645500 |
| C  | 4.55062200  | -7.34720100 | 0.28401200  |
| C  | 6.11552700  | -7.20952200 | 0.42939800  |
| O  | 6.39108500  | -5.94670600 | -0.23609100 |
| C  | 6.89609400  | -8.27994700 | -0.33788000 |

|   |             |             |             |
|---|-------------|-------------|-------------|
| H | 7.95591300  | -8.00826300 | -0.34438200 |
| H | 6.79229100  | -9.26528800 | 0.12746600  |
| H | 6.55634500  | -8.34723800 | -1.37606300 |
| C | 6.61848100  | -7.10213300 | 1.86416900  |
| H | 6.36889500  | -8.00511200 | 2.43238200  |
| H | 7.70754900  | -6.99040400 | 1.86285100  |
| H | 6.18689500  | -6.23488900 | 2.36771400  |
| C | 4.05566800  | -8.76562700 | 0.02145500  |
| H | 4.29856800  | -9.42242500 | 0.86422500  |
| H | 2.96805200  | -8.75355900 | -0.09746400 |
| H | 4.49075600  | -9.18582600 | -0.88790600 |
| C | 3.77255200  | -6.71834800 | 1.44146500  |
| H | 2.70991200  | -6.70143800 | 1.18099200  |
| H | 3.89346300  | -7.29609700 | 2.36367700  |
| H | 4.08915200  | -5.68732100 | 1.61982100  |
| C | 6.17461600  | -3.61556600 | -2.33331200 |
| H | 6.09048400  | -3.31358400 | -3.36949300 |
| C | 7.55088000  | -3.45272900 | -1.83345200 |
| C | 8.50076700  | -2.97461800 | -2.76804600 |
| C | 9.79579500  | -2.65328700 | -2.38076300 |
| C | 10.17813500 | -2.78550700 | -1.04140000 |
| C | 9.25730400  | -3.25975600 | -0.10871400 |
| C | 7.95720100  | -3.58805600 | -0.48738900 |
| H | 8.20585800  | -2.86585300 | -3.80881000 |
| H | 10.50668400 | -2.29526400 | -3.12048100 |
| H | 11.18093800 | -2.51295100 | -0.72828300 |
| H | 9.54045600  | -3.34819700 | 0.93425100  |
| H | 7.25418800  | -3.93301700 | 0.25451600  |
| N | 5.27244600  | -4.64321300 | -2.04869100 |
| C | 4.05542100  | -4.52620800 | -2.81188700 |
| C | 4.07044200  | -4.79990000 | -4.18140000 |
| C | 2.89148300  | -4.06926600 | -2.19242400 |
| C | 2.91425000  | -4.60936000 | -4.93922400 |
| H | 4.98384100  | -5.16814200 | -4.64070100 |
| C | 1.73748700  | -3.88775300 | -2.95415800 |
| H | 2.91241100  | -3.84045100 | -1.13284300 |
| C | 1.74629400  | -4.15100900 | -4.32523800 |
| H | 2.92410500  | -4.82756700 | -6.00340700 |
| H | 0.83355200  | -3.52463200 | -2.47429800 |
| H | 0.84599600  | -4.00149900 | -4.91437100 |
| H | 11.29871100 | -0.55619700 | 2.78797700  |
| H | 8.16532700  | 3.20589200  | -5.12382400 |
| H | 3.18987400  | 3.56078100  | 2.48799700  |
| I | 4.63815100  | -2.70942100 | 1.19092800  |

|   |            |             |             |
|---|------------|-------------|-------------|
| C | 5.21074800 | 1.74611400  | -6.82908900 |
| H | 4.13190500 | 1.91934300  | -6.92158100 |
| H | 5.65181400 | 1.83557300  | -7.82836500 |
| H | 5.62332600 | 2.54605300  | -6.20337000 |
| C | 5.49740200 | 0.37652200  | -6.20874400 |
| H | 5.10694000 | -0.41794400 | -6.86028100 |
| H | 6.58359800 | 0.22398600  | -6.14850400 |
| C | 4.89590300 | 0.23582700  | -4.80864500 |
| H | 3.80658300 | 0.34939600  | -4.84771400 |
| H | 5.27283800 | 1.04215400  | -4.16948600 |
| C | 5.23515300 | -1.11132000 | -4.16234700 |
| H | 6.31730400 | -1.26852400 | -4.13586700 |
| H | 4.79863700 | -1.94356900 | -4.73433400 |
| O | 3.64208700 | -0.73396700 | -2.40783800 |
| C | 4.68380800 | -1.23506700 | -2.75067700 |

**TS9**

|   |             |             |             |
|---|-------------|-------------|-------------|
| C | 3.80009500  | 3.15374800  | 1.24676600  |
| C | 3.31938000  | 2.13746200  | 0.41997200  |
| C | 4.20312400  | 1.21379200  | -0.13823300 |
| C | 5.57686700  | 1.31321400  | 0.12197800  |
| C | 6.05471500  | 2.32895600  | 0.96235600  |
| C | 5.16724800  | 3.24726900  | 1.52090200  |
| H | 2.25537400  | 2.04994800  | 0.22177000  |
| H | 3.82429500  | 0.40311600  | -0.75259400 |
| H | 7.11666100  | 2.39245800  | 1.18126800  |
| H | 5.54000400  | 4.03137200  | 2.17391700  |
| C | 8.88133200  | 2.33871200  | -4.09101200 |
| C | 7.99225500  | 3.04768700  | -3.28228400 |
| C | 7.32012200  | 2.40480800  | -2.24011000 |
| C | 7.52680400  | 1.03990500  | -2.00561000 |
| C | 8.40884800  | 0.32809900  | -2.83373900 |
| C | 9.08959500  | 0.97571700  | -3.86231800 |
| H | 7.82195800  | 4.10595500  | -3.45833600 |
| H | 6.63778800  | 2.96487600  | -1.60983900 |
| H | 8.57225500  | -0.72996700 | -2.66410900 |
| H | 9.77613400  | 0.41286600  | -4.48869900 |
| C | 10.05386700 | -0.78596600 | 2.40318600  |
| C | 8.75049800  | -1.24948200 | 2.60313900  |
| C | 7.74706400  | -0.94576100 | 1.68542000  |
| C | 8.03948100  | -0.16734000 | 0.55385000  |
| C | 9.34343200  | 0.30799200  | 0.36446900  |
| C | 10.34546300 | -0.00364200 | 1.28540300  |
| H | 8.51269300  | -1.85672500 | 3.47195400  |

|    |             |             |             |
|----|-------------|-------------|-------------|
| H  | 6.74218600  | -1.33000100 | 1.83338600  |
| H  | 9.58324800  | 0.91050200  | -0.50421700 |
| H  | 11.35444300 | 0.36687200  | 1.12619900  |
| P  | 6.69439800  | 0.10741800  | -0.66496200 |
| Cu | 5.55227200  | -1.87392200 | -1.20028900 |
| B  | 5.21733300  | -5.56545200 | -1.05253500 |
| O  | 4.34414500  | -6.59732500 | -0.81769600 |
| C  | 4.75125300  | -7.23099600 | 0.42383700  |
| C  | 6.25934800  | -6.78347800 | 0.56105600  |
| O  | 6.30883200  | -5.56677300 | -0.22830800 |
| C  | 7.24881500  | -7.75525700 | -0.08775300 |
| H  | 8.23572100  | -7.28370900 | -0.11847300 |
| H  | 7.32653300  | -8.69027200 | 0.47616500  |
| H  | 6.95402500  | -7.99017100 | -1.11511200 |
| C  | 6.69833400  | -6.43807600 | 1.97988600  |
| H  | 6.60803100  | -7.30889700 | 2.63877400  |
| H  | 7.74746800  | -6.12469000 | 1.97132200  |
| H  | 6.10150500  | -5.61926200 | 2.38613800  |
| C  | 4.54422500  | -8.73544300 | 0.27716000  |
| H  | 4.89183100  | -9.26331100 | 1.17226300  |
| H  | 3.47739000  | -8.94372700 | 0.15199600  |
| H  | 5.07103900  | -9.13381300 | -0.59252600 |
| C  | 3.84356700  | -6.67879900 | 1.52528100  |
| H  | 2.80346600  | -6.89160300 | 1.25978200  |
| H  | 4.05669900  | -7.14937400 | 2.49078000  |
| H  | 3.95068900  | -5.59571400 | 1.62449000  |
| C  | 5.81277300  | -3.61235100 | -2.61227500 |
| H  | 5.65951300  | -3.47503700 | -3.67823400 |
| C  | 7.26370400  | -3.46244700 | -2.29917900 |
| C  | 8.13488000  | -3.29705100 | -3.39489000 |
| C  | 9.49465100  | -3.05867100 | -3.20808000 |
| C  | 10.01340400 | -2.94258100 | -1.91557300 |
| C  | 9.16291600  | -3.08681800 | -0.81846800 |
| C  | 7.80763100  | -3.35839800 | -0.99943700 |
| H  | 7.73528400  | -3.36617600 | -4.40313100 |
| H  | 10.14581600 | -2.95303000 | -4.07151100 |
| H  | 11.06862600 | -2.73442300 | -1.76517600 |
| H  | 9.54768200  | -2.97562800 | 0.19012200  |
| H  | 7.17508400  | -3.49781800 | -0.13285900 |
| N  | 4.99495300  | -4.65436300 | -2.14653500 |
| C  | 3.75525400  | -4.81151100 | -2.86520600 |
| C  | 3.77414200  | -5.18754300 | -4.20979700 |
| C  | 2.54247400  | -4.57859500 | -2.21482100 |
| C  | 2.57510200  | -5.32336700 | -4.91095300 |

|   |             |             |             |
|---|-------------|-------------|-------------|
| H | 4.72475400  | -5.39111200 | -4.69608700 |
| C | 1.34854000  | -4.72664600 | -2.91663300 |
| H | 2.55548600  | -4.25571600 | -1.17999900 |
| C | 1.35990200  | -5.09541700 | -4.26406200 |
| H | 2.59228000  | -5.61985800 | -5.95603900 |
| H | 0.40565800  | -4.53754300 | -2.41169900 |
| H | 0.42557300  | -5.20340100 | -4.80769400 |
| H | 10.83603700 | -1.03111500 | 3.11632900  |
| H | 9.40451500  | 2.84317100  | -4.89824500 |
| H | 3.10939100  | 3.86687100  | 1.68794500  |
| I | 4.30467800  | -2.63574300 | 1.00246200  |
| C | 5.04732300  | 2.67372000  | -5.53262800 |
| H | 3.96506200  | 2.74820000  | -5.69359600 |
| H | 5.54655800  | 3.18313800  | -6.36467000 |
| H | 5.28762400  | 3.21972700  | -4.61328700 |
| C | 5.49199300  | 1.21362700  | -5.42497200 |
| H | 5.27632700  | 0.68892500  | -6.36655200 |
| H | 6.57830500  | 1.17221500  | -5.28447100 |
| C | 4.80713600  | 0.48051600  | -4.26947400 |
| H | 3.71981100  | 0.47752500  | -4.40825600 |
| H | 5.00227500  | 1.01782800  | -3.33356600 |
| C | 5.28831000  | -0.96986500 | -4.12620800 |
| H | 6.37169200  | -1.01405000 | -3.99110100 |
| H | 5.03431400  | -1.53788500 | -5.03284600 |
| O | 3.39887500  | -1.64546600 | -2.79985500 |
| C | 4.59084000  | -1.64399900 | -2.95323700 |

### IM13

|   |            |            |             |
|---|------------|------------|-------------|
| C | 5.09349000 | 3.93974600 | 2.31756100  |
| C | 4.15892200 | 3.01013000 | 1.86386300  |
| C | 4.57120300 | 1.91846000 | 1.09612600  |
| C | 5.92494900 | 1.75782200 | 0.77726100  |
| C | 6.86309400 | 2.69296100 | 1.24218900  |
| C | 6.44791500 | 3.77912300 | 2.00767600  |
| H | 3.10816200 | 3.12120400 | 2.11428000  |
| H | 3.84725100 | 1.17614500 | 0.77511000  |
| H | 7.91586700 | 2.56831200 | 1.00787900  |
| H | 7.17868000 | 4.49823100 | 2.36694300  |
| C | 8.22842200 | 2.25315600 | -4.08079400 |
| C | 7.35178600 | 2.98416900 | -3.27881700 |
| C | 6.83184300 | 2.42410500 | -2.11024700 |
| C | 7.18209900 | 1.12094300 | -1.73087100 |
| C | 8.05483000 | 0.38587200 | -2.55039000 |
| C | 8.57757600 | 0.95126500 | -3.71236100 |

|    |             |             |             |
|----|-------------|-------------|-------------|
| H  | 7.07034800  | 3.99522000  | -3.55866600 |
| H  | 6.16014000  | 3.00604700  | -1.48855200 |
| H  | 8.33900000  | -0.62442400 | -2.27749500 |
| H  | 9.26056400  | 0.37198300  | -4.32749000 |
| C  | 9.94836500  | -1.51767700 | 2.14072000  |
| C  | 8.64173700  | -1.98675700 | 2.29238100  |
| C  | 7.60438400  | -1.42389900 | 1.54907100  |
| C  | 7.86683900  | -0.37853900 | 0.65040600  |
| C  | 9.17980600  | 0.09091800  | 0.50472900  |
| C  | 10.21511400 | -0.47858800 | 1.24635700  |
| H  | 8.42794900  | -2.79409400 | 2.98632100  |
| H  | 6.58849600  | -1.79326200 | 1.66390200  |
| H  | 9.39696400  | 0.88700400  | -0.19972400 |
| H  | 11.23035300 | -0.11194100 | 1.12354100  |
| P  | 6.43511000  | 0.32918600  | -0.24973800 |
| Cu | 4.74479900  | -1.20807100 | -0.41959700 |
| B  | 5.30680200  | -5.39101200 | -1.56865600 |
| O  | 4.64661700  | -6.52429200 | -1.15320700 |
| C  | 4.70966200  | -6.53175600 | 0.29855600  |
| C  | 5.98545500  | -5.66006700 | 0.57712000  |
| O  | 5.98128100  | -4.74881700 | -0.55534900 |
| C  | 7.29428900  | -6.45214200 | 0.48941400  |
| H  | 8.12892500  | -5.74509100 | 0.45465000  |
| H  | 7.42775300  | -7.11091500 | 1.35364500  |
| H  | 7.32734100  | -7.05922300 | -0.42075900 |
| C  | 5.93655000  | -4.84308100 | 1.86050800  |
| H  | 5.83463800  | -5.50074100 | 2.73124800  |
| H  | 6.87079300  | -4.28317500 | 1.96752400  |
| H  | 5.10758500  | -4.13220600 | 1.85390800  |
| C  | 4.80961000  | -7.97814900 | 0.76751300  |
| H  | 4.94105600  | -8.02313900 | 1.85451800  |
| H  | 3.88713700  | -8.51003800 | 0.51475700  |
| H  | 5.64290000  | -8.49930500 | 0.29077700  |
| C  | 3.42015900  | -5.88482500 | 0.80847500  |
| H  | 2.56669000  | -6.42830900 | 0.39102300  |
| H  | 3.35430900  | -5.92430200 | 1.90038800  |
| H  | 3.34630000  | -4.83683700 | 0.50511700  |
| C  | 5.99951200  | -3.81927100 | -3.46246100 |
| H  | 6.00486500  | -3.91402000 | -4.55291000 |
| C  | 7.45859100  | -3.70044000 | -3.03128400 |
| C  | 8.44761000  | -4.24031600 | -3.86129900 |
| C  | 9.79277600  | -4.18353000 | -3.49763900 |
| C  | 10.16332600 | -3.58033400 | -2.29417800 |
| C  | 9.18490100  | -3.03396700 | -1.46188800 |

|   |             |             |             |
|---|-------------|-------------|-------------|
| C | 7.84101400  | -3.08693900 | -1.83314700 |
| H | 8.15831100  | -4.71788200 | -4.79426200 |
| H | 10.54799800 | -4.60993500 | -4.15180300 |
| H | 11.20975400 | -3.53758400 | -2.00515500 |
| H | 9.46125100  | -2.56670500 | -0.52306900 |
| H | 7.08998800  | -2.67866600 | -1.17033200 |
| N | 5.30016800  | -4.99039100 | -2.93985800 |
| C | 4.25380800  | -5.47057800 | -3.79165500 |
| C | 4.56827700  | -6.08340300 | -5.00978300 |
| C | 2.91213100  | -5.29918500 | -3.43191800 |
| C | 3.55277800  | -6.51414700 | -5.86292700 |
| H | 5.61232100  | -6.23299000 | -5.27202900 |
| C | 1.89923000  | -5.74595900 | -4.27995600 |
| H | 2.67624000  | -4.81569000 | -2.48968400 |
| C | 2.21481300  | -6.34877400 | -5.49923500 |
| H | 3.80714500  | -6.99219800 | -6.80494100 |
| H | 0.86075200  | -5.61280800 | -3.99012900 |
| H | 1.42367800  | -6.69006300 | -6.16068400 |
| H | 10.75618200 | -1.96159600 | 2.71537300  |
| H | 8.63558000  | 2.69270400  | -4.98671500 |
| H | 4.77205500  | 4.78560400  | 2.91878700  |
| I | 3.03820500  | -1.77915100 | 1.39968000  |
| C | 3.80661500  | 2.19880400  | -4.37243300 |
| H | 2.74044300  | 1.95847500  | -4.28289900 |
| H | 3.90905800  | 3.00525500  | -5.10719800 |
| H | 4.14403800  | 2.58383000  | -3.40309700 |
| C | 4.61961200  | 0.96730200  | -4.77576800 |
| H | 4.29479300  | 0.61495700  | -5.76509100 |
| H | 5.67652000  | 1.24314400  | -4.87325200 |
| C | 4.48813800  | -0.17006300 | -3.76051700 |
| H | 3.44049700  | -0.48511900 | -3.67772100 |
| H | 4.77360100  | 0.19725400  | -2.76894500 |
| C | 5.35045600  | -1.37898700 | -4.11355900 |
| H | 6.41157000  | -1.09975000 | -4.18525800 |
| H | 5.08754700  | -1.77271500 | -5.10673500 |
| O | 4.58406300  | -2.45271200 | -2.10672200 |
| C | 5.24457900  | -2.52335300 | -3.13718400 |

**Cat2**

|    |             |             |             |
|----|-------------|-------------|-------------|
| Cu | 0.48007300  | 0.34947300  | -0.55147600 |
| C  | 0.37566000  | -1.61277500 | -0.41741200 |
| N  | -0.80762400 | -2.20909000 | -0.10553100 |
| C  | -0.64272700 | -3.54203300 | 0.28813100  |
| C  | 0.69632600  | -3.79340700 | 0.21164100  |

|   |             |             |             |
|---|-------------|-------------|-------------|
| N | 1.28892100  | -2.60036300 | -0.22713200 |
| B | 0.08415500  | 2.26415100  | -0.15120600 |
| O | -0.03124900 | 3.37511400  | -0.98116000 |
| C | -0.38398700 | 4.53284800  | -0.18628800 |
| C | -1.03068000 | 3.88318300  | 1.07999700  |
| O | -0.35679000 | 2.60335800  | 1.13994800  |
| H | 1.96660400  | -4.24946200 | -2.46746800 |
| C | -4.45948500 | -0.09268800 | -0.27752300 |
| C | -4.04326200 | -0.89230900 | -1.34621400 |
| H | -4.65821100 | -0.95197600 | -2.24077900 |
| C | -2.84276600 | -1.60448300 | -1.30179600 |
| C | -1.55150900 | -0.52468700 | 2.15438100  |
| H | -0.93849000 | 0.37599400  | 2.01961200  |
| C | -2.37186400 | -2.41649100 | -2.48211400 |
| H | -2.22476100 | -3.47249900 | -2.22601500 |
| H | 5.38810000  | -1.24827800 | 1.30346800  |
| C | 5.44410400  | -2.03642600 | -0.69771600 |
| C | 4.67647800  | -2.58042800 | -1.73300000 |
| H | 5.15960500  | -2.85723400 | -2.66710300 |
| H | -3.95231100 | 0.60916900  | 1.69079100  |
| C | 3.29860200  | -2.76763100 | -1.60325900 |
| C | 2.74074200  | -1.41867000 | 1.93987100  |
| C | -2.43601300 | -0.70899200 | 0.94828200  |
| H | 2.09909100  | -2.21072300 | 2.34288600  |
| C | 2.69973800  | -2.40408400 | -0.39036900 |
| C | 3.42866600  | -1.84777400 | 0.66876500  |
| C | 4.80452400  | -1.67728500 | 0.49251500  |
| H | -3.09420100 | -2.36505500 | -3.30135300 |
| H | -1.40885600 | -2.04228300 | -2.84898600 |
| H | -0.88062900 | -1.37347700 | 2.31193600  |
| H | -2.15577700 | -0.38703100 | 3.05723500  |
| H | 3.09074500  | -3.50502400 | -3.61695000 |
| H | 1.68348800  | -2.60254300 | -3.02022100 |
| H | 3.47253100  | -1.14547800 | 2.70513600  |
| H | 2.09639500  | -0.54989600 | 1.75538800  |
| C | -3.64741600 | -0.01881900 | 0.85721000  |
| C | 2.46895500  | -3.31310100 | -2.73822500 |
| C | -2.05922700 | -1.50422200 | -0.14405800 |
| C | 6.92577900  | -1.80994200 | -0.87586300 |
| H | 7.45379900  | -1.84388800 | 0.08258200  |
| H | 7.36924400  | -2.56159200 | -1.53725600 |
| H | 7.12120700  | -0.82626800 | -1.32217800 |
| C | -5.74787900 | 0.69069800  | -0.34391300 |
| H | -6.43605300 | 0.39604800  | 0.45784100  |



|   |             |             |             |
|---|-------------|-------------|-------------|
| H | -5.55931900 | 1.76483800  | -0.22853700 |
| H | -6.26013700 | 0.53996700  | -1.29899600 |
| C | -2.52765300 | 3.58787700  | 0.90939100  |
| H | -2.85828500 | 2.95867200  | 1.74182800  |
| H | -3.12884500 | 4.50397000  | 0.90682600  |
| H | -2.71107500 | 3.03860600  | -0.01872900 |
| C | -0.79394200 | 4.63235500  | 2.38781500  |
| H | -1.23349400 | 5.63648500  | 2.35040400  |
| H | -1.26245700 | 4.08765400  | 3.21451300  |
| H | 0.27174800  | 4.72576800  | 2.60739900  |
| C | -1.31567900 | 5.42244000  | -1.00425600 |
| H | -1.66272500 | 6.27823800  | -0.41234100 |
| H | -0.78152900 | 5.80811200  | -1.87869300 |
| H | -2.18580300 | 4.86637200  | -1.36023500 |
| C | 0.91943600  | 5.28017600  | 0.12207200  |
| H | 1.41944800  | 5.51948700  | -0.82144600 |
| H | 0.73767200  | 6.21421000  | 0.66574500  |
| H | 1.59409500  | 4.65382200  | 0.71311100  |
| C | -1.79066500 | -4.39166400 | 0.71346100  |
| H | -2.32410300 | -3.94097700 | 1.55829900  |
| H | -2.51998600 | -4.52280600 | -0.09454100 |
| H | -1.44105300 | -5.38144400 | 1.01850000  |
| C | 1.49782200  | -5.01056000 | 0.52307500  |
| H | 2.03464400  | -5.38096400 | -0.35830000 |
| H | 2.24969700  | -4.80595900 | 1.29420600  |
| H | 0.84790400  | -5.81160900 | 0.88482700  |

#### IM14

|    |             |             |             |
|----|-------------|-------------|-------------|
| Cu | -0.27139300 | 0.35110800  | 0.60420900  |
| C  | -0.07229100 | -1.52450300 | 1.19268600  |
| N  | -0.87030100 | -2.59224300 | 1.44697500  |
| C  | -0.18841000 | -3.61423600 | 2.12668000  |
| C  | 1.08893100  | -3.16765800 | 2.29544600  |
| N  | 1.13115200  | -1.89685300 | 1.71281100  |
| B  | 0.27171000  | 2.27782600  | 0.55850000  |
| O  | 0.42346300  | 3.09189800  | -0.57639100 |
| C  | 1.34648600  | 4.16442900  | -0.26340600 |
| C  | 1.18869800  | 4.28731100  | 1.28668200  |
| O  | 0.80958600  | 2.94081800  | 1.66223200  |
| C  | -1.14487900 | 0.66370300  | -1.99745600 |
| H  | -0.55319500 | 1.57903400  | -2.08365600 |
| C  | -2.52614200 | 0.85326300  | -1.53805300 |
| C  | -3.46063400 | -0.19254800 | -1.53730700 |
| C  | -4.76384900 | 0.03610300  | -1.10680800 |

|   |             |             |             |
|---|-------------|-------------|-------------|
| C | -5.14763800 | 1.30588700  | -0.66610000 |
| C | -4.22133900 | 2.35251300  | -0.66314100 |
| C | -2.91885200 | 2.12912300  | -1.09981100 |
| H | -3.14910300 | -1.17247400 | -1.87683400 |
| H | -5.48237700 | -0.77654500 | -1.11406800 |
| H | -6.16623300 | 1.47976600  | -0.32922100 |
| H | -4.51552400 | 3.34014800  | -0.31869400 |
| H | -2.18011100 | 2.92469800  | -1.08028000 |
| H | 2.89054200  | -3.41086000 | 0.07579700  |
| C | -4.94986300 | -3.01028400 | 0.47048100  |
| C | -3.95933600 | -3.48576500 | -0.39263800 |
| H | -4.24870500 | -3.98350700 | -1.31525400 |
| C | -2.59889900 | -3.32234600 | -0.11243200 |
| C | -2.79613500 | -1.42035900 | 3.20529100  |
| H | -2.12975100 | -2.02399500 | 3.83295500  |
| C | -1.53875500 | -3.74855400 | -1.09485400 |
| H | -0.71099800 | -4.27609300 | -0.60936900 |
| H | 3.73687000  | 1.64393500  | 3.02269500  |
| C | 4.50407800  | 0.60701000  | 1.30178600  |
| C | 4.29822600  | -0.46924200 | 0.43019300  |
| H | 4.99813100  | -0.64210300 | -0.38338900 |
| H | -5.32103800 | -1.93288600 | 2.29713800  |
| C | 3.19817800  | -1.31698800 | 0.56101000  |
| C | 1.48071700  | 0.27201300  | 3.60679400  |
| C | -3.21527400 | -2.16310100 | 1.96212000  |
| H | 1.00553300  | -0.63942400 | 3.98175800  |
| C | 2.30028900  | -1.06720800 | 1.61048000  |
| C | 2.47864400  | -0.01565300 | 2.51715600  |
| C | 3.59204800  | 0.81197200  | 2.33880800  |
| H | -1.96106700 | -4.40199100 | -1.86417400 |
| H | -1.12023200 | -2.86081200 | -1.58673200 |
| H | -3.66743700 | -1.13721300 | 3.80227900  |
| H | -2.24545400 | -0.50890000 | 2.94385700  |
| H | 3.74226700  | -2.47501500 | -1.16774600 |
| H | 2.00390500  | -2.27985200 | -0.94784600 |
| H | 1.96080500  | 0.78816300  | 4.44389100  |
| H | 0.69598700  | 0.92888400  | 3.21355800  |
| C | -4.56049500 | -2.33561900 | 1.63252400  |
| C | 2.94963100  | -2.43430300 | -0.41860000 |
| C | -2.25445400 | -2.68296700 | 1.08439800  |
| C | -6.41239100 | -3.22089000 | 0.16122900  |
| H | -6.81056300 | -4.09044100 | 0.70044400  |
| H | -7.01157100 | -2.35361300 | 0.45927100  |
| H | -6.57445800 | -3.39612800 | -0.90719200 |

|             |             |             |             |
|-------------|-------------|-------------|-------------|
| C           | 5.67039300  | 1.54433400  | 1.10049100  |
| H           | 6.57222000  | 1.00400800  | 0.79243200  |
| H           | 5.44965100  | 2.28173600  | 0.31762100  |
| H           | 5.90046500  | 2.09840100  | 2.01604800  |
| C           | 2.46408100  | 4.66026200  | 2.03685900  |
| H           | 2.83470900  | 5.64288200  | 1.72121000  |
| H           | 2.25896000  | 4.70423700  | 3.11166700  |
| H           | 3.25025800  | 3.91987000  | 1.87348800  |
| C           | 0.03820800  | 5.21004400  | 1.70391100  |
| H           | -0.87801800 | 4.95407700  | 1.16344300  |
| H           | -0.15141500 | 5.07546100  | 2.77324200  |
| H           | 0.27154300  | 6.26513400  | 1.52286300  |
| C           | 0.95379800  | 5.40401200  | -1.05945600 |
| H           | 1.59334700  | 6.25595400  | -0.79948400 |
| H           | 1.07038000  | 5.20589600  | -2.12997600 |
| H           | -0.08695100 | 5.68187700  | -0.87869000 |
| C           | 2.73968600  | 3.68013000  | -0.68947000 |
| H           | 2.71155700  | 3.41674700  | -1.75169200 |
| H           | 3.50342700  | 4.45222500  | -0.54466900 |
| H           | 3.02630000  | 2.78725700  | -0.12589100 |
| N           | -0.67790300 | -0.48875400 | -2.34181500 |
| C           | 0.66483000  | -0.58219800 | -2.74852600 |
| C           | 1.67863700  | 0.29447400  | -2.31404900 |
| C           | 1.00603600  | -1.64236700 | -3.60542300 |
| C           | 2.98582000  | 0.12700700  | -2.76411800 |
| H           | 1.44318300  | 1.08392700  | -1.61071700 |
| C           | 2.31449000  | -1.79730400 | -4.05700000 |
| H           | 0.21992800  | -2.32241400 | -3.91966600 |
| C           | 3.31133700  | -0.90961300 | -3.64230300 |
| H           | 3.75673100  | 0.80765400  | -2.41343000 |
| H           | 2.55837000  | -2.61396000 | -4.73130600 |
| H           | 4.33315500  | -1.03274600 | -3.99080500 |
| C           | 2.26993200  | -3.77189300 | 2.97447700  |
| H           | 3.11172200  | -3.90525200 | 2.28557400  |
| H           | 2.62278400  | -3.13533700 | 3.79436400  |
| H           | 2.01196500  | -4.74991600 | 3.38915500  |
| C           | -0.85974500 | -4.88095200 | 2.53347200  |
| H           | -1.71394000 | -4.68856400 | 3.19342500  |
| H           | -1.24208300 | -5.43108800 | 1.66573800  |
| H           | -0.15757900 | -5.52914200 | 3.06437400  |
| <b>TS10</b> |             |             |             |
| Cu          | 0.01200500  | -0.35110600 | -0.36764400 |
| C           | 0.43985700  | -1.59039300 | 0.99355000  |

|   |             |             |             |
|---|-------------|-------------|-------------|
| N | -0.45183900 | -2.40271600 | 1.61378000  |
| C | 0.17247700  | -3.25117200 | 2.53846600  |
| C | 1.50237900  | -2.94688700 | 2.49133200  |
| N | 1.63382100  | -1.92561300 | 1.54040100  |
| B | -0.07585100 | 1.77861100  | -0.16573200 |
| O | 0.67042200  | 2.87314400  | -0.53313100 |
| C | 0.71363200  | 3.80405500  | 0.58353100  |
| C | -0.52283700 | 3.36072100  | 1.45212800  |
| O | -0.69816400 | 1.96553500  | 1.05467500  |
| C | -0.73597700 | 0.95367300  | -1.86136000 |
| H | -0.14637400 | 1.68660100  | -2.42197200 |
| C | -2.15381100 | 1.41763500  | -1.68879400 |
| C | -3.10300400 | 0.63038700  | -1.02263800 |
| C | -4.40204200 | 1.09595000  | -0.84354500 |
| C | -4.77939900 | 2.35038500  | -1.33478800 |
| C | -3.84479200 | 3.13356700  | -2.01127800 |
| C | -2.53826200 | 2.66920700  | -2.18171600 |
| H | -2.81287200 | -0.34410200 | -0.64702000 |
| H | -5.12231400 | 0.48043900  | -0.31289300 |
| H | -5.79498900 | 2.71033300  | -1.19340700 |
| H | -4.12890500 | 4.10566600  | -2.40582600 |
| H | -1.80427300 | 3.28264900  | -2.69889700 |
| H | 2.83646900  | -3.66301500 | -0.15878900 |
| C | -4.56501200 | -2.28965000 | 0.68815000  |
| C | -3.68541800 | -3.08054800 | -0.06102200 |
| H | -4.06789900 | -3.65686900 | -0.89985300 |
| C | -2.32120800 | -3.13438300 | 0.22687400  |
| C | -2.12659500 | -0.62094700 | 3.11530900  |
| H | -1.38758200 | -1.12332700 | 3.74836800  |
| C | -1.36632900 | -3.91886800 | -0.63504900 |
| H | -0.66422100 | -4.51067200 | -0.03746400 |
| H | 4.66150600  | 1.43951400  | 2.18598700  |
| C | 5.09674900  | 0.21778100  | 0.46623700  |
| C | 4.68764500  | -0.88981800 | -0.28181000 |
| H | 5.24669000  | -1.17451300 | -1.16916000 |
| H | -4.71840700 | -0.88412100 | 2.30892900  |
| C | 3.55599400  | -1.63390400 | 0.06304900  |
| C | 2.36839200  | 0.29355500  | 3.15152200  |
| C | -2.68949600 | -1.53789800 | 2.05906200  |
| H | 2.27179600  | -0.50339200 | 3.89811500  |
| C | 2.84088700  | -1.23304700 | 1.19690300  |
| C | 3.21324200  | -0.13004400 | 1.97601400  |
| C | 4.35477200  | 0.57852400  | 1.59700300  |
| H | -1.90953900 | -4.59445300 | -1.30164100 |

|   |             |             |             |
|---|-------------|-------------|-------------|
| H | -0.77438700 | -3.23291500 | -1.25300400 |
| H | -2.92336500 | -0.23164500 | 3.75598900  |
| H | -1.62442200 | 0.22987600  | 2.63726900  |
| H | 3.85502200  | -3.08383700 | -1.49795700 |
| H | 2.19523600  | -2.52078800 | -1.34655100 |
| H | 2.79962100  | 1.16835000  | 3.64659500  |
| H | 1.35306100  | 0.54569200  | 2.82276100  |
| C | -4.05101300 | -1.52495700 | 1.73825500  |
| C | 3.08944700  | -2.79316400 | -0.77594000 |
| C | -1.85323100 | -2.37232200 | 1.30836700  |
| C | -6.03130400 | -2.23907000 | 0.33384900  |
| H | -6.46524900 | -3.24441800 | 0.28152100  |
| H | -6.60078700 | -1.66252300 | 1.06933000  |
| H | -6.17997700 | -1.77139300 | -0.64722200 |
| C | 6.29224400  | 1.03344200  | 0.03772200  |
| H | 7.06563200  | 0.40409700  | -0.41494800 |
| H | 6.00418200  | 1.78314000  | -0.71074700 |
| H | 6.73763000  | 1.56817500  | 0.88285200  |
| C | -0.29555200 | 3.40146000  | 2.95910000  |
| H | -0.11179900 | 4.42812900  | 3.29608800  |
| H | -1.18866900 | 3.03168400  | 3.47286800  |
| H | 0.55045500  | 2.77988700  | 3.25846400  |
| C | -1.82349400 | 4.08337000  | 1.09640800  |
| H | -2.02507500 | 4.04116800  | 0.02437700  |
| H | -2.65322300 | 3.58291300  | 1.60419900  |
| H | -1.80004800 | 5.13112200  | 1.41498900  |
| C | 0.62549200  | 5.22023300  | 0.02547800  |
| H | 0.60001800  | 5.95725900  | 0.83623600  |
| H | 1.50422100  | 5.42492700  | -0.59393400 |
| H | -0.26421000 | 5.35040500  | -0.59387600 |
| C | 2.06218300  | 3.58720200  | 1.27444700  |
| H | 2.86278400  | 3.75939500  | 0.54893300  |
| H | 2.20190000  | 4.27301300  | 2.11672900  |
| H | 2.15559500  | 2.56013500  | 1.63157400  |
| N | -0.62537500 | -0.37856600 | -2.33637300 |
| C | 0.59889800  | -0.71468700 | -2.90331800 |
| C | 1.79001200  | 0.05977900  | -2.82985800 |
| C | 0.68252600  | -1.95351400 | -3.59472200 |
| C | 2.97429000  | -0.38735900 | -3.42129000 |
| H | 1.79466900  | 1.00751600  | -2.30111300 |
| C | 1.86447700  | -2.37999800 | -4.18087400 |
| H | -0.22394400 | -2.54855800 | -3.66549600 |
| C | 3.03020700  | -1.60135600 | -4.10272100 |
| H | 3.86606000  | 0.23071100  | -3.33944900 |

|   |             |             |             |
|---|-------------|-------------|-------------|
| H | 1.88322500  | -3.32962300 | -4.71147700 |
| H | 3.95301000  | -1.93708300 | -4.56724700 |
| C | 2.67903200  | -3.50682700 | 3.21338600  |
| H | 3.41219100  | -3.92581600 | 2.51404300  |
| H | 3.19633700  | -2.73906600 | 3.80078300  |
| H | 2.36566100  | -4.30202200 | 3.89481800  |
| C | -0.59489900 | -4.24803000 | 3.33666800  |
| H | -1.34827900 | -3.76201000 | 3.96784300  |
| H | -1.12469400 | -4.95612500 | 2.68865200  |
| H | 0.07735500  | -4.81634300 | 3.98461600  |

**IM15**

|    |             |             |             |
|----|-------------|-------------|-------------|
| Cu | 0.35567800  | -0.13042200 | 0.67884600  |
| C  | 1.76435400  | 1.13438600  | 0.75260500  |
| N  | 1.82522800  | 2.29354900  | 1.45544200  |
| C  | 3.05490700  | 2.94350500  | 1.28500100  |
| C  | 3.78910000  | 2.15453400  | 0.44693500  |
| N  | 2.97368300  | 1.05990800  | 0.13398400  |
| B  | -2.34897700 | -0.47739700 | -0.76644200 |
| O  | -1.97507300 | 0.83406000  | -1.01170800 |
| C  | -2.05215600 | 1.04137500  | -2.44775200 |
| C  | -1.94374700 | -0.42292700 | -2.99633000 |
| O  | -2.55161200 | -1.18934300 | -1.92643400 |
| C  | -2.36418700 | -1.12971400 | 0.66054100  |
| H  | -2.97921300 | -2.04011900 | 0.60818100  |
| C  | -2.86165600 | -0.28086900 | 1.81589800  |
| C  | -4.01161500 | 0.50693100  | 1.67839100  |
| C  | -4.50621100 | 1.24817700  | 2.75129800  |
| C  | -3.85316800 | 1.21418200  | 3.98507900  |
| C  | -2.69462200 | 0.44853400  | 4.12704700  |
| C  | -2.20168800 | -0.28849500 | 3.05019000  |
| H  | -4.52484500 | 0.53673100  | 0.71927500  |
| H  | -5.40316600 | 1.84994300  | 2.62567600  |
| H  | -4.24144200 | 1.78302800  | 4.82520600  |
| H  | -2.17202600 | 0.42454600  | 5.07972200  |
| H  | -1.30066500 | -0.88510500 | 3.15120600  |
| H  | 4.12951000  | -0.42991200 | 1.93172200  |
| C  | -1.14683400 | 3.52611100  | 4.18833300  |
| C  | -0.02251400 | 2.81373400  | 4.62037900  |
| H  | 0.08198600  | 2.56898400  | 5.67473900  |
| C  | 0.95894500  | 2.38571300  | 3.72755200  |
| C  | -0.53345700 | 3.63258000  | 0.42094400  |
| H  | -0.97976200 | 2.74391800  | -0.03961900 |
| C  | 2.12594000  | 1.54894600  | 4.18899200  |

|   |             |             |             |
|---|-------------|-------------|-------------|
| H | 2.08098700  | 1.38428100  | 5.26890100  |
| H | 3.45542800  | -1.04983700 | -3.91195100 |
| C | 3.91271200  | -2.31048600 | -2.23101500 |
| C | 4.01807800  | -2.35974800 | -0.83694400 |
| H | 4.30966900  | -3.29054900 | -0.35651500 |
| H | -2.17333700 | 4.31070100  | 2.47206700  |
| C | 3.73193400  | -1.25225000 | -0.03684600 |
| C | 2.85994100  | 1.32488900  | -2.74644200 |
| C | -0.32392800 | 3.39341400  | 1.89289600  |
| H | 2.35840900  | 1.12810400  | -3.69824900 |
| C | 3.34238700  | -0.06495400 | -0.67737300 |
| C | 3.25081200  | 0.03446700  | -2.07162300 |
| C | 3.53823700  | -1.10500600 | -2.82919100 |
| H | 2.11699100  | 0.57059600  | 3.69349400  |
| H | 3.09147000  | 2.01342200  | 3.95652600  |
| H | 0.40685200  | 3.83892900  | -0.10042600 |
| H | -1.21295100 | 4.47514700  | 0.25859900  |
| H | 4.44820600  | -2.17114700 | 1.77207000  |
| H | 2.78621600  | -1.57866400 | 1.86470600  |
| H | 2.19001900  | 1.92029100  | -2.12176400 |
| H | 3.74074600  | 1.94393000  | -2.96312200 |
| C | -1.28606900 | 3.79246400  | 2.82591200  |
| C | 3.78402100  | -1.35789300 | 1.46598100  |
| C | 0.79980100  | 2.71141200  | 2.37132800  |
| C | -2.17984300 | 4.00233500  | 5.17816700  |
| H | -3.14632600 | 4.16525600  | 4.69321600  |
| H | -2.32388600 | 3.27405000  | 5.98294000  |
| H | -1.87423200 | 4.94898600  | 5.64327900  |
| C | 4.16705900  | -3.54468700 | -3.06060200 |
| H | 4.32764400  | -3.29448000 | -4.11377400 |
| H | 5.04447300  | -4.09370100 | -2.70162200 |
| H | 3.31172200  | -4.23007400 | -3.00808100 |
| C | -2.70958100 | -0.68460500 | -4.28721300 |
| H | -2.32609600 | -0.05729700 | -5.10026700 |
| H | -2.58853300 | -1.73229000 | -4.57917000 |
| H | -3.77738200 | -0.48890000 | -4.16685500 |
| C | -0.49287700 | -0.90649500 | -3.12355000 |
| H | 0.02671800  | -0.41103100 | -3.95085300 |
| H | 0.06640900  | -0.73402100 | -2.19916800 |
| H | -0.49608000 | -1.98426000 | -3.30980000 |
| C | -0.92029200 | 1.96609100  | -2.87669000 |
| H | 0.03555000  | 1.61332000  | -2.48870000 |
| H | -0.85917200 | 2.02239800  | -3.96953900 |
| H | -1.09246300 | 2.97720300  | -2.49495100 |

|   |             |             |             |
|---|-------------|-------------|-------------|
| C | -3.41117800 | 1.69102400  | -2.72440200 |
| H | -3.49677300 | 2.59963800  | -2.12072100 |
| H | -3.52382500 | 1.96253900  | -3.77927100 |
| H | -4.22884100 | 1.01893000  | -2.44728400 |
| N | -0.94318100 | -1.49004400 | 0.71831300  |
| C | -0.57949500 | -2.77979200 | 1.04177900  |
| C | -1.39746800 | -3.68558900 | 1.76191800  |
| C | 0.70876700  | -3.24486300 | 0.66722200  |
| C | -0.93735700 | -4.95691300 | 2.09988600  |
| H | -2.38288500 | -3.37237900 | 2.09263100  |
| C | 1.15922900  | -4.51018500 | 1.01957800  |
| H | 1.33291600  | -2.58979500 | 0.06555600  |
| C | 0.34269700  | -5.38730000 | 1.74305500  |
| H | -1.59083600 | -5.61845000 | 2.66515400  |
| H | 2.15415900  | -4.82393200 | 0.70735100  |
| H | 0.69166300  | -6.37976800 | 2.01304600  |
| C | 5.17270300  | 2.29440800  | -0.08803900 |
| H | 5.77030300  | 1.40114300  | 0.12644700  |
| H | 5.17873400  | 2.43558300  | -1.17511400 |
| H | 5.67084100  | 3.15481500  | 0.36615700  |
| C | 3.35402200  | 4.25298200  | 1.93009800  |
| H | 4.36266800  | 4.58399600  | 1.66975700  |
| H | 2.64677900  | 5.02510900  | 1.60510200  |
| H | 3.28388900  | 4.19215100  | 3.02189600  |

**TS11<sup>OSS</sup>**

|    |             |             |             |
|----|-------------|-------------|-------------|
| Cu | 0.46131700  | 0.45878700  | 0.27585100  |
| C  | 1.83376600  | 1.72024100  | -0.27656000 |
| N  | 1.57702000  | 2.81956400  | -1.03091600 |
| C  | 2.73453200  | 3.57179100  | -1.27690700 |
| C  | 3.74933900  | 2.91366100  | -0.64859700 |
| N  | 3.16844400  | 1.78749100  | -0.04592600 |
| B  | -1.21938300 | -3.14992000 | -1.21402000 |
| O  | -2.02819200 | -3.29452700 | -0.12214700 |
| C  | -2.90767700 | -4.42276500 | -0.38896100 |
| C  | -2.08996300 | -5.22532700 | -1.46496900 |
| O  | -1.32652300 | -4.16891100 | -2.12286400 |
| C  | -0.16708400 | -1.97071700 | -1.34408600 |
| H  | 0.12959600  | -1.87515500 | -2.40224200 |
| C  | 1.02715300  | -2.49162100 | -0.56350300 |
| C  | 1.08614000  | -2.36637500 | 0.83272800  |
| C  | 2.13930400  | -2.93328500 | 1.55056600  |
| C  | 3.12797300  | -3.66329200 | 0.89060200  |
| C  | 3.06912100  | -3.80652000 | -0.49695400 |



|   |             |             |             |
|---|-------------|-------------|-------------|
| C | 2.02890300  | -3.22024400 | -1.21766900 |
| H | 0.30099400  | -1.83601700 | 1.36063400  |
| H | 2.17831900  | -2.80452300 | 2.62818700  |
| H | 3.94238400  | -4.11294700 | 1.45146200  |
| H | 3.83690900  | -4.37015300 | -1.02071900 |
| H | 1.98309200  | -3.33571100 | -2.29793300 |
| H | 2.34958800  | 1.95712000  | 2.83293200  |
| C | -2.20381900 | 3.90487300  | -2.55212500 |
| C | -1.75354700 | 4.41580800  | -1.33277100 |
| H | -2.38197800 | 5.10945500  | -0.77953800 |
| C | -0.51591100 | 4.05073400  | -0.79307900 |
| C | 0.67835200  | 1.55626600  | -3.44339900 |
| H | 1.71239500  | 1.89076900  | -3.58542700 |
| C | -0.06222200 | 4.56022000  | 0.55107400  |
| H | -0.04281000 | 3.74283200  | 1.28306900  |
| H | 5.66943400  | -2.03735500 | 0.10425700  |
| C | 5.40780400  | -1.11722100 | 2.03115700  |
| C | 4.82414900  | -0.04780900 | 2.71656200  |
| H | 4.95725900  | 0.03419100  | 3.79267300  |
| H | -1.76007000 | 2.54157700  | -4.15742500 |
| C | 4.07122300  | 0.92699900  | 2.05596100  |
| C | 4.23697300  | -0.39570200 | -1.53689700 |
| C | -0.15749800 | 2.59179500  | -2.73581900 |
| H | 4.76481300  | -1.26451500 | -1.93813800 |
| C | 3.91022800  | 0.79121500  | 0.67156800  |
| C | 4.47086400  | -0.26797100 | -0.05309100 |
| C | 5.22953300  | -1.20616800 | 0.64794700  |
| H | 0.94912600  | 4.98065000  | 0.51198800  |
| H | -0.74070300 | 5.33326500  | 0.92248800  |
| H | 0.25325000  | 1.31710000  | -4.42187400 |
| H | 0.71663100  | 0.63506000  | -2.85052200 |
| H | 3.65166200  | 3.03583900  | 2.32380700  |
| H | 3.80504600  | 2.11229800  | 3.83215700  |
| H | 3.16989100  | -0.52272900 | -1.74770000 |
| H | 4.57200100  | 0.49442300  | -2.08284400 |
| C | -1.39989900 | 2.98373100  | -3.23220100 |
| C | 3.43953600  | 2.07255500  | 2.80222400  |
| C | 0.27371800  | 3.15808500  | -1.52682000 |
| C | -3.53741800 | 4.31555500  | -3.12422200 |
| H | -3.41281500 | 4.90518500  | -4.04127200 |
| H | -4.13573300 | 3.43444100  | -3.37944600 |
| H | -4.10816200 | 4.92087800  | -2.41327400 |
| C | 6.17881200  | -2.17902600 | 2.77569700  |
| H | 5.50407900  | -2.96121800 | 3.14864800  |

|   |             |             |             |
|---|-------------|-------------|-------------|
| H | 6.91734400  | -2.66561400 | 2.13025200  |
| H | 6.70277100  | -1.76339700 | 3.64279900  |
| C | -1.05883000 | -6.17705300 | -0.85151400 |
| H | -0.45007200 | -5.66485500 | -0.10007100 |
| H | -1.53667800 | -7.04461200 | -0.38537800 |
| H | -0.39090300 | -6.53141000 | -1.64222300 |
| C | -2.93181900 | -5.94152500 | -2.51210400 |
| H | -2.27779400 | -6.44981800 | -3.22748100 |
| H | -3.57303100 | -6.69475800 | -2.04090800 |
| H | -3.56216100 | -5.24116100 | -3.06376800 |
| C | -4.21697200 | -3.84383100 | -0.93253200 |
| H | -4.95617300 | -4.63031800 | -1.11581700 |
| H | -4.62716100 | -3.14437700 | -0.19964100 |
| H | -4.05052600 | -3.29029600 | -1.86094400 |
| C | -3.15049400 | -5.15863700 | 0.92255400  |
| H | -3.76390800 | -6.05175300 | 0.75858300  |
| H | -2.21201500 | -5.45704700 | 1.39409800  |
| H | -3.68087600 | -4.49975900 | 1.61634800  |
| N | -0.67259000 | -0.71121500 | -0.82069500 |
| C | -1.84205000 | -0.23982200 | -1.34477200 |
| C | -2.47826100 | 0.85538600  | -0.69671500 |
| C | -2.48487200 | -0.78183200 | -2.49435000 |
| C | -3.68315200 | 1.35944100  | -1.15805700 |
| H | -2.01171800 | 1.26868400  | 0.19122100  |
| C | -3.69401600 | -0.26367000 | -2.94335200 |
| H | -2.02833500 | -1.59888200 | -3.04182900 |
| C | -4.31017100 | 0.80312900  | -2.28016800 |
| H | -4.14235600 | 2.19282200  | -0.63512500 |
| H | -4.16316000 | -0.69747600 | -3.82303100 |
| H | -5.26182500 | 1.19233300  | -2.63000200 |
| C | 5.20518000  | 3.20833900  | -0.53209800 |
| H | 5.50353200  | 3.33946800  | 0.51462600  |
| H | 5.81493500  | 2.39420200  | -0.94069300 |
| H | 5.45207400  | 4.12507700  | -1.07393700 |
| C | 2.71045800  | 4.81810600  | -2.09319800 |
| H | 2.33651400  | 4.62449000  | -3.10552300 |
| H | 2.05812100  | 5.57902700  | -1.64933100 |
| H | 3.71639800  | 5.23787300  | -2.17573500 |
| I | -0.46005300 | 0.84688500  | 2.76505200  |
| C | -5.73809600 | 0.33043000  | 1.67867900  |
| H | -6.21704900 | 1.25349600  | 2.02580900  |
| H | -6.45031100 | -0.49149700 | 1.82793600  |
| H | -5.56397400 | 0.42427200  | 0.60092700  |
| C | -4.42714800 | 0.06413700  | 2.42174300  |

|   |             |             |            |
|---|-------------|-------------|------------|
| H | -3.75175800 | 0.92296900  | 2.33175400 |
| H | -4.62753100 | -0.05744900 | 3.49531100 |
| C | -3.70114800 | -1.18032800 | 1.89432100 |
| H | -3.38331300 | -1.01627000 | 0.85679900 |
| H | -4.43738100 | -2.00970800 | 1.83510900 |
| C | -2.54660800 | -1.62332600 | 2.71139800 |
| H | -2.54247600 | -1.48522700 | 3.78697500 |
| H | -1.79973800 | -2.27587800 | 2.27754900 |

**IM16**

|    |             |             |             |
|----|-------------|-------------|-------------|
| Cu | -0.01729900 | -0.32383500 | -0.56542500 |
| C  | 0.92400800  | -2.00129300 | -0.19398600 |
| N  | 2.23500700  | -2.34387800 | -0.16444500 |
| C  | 2.41272100  | -3.71170300 | 0.09364400  |
| C  | 1.16241300  | -4.23784800 | 0.22557000  |
| N  | 0.27403500  | -3.16898600 | 0.04304900  |
| B  | -1.42402000 | 2.87693200  | 1.84296200  |
| O  | -1.68831000 | 3.45433200  | 3.05563400  |
| C  | -2.17361900 | 4.80249000  | 2.77249400  |
| C  | -2.70160400 | 4.66640400  | 1.29674500  |
| O  | -1.87082300 | 3.59250700  | 0.77202100  |
| C  | -0.60056400 | 1.52945100  | 1.68383100  |
| H  | -0.58114000 | 1.01466100  | 2.65817900  |
| C  | 0.81190800  | 1.97280000  | 1.35069400  |
| C  | 1.18122500  | 2.27266100  | 0.03123500  |
| C  | 2.46495600  | 2.73972400  | -0.25308500 |
| C  | 3.37753300  | 2.95980900  | 0.77837700  |
| C  | 3.00789700  | 2.69104800  | 2.09768400  |
| C  | 1.73605600  | 2.19350600  | 2.37976200  |
| H  | 0.46058200  | 2.15863500  | -0.77248400 |
| H  | 2.74158300  | 2.93682700  | -1.28437400 |
| H  | 4.37283300  | 3.33439800  | 0.55729300  |
| H  | 3.71319700  | 2.85853600  | 2.90751200  |
| H  | 1.45065400  | 1.97958700  | 3.40715100  |
| H  | -1.61001500 | -2.38431200 | 3.40883800  |
| C  | 5.46644800  | 0.33817200  | -0.52811400 |
| C  | 4.89480800  | 0.07122000  | 0.71917900  |
| H  | 5.28882500  | 0.56238200  | 1.60446800  |
| C  | 3.80875700  | -0.79415000 | 0.85453600  |
| C  | 3.31756800  | -1.87537900 | -2.79155700 |
| H  | 3.19772800  | -2.95346900 | -2.63393500 |
| C  | 3.16763500  | -1.04898400 | 2.19480900  |
| H  | 3.14115100  | -2.11792400 | 2.43842400  |
| H  | -3.83502300 | -4.12349600 | -1.74739700 |

|   |             |             |             |
|---|-------------|-------------|-------------|
| C | -3.91485100 | -3.56609900 | 0.32942400  |
| C | -3.16267800 | -3.14117800 | 1.42757500  |
| H | -3.66685300 | -2.89872000 | 2.35875900  |
| H | 5.38553700  | -0.10673600 | -2.63172200 |
| C | -1.77764100 | -2.98779600 | 1.34893700  |
| C | -1.17994000 | -3.89781500 | -2.32705000 |
| C | 3.87049200  | -1.19063300 | -1.56994500 |
| H | -0.80973600 | -2.94579600 | -2.72865200 |
| C | -1.15430800 | -3.27924300 | 0.12793700  |
| C | -1.87307900 | -3.67722500 | -1.00728600 |
| C | -3.25710800 | -3.81882000 | -0.87806400 |
| H | 3.70861500  | -0.52728200 | 2.98845700  |
| H | 2.13336100  | -0.68976200 | 2.20052300  |
| H | 3.97718700  | -1.72493900 | -3.65080300 |
| H | 2.32959200  | -1.47274500 | -3.04545800 |
| H | -0.54375700 | -1.50438200 | 2.29492600  |
| H | -0.14363400 | -3.15367700 | 2.76625700  |
| H | -0.31646000 | -4.56576100 | -2.23155100 |
| H | -1.86881000 | -4.33042500 | -3.05791400 |
| C | 4.94530300  | -0.30077100 | -1.65660900 |
| C | -0.97731700 | -2.48469200 | 2.52284900  |
| C | 3.31811000  | -1.41276600 | -0.30254600 |
| C | 6.59810100  | 1.32742800  | -0.65777400 |
| H | 7.19754200  | 1.37492500  | 0.25739400  |
| H | 7.26265100  | 1.07269400  | -1.48980800 |
| H | 6.21181600  | 2.33771000  | -0.84814200 |
| C | -5.40724800 | -3.75263300 | 0.44568200  |
| H | -5.91595800 | -3.47909700 | -0.48473500 |
| H | -5.66019800 | -4.79927500 | 0.66069500  |
| H | -5.81993700 | -3.13776400 | 1.25070500  |
| C | -4.15002500 | 4.17741000  | 1.21006800  |
| H | -4.36620500 | 3.90492900  | 0.17315700  |
| H | -4.30670300 | 3.28781700  | 1.82606200  |
| H | -4.85570800 | 4.95432000  | 1.52190500  |
| C | -2.50118700 | 5.89997800  | 0.42546100  |
| H | -3.05575500 | 6.75403400  | 0.83050000  |
| H | -1.44592500 | 6.16919900  | 0.34932100  |
| H | -2.87280900 | 5.69820400  | -0.58358700 |
| C | -0.96138100 | 5.72923600  | 2.89738700  |
| H | -0.53379200 | 5.62105900  | 3.89868500  |
| H | -0.18813200 | 5.46595000  | 2.16918500  |
| H | -1.23951200 | 6.77754200  | 2.74989000  |
| C | -3.23427200 | 5.16165800  | 3.80481900  |
| H | -2.78069900 | 5.20553600  | 4.79994000  |

|   |             |             |             |
|---|-------------|-------------|-------------|
| H | -3.66921300 | 6.14302000  | 3.58501300  |
| H | -4.03692000 | 4.42164400  | 3.82833100  |
| N | -1.16592000 | 0.66201700  | 0.65797600  |
| C | -2.50627400 | 0.36456800  | 0.75479200  |
| C | -3.27228200 | 0.53384700  | 1.93741100  |
| C | -3.16142800 | -0.12971500 | -0.40131100 |
| C | -4.62992300 | 0.23118100  | 1.94700400  |
| H | -2.80224400 | 0.88896100  | 2.84719400  |
| C | -4.51759700 | -0.41386600 | -0.37894600 |
| H | -2.58382800 | -0.23762700 | -1.31425600 |
| C | -5.26505900 | -0.23334900 | 0.79121200  |
| H | -5.19885800 | 0.36230300  | 2.86386400  |
| H | -4.99918000 | -0.77658200 | -1.28220000 |
| H | -6.32849000 | -0.45334400 | 0.80209800  |
| C | 0.69011200  | -5.62125100 | 0.51430900  |
| H | 0.08205900  | -5.65344800 | 1.42602100  |
| H | 0.07095600  | -6.01492400 | -0.30004200 |
| H | 1.54217800  | -6.29263800 | 0.64864300  |
| C | 3.76636300  | -4.32867100 | 0.18047400  |
| H | 3.68382600  | -5.39616800 | 0.40066400  |
| H | 4.31946100  | -4.21544800 | -0.75912200 |
| H | 4.37018400  | -3.86183700 | 0.96729900  |
| I | -0.17867100 | 0.08110700  | -3.19752000 |

**TS12**

|    |             |             |             |
|----|-------------|-------------|-------------|
| Cu | -0.05779500 | -0.54062200 | -0.24304400 |
| C  | 0.22535300  | -1.80148000 | 1.15707600  |
| N  | -0.67357900 | -2.69712000 | 1.63932200  |
| C  | -0.11888000 | -3.51704100 | 2.63241600  |
| C  | 1.18109900  | -3.12550300 | 2.76279300  |
| N  | 1.36174500  | -2.06890600 | 1.86036900  |
| B  | -0.56840700 | 2.11804900  | -1.01230100 |
| O  | 0.20769700  | 3.28817000  | -1.17865800 |
| C  | 0.86329800  | 3.51302400  | 0.07880400  |
| C  | -0.21326000 | 2.99579100  | 1.09807700  |
| O  | -0.81424100 | 1.89846400  | 0.38721000  |
| C  | -1.34541000 | 1.40883500  | -2.13558000 |
| H  | -1.23260900 | 1.85438000  | -3.12903600 |
| C  | -2.63886900 | 0.67094300  | -1.99733800 |
| C  | -2.75988800 | -0.67447300 | -2.37143400 |
| C  | -3.99662100 | -1.31539700 | -2.33398600 |
| C  | -5.13401300 | -0.62316700 | -1.91133800 |
| C  | -5.01916500 | 0.70681100  | -1.50488000 |
| C  | -3.77903200 | 1.34599200  | -1.54432100 |

|   |             |             |             |
|---|-------------|-------------|-------------|
| H | -1.87207400 | -1.20617600 | -2.70155600 |
| H | -4.07484700 | -2.35622500 | -2.63595200 |
| H | -6.10046200 | -1.11844900 | -1.89391100 |
| H | -5.89649300 | 1.24860100  | -1.15970500 |
| H | -3.68353200 | 2.38232600  | -1.23181900 |
| H | 2.66163100  | -3.25740600 | -0.01062100 |
| C | -4.70999400 | -3.05755900 | 0.47501000  |
| C | -3.74737700 | -3.95820900 | 0.00628500  |
| H | -4.04960900 | -4.76910500 | -0.65252800 |
| C | -2.40100800 | -3.82954400 | 0.34507100  |
| C | -2.53228700 | -0.63140800 | 2.46856700  |
| H | -1.78558400 | -0.90298100 | 3.22267200  |
| C | -1.35718200 | -4.75146400 | -0.23527800 |
| H | -0.82565300 | -5.32554000 | 0.53207300  |
| H | 3.98553300  | 1.30456700  | 3.49385100  |
| C | 4.71079100  | 0.49514400  | 1.63576700  |
| C | 4.49292100  | -0.47399600 | 0.65481100  |
| H | 5.17630300  | -0.54394600 | -0.18792800 |
| H | -5.02521300 | -1.25255000 | 1.59470400  |
| C | 3.40908100  | -1.35628700 | 0.71394200  |
| C | 1.77594400  | -0.18574300 | 3.98752800  |
| C | -2.95917700 | -1.82245800 | 1.64786600  |
| H | 1.95181300  | -0.97148400 | 4.73232000  |
| C | 2.52893300  | -1.23613900 | 1.79658100  |
| C | 2.72676000  | -0.29338200 | 2.82001700  |
| C | 3.82758600  | 0.55832200  | 2.71895800  |
| H | -1.81346000 | -5.46159000 | -0.93032000 |
| H | -0.59916500 | -4.17659200 | -0.78090300 |
| H | -3.39284800 | -0.18889200 | 2.97886000  |
| H | -2.08535900 | 0.14059300  | 1.82916800  |
| H | 4.16039800  | -2.69984100 | -0.78669300 |
| H | 2.61659100  | -1.94900200 | -1.19642100 |
| H | 1.89585500  | 0.77673600  | 4.49127100  |
| H | 0.73477300  | -0.27125000 | 3.66449100  |
| C | -4.29500800 | -1.98818600 | 1.26936400  |
| C | 3.19935800  | -2.37718900 | -0.37417200 |
| C | -2.03753400 | -2.77836700 | 1.20030300  |
| C | -6.16461300 | -3.24214800 | 0.12262200  |
| H | -6.62370400 | -4.02630000 | 0.73884700  |
| H | -6.73145200 | -2.32028900 | 0.28005900  |
| H | -6.28552300 | -3.54009300 | -0.92450400 |
| C | 5.84497700  | 1.48153400  | 1.51055400  |
| H | 6.67606100  | 1.06671400  | 0.93149600  |
| H | 5.50789700  | 2.39054800  | 0.99571400  |

|   |             |             |             |
|---|-------------|-------------|-------------|
| H | 6.22641000  | 1.78283300  | 2.49177000  |
| C | 0.35985300  | 2.47783800  | 2.40950900  |
| H | 0.87369600  | 3.27571400  | 2.95933700  |
| H | -0.44669600 | 2.09294100  | 3.04319900  |
| H | 1.06672200  | 1.67015500  | 2.22485000  |
| C | -1.31590000 | 4.02787700  | 1.36462700  |
| H | -1.70861600 | 4.42076000  | 0.42219500  |
| H | -2.13580200 | 3.53721100  | 1.89902300  |
| H | -0.95701300 | 4.86575100  | 1.97270600  |
| C | 1.19567100  | 4.99713000  | 0.19493100  |
| H | 1.60553900  | 5.23230800  | 1.18438100  |
| H | 1.94545100  | 5.26629700  | -0.55657500 |
| H | 0.31125000  | 5.61517400  | 0.02444200  |
| C | 2.15421500  | 2.67974600  | 0.11215900  |
| H | 2.76033100  | 2.93521300  | -0.76223100 |
| H | 2.74287400  | 2.87140600  | 1.01540900  |
| H | 1.93839000  | 1.60914000  | 0.06442600  |
| N | -0.09364300 | 0.63218900  | -1.77470600 |
| C | 0.89296400  | 0.48255500  | -2.77728400 |
| C | 1.47297300  | 1.57858800  | -3.44365900 |
| C | 1.33201100  | -0.80797300 | -3.12362500 |
| C | 2.46448400  | 1.37831200  | -4.40344600 |
| H | 1.16238400  | 2.58059500  | -3.17258600 |
| C | 2.33009700  | -1.00225300 | -4.07846000 |
| H | 0.86071500  | -1.65827400 | -2.63610000 |
| C | 2.90565200  | 0.09246000  | -4.72544200 |
| H | 2.90477700  | 2.24051300  | -4.89889700 |
| H | 2.64807700  | -2.01269000 | -4.32505900 |
| H | 3.68105200  | -0.05374200 | -5.47230100 |
| C | 2.29593600  | -3.67236100 | 3.58739300  |
| H | 3.10606300  | -4.04784200 | 2.95080300  |
| H | 2.73207100  | -2.91953100 | 4.25165600  |
| H | 1.93892800  | -4.50211500 | 4.20278300  |
| C | -0.91847200 | -4.53995900 | 3.36448100  |
| H | -1.79256700 | -4.08262800 | 3.84232900  |
| H | -1.29101100 | -5.32989700 | 2.70314500  |
| H | -0.31075900 | -5.00774500 | 4.14325700  |

**IM17**

|    |             |             |             |
|----|-------------|-------------|-------------|
| Cu | -0.02056900 | -0.53841400 | -0.12336300 |
| C  | 0.19046000  | -1.93408200 | 1.14396000  |
| N  | -0.67927900 | -2.76199600 | 1.77268900  |
| C  | -0.02933500 | -3.58419400 | 2.70548300  |
| C  | 1.29714900  | -3.26358900 | 2.63572200  |

|   |             |             |             |
|---|-------------|-------------|-------------|
| N | 1.39982500  | -2.25454800 | 1.67368100  |
| B | -0.38156100 | 2.10409300  | -0.83181200 |
| O | 0.27201500  | 3.37648600  | -0.79318300 |
| C | 0.41895100  | 3.73217700  | 0.58594600  |
| C | -0.83145700 | 3.04763000  | 1.23843200  |
| O | -0.92128900 | 1.82568900  | 0.49496900  |
| C | -0.98526900 | 1.45394600  | -2.13763600 |
| H | -0.71272300 | 1.95257600  | -3.07106500 |
| C | -2.24250100 | 0.66328600  | -2.21944500 |
| C | -2.29256000 | -0.73288700 | -2.10417300 |
| C | -3.50482400 | -1.42218400 | -2.16488400 |
| C | -4.69960300 | -0.72838400 | -2.35366700 |
| C | -4.66694700 | 0.66441800  | -2.47515200 |
| C | -3.45579200 | 1.34818000  | -2.40544900 |
| H | -1.36739800 | -1.28845700 | -1.97300700 |
| H | -3.51179000 | -2.50300400 | -2.06408200 |
| H | -5.64339200 | -1.26384100 | -2.41405700 |
| H | -5.59081700 | 1.21949100  | -2.61880400 |
| H | -3.43650500 | 2.43237700  | -2.48388600 |
| H | 2.61685000  | -3.93657400 | -0.16066800 |
| C | -4.79811300 | -2.82756000 | 0.84783800  |
| C | -3.94503200 | -3.83218100 | 0.38334900  |
| H | -4.34662800 | -4.62750300 | -0.24004600 |
| C | -2.57723500 | -3.82197200 | 0.66722900  |
| C | -2.33309000 | -0.58733200 | 2.71797400  |
| H | -1.55567000 | -0.90109700 | 3.42271400  |
| C | -1.65362000 | -4.85658600 | 0.07332900  |
| H | -1.22383000 | -5.52356300 | 0.82977600  |
| H | 4.34822200  | 1.21009800  | 2.17161400  |
| C | 4.68230700  | 0.05583500  | 0.38556900  |
| C | 4.26296500  | -1.05429100 | -0.35082200 |
| H | 4.73497000  | -1.27149900 | -1.30400700 |
| H | -4.90503500 | -0.99598900 | 1.96927300  |
| C | 3.20916200  | -1.86421300 | 0.07927500  |
| C | 2.22491700  | -0.06034000 | 3.31383700  |
| C | -2.89980500 | -1.74927200 | 1.94423200  |
| H | 2.34859500  | -0.80905200 | 4.10593500  |
| C | 2.57882600  | -1.53055500 | 1.28454200  |
| C | 2.97299000  | -0.42971300 | 2.05833500  |
| C | 4.03897100  | 0.34219100  | 1.59452500  |
| H | -2.18741600 | -5.47717400 | -0.65164500 |
| H | -0.81253200 | -4.37665600 | -0.44023600 |
| H | -3.12215000 | -0.07704500 | 3.27854800  |
| H | -1.88145300 | 0.14079300  | 2.03351000  |



|   |             |             |             |
|---|-------------|-------------|-------------|
| H | 3.42261600  | -3.22186400 | -1.57550200 |
| H | 1.74833600  | -2.79906300 | -1.19428400 |
| H | 2.57272800  | 0.90020600  | 3.70281100  |
| H | 1.15093300  | 0.02130600  | 3.11484400  |
| C | -4.25736500 | -1.79656200 | 1.62045900  |
| C | 2.72756200  | -3.02287600 | -0.75608200 |
| C | -2.08256300 | -2.78582000 | 1.47102200  |
| C | -6.26073300 | -2.81785300 | 0.48121200  |
| H | -6.89262500 | -2.61762900 | 1.35384600  |
| H | -6.46165900 | -2.03030900 | -0.25515100 |
| H | -6.57296800 | -3.77218200 | 0.04592200  |
| C | 5.76921100  | 0.96299900  | -0.13267200 |
| H | 6.36098700  | 0.47426200  | -0.91223600 |
| H | 5.33030600  | 1.86604100  | -0.57341200 |
| H | 6.44570100  | 1.28001300  | 0.66871000  |
| C | -0.68110700 | 2.73345600  | 2.72435800  |
| H | -0.47651200 | 3.64546500  | 3.29754900  |
| H | -1.60585900 | 2.29445700  | 3.11278400  |
| H | 0.13058900  | 2.02432500  | 2.89781100  |
| C | -2.12217200 | 3.84434500  | 0.99918900  |
| H | -2.21202100 | 4.12010100  | -0.05532500 |
| H | -2.97681000 | 3.21188300  | 1.25968000  |
| H | -2.16401000 | 4.75527400  | 1.60708800  |
| C | 0.44777900  | 5.25391100  | 0.69600000  |
| H | 0.46715600  | 5.57453200  | 1.74453200  |
| H | 1.34626200  | 5.64252100  | 0.20469400  |
| H | -0.42145300 | 5.69938300  | 0.20721400  |
| C | 1.73545800  | 3.13914900  | 1.11395600  |
| H | 2.56678800  | 3.51201700  | 0.50658700  |
| H | 1.92440600  | 3.42161100  | 2.15602900  |
| H | 1.72937400  | 2.04848000  | 1.04213200  |
| N | 0.23223400  | 0.80928300  | -1.49381300 |
| C | 1.41683900  | 0.67372900  | -2.27022400 |
| C | 2.43232200  | 1.64025100  | -2.23986100 |
| C | 1.59720600  | -0.47056700 | -3.06427100 |
| C | 3.60408500  | 1.45133200  | -2.97422400 |
| H | 2.27265700  | 2.53762200  | -1.65643100 |
| C | 2.77157000  | -0.65785800 | -3.78964500 |
| H | 0.80452200  | -1.21301300 | -3.09464000 |
| C | 3.78729400  | 0.30160300  | -3.74405000 |
| H | 4.37910600  | 2.21340800  | -2.94737600 |
| H | 2.89430700  | -1.55426600 | -4.39266800 |
| H | 4.70310600  | 0.15915400  | -4.31132800 |
| C | 2.48860200  | -3.80098000 | 3.35113400  |

|   |             |             |            |
|---|-------------|-------------|------------|
| H | 3.21026600  | -4.23503500 | 2.64889900 |
| H | 3.01346200  | -3.01790100 | 3.91001900 |
| H | 2.19144400  | -4.58116000 | 4.05658700 |
| C | -0.76900500 | -4.53466000 | 3.58356500 |
| H | -1.54555200 | -4.01520600 | 4.15686600 |
| H | -1.26550700 | -5.32741300 | 3.01322500 |
| H | -0.08266500 | -5.00667700 | 4.29132000 |

**TS13**

|    |             |             |             |
|----|-------------|-------------|-------------|
| Cu | -0.55492500 | -0.39368700 | -0.15746300 |
| C  | -1.04365400 | 1.41103700  | -0.57093600 |
| N  | -2.11800000 | 1.82049300  | -1.29335700 |
| C  | -2.10954500 | 3.20489200  | -1.50805100 |
| C  | -0.98489200 | 3.67588800  | -0.89533900 |
| N  | -0.35514400 | 2.55715200  | -0.32999600 |
| B  | 0.56823300  | -1.84352600 | 2.23285400  |
| O  | 1.76415000  | -1.45073600 | 1.64089300  |
| C  | 2.81453500  | -1.95753700 | 2.49897900  |
| C  | 2.11173100  | -1.92833100 | 3.90396000  |
| O  | 0.72680600  | -2.18846800 | 3.56331200  |
| C  | -0.64867000 | -3.08673700 | 0.92380700  |
| H  | -1.25247700 | -3.83337100 | 1.42944200  |
| C  | -0.35634700 | -3.17174700 | -0.44582500 |
| C  | 0.41551100  | -2.14141800 | -1.10872800 |
| C  | 0.59403900  | -2.16636300 | -2.50835300 |
| C  | 0.03882000  | -3.16329200 | -3.29272700 |
| C  | -0.64496300 | -4.22053200 | -2.64273300 |
| C  | -0.81682300 | -4.24463500 | -1.27536900 |
| H  | 1.16056800  | -1.60400400 | -0.51640900 |
| H  | 1.21660000  | -1.39760800 | -2.96523000 |
| H  | 0.16388600  | -3.16758600 | -4.37134200 |
| H  | -1.04921000 | -5.03649800 | -3.23908600 |
| H  | -1.35626100 | -5.06685000 | -0.80963200 |
| H  | -0.66452000 | 3.27345100  | 3.52492200  |
| C  | -5.19245700 | -0.91132900 | -2.22901100 |
| C  | -5.25598800 | -0.12621700 | -1.07296100 |
| H  | -6.09541600 | -0.24293100 | -0.39230000 |
| C  | -4.25425000 | 0.79256800  | -0.75598400 |
| C  | -1.88880800 | 0.28123100  | -3.73534700 |
| H  | -1.07595700 | -0.36350200 | -3.38202500 |
| C  | -4.29450800 | 1.58868300  | 0.52237300  |
| H  | -5.24727600 | 1.44835700  | 1.03769100  |
| H  | 4.16464300  | 2.17864600  | 0.34937200  |
| C  | 3.06577100  | 2.63954100  | 2.13973700  |

|   |             |             |             |
|---|-------------|-------------|-------------|
| C | 1.79009700  | 2.85734600  | 2.67362600  |
| H | 1.68251400  | 3.04373100  | 3.73963500  |
| H | -4.04353000 | -1.35150000 | -3.99438500 |
| C | 0.64638000  | 2.83387500  | 1.87361600  |
| C | 2.19103600  | 2.00356700  | -1.53138100 |
| C | -3.07896400 | 0.16128800  | -2.81970300 |
| H | 1.70803800  | 2.75592400  | -2.16550500 |
| C | 0.81263200  | 2.59232800  | 0.50174800  |
| C | 2.06567800  | 2.34153900  | -0.06778400 |
| C | 3.18277200  | 2.37486100  | 0.77260300  |
| H | -3.50289400 | 1.26039600  | 1.20383300  |
| H | -4.15090900 | 2.66047500  | 0.34427800  |
| H | -1.50611200 | 1.30583100  | -3.77694300 |
| H | -2.14758800 | -0.03647400 | -4.74979500 |
| H | -1.31264400 | 2.09214800  | 2.37415300  |
| H | -1.29547400 | 3.80198500  | 1.95404500  |
| H | 3.24126400  | 1.92756300  | -1.82590100 |
| H | 1.70220100  | 1.04582900  | -1.74756200 |
| C | -4.10487600 | -0.74869700 | -3.09158100 |
| C | -0.72872500 | 3.01503200  | 2.46416700  |
| C | -3.17837400 | 0.91898700  | -1.64673200 |
| C | -6.25936500 | -1.93794000 | -2.52196500 |
| H | -6.41156700 | -2.06214700 | -3.59918700 |
| H | -5.97752300 | -2.91891700 | -2.11796900 |
| H | -7.21752900 | -1.66052000 | -2.07056200 |
| C | 4.28472900  | 2.70017900  | 3.02804800  |
| H | 4.54484500  | 3.73845900  | 3.27119300  |
| H | 4.11160800  | 2.17897100  | 3.97599300  |
| H | 5.15438200  | 2.24476800  | 2.54499000  |
| C | 2.58307500  | -2.99779400 | 4.88137400  |
| H | 2.41097500  | -3.99992400 | 4.48325400  |
| H | 3.65143300  | -2.88286100 | 5.09801500  |
| H | 2.03197700  | -2.90708600 | 5.82290200  |
| C | 2.15716400  | -0.54065800 | 4.55456000  |
| H | 3.16212500  | -0.29667400 | 4.91610500  |
| H | 1.84537900  | 0.23200200  | 3.84481500  |
| H | 1.47050700  | -0.52606100 | 5.40673800  |
| C | 4.02967200  | -1.04975100 | 2.36683000  |
| H | 4.81186400  | -1.33950300 | 3.07782900  |
| H | 4.44107200  | -1.13190100 | 1.35544400  |
| H | 3.76061100  | -0.00694900 | 2.53633400  |
| C | 3.14071600  | -3.37709400 | 2.02388800  |
| H | 2.26029300  | -4.02200800 | 2.09667200  |
| H | 3.43682500  | -3.33570000 | 0.97146400  |

|   |             |             |             |
|---|-------------|-------------|-------------|
| H | 3.95982400  | -3.81875100 | 2.60088100  |
| N | -0.70025000 | -1.73630700 | 1.52620800  |
| C | -1.91396900 | -1.34146200 | 2.15338500  |
| C | -1.90012900 | -0.45249600 | 3.24077900  |
| C | -3.14604400 | -1.79814900 | 1.66206100  |
| C | -3.09627700 | -0.04501200 | 3.82940600  |
| H | -0.94952600 | -0.10916300 | 3.63470100  |
| C | -4.33481500 | -1.38615700 | 2.25973900  |
| H | -3.15140700 | -2.47115200 | 0.81164500  |
| C | -4.32232900 | -0.51241500 | 3.34979500  |
| H | -3.06662000 | 0.63417600  | 4.67773900  |
| H | -5.27973800 | -1.74886700 | 1.86360200  |
| H | -5.25152000 | -0.19959600 | 3.81718600  |
| C | -0.41120100 | 5.04654100  | -0.78396700 |
| H | -1.05534400 | 5.77109600  | -1.28884200 |
| H | -0.30572400 | 5.35585300  | 0.26257300  |
| H | 0.58532000  | 5.10227800  | -1.23839100 |
| C | -3.17761000 | 3.88857600  | -2.29022800 |
| H | -4.16481100 | 3.73764400  | -1.83819400 |
| H | -2.98617900 | 4.96365100  | -2.33968600 |
| H | -3.23002000 | 3.50331600  | -3.31535800 |

**IM18**

|    |             |             |             |
|----|-------------|-------------|-------------|
| Cu | -0.85389600 | -0.11679400 | -0.14716000 |
| C  | -1.63358800 | 1.61528600  | -0.53252500 |
| N  | -2.72934600 | 2.01352200  | -1.22782500 |
| C  | -2.73267500 | 3.39938500  | -1.45253100 |
| C  | -1.60436300 | 3.88142600  | -0.85438200 |
| N  | -0.95508600 | 2.77031100  | -0.30416100 |
| B  | 0.88919200  | -2.82078800 | 2.78546200  |
| O  | 1.91361100  | -3.65876000 | 2.39622400  |
| C  | 2.96825100  | -3.53361600 | 3.37455800  |
| C  | 2.68585600  | -2.11791700 | 3.98960000  |
| O  | 1.24723400  | -2.01578700 | 3.85991700  |
| C  | -0.41065100 | -3.44152100 | 0.81751500  |
| H  | -0.92433200 | -4.39678900 | 0.77451300  |
| C  | 0.04643900  | -2.78891800 | -0.29209000 |
| C  | 0.68141000  | -1.46420900 | -0.22107800 |
| C  | 1.32613900  | -0.93099600 | -1.38953300 |
| C  | 1.17246300  | -1.49602500 | -2.63305500 |
| C  | 0.40559600  | -2.70309200 | -2.73268700 |
| C  | -0.12424700 | -3.31979500 | -1.63430900 |
| H  | 1.11499700  | -1.17515800 | 0.73744000  |
| H  | 1.94077300  | -0.04247200 | -1.26114600 |

|   |             |             |             |
|---|-------------|-------------|-------------|
| H | 1.62636100  | -1.05736900 | -3.51658000 |
| H | 0.26443300  | -3.15746400 | -3.71202900 |
| H | -0.65420100 | -4.26401300 | -1.74366900 |
| H | -0.54758000 | 2.85500800  | 3.61230400  |
| C | -5.60950600 | -0.77433800 | -2.55219300 |
| C | -5.88062900 | 0.07499400  | -1.47425900 |
| H | -6.83571500 | -0.00287300 | -0.96010300 |
| C | -4.94619900 | 1.01001900  | -1.02328000 |
| C | -2.06536200 | 0.32072600  | -3.47341300 |
| H | -1.30377900 | -0.25487000 | -2.93282300 |
| C | -5.23649600 | 1.87555100  | 0.17812100  |
| H | -6.09904400 | 1.48814900  | 0.72776100  |
| H | 3.61262200  | 2.59579700  | -0.54435100 |
| C | 2.86475400  | 2.57108500  | 1.47576000  |
| C | 1.71386300  | 2.61030300  | 2.26590600  |
| H | 1.80702700  | 2.55982800  | 3.34786100  |
| H | -4.14779200 | -1.31946100 | -4.03216500 |
| C | 0.43573400  | 2.70177200  | 1.70352800  |
| C | 1.32592100  | 2.69806500  | -2.02503500 |
| C | -3.40363700 | 0.25455100  | -2.78093100 |
| H | 0.73305400  | 3.54064200  | -2.39713600 |
| C | 0.34300900  | 2.76004700  | 0.30899000  |
| C | 1.47232500  | 2.71898200  | -0.52436400 |
| C | 2.72528100  | 2.63301200  | 0.08332800  |
| H | -4.38056900 | 1.90081700  | 0.85914200  |
| H | -5.46426000 | 2.91078000  | -0.10241000 |
| H | -1.69735100 | 1.34920100  | -3.54738900 |
| H | -2.13626600 | -0.09531800 | -4.48282800 |
| H | -1.30592200 | 1.71137400  | 2.49683800  |
| H | -1.52523200 | 3.44248000  | 2.24992000  |
| H | 2.30558100  | 2.73068100  | -2.50983200 |
| H | 0.81972800  | 1.78001000  | -2.34577200 |
| C | -4.37205700 | -0.66662400 | -3.19216200 |
| C | -0.80125000 | 2.68174000  | 2.56266500  |
| C | -3.71753200 | 1.08620600  | -1.69579800 |
| C | -6.61780300 | -1.80842800 | -2.99022000 |
| H | -6.51516000 | -2.04120200 | -4.05496600 |
| H | -6.48156700 | -2.74612300 | -2.43612500 |
| H | -7.64347200 | -1.46959100 | -2.81100600 |
| C | 4.23261200  | 2.43955500  | 2.09936600  |
| H | 4.93665800  | 3.16474600  | 1.67554000  |
| H | 4.19479500  | 2.59396300  | 3.18185800  |
| H | 4.64804000  | 1.44003600  | 1.92230800  |
| C | 3.05888300  | -1.96191600 | 5.45872000  |

|   |             |             |             |
|---|-------------|-------------|-------------|
| H | 2.51497800  | -2.67127000 | 6.08594300  |
| H | 4.13396600  | -2.11788200 | 5.60281300  |
| H | 2.81303000  | -0.95015500 | 5.79764700  |
| C | 3.28690700  | -0.97416700 | 3.16283400  |
| H | 4.37481400  | -0.92105600 | 3.27758500  |
| H | 3.05253700  | -1.08966500 | 2.10027300  |
| H | 2.85208200  | -0.02888400 | 3.50057200  |
| C | 4.30985100  | -3.66665700 | 2.66206800  |
| H | 5.13961300  | -3.48870400 | 3.35599000  |
| H | 4.41258700  | -4.67885800 | 2.25884200  |
| H | 4.38840700  | -2.96496100 | 1.82903500  |
| C | 2.78546500  | -4.66975700 | 4.38692300  |
| H | 1.83203700  | -4.57234500 | 4.91551300  |
| H | 2.77959100  | -5.62225400 | 3.84906200  |
| H | 3.59456500  | -4.69075400 | 5.12458900  |
| N | -0.35827100 | -2.77134800 | 2.09634800  |
| C | -1.39473100 | -1.85435200 | 2.37501400  |
| C | -1.47972500 | -1.14329200 | 3.58985700  |
| C | -2.41283800 | -1.64286000 | 1.41751100  |
| C | -2.54461800 | -0.27808800 | 3.83124400  |
| H | -0.71737200 | -1.28129700 | 4.34376700  |
| C | -3.47952600 | -0.77992200 | 1.67979200  |
| H | -2.38860500 | -2.22795000 | 0.50465100  |
| C | -3.55562500 | -0.08383500 | 2.88515600  |
| H | -2.58803600 | 0.24430000  | 4.78417800  |
| H | -4.24999500 | -0.66556700 | 0.92440600  |
| H | -4.38821700 | 0.58244200  | 3.09203800  |
| C | -1.06744200 | 5.26431500  | -0.71348000 |
| H | -1.71757000 | 5.98015900  | -1.22298300 |
| H | -1.00072700 | 5.55760900  | 0.34115700  |
| H | -0.06072300 | 5.35479600  | -1.13718700 |
| C | -3.78734800 | 4.08042200  | -2.25592700 |
| H | -4.75965900 | 4.08972000  | -1.75068800 |
| H | -3.50171900 | 5.11739700  | -2.45119400 |
| H | -3.92814200 | 3.57845400  | -3.21981000 |

**TS14**

|    |             |             |             |
|----|-------------|-------------|-------------|
| Cu | -0.95267000 | -0.89882900 | -0.41147000 |
| C  | -2.49848800 | 0.16955200  | -0.73762800 |
| N  | -3.00450100 | 0.38653900  | -1.98131600 |
| C  | -3.87411200 | 1.48263600  | -2.01072400 |
| C  | -3.91635800 | 1.96724900  | -0.73532700 |
| N  | -3.07511000 | 1.14023600  | 0.02335500  |
| B  | -1.12165000 | -2.93691300 | 2.98952200  |

|   |             |             |             |
|---|-------------|-------------|-------------|
| O | -2.08139300 | -3.84865700 | 2.58513200  |
| C | -3.08394000 | -3.90670900 | 3.62350200  |
| C | -2.29746400 | -3.38384200 | 4.88026500  |
| O | -1.32722000 | -2.48898400 | 4.28576700  |
| C | 0.04505400  | -3.21012200 | 0.86436300  |
| H | -0.41760500 | -4.18672600 | 0.80567400  |
| C | 0.52397900  | -2.60683800 | -0.28364700 |
| C | 1.08276600  | -1.24644700 | -0.37680700 |
| C | 1.64193100  | -0.79130600 | -1.61027500 |
| C | 1.55983700  | -1.51415000 | -2.77523400 |
| C | 0.90772500  | -2.78751000 | -2.72713600 |
| C | 0.41748300  | -3.30564200 | -1.56363400 |
| H | 1.40720100  | -0.74720400 | 0.52885300  |
| H | 2.14325600  | 0.17570800  | -1.60358900 |
| H | 1.96615800  | -1.13703800 | -3.70802400 |
| H | 0.80041500  | -3.36303800 | -3.64450900 |
| H | -0.05127500 | -4.28753300 | -1.55966800 |
| H | -5.69006400 | -0.34031900 | 2.56430200  |
| C | -1.75635800 | -2.01701500 | -5.21417600 |
| C | -2.85991400 | -2.38344100 | -4.43740400 |
| H | -3.38179300 | -3.31215100 | -4.65512600 |
| C | -3.29928500 | -1.59522200 | -3.37198600 |
| C | -0.72251200 | 1.23821500  | -3.49926400 |
| H | -0.15399800 | 1.06664200  | -2.57821800 |
| C | -4.45344700 | -2.02138300 | -2.50019700 |
| H | -4.93209200 | -2.91974400 | -2.89974200 |
| H | -0.48662100 | 2.15284800  | 3.66658300  |
| C | -2.34808100 | 1.20553300  | 4.17881300  |
| C | -3.55383200 | 0.71108500  | 3.67008700  |
| H | -4.29113400 | 0.29772700  | 4.35358000  |
| H | -0.22741000 | -0.53217100 | -5.50560900 |
| C | -3.82324900 | 0.70077600  | 2.30002500  |
| C | -0.61670700 | 2.33610500  | 0.96537700  |
| C | -1.49464100 | -0.00317800 | -3.86092600 |
| H | -1.07214300 | 2.92162900  | 0.15952700  |
| C | -2.85283500 | 1.23081100  | 1.43696600  |
| C | -1.65281500 | 1.78007700  | 1.90792700  |
| C | -1.42468800 | 1.75650900  | 3.28674400  |
| H | -4.10661400 | -2.24121600 | -1.48338800 |
| H | -5.21428100 | -1.23640000 | -2.41534200 |
| H | -1.37899800 | 2.09824400  | -3.32717100 |
| H | -0.01249100 | 1.49698800  | -4.28931600 |
| H | -4.85997800 | -0.71156300 | 1.04366500  |
| H | -5.71174400 | 0.81814600  | 1.22787100  |

|   |             |             |             |
|---|-------------|-------------|-------------|
| H | 0.09202000  | 2.97221000  | 1.50281500  |
| H | -0.05183100 | 1.52421500  | 0.48985500  |
| C | -1.09391400 | -0.82278500 | -4.91752400 |
| C | -5.09030100 | 0.08749900  | 1.75716100  |
| C | -2.60426400 | -0.40821400 | -3.10784000 |
| C | -1.25766800 | -2.91441500 | -6.31967400 |
| H | -0.85390000 | -2.33471100 | -7.15650300 |
| H | -0.45137700 | -3.56469100 | -5.95554500 |
| H | -2.05310500 | -3.56134600 | -6.70310400 |
| C | -2.01762900 | 1.07792500  | 5.64408700  |
| H | -1.36824100 | 1.89109900  | 5.98418500  |
| H | -2.91990500 | 1.07408900  | 6.26427600  |
| H | -1.48935900 | 0.13245000  | 5.82212200  |
| C | -3.13633000 | -2.60055700 | 5.88330600  |
| H | -3.58590500 | -1.71945500 | 5.42218900  |
| H | -3.93383000 | -3.22816000 | 6.29685300  |
| H | -2.50401700 | -2.26506700 | 6.71161700  |
| C | -1.50725500 | -4.48589200 | 5.59425400  |
| H | -2.16535400 | -5.17070500 | 6.13919300  |
| H | -0.91279600 | -5.06541800 | 4.88126200  |
| H | -0.82034800 | -4.02027200 | 6.30703500  |
| C | -3.59199100 | -5.33976200 | 3.73373200  |
| H | -4.30166000 | -5.43770700 | 4.56317200  |
| H | -4.10724500 | -5.61911300 | 2.80925900  |
| H | -2.77166200 | -6.04358000 | 3.88883800  |
| C | -4.21339500 | -2.96662100 | 3.19872900  |
| H | -3.84111600 | -1.94350600 | 3.11938600  |
| H | -4.57930700 | -3.27505400 | 2.21472900  |
| H | -5.05173900 | -2.98592900 | 3.90358900  |
| N | -0.02008800 | -2.59059000 | 2.15791700  |
| C | 1.10549000  | -1.90580600 | 2.68928400  |
| C | 0.92867900  | -0.81234900 | 3.55146900  |
| C | 2.40861300  | -2.28731400 | 2.33737800  |
| C | 2.03132400  | -0.13202900 | 4.06143600  |
| H | -0.07511700 | -0.49701300 | 3.80146000  |
| C | 3.50572500  | -1.59624800 | 2.84706500  |
| H | 2.53966500  | -3.11679100 | 1.65079000  |
| C | 3.32927700  | -0.51503800 | 3.71339600  |
| H | 1.87254000  | 0.71213600  | 4.72891300  |
| H | 4.50755500  | -1.90571000 | 2.56027200  |
| H | 4.18746300  | 0.02492200  | 4.10336600  |
| C | -4.60479400 | 3.15352100  | -0.15199800 |
| H | -5.15707200 | 3.68955100  | -0.92817500 |
| H | -5.31252300 | 2.87728600  | 0.63763000  |



|   |             |            |             |
|---|-------------|------------|-------------|
| H | -3.88245300 | 3.84834800 | 0.29255700  |
| C | -4.54385000 | 1.92357500 | -3.26653000 |
| H | -5.16938600 | 1.12657600 | -3.68576300 |
| H | -5.18099400 | 2.79117800 | -3.07648600 |
| H | -3.81277300 | 2.19730900 | -4.03626100 |

**IM19**

|    |             |             |             |
|----|-------------|-------------|-------------|
| Cu | -0.14995500 | 0.09906300  | -0.43983800 |
| C  | -1.89534700 | 0.91677700  | -0.28450000 |
| N  | -3.11645000 | 0.45409600  | -0.67174600 |
| C  | -4.09664200 | 1.45703800  | -0.63790900 |
| C  | -3.46593600 | 2.58346500  | -0.19789000 |
| N  | -2.13004900 | 2.22210600  | 0.01496200  |
| B  | 1.69888200  | -1.91803200 | 0.80551000  |
| O  | 2.13441400  | -2.93753300 | 1.63891300  |
| C  | 1.37759800  | -2.84413100 | 2.86759600  |
| C  | 0.05914600  | -2.15059500 | 2.38608300  |
| O  | 0.55815000  | -1.29679300 | 1.32687600  |
| C  | 1.68818700  | -0.33438000 | -1.10108800 |
| H  | 1.64536700  | -0.56308700 | -2.17169000 |
| C  | 2.43947300  | 0.93637700  | -0.89312100 |
| C  | 3.08883800  | 1.24423400  | 0.31851900  |
| C  | 3.78412100  | 2.43973200  | 0.48643700  |
| C  | 3.85492900  | 3.37764300  | -0.54656500 |
| C  | 3.20893800  | 3.09475600  | -1.75381000 |
| C  | 2.51655900  | 1.89931200  | -1.92151000 |
| H  | 3.06233800  | 0.51845500  | 1.12631900  |
| H  | 4.28616400  | 2.63583600  | 1.43164900  |
| H  | 4.40942300  | 4.30327000  | -0.41870400 |
| H  | 3.26035600  | 3.80417000  | -2.57739700 |
| H  | 2.03684100  | 1.68321900  | -2.87456900 |
| H  | -0.32614200 | 2.52534200  | -2.22172800 |
| C  | -3.75712800 | -3.57952000 | -1.74166500 |
| C  | -3.20004100 | -2.67776900 | -2.65515400 |
| H  | -2.92051600 | -3.02740700 | -3.64615800 |
| C  | -2.98268300 | -1.33762300 | -2.32874400 |
| C  | -4.25897000 | -1.30180400 | 1.28783100  |
| H  | -4.42707600 | -2.14959600 | 1.95764100  |
| C  | -2.34777200 | -0.38739500 | -3.31123800 |
| H  | -2.29438000 | -0.83644400 | -4.30694100 |
| H  | 0.32875700  | 4.21301100  | 3.32856000  |
| C  | 0.94105300  | 4.78714600  | 1.34749300  |
| C  | 0.68902300  | 4.62604000  | -0.01819700 |
| H  | 1.31500200  | 5.14199900  | -0.73890200 |

|   |             |             |             |
|---|-------------|-------------|-------------|
| H | -4.53573600 | -3.80297000 | 0.25096300  |
| C | -0.31999600 | 3.78292600  | -0.48316800 |
| C | -1.71977000 | 2.47603200  | 2.83425500  |
| C | -3.90913300 | -1.78033700 | -0.09935300 |
| H | -1.42979200 | 2.71755500  | 3.86071700  |
| C | -1.09690000 | 3.10950400  | 0.46845300  |
| C | -0.88537000 | 3.24875400  | 1.84491800  |
| C | 0.14174400  | 4.09794400  | 2.26353200  |
| H | -1.32952500 | -0.13267200 | -2.99096500 |
| H | -2.90452800 | 0.55373700  | -3.38315500 |
| H | -3.45600300 | -0.68627000 | 1.70533100  |
| H | -5.16776000 | -0.68757400 | 1.29431100  |
| H | -1.58945800 | 3.75923700  | -2.24150800 |
| H | 0.10161000  | 4.21266800  | -2.54873400 |
| H | -1.59161300 | 1.39853700  | 2.68725000  |
| H | -2.79024300 | 2.68799600  | 2.72486200  |
| C | -4.10914300 | -3.11263300 | -0.47270300 |
| C | -0.54840200 | 3.56487700  | -1.95573600 |
| C | -3.34736200 | -0.91057900 | -1.04325500 |
| C | -3.94270600 | -5.03052400 | -2.11336900 |
| H | -4.32161700 | -5.13593000 | -3.13582900 |
| H | -4.64269700 | -5.53104700 | -1.43717600 |
| H | -2.98970700 | -5.57255000 | -2.06391800 |
| C | 2.08498100  | 5.65141100  | 1.81331200  |
| H | 2.16444400  | 6.56740500  | 1.21765700  |
| H | 3.03232000  | 5.11000400  | 1.70439700  |
| H | 1.97561500  | 5.93438500  | 2.86509400  |
| C | -0.63544100 | -1.28690100 | 3.42919900  |
| H | 0.00530600  | -0.46607300 | 3.75806400  |
| H | -0.92008700 | -1.88536500 | 4.30203000  |
| H | -1.54685000 | -0.85725800 | 3.00259500  |
| C | -0.93111600 | -3.12667000 | 1.74362400  |
| H | -0.42448500 | -3.78194000 | 1.02860700  |
| H | -1.68558200 | -2.55772900 | 1.19614600  |
| H | -1.43437800 | -3.74797500 | 2.49227000  |
| C | 1.19539100  | -4.24619800 | 3.43602000  |
| H | 0.55988000  | -4.22322100 | 4.32857900  |
| H | 2.16874800  | -4.65734900 | 3.72123100  |
| H | 0.74591000  | -4.91834700 | 2.70192300  |
| C | 2.18570800  | -1.97194300 | 3.83441100  |
| H | 1.71314800  | -1.91456400 | 4.82060300  |
| H | 2.29972100  | -0.95653100 | 3.44201600  |
| H | 3.18315300  | -2.40539400 | 3.95120300  |
| N | 2.27623100  | -1.50707100 | -0.41252800 |

|   |             |             |             |
|---|-------------|-------------|-------------|
| C | 3.40324300  | -2.13830000 | -1.00050300 |
| C | 4.22038400  | -1.44930200 | -1.91431200 |
| C | 3.70868600  | -3.48543300 | -0.72609400 |
| C | 5.30878600  | -2.08191300 | -2.51374900 |
| H | 4.01811400  | -0.41194500 | -2.14313000 |
| C | 4.80170700  | -4.10439000 | -1.32665200 |
| H | 3.08693400  | -4.04427100 | -0.03940700 |
| C | 5.61357000  | -3.41179800 | -2.22668300 |
| H | 5.92555200  | -1.51911900 | -3.21018000 |
| H | 5.01117300  | -5.14595000 | -1.09453500 |
| H | 6.46287600  | -3.90028100 | -2.69609500 |
| C | -3.95453900 | 3.97188200  | 0.03438500  |
| H | -3.82112500 | 4.27591700  | 1.07924500  |
| H | -5.01741100 | 4.04909700  | -0.20903000 |
| H | -3.40836700 | 4.69509800  | -0.58241300 |
| C | -5.50086400 | 1.21687200  | -1.07606400 |
| H | -5.53646700 | 0.84532000  | -2.10694000 |
| H | -6.07489500 | 2.14598200  | -1.03036000 |
| H | -6.00857000 | 0.47493900  | -0.44916000 |

**TS1a**

|   |             |             |             |
|---|-------------|-------------|-------------|
| C | 6.74933300  | 2.42612000  | 2.74385000  |
| C | 5.86429400  | 1.51817700  | 3.32544500  |
| C | 5.76858200  | 0.21521100  | 2.83021600  |
| C | 6.55695500  | -0.17820200 | 1.74304300  |
| C | 7.44113100  | 0.73942500  | 1.15384200  |
| C | 7.54047200  | 2.03253700  | 1.66036700  |
| H | 5.24567900  | 1.82116600  | 4.16559400  |
| H | 5.07695000  | -0.48872800 | 3.28173500  |
| H | 8.03538600  | 0.44621400  | 0.29241900  |
| H | 8.22711200  | 2.73726400  | 1.20007900  |
| C | 10.35196300 | -3.99199600 | 2.18184400  |
| C | 9.77012200  | -3.09514300 | 3.08244900  |
| C | 8.58997500  | -2.43489200 | 2.74516800  |
| C | 7.98089400  | -2.67900400 | 1.50528300  |
| C | 8.57617800  | -3.56636400 | 0.59883300  |
| C | 9.75740000  | -4.22426300 | 0.94101500  |
| H | 10.24097300 | -2.90490900 | 4.04276900  |
| H | 8.14836900  | -1.72016700 | 3.43364100  |
| H | 8.12319400  | -3.71682700 | -0.37701300 |
| H | 10.22025100 | -4.90355100 | 0.23138900  |
| C | 2.84428400  | -3.80693000 | 3.10644400  |
| C | 4.12166100  | -3.97973300 | 3.64356500  |
| C | 5.22900900  | -3.40830800 | 3.01582500  |

|    |            |             |             |
|----|------------|-------------|-------------|
| C  | 5.06006800 | -2.66204000 | 1.84231300  |
| C  | 3.77636800 | -2.49966900 | 1.29589100  |
| C  | 2.67405100 | -3.06713300 | 1.93413400  |
| H  | 4.25726300 | -4.56205900 | 4.55055600  |
| H  | 6.22182200 | -3.54754400 | 3.43168500  |
| H  | 3.64459600 | -1.93404200 | 0.37736200  |
| H  | 1.68294300 | -2.93771900 | 1.50863500  |
| P  | 6.44679800 | -1.84089700 | 0.98692000  |
| Cu | 6.18946300 | -1.66676300 | -1.17841800 |
| B  | 4.82927400 | -0.24258700 | -1.92993400 |
| O  | 4.97122200 | 1.10241900  | -2.16718200 |
| C  | 3.82649500 | 1.78298800  | -1.57119700 |
| C  | 2.74446500 | 0.64322500  | -1.51636100 |
| O  | 3.56848800 | -0.56289300 | -1.47247200 |
| C  | 1.88650500 | 0.54363100  | -2.77838900 |
| H  | 1.31788200 | -0.39018400 | -2.74736600 |
| H  | 1.18390900 | 1.38057700  | -2.85128500 |
| H  | 2.50437700 | 0.52049500  | -3.67869700 |
| C  | 1.86249300 | 0.65629000  | -0.27277700 |
| H  | 1.28184400 | 1.58393200  | -0.21670500 |
| H  | 1.15903900 | -0.18163000 | -0.31436500 |
| H  | 2.45423900 | 0.55827600  | 0.64001400  |
| C  | 3.46313300 | 2.96983800  | -2.45516700 |
| H  | 2.56707500 | 3.47435600  | -2.07643900 |
| H  | 4.28587500 | 3.69139900  | -2.45547800 |
| H  | 3.28098300 | 2.66126100  | -3.48655600 |
| C  | 4.27468400 | 2.26657000  | -0.18924800 |
| H  | 5.16504500 | 2.89048400  | -0.30388600 |
| H  | 3.49538600 | 2.86094200  | 0.29896100  |
| H  | 4.53963300 | 1.43228700  | 0.46408300  |
| C  | 5.97058100 | -1.34211700 | -3.26813300 |
| H  | 6.16116100 | -0.39192500 | -3.78061300 |
| C  | 4.84173600 | -2.10258200 | -3.88957000 |
| C  | 4.55260500 | -3.41851000 | -3.50406400 |
| C  | 3.47079000 | -4.09412100 | -4.06221100 |
| C  | 2.66457600 | -3.46996400 | -5.01967900 |
| C  | 2.95653700 | -2.16637300 | -5.42079900 |
| C  | 4.03928800 | -1.48938200 | -4.85756000 |
| H  | 5.19337700 | -3.90199700 | -2.77345300 |
| H  | 3.25608600 | -5.11413500 | -3.75435500 |
| H  | 1.82166200 | -4.00036300 | -5.45402500 |
| H  | 2.34550100 | -1.67651900 | -6.17427800 |
| H  | 4.26896500 | -0.47304000 | -5.17003700 |
| N  | 7.10809400 | -2.11862000 | -2.97132300 |

|   |             |             |             |
|---|-------------|-------------|-------------|
| C | 8.26559200  | -1.41414500 | -2.63731500 |
| C | 8.34163200  | -0.01301000 | -2.41024900 |
| C | 9.45318100  | -2.16634900 | -2.44205700 |
| C | 9.53886400  | 0.57714900  | -1.98875100 |
| H | 7.46936000  | 0.61616900  | -2.54822600 |
| C | 10.62834500 | -1.56721900 | -2.02007800 |
| H | 9.40394000  | -3.23576400 | -2.62716500 |
| C | 10.68549300 | -0.18457300 | -1.78075100 |
| H | 9.56346200  | 1.65239100  | -1.82165000 |
| H | 11.51595500 | -2.17815800 | -1.87326700 |
| H | 11.60934000 | 0.28130400  | -1.45080700 |
| H | 6.82005400  | 3.43922800  | 3.12946800  |
| H | 1.98450000  | -4.25407300 | 3.59742000  |
| H | 11.27658100 | -4.49843800 | 2.44408800  |

**TS1a'**

|    |             |             |             |
|----|-------------|-------------|-------------|
| Cu | -0.19472100 | -0.37263100 | -0.29905900 |
| B  | -0.68955600 | -2.12922000 | 0.69509200  |
| O  | -1.86291100 | -2.60723200 | 1.25324400  |
| C  | -1.58386600 | -3.94407500 | 1.75341800  |
| C  | -0.05880000 | -3.84830700 | 2.09738800  |
| O  | 0.41499200  | -2.87714500 | 1.12331400  |
| C  | -0.17806600 | -1.49908800 | -2.25999800 |
| H  | -0.71540300 | -0.91355700 | -3.00331500 |
| C  | 1.21663300  | -1.78608900 | -2.49096800 |
| C  | 1.84002900  | -1.26828500 | -3.65279600 |
| C  | 3.19542300  | -1.45997000 | -3.88528900 |
| C  | 3.98170600  | -2.16074100 | -2.96111500 |
| C  | 3.37682500  | -2.68475900 | -1.81636200 |
| C  | 2.01359700  | -2.51928000 | -1.58096100 |
| H  | 1.24015100  | -0.70635800 | -4.36539200 |
| H  | 3.64536100  | -1.06202300 | -4.79187500 |
| H  | 5.04368600  | -2.30265800 | -3.13879500 |
| H  | 3.97315300  | -3.23974700 | -1.09624600 |
| H  | 1.55900700  | -2.94127400 | -0.69316000 |
| C  | 0.73075000  | -5.13887400 | 1.91112200  |
| H  | 0.35867900  | -5.92428900 | 2.57957000  |
| H  | 1.78533200  | -4.96322100 | 2.14760400  |
| H  | 0.67098700  | -5.49835300 | 0.88173300  |
| C  | 0.20737000  | -3.25817300 | 3.48581600  |
| H  | 1.27702300  | -3.04299800 | 3.57793400  |
| H  | -0.07252300 | -3.95519300 | 4.28274400  |
| H  | -0.34321300 | -2.32355000 | 3.62470200  |
| C  | -2.50133400 | -4.21377800 | 2.93880900  |

|   |             |             |             |
|---|-------------|-------------|-------------|
| H | -2.41293100 | -3.43289100 | 3.69740400  |
| H | -2.27022500 | -5.18147100 | 3.39943000  |
| H | -3.54126800 | -4.23833100 | 2.59816000  |
| C | -1.87530500 | -4.92597200 | 0.61374900  |
| H | -2.90907300 | -4.78937200 | 0.28465100  |
| H | -1.74094300 | -5.96566300 | 0.93089200  |
| H | -1.22260300 | -4.73167600 | -0.24211200 |
| N | -0.91573300 | -2.03099300 | -1.22512100 |
| C | -2.32907900 | -1.96934600 | -1.47489300 |
| C | -2.89497200 | -3.00374300 | -2.22882900 |
| C | -3.14191600 | -0.93666700 | -1.00083700 |
| C | -4.26365600 | -3.01244000 | -2.48624600 |
| H | -2.25114300 | -3.79747400 | -2.59407900 |
| C | -4.51518600 | -0.95430000 | -1.25239200 |
| H | -2.69686900 | -0.13687200 | -0.41391700 |
| C | -5.08113400 | -1.99012600 | -1.99395000 |
| H | -4.69418600 | -3.82229500 | -3.06876400 |
| H | -5.13929300 | -0.15155700 | -0.86946600 |
| H | -6.14889800 | -2.00066200 | -2.19291100 |
| C | 1.51824800  | 1.37132600  | 4.94457800  |
| C | 1.20720000  | 2.59082600  | 4.33998400  |
| C | 0.96122400  | 2.64751500  | 2.96775400  |
| C | 1.02469300  | 1.48060500  | 2.19388400  |
| C | 1.32163600  | 0.25489100  | 2.80652200  |
| C | 1.57469400  | 0.20588000  | 4.17708700  |
| H | 1.15036000  | 3.49692700  | 4.93670400  |
| H | 0.70362700  | 3.59381800  | 2.50121100  |
| H | 1.32808800  | -0.65675700 | 2.21566900  |
| H | 1.80050600  | -0.74680500 | 4.64689800  |
| C | 4.82811400  | 2.58344800  | -1.49604400 |
| C | 4.43756500  | 3.21625900  | -0.31171700 |
| C | 3.21449200  | 2.90353900  | 0.27813300  |
| C | 2.36662300  | 1.96199700  | -0.32559600 |
| C | 2.76411700  | 1.32806000  | -1.50923500 |
| C | 3.99349000  | 1.63787000  | -2.09159200 |
| H | 5.09145300  | 3.94638300  | 0.15697200  |
| H | 2.92486400  | 3.37925700  | 1.20980500  |
| H | 2.12301800  | 0.58273100  | -1.96588700 |
| H | 4.29492300  | 1.12272700  | -2.99785500 |
| C | -2.20682900 | 4.98695900  | -0.30663800 |
| C | -0.91118500 | 5.08728000  | -0.81374700 |
| C | 0.00925100  | 4.05822900  | -0.60270200 |
| C | -0.36710000 | 2.91994900  | 0.11895100  |
| C | -1.67417400 | 2.82092500  | 0.62553600  |

|   |             |            |             |
|---|-------------|------------|-------------|
| C | -2.58654200 | 3.85161800 | 0.41530100  |
| H | -0.61242400 | 5.96816400 | -1.37494000 |
| H | 1.01694500  | 4.13981900 | -0.99677700 |
| H | -1.96789900 | 1.93833100 | 1.18884900  |
| H | -3.59434600 | 3.76910200 | 0.81214000  |
| P | 0.74981900  | 1.49851300 | 0.38421700  |
| H | 1.70594500  | 1.32800500 | 6.01377700  |
| H | -2.92020900 | 5.78890300 | -0.47326900 |
| H | 5.78780700  | 2.82278000 | -1.94570500 |

**TS10'**

|    |             |             |             |
|----|-------------|-------------|-------------|
| Cu | -0.19901000 | 0.11329400  | -0.24306400 |
| C  | 0.47692300  | 1.77680900  | 0.33182600  |
| N  | -0.25686300 | 2.88195700  | 0.63030000  |
| C  | 0.53736900  | 3.89814800  | 1.18088600  |
| C  | 1.80787000  | 3.40264700  | 1.22399200  |
| N  | 1.74081100  | 2.10473600  | 0.69713000  |
| B  | -0.67588700 | -1.64388100 | 0.74561200  |
| O  | -1.85614300 | -2.16396900 | 1.25581000  |
| C  | -1.56851500 | -3.52609000 | 1.67716500  |
| C  | -0.05552900 | -3.42613500 | 2.06880100  |
| O  | 0.42776900  | -2.39224100 | 1.16874200  |
| C  | -0.03554000 | -0.96778600 | -2.18243000 |
| H  | -0.51165700 | -0.33121500 | -2.92633000 |
| C  | 1.33100600  | -1.37969500 | -2.40207200 |
| C  | 2.06349900  | -0.81589000 | -3.47335300 |
| C  | 3.36093500  | -1.22517600 | -3.75073600 |
| C  | 3.97970300  | -2.20327200 | -2.96207900 |
| C  | 3.27620300  | -2.75024200 | -1.88580200 |
| C  | 1.97343500  | -2.35236500 | -1.60232500 |
| H  | 1.58808400  | -0.05989500 | -4.09495200 |
| H  | 3.89369000  | -0.78688700 | -4.59152800 |
| H  | 4.99066700  | -2.53220800 | -3.18724800 |
| H  | 3.74709000  | -3.50306300 | -1.25809700 |
| H  | 1.43999100  | -2.77853300 | -0.76260500 |
| H  | 3.15847100  | 3.13891300  | -1.45846800 |
| C  | -4.41795700 | 2.92613200  | -0.05804000 |
| C  | -3.52698600 | 3.39307500  | -1.03217000 |
| H  | -3.91428400 | 3.74396400  | -1.98575600 |
| C  | -2.14878900 | 3.40076400  | -0.81842000 |
| C  | -1.97527900 | 1.83610100  | 2.67565900  |
| H  | -1.19016400 | 2.45896200  | 3.11748600  |
| C  | -1.18549600 | 3.84642200  | -1.88915700 |
| H  | -0.53224800 | 4.65528900  | -1.54116600 |

|   |             |             |             |
|---|-------------|-------------|-------------|
| H | 4.36377600  | -1.30352700 | 2.26811600  |
| C | 4.93303600  | -0.61901900 | 0.31064400  |
| C | 4.62916400  | 0.27378700  | -0.72326400 |
| H | 5.19729700  | 0.23342400  | -1.64747400 |
| H | -4.58050400 | 2.06414700  | 1.90571700  |
| C | 3.57746000  | 1.18162500  | -0.61760400 |
| C | 2.20778400  | 0.26991700  | 2.84147300  |
| C | -2.52646300 | 2.43637600  | 1.40843600  |
| H | 2.03631500  | 1.27170400  | 3.25141700  |
| C | 2.83897200  | 1.18950200  | 0.57387800  |
| C | 3.09262200  | 0.29969600  | 1.62300800  |
| C | 4.15388600  | -0.59708400 | 1.46879200  |
| H | -1.72234200 | 4.19751400  | -2.77459400 |
| H | -0.53316300 | 3.01672800  | -2.18637000 |
| H | -2.76701000 | 1.69496900  | 3.41668900  |
| H | -1.52858000 | 0.85777200  | 2.45559400  |
| H | 3.90540800  | 1.98577900  | -2.58654400 |
| H | 2.20168400  | 1.81774300  | -2.13571100 |
| H | 2.64636000  | -0.35345800 | 3.62581700  |
| H | 1.23061600  | -0.15059400 | 2.57843100  |
| C | -3.90169100 | 2.45115300  | 1.14997300  |
| C | 3.19632900  | 2.08549500  | -1.76112700 |
| C | -1.67273100 | 2.93108100  | 0.41480100  |
| C | -5.90416200 | 2.93132700  | -0.32108900 |
| H | -6.45027200 | 2.39906900  | 0.46361000  |
| H | -6.13643000 | 2.45326200  | -1.27960100 |
| H | -6.29664400 | 3.95505000  | -0.36602200 |
| C | 6.07546000  | -1.59183700 | 0.15947800  |
| H | 6.07178100  | -2.34022700 | 0.95798700  |
| H | 7.04458700  | -1.07732400 | 0.18804600  |
| H | 6.01207300  | -2.11528800 | -0.80034600 |
| C | 0.76225400  | -4.69032300 | 1.82912900  |
| H | 0.39017600  | -5.51979800 | 2.44223500  |
| H | 1.80744100  | -4.50852000 | 2.10040900  |
| H | 0.73323300  | -4.99134800 | 0.77972500  |
| C | 0.16103300  | -2.91782000 | 3.49777300  |
| H | 1.21936600  | -2.67373400 | 3.63018000  |
| H | -0.11704800 | -3.67056800 | 4.24332700  |
| H | -0.42362600 | -2.01114300 | 3.67979000  |
| C | -2.51311000 | -3.88659200 | 2.81630500  |
| H | -2.45814500 | -3.15587900 | 3.62644100  |
| H | -2.27800700 | -4.87841600 | 3.22017200  |
| H | -3.54288100 | -3.90527700 | 2.44554700  |
| C | -1.81276000 | -4.43563500 | 0.46796100  |



|   |             |             |             |
|---|-------------|-------------|-------------|
| H | -2.84027900 | -4.29410400 | 0.12121300  |
| H | -1.66809400 | -5.49171300 | 0.72013100  |
| H | -1.14433400 | -4.17329800 | -0.35682800 |
| N | -0.84163700 | -1.50592200 | -1.19922500 |
| C | -2.23779300 | -1.44955100 | -1.51699100 |
| C | -2.72349600 | -2.38429700 | -2.44185000 |
| C | -3.12171100 | -0.53136300 | -0.94144300 |
| C | -4.07713100 | -2.41220500 | -2.76676200 |
| H | -2.02767200 | -3.09073800 | -2.88387200 |
| C | -4.47964700 | -0.57128100 | -1.26264400 |
| H | -2.75020400 | 0.19468900  | -0.22645400 |
| C | -4.96482100 | -1.50852600 | -2.17337200 |
| H | -4.44140900 | -3.14629200 | -3.48055000 |
| H | -5.15390900 | 0.13922800  | -0.79415400 |
| H | -6.02148500 | -1.53433300 | -2.42486900 |
| C | 3.09129700  | 3.99033000  | 1.70025200  |
| H | 2.92986100  | 5.00169500  | 2.08226700  |
| H | 3.83142400  | 4.04343500  | 0.89301600  |
| H | 3.53293400  | 3.38735000  | 2.50217700  |
| C | -0.03668300 | 5.20827700  | 1.59750600  |
| H | -0.81293000 | 5.08128300  | 2.36152700  |
| H | -0.49871900 | 5.73357900  | 0.75287200  |
| H | 0.74426500  | 5.85205400  | 2.01043300  |

**TS2'**

|    |             |             |             |
|----|-------------|-------------|-------------|
| Cu | -0.21171500 | -0.46019800 | 0.47331900  |
| B  | -1.66582500 | 1.23678500  | -1.52616700 |
| O  | -0.80109200 | 0.19318900  | -1.74679700 |
| C  | -1.12705700 | -0.38857700 | -3.05277700 |
| C  | -1.84391300 | 0.82096300  | -3.75673200 |
| O  | -2.39965400 | 1.56780000  | -2.62738300 |
| C  | -1.73293100 | 1.99181000  | -0.13978100 |
| H  | -2.75858100 | 2.37047100  | -0.01368700 |
| C  | -0.79490600 | 3.20556000  | -0.21598500 |
| C  | 0.27339200  | 3.36546700  | 0.67271900  |
| C  | 1.10551800  | 4.48101400  | 0.58616600  |
| C  | 0.89068600  | 5.44586400  | -0.39681100 |
| C  | -0.16488300 | 5.28702400  | -1.29703000 |
| C  | -1.00096200 | 4.17443600  | -1.20825100 |
| H  | 0.45582100  | 2.61316800  | 1.43023600  |
| H  | 1.93570600  | 4.58289300  | 1.27833800  |
| H  | 1.54392300  | 6.31102900  | -0.46679300 |
| H  | -0.34192700 | 6.03230800  | -2.06809100 |
| H  | -1.82194200 | 4.05330200  | -1.90970400 |

|   |             |             |             |
|---|-------------|-------------|-------------|
| C | -0.87617700 | 1.77315500  | -4.46430800 |
| H | -1.42158800 | 2.67038100  | -4.77114600 |
| H | -0.06555400 | 2.08516400  | -3.79872700 |
| H | -0.43876100 | 1.31062200  | -5.35426400 |
| C | -2.98662100 | 0.42984400  | -4.68352500 |
| H | -3.76180600 | -0.12266900 | -4.14966300 |
| H | -3.44007300 | 1.32951900  | -5.11054300 |
| H | -2.61607800 | -0.19033200 | -5.50699200 |
| C | -2.04455900 | -1.57962800 | -2.78363500 |
| H | -2.27172600 | -2.11727900 | -3.70966600 |
| H | -1.54906400 | -2.26101400 | -2.08758600 |
| H | -2.98299200 | -1.26443800 | -2.32225100 |
| C | 0.16653600  | -0.85308600 | -3.70931300 |
| H | 0.60223200  | -1.67023500 | -3.12862300 |
| H | -0.03506900 | -1.22211900 | -4.72100500 |
| H | 0.90685400  | -0.05338300 | -3.77167200 |
| N | -1.39695900 | 1.06567800  | 0.93633700  |
| C | -1.77808100 | 1.37782000  | 2.20647500  |
| C | -2.42619400 | 2.58947700  | 2.58070400  |
| C | -1.50558200 | 0.43003700  | 3.23663500  |
| C | -2.76530000 | 2.82865900  | 3.90548800  |
| H | -2.62701200 | 3.34931000  | 1.83566000  |
| C | -1.85183400 | 0.68567200  | 4.55312600  |
| H | -1.05396900 | -0.51622200 | 2.95452300  |
| C | -2.48337700 | 1.88755600  | 4.90267200  |
| H | -3.24974600 | 3.76512100  | 4.16857300  |
| H | -1.64075700 | -0.06041600 | 5.31427100  |
| H | -2.75412700 | 2.08597300  | 5.93527000  |
| I | -1.13494500 | -2.87311100 | 1.02520000  |
| C | -5.16085600 | -0.02632000 | -1.00585300 |
| H | -6.19814600 | 0.21332000  | -0.74107200 |
| H | -5.19251200 | -0.85960200 | -1.72013100 |
| H | -4.73356200 | 0.83805200  | -1.52485600 |
| C | -4.34515900 | -0.40029300 | 0.23358900  |
| H | -3.29307200 | -0.56293400 | -0.02555900 |
| H | -4.35398900 | 0.43315400  | 0.94899300  |
| C | -4.86474000 | -1.66476100 | 0.92876400  |
| H | -4.83345600 | -2.51044300 | 0.22488600  |
| H | -5.94077000 | -1.52313800 | 1.15516000  |
| C | -4.12871000 | -2.02040300 | 2.17003600  |
| H | -4.24032600 | -3.00055600 | 2.61993000  |
| H | -3.58995600 | -1.26692400 | 2.73262800  |
| C | 3.58051600  | -3.44735800 | -2.94664900 |
| C | 4.12519300  | -2.16242600 | -2.93621100 |

|   |            |             |             |
|---|------------|-------------|-------------|
| C | 3.69459100 | -1.22461000 | -1.99627200 |
| C | 2.70786500 | -1.56599000 | -1.06061800 |
| C | 2.16462000 | -2.86025900 | -1.07370500 |
| C | 2.60404500 | -3.79501800 | -2.01014600 |
| H | 4.88632600 | -1.88651300 | -3.66092300 |
| H | 4.11914600 | -0.22653700 | -1.99822200 |
| H | 1.38516200 | -3.12579300 | -0.36566400 |
| H | 2.17244400 | -4.79188400 | -2.01293400 |
| C | 4.30451900 | -1.13077200 | 4.12931300  |
| C | 3.03398700 | -0.55158300 | 4.12549800  |
| C | 2.36515400 | -0.34600800 | 2.91953800  |
| C | 2.96979700 | -0.70734600 | 1.70691800  |
| C | 4.24344300 | -1.29134100 | 1.71629000  |
| C | 4.90664600 | -1.50247000 | 2.92509100  |
| H | 2.55788500 | -0.27113800 | 5.06067400  |
| H | 1.36716100 | 0.08420500  | 2.91788100  |
| H | 4.70904800 | -1.58304500 | 0.77974300  |
| H | 5.89207300 | -1.95985000 | 2.92746800  |
| C | 3.74727900 | 3.61276700  | -1.49828000 |
| C | 4.34650500 | 3.03902700  | -0.37743600 |
| C | 3.84967700 | 1.84615000  | 0.15447100  |
| C | 2.74142000 | 1.22465700  | -0.43084100 |
| C | 2.13020000 | 1.82067500  | -1.54558200 |
| C | 2.63594400 | 2.99988500  | -2.08228400 |
| H | 5.20701600 | 3.51543500  | 0.08435900  |
| H | 4.32944200 | 1.39662000  | 1.01740000  |
| H | 1.25052200 | 1.35714100  | -1.97463600 |
| H | 2.14599600 | 3.45772900  | -2.93629100 |
| P | 2.05202500 | -0.36708600 | 0.16442200  |
| H | 3.91370900 | -4.17402800 | -3.68246300 |
| H | 4.13457500 | 4.54121900  | -1.90805700 |
| H | 4.82183400 | -1.29984800 | 5.06949100  |

**TS8'**

|   |             |            |             |
|---|-------------|------------|-------------|
| C | 1.55865900  | 5.53920800 | -1.82489300 |
| C | 1.56570900  | 4.27376900 | -2.41308900 |
| C | 0.95409600  | 3.19557900 | -1.77013600 |
| C | 0.31085200  | 3.38198300 | -0.53970500 |
| C | 0.30377300  | 4.65652700 | 0.04560600  |
| C | 0.92965900  | 5.72717200 | -0.59121800 |
| H | 2.05455900  | 4.11859100 | -3.37092200 |
| H | 0.95573100  | 2.21220700 | -2.22843000 |
| H | -0.19337700 | 4.80920600 | 0.99797900  |
| H | 0.92245500  | 6.70954100 | -0.12715900 |

|   |             |             |             |
|---|-------------|-------------|-------------|
| C | -0.43722400 | 2.91006800  | 4.76041600  |
| C | -1.64294600 | 3.09762200  | 4.08427200  |
| C | -1.72404800 | 2.86759400  | 2.70816500  |
| C | -0.59936300 | 2.43391200  | 1.99438100  |
| C | 0.61859800  | 2.26948600  | 2.67918500  |
| C | 0.69653900  | 2.50688000  | 4.04976800  |
| H | -2.52548700 | 3.43023500  | 4.62414600  |
| H | -2.66633600 | 3.02215700  | 2.19512900  |
| H | 1.50868200  | 1.97052700  | 2.13487100  |
| H | 1.64311600  | 2.36750900  | 4.56460200  |
| C | -4.94607600 | 2.61973000  | -1.33300200 |
| C | -4.70314200 | 1.79901600  | -0.23142100 |
| C | -3.40419600 | 1.62760600  | 0.23919100  |
| C | -2.32554700 | 2.29692300  | -0.36258400 |
| C | -2.58029200 | 3.11789700  | -1.47027900 |
| C | -3.88060400 | 3.27187500  | -1.95322900 |
| H | -5.51660300 | 1.25772900  | 0.24064700  |
| H | -3.23671500 | 0.95855100  | 1.07389500  |
| H | -1.76392300 | 3.63445800  | -1.96198100 |
| H | -4.05749400 | 3.90771700  | -2.81636100 |
| P | -0.60636300 | 1.97518400  | 0.21005200  |
| C | -0.37729700 | -6.00658400 | -0.90259400 |
| C | -0.06581200 | -5.49480100 | 0.35823900  |
| C | -0.53907200 | -4.24256800 | 0.74521500  |
| C | -1.33591800 | -3.48827000 | -0.12936600 |
| C | -1.63707100 | -3.99980800 | -1.39907000 |
| C | -1.16153100 | -5.25466700 | -1.77994900 |
| H | 0.55680700  | -6.06019100 | 1.04513700  |
| H | -0.28183000 | -3.85535200 | 1.72297000  |
| H | -2.24122600 | -3.42039700 | -2.08878700 |
| H | -1.40385100 | -5.64258700 | -2.76544300 |
| C | -5.81634800 | -1.14009900 | -1.96076100 |
| C | -5.82966200 | -1.70507200 | -0.68385100 |
| C | -4.63602100 | -1.90225300 | 0.01057400  |
| C | -3.41111100 | -1.52911900 | -0.56234000 |
| C | -3.40962200 | -0.94846400 | -1.83720400 |
| C | -4.60217200 | -0.76535000 | -2.53537700 |
| H | -6.77107700 | -1.99679500 | -0.22577800 |
| H | -4.66418200 | -2.33768100 | 1.00300900  |
| H | -2.47451000 | -0.62479100 | -2.27858200 |
| H | -4.57805200 | -0.30896900 | -3.52057400 |
| C | -3.19148100 | -1.90134400 | 4.74673100  |
| C | -3.26958000 | -3.06371700 | 3.97623300  |
| C | -2.85030500 | -3.05644800 | 2.64535200  |

|    |             |             |             |
|----|-------------|-------------|-------------|
| C  | -2.33817000 | -1.88546300 | 2.06959900  |
| C  | -2.25545100 | -0.72861400 | 2.85599000  |
| C  | -2.68356700 | -0.72974200 | 4.18216900  |
| H  | -3.65715300 | -3.98038300 | 4.41205800  |
| H  | -2.90748200 | -3.96628700 | 2.05716300  |
| H  | -1.81672500 | 0.17264100  | 2.44564400  |
| H  | -2.59773900 | 0.17947500  | 4.77014800  |
| P  | -1.80202700 | -1.77262100 | 0.31527900  |
| Cu | 0.02527700  | -0.33029700 | -0.17654300 |
| B  | 3.73411300  | 0.40065400  | 0.06600900  |
| O  | 3.31051300  | 1.51582200  | 0.76827900  |
| C  | 4.41754800  | 2.45388800  | 0.78967200  |
| C  | 5.22927300  | 2.03498500  | -0.48959500 |
| O  | 4.91601400  | 0.62056300  | -0.60686800 |
| C  | 6.74124800  | 2.18124700  | -0.36769300 |
| H  | 7.13777600  | 1.58372900  | 0.45578900  |
| H  | 7.21810300  | 1.84366500  | -1.29304300 |
| H  | 7.01552200  | 3.22968000  | -0.20590900 |
| C  | 4.72755400  | 2.70604300  | -1.76873800 |
| H  | 3.64547500  | 2.60168200  | -1.86458100 |
| H  | 4.97296100  | 3.77260800  | -1.78779300 |
| H  | 5.19754400  | 2.22304200  | -2.63028600 |
| C  | 5.17827600  | 2.20192600  | 2.09535100  |
| H  | 4.48862300  | 2.32617700  | 2.93594200  |
| H  | 5.57535800  | 1.18259800  | 2.13111600  |
| H  | 6.00760800  | 2.90491400  | 2.22181800  |
| C  | 3.85634100  | 3.86884200  | 0.76171400  |
| H  | 3.20737900  | 4.02853600  | -0.09819900 |
| H  | 3.26593600  | 4.04892100  | 1.66554800  |
| H  | 4.66893900  | 4.60369300  | 0.73376500  |
| C  | 1.84538500  | -0.83896500 | 0.94896300  |
| H  | 1.73711300  | 0.13499400  | 1.40891500  |
| C  | 1.69596900  | -1.89629300 | 1.95377800  |
| C  | 0.79821200  | -1.64651900 | 3.01645300  |
| C  | 0.55867700  | -2.58325600 | 4.01174800  |
| C  | 1.23305000  | -3.81034100 | 3.99909400  |
| C  | 2.16405400  | -4.05682900 | 2.98786200  |
| C  | 2.39564500  | -3.12265500 | 1.97872600  |
| H  | 0.28444100  | -0.69239200 | 3.04279700  |
| H  | -0.16128300 | -2.35800500 | 4.79314500  |
| H  | 1.04506600  | -4.55163400 | 4.77053400  |
| H  | 2.71775000  | -4.99259700 | 2.97691400  |
| H  | 3.12191200  | -3.35080000 | 1.21130300  |
| N  | 2.99324500  | -0.82343300 | 0.08349600  |

|   |             |             |             |
|---|-------------|-------------|-------------|
| C | 3.26882600  | -1.92359700 | -0.77108600 |
| C | 2.24207900  | -2.80852300 | -1.13770200 |
| C | 4.56521900  | -2.15463100 | -1.26380600 |
| C | 2.49787500  | -3.87531400 | -1.99246000 |
| H | 1.24354600  | -2.65606400 | -0.75695500 |
| C | 4.80953100  | -3.22479900 | -2.12291300 |
| H | 5.37449500  | -1.49727300 | -0.97842600 |
| C | 3.78125300  | -4.09044500 | -2.49838100 |
| H | 1.67842500  | -4.53267800 | -2.26348700 |
| H | 5.81888700  | -3.38193700 | -2.49429800 |
| H | 3.97795100  | -4.92286100 | -3.16813500 |
| H | -0.00442500 | -6.98170300 | -1.20353200 |
| H | -3.51756900 | -1.91230900 | 5.78302700  |
| H | -5.95691300 | 2.73927400  | -1.71222300 |
| H | -0.37830000 | 3.08347900  | 5.83116200  |
| H | 2.04056800  | 6.37563900  | -2.32345400 |
| H | -6.74767700 | -0.98660900 | -2.49914400 |
| I | 0.19758400  | -0.41708800 | -2.88416200 |
| C | 2.50586100  | 1.54728800  | -7.00432500 |
| H | 3.54986400  | 1.82031000  | -7.20456500 |
| H | 1.98298700  | 2.45576000  | -6.67932400 |
| H | 2.05681100  | 1.22654600  | -7.95092500 |
| C | 2.41208200  | 0.45232600  | -5.94003900 |
| H | 1.36386000  | 0.18297600  | -5.76844400 |
| H | 2.91360000  | -0.45837700 | -6.29491200 |
| C | 3.03362500  | 0.87438500  | -4.60434000 |
| H | 2.54715200  | 1.79336200  | -4.24384500 |
| H | 4.08940600  | 1.16274400  | -4.78098300 |
| C | 2.99392200  | -0.16680200 | -3.54067000 |
| H | 3.29878100  | 0.09479200  | -2.53850400 |
| H | 3.07196400  | -1.21715000 | -3.79827700 |

**TS2-OA**

|    |             |             |             |
|----|-------------|-------------|-------------|
| Cu | -0.54000700 | -1.78420200 | -1.45048300 |
| B  | -4.06808800 | 0.46935300  | -1.93317300 |
| O  | -4.66347200 | 0.12903000  | -0.74312500 |
| C  | -6.02443200 | 0.63622100  | -0.79095700 |
| C  | -5.90544600 | 1.80173300  | -1.83628300 |
| O  | -4.81123200 | 1.34349100  | -2.68228900 |
| C  | -2.67577200 | -0.13471800 | -2.38174500 |
| H  | -2.25619200 | 0.49394500  | -3.19091400 |
| C  | -2.88712600 | -1.52663600 | -2.95714600 |
| C  | -3.35194700 | -2.56626500 | -2.13255300 |
| C  | -3.49497700 | -3.86025200 | -2.63343300 |

|   |             |             |             |
|---|-------------|-------------|-------------|
| C | -3.17519000 | -4.13895600 | -3.96437800 |
| C | -2.72511700 | -3.11098700 | -4.79357000 |
| C | -2.58502100 | -1.81625400 | -4.29229300 |
| H | -3.60820800 | -2.34916100 | -1.10268400 |
| H | -3.85784900 | -4.65036100 | -1.98105400 |
| H | -3.27811800 | -5.14851600 | -4.35248500 |
| H | -2.46788500 | -3.31857600 | -5.82829100 |
| H | -2.21537700 | -1.02313700 | -4.93705000 |
| C | -7.13731900 | 2.01663200  | -2.70650800 |
| H | -8.00257500 | 2.28937600  | -2.09170500 |
| H | -6.95126900 | 2.83200100  | -3.41234100 |
| H | -7.38422000 | 1.12110300  | -3.28083200 |
| C | -5.44769100 | 3.12275100  | -1.20972000 |
| H | -4.55660600 | 2.97730900  | -0.59193900 |
| H | -5.19211000 | 3.82332900  | -2.01051800 |
| H | -6.23582900 | 3.57171100  | -0.59662200 |
| C | -6.43504100 | 1.07374100  | 0.60953200  |
| H | -7.41303600 | 1.56769700  | 0.59005100  |
| H | -6.51345700 | 0.19852500  | 1.26237100  |
| H | -5.70344000 | 1.75921600  | 1.04239300  |
| C | -6.90144200 | -0.52329600 | -1.27214900 |
| H | -6.75976700 | -1.37342900 | -0.59803200 |
| H | -7.96265300 | -0.25431400 | -1.27681700 |
| H | -6.61454900 | -0.84052500 | -2.27933900 |
| N | -1.77733900 | -0.24495900 | -1.22896900 |
| C | -1.37867700 | 0.91856300  | -0.63045100 |
| C | -1.67506900 | 2.22312800  | -1.11316900 |
| C | -0.61199000 | 0.84399800  | 0.56799200  |
| C | -1.23164600 | 3.35992500  | -0.43284300 |
| H | -2.25236800 | 2.34927800  | -2.02237700 |
| C | -0.17692200 | 1.98034900  | 1.22817100  |
| H | -0.37674700 | -0.13448800 | 0.96955500  |
| C | -0.47674700 | 3.25955700  | 0.73510500  |
| H | -1.47734500 | 4.34033300  | -0.83531800 |
| H | 0.40378600  | 1.86922000  | 2.14119700  |
| H | -0.13182900 | 4.14931500  | 1.25286400  |
| C | 3.15128500  | 1.65332700  | -0.19072100 |
| H | 2.65651900  | 1.33292400  | 0.73186900  |
| H | 3.37290900  | 2.72252800  | -0.10234000 |
| H | 4.10179700  | 1.11215100  | -0.27116300 |
| C | 2.25269900  | 1.38533400  | -1.40074500 |
| H | 1.33229900  | 1.97059100  | -1.31424900 |
| H | 2.75618000  | 1.69788600  | -2.32507400 |
| C | 1.88969200  | -0.11696100 | -1.48522600 |

|   |             |             |             |
|---|-------------|-------------|-------------|
| H | 1.38477600  | -0.38089700 | -0.55129000 |
| H | 2.79965200  | -0.72244100 | -1.54636400 |
| C | 1.01862200  | -0.37363100 | -2.67342700 |
| H | 1.51442300  | -0.40111300 | -3.63519700 |
| H | 0.06000000  | 0.13272900  | -2.71044600 |
| I | 1.02871900  | -3.05078200 | -3.14265100 |
| C | 3.06234300  | -1.35003100 | 2.81863900  |
| C | 3.27240600  | -2.06597200 | 1.63603300  |
| C | 2.19729200  | -2.65051300 | 0.97191100  |
| C | 0.89663600  | -2.53938900 | 1.49282700  |
| C | 0.69408700  | -1.83480000 | 2.68589500  |
| C | 1.77392000  | -1.23830000 | 3.34147400  |
| H | 4.27369600  | -2.15713000 | 1.22454200  |
| H | 2.35820900  | -3.18233700 | 0.03791300  |
| H | -0.30724900 | -1.74141900 | 3.09317900  |
| H | 1.60480200  | -0.68726300 | 4.26238200  |
| C | 0.18712800  | -7.68628000 | -0.08888000 |
| C | 0.76332700  | -7.04695900 | 1.01101400  |
| C | 0.58298500  | -5.67624800 | 1.19697800  |
| C | -0.17882100 | -4.93627300 | 0.28196500  |
| C | -0.74296400 | -5.58046100 | -0.82910400 |
| C | -0.56484800 | -6.95168600 | -1.00784400 |
| H | 1.35466800  | -7.61520100 | 1.72365300  |
| H | 1.03920700  | -5.17782500 | 2.04682400  |
| H | -1.30802400 | -5.00415400 | -1.55484700 |
| H | -1.00264700 | -7.44327400 | -1.87200800 |
| C | -4.21697100 | -2.73550800 | 3.18005500  |
| C | -3.93994100 | -1.78773300 | 2.19440100  |
| C | -2.81699400 | -1.93007700 | 1.37794500  |
| C | -1.96211000 | -3.02999800 | 1.55031200  |
| C | -2.24738700 | -3.98553300 | 2.53733100  |
| C | -3.37104300 | -3.83603200 | 3.34863400  |
| H | -4.59344300 | -0.93467700 | 2.04351000  |
| H | -2.61515500 | -1.20536100 | 0.59309400  |
| H | -1.59835100 | -4.84658000 | 2.66383800  |
| H | -3.58910100 | -4.57938100 | 4.11059900  |
| P | -0.49367400 | -3.14757000 | 0.46556300  |
| H | -5.09323800 | -2.62461800 | 3.81329200  |
| H | 0.33143400  | -8.75334900 | -0.23330800 |
| H | 3.90011000  | -0.88251200 | 3.32796500  |

**TS8-OA**

|   |            |            |             |
|---|------------|------------|-------------|
| C | 5.58424900 | 5.49033000 | -0.58079300 |
| C | 5.77695100 | 5.18750700 | -1.93069700 |



|    |             |             |             |
|----|-------------|-------------|-------------|
| C  | 6.47055100  | 4.03534400  | -2.29389900 |
| C  | 6.99231000  | 3.18241200  | -1.31040300 |
| C  | 6.79073000  | 3.48727400  | 0.04114600  |
| C  | 6.08819900  | 4.63804900  | 0.40272000  |
| H  | 5.37439000  | 5.84040900  | -2.69975700 |
| H  | 6.59733300  | 3.78434900  | -3.34311500 |
| H  | 7.17892600  | 2.82535900  | 0.80872300  |
| H  | 5.93315400  | 4.86665500  | 1.45349200  |
| C  | 12.30833000 | 3.11454500  | -2.28358800 |
| C  | 11.42899200 | 3.86407700  | -1.49954200 |
| C  | 10.09648900 | 3.47045000  | -1.36957600 |
| C  | 9.63877800  | 2.31868600  | -2.02519500 |
| C  | 10.52090100 | 1.57686900  | -2.82167200 |
| C  | 11.85121300 | 1.97351100  | -2.94535100 |
| H  | 11.77848200 | 4.75842900  | -0.99096800 |
| H  | 9.41378000  | 4.05790200  | -0.76409900 |
| H  | 10.15426300 | 0.70719000  | -3.35244200 |
| H  | 12.52115300 | 1.40437300  | -3.58189700 |
| C  | 8.01763900  | -1.17216400 | 1.75506200  |
| C  | 6.98430000  | -1.23601800 | 0.81707100  |
| C  | 6.96398300  | -0.35326200 | -0.26205400 |
| C  | 7.97487600  | 0.60829000  | -0.41206900 |
| C  | 9.00332900  | 0.67181000  | 0.53679300  |
| C  | 9.02345800  | -0.21456500 | 1.61470000  |
| H  | 6.19515000  | -1.97527100 | 0.92301300  |
| H  | 6.15695500  | -0.39906000 | -0.98632000 |
| H  | 9.79537100  | 1.40483100  | 0.42298300  |
| H  | 9.82893100  | -0.16004800 | 2.34175200  |
| P  | 7.91896400  | 1.71286500  | -1.87971600 |
| Cu | 6.93858500  | 0.58025700  | -3.67516600 |
| B  | 8.71595700  | -2.08902300 | -4.58496700 |
| O  | 9.04652500  | -3.43033600 | -4.58792800 |
| C  | 9.63426900  | -3.72443100 | -3.29390900 |
| C  | 10.17148500 | -2.32180600 | -2.84911000 |
| O  | 9.20612400  | -1.42666500 | -3.46885400 |
| C  | 11.54453200 | -2.00101600 | -3.44906400 |
| H  | 11.78315600 | -0.95192800 | -3.26122700 |
| H  | 12.32727500 | -2.61718800 | -2.99556900 |
| H  | 11.55412600 | -2.16645600 | -4.53030800 |
| C  | 10.18075200 | -2.07143400 | -1.34820100 |
| H  | 10.83887600 | -2.78826400 | -0.84407400 |
| H  | 10.55556500 | -1.06480600 | -1.14675400 |
| H  | 9.18193700  | -2.14544900 | -0.91651600 |
| C  | 10.69864900 | -4.79802200 | -3.48170500 |

|   |             |             |              |
|---|-------------|-------------|--------------|
| H | 11.23196100 | -4.98258400 | -2.54255800  |
| H | 10.22669600 | -5.73413500 | -3.79615000  |
| H | 11.42179200 | -4.51056200 | -4.24738400  |
| C | 8.51444400  | -4.23754400 | -2.38304000  |
| H | 8.02020100  | -5.08523000 | -2.86715000  |
| H | 8.90592300  | -4.56987600 | -1.41643600  |
| H | 7.76659900  | -3.46065500 | -2.19806700  |
| C | 7.75196400  | 0.01514800  | -5.47935600  |
| H | 6.88335500  | 0.29277900  | -6.08590200  |
| C | 8.90306400  | 0.89726300  | -5.77368600  |
| C | 8.73348600  | 2.29794800  | -5.72011600  |
| C | 9.79332600  | 3.16593900  | -5.95070100  |
| C | 11.06583800 | 2.66590000  | -6.24741000  |
| C | 11.24842600 | 1.28478900  | -6.32311100  |
| C | 10.18482000 | 0.41282900  | -6.09108600  |
| H | 7.74866800  | 2.69648300  | -5.48153000  |
| H | 9.63116000  | 4.23915000  | -5.89240000  |
| H | 11.89709200 | 3.34352600  | -6.41809300  |
| H | 12.22650900 | 0.87904800  | -6.57148200  |
| H | 10.33663100 | -0.65784500 | -6.17956500  |
| N | 7.97086500  | -1.41897200 | -5.59565100  |
| C | 7.50059000  | -2.07502000 | -6.76492400  |
| C | 7.46770900  | -1.38796800 | -7.98888100  |
| C | 7.03336400  | -3.39941800 | -6.72158700  |
| C | 6.97513700  | -2.00944900 | -9.13561300  |
| H | 7.84947100  | -0.37462900 | -8.04049700  |
| C | 6.55138500  | -4.01365400 | -7.87457400  |
| H | 7.05645700  | -3.94090800 | -5.78515100  |
| C | 6.51217500  | -3.32457300 | -9.08889500  |
| H | 6.96202900  | -1.45922400 | -10.07264900 |
| H | 6.19303700  | -5.03833800 | -7.81863500  |
| H | 6.12692200  | -3.80558900 | -9.98312700  |
| H | 8.03819400  | -1.86530600 | 2.59126700   |
| H | 13.34359300 | 3.42725100  | -2.38844600  |
| H | 5.03490100  | 6.38350400  | -0.29698500  |
| C | 3.78173200  | -4.69981600 | -3.04479100  |
| H | 3.83845300  | -4.68505000 | -1.94978500  |
| H | 3.97485000  | -5.72550500 | -3.37805800  |
| H | 2.75514000  | -4.44117100 | -3.32879800  |
| C | 4.78721800  | -3.72333200 | -3.66228000  |
| H | 5.80707700  | -4.01596700 | -3.38649100  |
| H | 4.73704800  | -3.77350000 | -4.75675600  |
| C | 4.52315800  | -2.26841400 | -3.20907400  |
| H | 4.56926300  | -2.21277200 | -2.11500000  |

|   |            |             |             |
|---|------------|-------------|-------------|
| H | 3.51190700 | -1.97760100 | -3.50632800 |
| C | 5.55325400 | -1.37090700 | -3.83551400 |
| H | 5.50425000 | -1.26853300 | -4.91216000 |
| H | 6.55939300 | -1.55502100 | -3.46123600 |
| I | 4.33168300 | 0.95409200  | -3.06546600 |

**TS11-OA**

|    |             |             |             |
|----|-------------|-------------|-------------|
| Cu | 0.07042000  | -0.81956400 | -0.54291900 |
| C  | 0.36107900  | -1.99544700 | 1.00193000  |
| N  | -0.64674500 | -2.68584400 | 1.59210500  |
| C  | -0.22246100 | -3.35469600 | 2.74669600  |
| C  | 1.10791100  | -3.07735800 | 2.87587800  |
| N  | 1.43387100  | -2.24470900 | 1.79466700  |
| B  | -1.67811800 | 1.26646200  | -3.21996700 |
| O  | -0.40105400 | 1.39216600  | -3.70438100 |
| C  | -0.48368800 | 1.87621200  | -5.06872000 |
| C  | -1.94420000 | 1.46188400  | -5.47368700 |
| O  | -2.63113500 | 1.45799100  | -4.18802700 |
| C  | -1.98072900 | 0.81067000  | -1.73146600 |
| H  | -2.15404400 | -0.27018800 | -1.86571300 |
| C  | -3.29053900 | 1.33036700  | -1.14436300 |
| C  | -3.33787700 | 2.00485600  | 0.07940100  |
| C  | -4.55804900 | 2.40718800  | 0.62872800  |
| C  | -5.75408000 | 2.14499800  | -0.03844400 |
| C  | -5.71604600 | 1.48195500  | -1.26856700 |
| C  | -4.49841600 | 1.07748200  | -1.81260000 |
| H  | -2.41621700 | 2.20452300  | 0.61061100  |
| H  | -4.56902600 | 2.92868100  | 1.58265900  |
| H  | -6.70331700 | 2.45791600  | 0.38787800  |
| H  | -6.63887600 | 1.27771300  | -1.80601400 |
| H  | -4.47722100 | 0.56394200  | -2.76830600 |
| H  | 2.89611500  | -4.32950000 | 0.71687300  |
| C  | -4.51145400 | -2.41751000 | -0.07268400 |
| C  | -3.69456300 | -3.51872300 | -0.34569500 |
| H  | -4.04729900 | -4.28926600 | -1.02672900 |
| C  | -2.42012900 | -3.64612900 | 0.21302800  |
| C  | -2.25015200 | -0.41429500 | 2.27049900  |
| H  | -1.74986100 | -0.81486800 | 3.15948300  |
| C  | -1.51712700 | -4.79732500 | -0.14756100 |
| H  | -1.11424500 | -5.30098700 | 0.73856400  |
| H  | 4.47965300  | 1.13819400  | 2.29690800  |
| C  | 5.14981300  | -0.42398400 | 0.97869900  |
| C  | 4.81312400  | -1.65388100 | 0.39950500  |
| H  | 5.51278300  | -2.13091000 | -0.28259600 |

|   |             |             |             |
|---|-------------|-------------|-------------|
| H | -4.65112300 | -0.54895800 | 0.98827800  |
| C | 3.59277800  | -2.27970700 | 0.66054900  |
| C | 2.02862100  | 0.23880000  | 3.09346100  |
| C | -2.77561400 | -1.51212000 | 1.38153900  |
| H | 1.94100400  | -0.31826100 | 4.03469300  |
| C | 2.71030400  | -1.64527900 | 1.54648200  |
| C | 3.00779600  | -0.41831700 | 2.15266000  |
| C | 4.23583500  | 0.17884000  | 1.84732700  |
| H | -2.05565000 | -5.53780800 | -0.74543100 |
| H | -0.66653900 | -4.43958400 | -0.73936100 |
| H | -3.06132600 | 0.24404300  | 2.59045100  |
| H | -1.52169000 | 0.19219900  | 1.71959900  |
| H | 4.04331100  | -3.97483800 | -0.58979400 |
| H | 2.35990400  | -3.42099900 | -0.69286200 |
| H | 2.34487700  | 1.25739000  | 3.33354700  |
| H | 1.02666100  | 0.28711200  | 2.65615500  |
| C | -4.03772700 | -1.42329600 | 0.79084600  |
| C | 3.20652900  | -3.57227800 | -0.01215400 |
| C | -1.98686300 | -2.63147600 | 1.07443400  |
| C | -5.88419400 | -2.29879900 | -0.68709400 |
| H | -6.66700300 | -2.54343200 | 0.04303600  |
| H | -6.06662100 | -1.27612900 | -1.03056400 |
| H | -6.00129100 | -2.97747300 | -1.53794300 |
| C | 6.47353600  | 0.22998200  | 0.66536200  |
| H | 6.62716200  | 0.31530000  | -0.41626300 |
| H | 6.53359400  | 1.23405300  | 1.09550600  |
| H | 7.30999300  | -0.35656500 | 1.06533400  |
| C | -2.65833300 | 2.43782400  | -6.39995500 |
| H | -2.12825900 | 2.52091400  | -7.35553600 |
| H | -3.67119400 | 2.07653000  | -6.60318500 |
| H | -2.73581900 | 3.43162800  | -5.95406400 |
| C | -2.03390400 | 0.03413300  | -6.01952900 |
| H | -1.52944200 | -0.67520700 | -5.35634100 |
| H | -3.08801500 | -0.25201300 | -6.08723500 |
| H | -1.59119700 | -0.04112400 | -7.01814000 |
| C | 0.62435700  | 1.21091900  | -5.87758500 |
| H | 0.54669800  | 1.47706800  | -6.93773800 |
| H | 1.59855100  | 1.55412700  | -5.51339100 |
| H | 0.58871800  | 0.12393800  | -5.78008900 |
| C | -0.27365800 | 3.39171000  | -5.00926500 |
| H | 0.67403700  | 3.59811900  | -4.50381500 |
| H | -0.24303200 | 3.83298800  | -6.01088700 |
| H | -1.06720600 | 3.87770400  | -4.43470000 |
| N | -0.82698500 | 0.90385200  | -0.83549900 |

|   |             |             |             |
|---|-------------|-------------|-------------|
| C | -0.20105900 | 2.10147600  | -0.68802600 |
| C | -0.64414200 | 3.33110100  | -1.26115600 |
| C | 0.98567000  | 2.16870000  | 0.10293800  |
| C | 0.06692800  | 4.50768500  | -1.07825100 |
| H | -1.57144200 | 3.35762900  | -1.82215300 |
| C | 1.68562200  | 3.35678400  | 0.27722100  |
| H | 1.31364700  | 1.26941900  | 0.61303000  |
| C | 1.24466100  | 4.54011700  | -0.31892400 |
| H | -0.30700500 | 5.42348000  | -1.53056100 |
| H | 2.58503200  | 3.35460400  | 0.88952300  |
| H | 1.79197900  | 5.46838400  | -0.18584000 |
| C | 2.12150900  | -3.50324800 | 3.88140600  |
| H | 2.93797200  | -4.06806200 | 3.41521400  |
| H | 2.57348300  | -2.64349500 | 4.39016600  |
| H | 1.66040000  | -4.14106600 | 4.64001700  |
| C | -1.15647400 | -4.15807500 | 3.58481300  |
| H | -2.00346000 | -3.55073300 | 3.92442400  |
| H | -1.57068900 | -5.00768300 | 3.02959500  |
| H | -0.64027100 | -4.54734300 | 4.46628700  |
| C | 5.42780400  | -0.21757300 | -3.12515100 |
| H | 5.74867300  | -1.11083600 | -2.57643300 |
| H | 6.23199300  | 0.52481800  | -3.06487200 |
| H | 5.30923200  | -0.49972300 | -4.17764800 |
| C | 4.12138700  | 0.33546700  | -2.54894200 |
| H | 4.26554100  | 0.62239100  | -1.50116100 |
| H | 3.82864100  | 1.24584600  | -3.08653300 |
| C | 2.97645100  | -0.70638900 | -2.63832700 |
| H | 3.28400100  | -1.60774100 | -2.10046300 |
| H | 2.80386200  | -0.98256000 | -3.68162100 |
| C | 1.75636600  | -0.10360200 | -2.03025200 |
| H | 1.14627600  | 0.56379400  | -2.62584900 |
| H | 1.88719900  | 0.19879500  | -0.99202100 |
| I | 0.03476100  | -2.30356300 | -2.91129900 |

**TS17-OA**

|    |             |             |             |
|----|-------------|-------------|-------------|
| Cu | 0.76156300  | -0.42982400 | -1.63032900 |
| C  | 0.45543400  | -1.77934300 | -0.16336000 |
| N  | -0.45100200 | -2.77714100 | -0.02922900 |
| C  | -0.32100200 | -3.45086200 | 1.19631300  |
| C  | 0.69978100  | -2.83669900 | 1.85828000  |
| N  | 1.15888500  | -1.82551400 | 1.00266300  |
| H  | 3.99576400  | -3.24152900 | 1.51792700  |
| C  | -3.54274400 | -3.73491600 | -2.73187100 |
| C  | -2.24386000 | -4.20065100 | -2.94456600 |

|   |             |             |             |
|---|-------------|-------------|-------------|
| H | -2.03435700 | -4.82106500 | -3.81135900 |
| C | -1.19612400 | -3.87353000 | -2.08114300 |
| C | -3.05583900 | -1.59478100 | 0.39286700  |
| H | -2.40499500 | -1.76859400 | 1.25392000  |
| C | 0.20677000  | -4.36105100 | -2.33284700 |
| H | 0.85955600  | -3.53039900 | -2.62452500 |
| H | 2.39799300  | 2.33701000  | 2.43683400  |
| C | 4.07491700  | 1.09390300  | 1.90165900  |
| C | 4.45490700  | -0.17034600 | 1.44719100  |
| H | 5.50989900  | -0.39024500 | 1.30374300  |
| H | -4.79214800 | -2.52692600 | -1.46599200 |
| C | 3.51545900  | -1.16687300 | 1.15555800  |
| C | 0.27373700  | 0.67814600  | 2.03099700  |
| C | -2.77154400 | -2.54231800 | -0.74709700 |
| H | -0.15762700 | -0.01657900 | 2.76213600  |
| C | 2.16277200  | -0.85641900 | 1.33176900  |
| C | 1.73797500  | 0.39620400  | 1.80724200  |
| C | 2.71055400  | 1.35958600  | 2.07655100  |
| H | 0.64741000  | -4.81287800 | -1.43638200 |
| H | 0.22011700  | -5.10276500 | -3.13620600 |
| H | -4.09499200 | -1.69094700 | 0.72448500  |
| H | -2.91032400 | -0.55564300 | 0.07560200  |
| H | 4.95377200  | -2.47730400 | 0.24089500  |
| H | 3.27643300  | -2.92704200 | -0.07209600 |
| H | 0.12506900  | 1.69622600  | 2.40125000  |
| H | -0.29932100 | 0.56020200  | 1.10771200  |
| C | -3.78756100 | -2.90728700 | -1.63285800 |
| C | 3.95575900  | -2.52824900 | 0.68349400  |
| C | -1.48869100 | -3.05842300 | -0.98018800 |
| C | -4.65592100 | -4.07298400 | -3.69103500 |
| H | -5.56864400 | -4.36761100 | -3.16064200 |
| H | -4.90724400 | -3.20483300 | -4.31339200 |
| H | -4.37274800 | -4.88905700 | -4.36269800 |
| C | 5.10503300  | 2.15007500  | 2.21915400  |
| H | 4.85056200  | 3.10776600  | 1.75244700  |
| H | 5.17283100  | 2.32330900  | 3.30070100  |
| H | 6.09843400  | 1.85722800  | 1.86669000  |
| C | 1.29305600  | -3.07063200 | 3.20483400  |
| H | 2.34053500  | -3.38696200 | 3.13968100  |
| H | 1.26772600  | -2.15921000 | 3.81371800  |
| H | 0.73781200  | -3.84857300 | 3.73529200  |
| C | -1.18865500 | -4.60536500 | 1.56359000  |
| H | -2.24482500 | -4.31793200 | 1.61831500  |
| H | -1.11209700 | -5.41000000 | 0.82311600  |

|   |             |             |             |
|---|-------------|-------------|-------------|
| H | -0.89282000 | -5.00793200 | 2.53596200  |
| C | 5.45830700  | 3.57931600  | -1.27025600 |
| H | 6.04180400  | 2.94404800  | -0.59346900 |
| H | 5.53233800  | 4.61223400  | -0.91079700 |
| H | 5.93214600  | 3.53330500  | -2.25782900 |
| C | 3.99949800  | 3.11934000  | -1.33896700 |
| H | 3.52610000  | 3.21251800  | -0.35382600 |
| H | 3.42998900  | 3.76879000  | -2.01374600 |
| C | 3.89310600  | 1.65010200  | -1.80954500 |
| H | 4.39762800  | 1.00942500  | -1.08062500 |
| H | 4.40931000  | 1.53411400  | -2.76751400 |
| C | 2.44540800  | 1.27417300  | -1.93169900 |
| H | 1.90521400  | 1.67551800  | -2.78113600 |
| H | 1.90769500  | 1.33868300  | -0.98883800 |
| I | 3.05046100  | -1.29501400 | -2.79584600 |
| B | -3.19378200 | 0.96248000  | -2.31333000 |
| O | -4.32717300 | 0.90598600  | -3.10580000 |
| C | -5.42445300 | 1.43975600  | -2.32539400 |
| C | -4.67817800 | 2.32798700  | -1.26741100 |
| O | -3.42388500 | 1.62630900  | -1.11677800 |
| C | -0.82201800 | 0.95296600  | -1.76758500 |
| H | -1.15372700 | 0.87184000  | -0.73267100 |
| C | -0.39344600 | 2.32100600  | -2.05415700 |
| C | -0.48937100 | 2.89924700  | -3.34120700 |
| C | -0.02272300 | 4.18664400  | -3.58941900 |
| C | 0.55736800  | 4.95052300  | -2.56957100 |
| C | 0.66405000  | 4.39823200  | -1.29296700 |
| C | 0.20600700  | 3.10558000  | -1.04101700 |
| H | -0.95005800 | 2.32849500  | -4.14088400 |
| H | -0.11980600 | 4.60443300  | -4.58862700 |
| H | 0.91408200  | 5.95697000  | -2.76834800 |
| H | 1.10555800  | 4.97603000  | -0.48446400 |
| H | 0.27035000  | 2.70050500  | -0.03427800 |
| C | -5.35639700 | 2.41684800  | 0.09443800  |
| H | -5.46562600 | 1.43102600  | 0.55212200  |
| H | -6.34782700 | 2.87530300  | 0.00635600  |
| H | -4.75304900 | 3.03716100  | 0.76463700  |
| C | -4.33868000 | 3.72838900  | -1.79058600 |
| H | -3.84875200 | 3.67478700  | -2.76756800 |
| H | -3.63855600 | 4.20158600  | -1.09609000 |
| H | -5.23007900 | 4.35843600  | -1.87663100 |
| C | -6.35993800 | 2.19825800  | -3.25925400 |
| H | -7.15813300 | 2.68959700  | -2.69143100 |
| H | -6.82263600 | 1.50160700  | -3.96560800 |

|   |             |             |             |
|---|-------------|-------------|-------------|
| H | -5.82145400 | 2.95406600  | -3.83463500 |
| C | -6.15070600 | 0.24734900  | -1.69438500 |
| H | -7.04807800 | 0.56079800  | -1.15122100 |
| H | -5.49252900 | -0.28648300 | -1.00319400 |
| H | -6.44879200 | -0.44583100 | -2.48704300 |
| N | -1.90652400 | 0.45329600  | -2.63350600 |
| C | -1.62768000 | -0.34469100 | -3.76311000 |
| C | -0.32407300 | -0.43124500 | -4.27902000 |
| C | -2.63767800 | -1.08459500 | -4.40602300 |
| C | -0.02299400 | -1.28098900 | -5.34338000 |
| H | 0.46052100  | 0.18664400  | -3.86173500 |
| C | -2.33496700 | -1.90265200 | -5.48912600 |
| H | -3.65437100 | -1.02122100 | -4.04571200 |
| C | -1.02475800 | -2.02761900 | -5.95858600 |
| H | 1.00569800  | -1.34222200 | -5.68602200 |
| H | -3.13554700 | -2.46685200 | -5.96140500 |
| H | -0.79532200 | -2.68258300 | -6.79422800 |

**IM1-<sup>n</sup>Bu**

|    |             |             |             |
|----|-------------|-------------|-------------|
| Cu | -0.09519900 | -1.66567500 | -1.56050900 |
| B  | -3.86177000 | 0.31565200  | -1.59991000 |
| O  | -4.39588300 | 0.16238100  | -0.35037200 |
| C  | -5.76472000 | 0.65471800  | -0.41175700 |
| C  | -5.70414500 | 1.64685400  | -1.62839700 |
| O  | -4.63575400 | 1.07428600  | -2.43795800 |
| C  | -2.50445800 | -0.34256900 | -2.08796700 |
| H  | -2.17115000 | 0.24308500  | -2.96329400 |
| C  | -2.75707800 | -1.76476600 | -2.56707100 |
| C  | -3.53398200 | -2.65524600 | -1.81136400 |
| C  | -3.70356400 | -3.97387400 | -2.22842600 |
| C  | -3.09518700 | -4.42483400 | -3.40308800 |
| C  | -2.31397900 | -3.54963100 | -4.15790300 |
| C  | -2.15153000 | -2.22639500 | -3.74240700 |
| H  | -3.98706000 | -2.31557700 | -0.88812800 |
| H  | -4.30043600 | -4.65193700 | -1.62550400 |
| H  | -3.22374100 | -5.45517100 | -3.72333800 |
| H  | -1.82204700 | -3.89406300 | -5.06234300 |
| H  | -1.53701000 | -1.54793900 | -4.32722300 |
| C  | -6.97090300 | 1.71110100  | -2.47127300 |
| H  | -7.81387200 | 2.07764300  | -1.87475800 |
| H  | -6.82112300 | 2.40031200  | -3.30798900 |
| H  | -7.22972500 | 0.73234200  | -2.88008900 |
| C  | -5.24615300 | 3.05378100  | -1.23297500 |
| H  | -4.33657600 | 3.01615300  | -0.62640900 |



|   |             |             |             |
|---|-------------|-------------|-------------|
| H | -5.02750000 | 3.62242700  | -2.14202300 |
| H | -6.02126800 | 3.58540100  | -0.67204300 |
| C | -6.11392200 | 1.30038300  | 0.92331300  |
| H | -7.09896300 | 1.77786400  | 0.87528400  |
| H | -6.14795800 | 0.53644100  | 1.70573300  |
| H | -5.37338100 | 2.04991600  | 1.21001400  |
| C | -6.65350200 | -0.56669300 | -0.66540000 |
| H | -6.47143500 | -1.30258700 | 0.12331400  |
| H | -7.71523700 | -0.30025100 | -0.65861600 |
| H | -6.41628200 | -1.03641600 | -1.62478800 |
| N | -1.48705900 | -0.37619900 | -1.03172000 |
| C | -1.10702700 | 0.83410900  | -0.48535300 |
| C | -1.54209000 | 2.09587800  | -0.95948000 |
| C | -0.23145200 | 0.82264200  | 0.63022400  |
| C | -1.14157000 | 3.27248800  | -0.32672300 |
| H | -2.19059500 | 2.16170200  | -1.82536900 |
| C | 0.17341100  | 2.00181900  | 1.24074600  |
| H | 0.12336400  | -0.13073200 | 1.00445400  |
| C | -0.27967500 | 3.23997000  | 0.77040000  |
| H | -1.49672700 | 4.22584500  | -0.70980600 |
| H | 0.84558600  | 1.95254300  | 2.09317000  |
| H | 0.03508400  | 4.16110400  | 1.25120800  |
| C | 3.28045100  | 2.39184900  | -1.42384300 |
| H | 3.02696300  | 2.33832300  | -0.35837800 |
| H | 3.49256000  | 3.43938400  | -1.66657500 |
| H | 4.20080900  | 1.81664100  | -1.58180800 |
| C | 2.13070900  | 1.84637800  | -2.27378400 |
| H | 1.22592800  | 2.43744800  | -2.08934500 |
| H | 2.36738100  | 1.94472700  | -3.34165800 |
| C | 1.82848100  | 0.36976000  | -1.94692000 |
| H | 1.62801500  | 0.32794300  | -0.86659300 |
| H | 2.70530300  | -0.26059400 | -2.13009200 |
| C | 0.65180000  | -0.15965600 | -2.72749300 |
| H | 0.89450100  | -0.65135700 | -3.66599100 |
| H | -0.16540400 | 0.54961800  | -2.83486200 |
| I | 1.67622800  | -3.29542700 | -2.61986300 |
| C | 2.43731100  | -1.54677900 | 3.49431600  |
| C | 2.81355900  | -1.71132200 | 2.15931400  |
| C | 1.90670600  | -2.22526900 | 1.23413200  |
| C | 0.60939800  | -2.58631100 | 1.63594900  |
| C | 0.24318000  | -2.43028700 | 2.98020400  |
| C | 1.15300500  | -1.91069900 | 3.90222400  |
| H | 3.81197800  | -1.43351800 | 1.83386400  |
| H | 2.20132000  | -2.34493800 | 0.19574000  |

|   |             |             |             |
|---|-------------|-------------|-------------|
| H | -0.75670500 | -2.69938800 | 3.30229000  |
| H | 0.85555000  | -1.78910800 | 4.94010600  |
| C | 0.05979700  | -7.74687900 | 0.00150600  |
| C | 0.45893700  | -7.09400200 | 1.16949200  |
| C | 0.30200900  | -5.71286600 | 1.28730600  |
| C | -0.24961400 | -4.97754600 | 0.23115000  |
| C | -0.63538800 | -5.63391000 | -0.94588700 |
| C | -0.48956400 | -7.01588300 | -1.05391200 |
| H | 0.89262300  | -7.65958300 | 1.98949700  |
| H | 0.60910900  | -5.20644200 | 2.19697100  |
| H | -1.03806700 | -5.06043900 | -1.77314000 |
| H | -0.78906400 | -7.51838500 | -1.96924400 |
| C | -4.76764600 | -2.83743100 | 2.23960500  |
| C | -3.94422600 | -1.71624000 | 2.12957400  |
| C | -2.67131500 | -1.82852300 | 1.57382800  |
| C | -2.19473100 | -3.07689000 | 1.14445600  |
| C | -3.02392000 | -4.20228200 | 1.26408400  |
| C | -4.30514400 | -4.08030800 | 1.80069700  |
| H | -4.29482100 | -0.74317200 | 2.45634000  |
| H | -2.05969800 | -0.94271300 | 1.46378300  |
| H | -2.66997600 | -5.17120100 | 0.93124400  |
| H | -4.93799200 | -4.95950400 | 1.88553000  |
| P | -0.55225400 | -3.18072300 | 0.34225300  |
| H | -5.76270000 | -2.74539700 | 2.66677200  |
| H | 0.18368400  | -8.82254200 | -0.08845300 |
| H | 3.14150400  | -1.13708800 | 4.21299600  |

**IM2-"Bu**

|   |             |            |             |
|---|-------------|------------|-------------|
| C | 5.79519100  | 6.03759100 | -1.55203700 |
| C | 5.73402500  | 5.37837400 | -2.77953900 |
| C | 6.21565300  | 4.07355000 | -2.90008800 |
| C | 6.76577100  | 3.42150900 | -1.79106200 |
| C | 6.80270900  | 4.08152000 | -0.55192400 |
| C | 6.32634700  | 5.38559300 | -0.43542700 |
| H | 5.29501900  | 5.86953400 | -3.64309500 |
| H | 6.12055900  | 3.54313500 | -3.83864600 |
| H | 7.19928700  | 3.56867000 | 0.31943800  |
| H | 6.36057100  | 5.88983100 | 0.52631500  |
| C | 12.01696300 | 2.01565300 | -1.42309600 |
| C | 11.24230900 | 3.16489700 | -1.26570000 |
| C | 9.85505000  | 3.10092400 | -1.40353000 |
| C | 9.22816200  | 1.88702900 | -1.71317500 |
| C | 10.01607900 | 0.74117900 | -1.90558300 |
| C | 11.39873800 | 0.80516400 | -1.74184700 |

|    |             |             |             |
|----|-------------|-------------|-------------|
| H  | 11.71558700 | 4.11441900  | -1.03116100 |
| H  | 9.26186600  | 3.99942100  | -1.27789000 |
| H  | 9.55158400  | -0.18970500 | -2.21539800 |
| H  | 12.00061900 | -0.08711500 | -1.88320200 |
| C  | 5.68534400  | -0.44060600 | 1.74623200  |
| C  | 4.85415600  | 0.17921300  | 0.80810400  |
| C  | 5.40485800  | 0.85886800  | -0.27442700 |
| C  | 6.80010500  | 0.93151700  | -0.42590500 |
| C  | 7.62964100  | 0.31777100  | 0.51836200  |
| C  | 7.07077800  | -0.36828800 | 1.59983800  |
| H  | 3.77464400  | 0.12094100  | 0.91280900  |
| H  | 4.75781100  | 1.31001400  | -1.02214400 |
| H  | 8.70804200  | 0.36876300  | 0.40909400  |
| H  | 7.72153900  | -0.84326500 | 2.32906800  |
| P  | 7.41875300  | 1.71936100  | -1.96268300 |
| Cu | 6.81727400  | 0.31834400  | -3.82499600 |
| B  | 9.35692600  | -2.28218200 | -5.21557200 |
| O  | 9.79654400  | -3.50894500 | -5.65057800 |
| C  | 10.47721600 | -4.12668100 | -4.52685900 |
| C  | 10.94710600 | -2.87671300 | -3.69860600 |
| O  | 9.92315400  | -1.89265400 | -4.02018900 |
| C  | 12.28100900 | -2.30383800 | -4.18396100 |
| H  | 12.43559400 | -1.32227100 | -3.72711100 |
| H  | 13.12031400 | -2.95030000 | -3.90995000 |
| H  | 12.28149000 | -2.17686200 | -5.27099400 |
| C  | 10.96100800 | -3.08428300 | -2.18925600 |
| H  | 11.64781800 | -3.89396100 | -1.91960000 |
| H  | 11.29750600 | -2.17413900 | -1.68515800 |
| H  | 9.96572500  | -3.32873300 | -1.81253200 |
| C  | 11.60229000 | -5.00367300 | -5.06141100 |
| H  | 12.18959500 | -5.42283800 | -4.23694500 |
| H  | 11.17924900 | -5.83370900 | -5.63512700 |
| H  | 12.26943900 | -4.44316500 | -5.71917600 |
| C  | 9.43678900  | -4.97947200 | -3.79291000 |
| H  | 9.00872100  | -5.69581500 | -4.50026100 |
| H  | 9.88318100  | -5.53715400 | -2.96383300 |
| H  | 8.62174500  | -4.36440800 | -3.39857400 |
| C  | 7.88953300  | -0.24988600 | -5.61831700 |
| H  | 6.95535200  | -0.04757500 | -6.13650400 |
| C  | 8.72385600  | 0.93394400  | -5.41981600 |
| C  | 8.06686500  | 2.19186800  | -5.41511100 |
| C  | 8.77408100  | 3.36359900  | -5.14358600 |
| C  | 10.14476100 | 3.31466700  | -4.90072300 |
| C  | 10.81271500 | 2.08509800  | -4.95277500 |

|   |             |             |              |
|---|-------------|-------------|--------------|
| C | 10.11845400 | 0.91059800  | -5.20044800  |
| H | 7.00514000  | 2.23555900  | -5.64224400  |
| H | 8.24711200  | 4.31207900  | -5.12372300  |
| H | 10.69529400 | 4.22414700  | -4.68145400  |
| H | 11.88265400 | 2.04390400  | -4.77442900  |
| H | 10.64800000 | -0.03013800 | -5.20957100  |
| N | 8.38287300  | -1.52240400 | -5.94604700  |
| C | 7.69614000  | -2.16084100 | -7.03792000  |
| C | 7.62072500  | -1.50230400 | -8.26922800  |
| C | 7.08314300  | -3.40679300 | -6.87620200  |
| C | 6.93118800  | -2.08503700 | -9.33193100  |
| H | 8.10905600  | -0.53961100 | -8.38757400  |
| C | 6.40663800  | -3.98992800 | -7.94528100  |
| H | 7.12972300  | -3.90454800 | -5.91486100  |
| C | 6.32503100  | -3.33182900 | -9.17442000  |
| H | 6.87360500  | -1.56484200 | -10.28352300 |
| H | 5.92732300  | -4.95537300 | -7.81157200  |
| H | 5.78709600  | -3.78564100 | -10.00139300 |
| H | 5.25332700  | -0.97728000 | 2.58616500   |
| H | 13.09631600 | 2.06384000  | -1.30834700  |
| H | 5.41628300  | 7.05160200  | -1.45878600  |
| C | 4.81543100  | -3.53930300 | -0.71047700  |
| H | 5.37230900  | -3.13015700 | 0.14073100   |
| H | 4.61816400  | -4.59966900 | -0.51358500  |
| H | 3.85189600  | -3.01800400 | -0.75211800  |
| C | 5.59354400  | -3.34553600 | -2.01532600  |
| H | 6.54173100  | -3.90068400 | -1.96837400  |
| H | 5.02830300  | -3.76510300 | -2.85793800  |
| C | 5.88916500  | -1.85487900 | -2.29022700  |
| H | 6.42899000  | -1.45113400 | -1.42810200  |
| H | 4.93947200  | -1.31201900 | -2.35570000  |
| C | 6.69492400  | -1.66495000 | -3.55348300  |
| H | 6.19587700  | -2.02317200 | -4.45356700  |
| H | 7.71595800  | -2.02684300 | -3.47541500  |
| I | 4.33065600  | 1.16971400  | -4.51325700  |

**IM3-<sup>n</sup>Bu**

|    |             |             |             |
|----|-------------|-------------|-------------|
| Cu | -0.09881600 | -0.58014100 | -0.47026000 |
| C  | 0.51000300  | -1.78426700 | 1.00590800  |
| N  | -0.45314900 | -2.36981800 | 1.76758600  |
| C  | 0.08934100  | -3.11627100 | 2.81835300  |
| C  | 1.44241200  | -3.00250100 | 2.70236400  |
| N  | 1.66961200  | -2.18007000 | 1.58710400  |
| B  | -1.47906700 | 1.19563200  | -3.34748500 |

|   |             |             |             |
|---|-------------|-------------|-------------|
| O | -0.13147400 | 1.42104200  | -3.47436500 |
| C | 0.09960200  | 1.94213900  | -4.81082500 |
| C | -1.17485800 | 1.44802300  | -5.58440700 |
| O | -2.16655600 | 1.37060600  | -4.51942200 |
| C | -2.12315400 | 0.67292500  | -1.99836300 |
| H | -2.11694400 | -0.41528200 | -2.16302300 |
| C | -3.59274500 | 1.01068800  | -1.75899500 |
| C | -4.06357000 | 1.54268500  | -0.55373400 |
| C | -5.42341400 | 1.80124500  | -0.36683500 |
| C | -6.34132600 | 1.52509900  | -1.37869700 |
| C | -5.88400100 | 0.97708300  | -2.57982400 |
| C | -4.52686300 | 0.71945800  | -2.76609300 |
| H | -3.36802200 | 1.75166900  | 0.24839000  |
| H | -5.76216100 | 2.22006200  | 0.57763400  |
| H | -7.39896100 | 1.72758400  | -1.23371300 |
| H | -6.58627700 | 0.74775600  | -3.37707300 |
| H | -4.18054200 | 0.30207000  | -3.70494800 |
| H | 2.42589600  | -4.51371700 | 0.41420800  |
| C | -4.52343100 | -2.05937100 | 0.68809000  |
| C | -3.76890400 | -3.18286400 | 0.33383200  |
| H | -4.22488500 | -3.96322700 | -0.26955500 |
| C | -2.43399200 | -3.32347800 | 0.71270000  |
| C | -1.97678200 | -0.05246600 | 2.68976200  |
| H | -1.02039700 | -0.34117000 | 3.13391200  |
| C | -1.63836100 | -4.54124900 | 0.32349000  |
| H | -1.30278800 | -5.10774300 | 1.20114800  |
| H | 5.42546500  | 0.44568000  | 1.55037600  |
| C | 5.54792900  | -1.24390100 | 0.22167000  |
| C | 4.87642500  | -2.37482000 | -0.25270500 |
| H | 5.36222800  | -3.01577700 | -0.98417400 |
| H | -4.50716600 | -0.21228100 | 1.78233300  |
| C | 3.58512800  | -2.69937600 | 0.17445400  |
| C | 2.94484700  | 0.15315400  | 2.65532800  |
| C | -2.58759700 | -1.16261800 | 1.87359400  |
| H | 3.58248300  | 0.99685100  | 2.93260000  |
| C | 2.98228900  | -1.85216600 | 1.11351000  |
| C | 3.62643700  | -0.72221000 | 1.63321900  |
| C | 4.91156000  | -0.43299100 | 1.16823000  |
| H | -2.24075400 | -5.20689600 | -0.29942400 |
| H | -0.75762200 | -4.25636600 | -0.25947000 |
| H | -2.65329000 | 0.24955700  | 3.49679500  |
| H | -1.80012700 | 0.82719900  | 2.06263200  |
| H | 3.51056900  | -4.50690400 | -0.99075400 |
| H | 2.00534700  | -3.56741500 | -1.01225400 |

|   |             |             |             |
|---|-------------|-------------|-------------|
| H | 1.99857300  | 0.55249400  | 2.27281900  |
| H | 2.70201200  | -0.40439200 | 3.56778400  |
| C | -3.92641100 | -1.07984900 | 1.48307100  |
| C | 2.84601700  | -3.88818500 | -0.38167700 |
| C | -1.85569500 | -2.28148700 | 1.45684000  |
| C | -5.93551400 | -1.88646000 | 0.19049900  |
| H | -6.56626400 | -1.38949900 | 0.93515500  |
| H | -5.94459200 | -1.25922900 | -0.70854900 |
| H | -6.39183300 | -2.84867500 | -0.06341200 |
| C | 6.91275600  | -0.88123300 | -0.30899100 |
| H | 6.82399300  | -0.26063200 | -1.21002500 |
| H | 7.49205600  | -0.31319700 | 0.42593200  |
| H | 7.48584400  | -1.77274100 | -0.58334700 |
| C | -1.68682200 | 2.40276800  | -6.65500800 |
| H | -0.93292000 | 2.54412200  | -7.43768100 |
| H | -2.58519300 | 1.98525600  | -7.11989400 |
| H | -1.94349800 | 3.37804800  | -6.23562700 |
| C | -1.02871000 | 0.02977200  | -6.14321600 |
| H | -0.68247500 | -0.66790700 | -5.37371200 |
| H | -2.00777600 | -0.31320000 | -6.49129300 |
| H | -0.33372600 | 0.00211400  | -6.98888700 |
| C | 1.41586500  | 1.38072500  | -5.33474400 |
| H | 1.57664800  | 1.68410600  | -6.37543400 |
| H | 2.24762000  | 1.76625000  | -4.73738900 |
| H | 1.43096200  | 0.29063700  | -5.27969800 |
| C | 0.18024000  | 3.46529100  | -4.67562200 |
| H | 0.95723700  | 3.71451800  | -3.94683200 |
| H | 0.42871300  | 3.94206300  | -5.62927000 |
| H | -0.76438800 | 3.87973300  | -4.31173900 |
| N | -1.26155400 | 0.88333800  | -0.82478700 |
| C | -0.98850600 | 2.19119600  | -0.46751400 |
| C | -1.47446900 | 3.32319900  | -1.16791400 |
| C | -0.21065400 | 2.44125300  | 0.69315600  |
| C | -1.20232600 | 4.61352600  | -0.72353400 |
| H | -2.10180800 | 3.19464400  | -2.04077100 |
| C | 0.05848600  | 3.73111600  | 1.12645600  |
| H | 0.17091200  | 1.58913400  | 1.24589500  |
| C | -0.43471400 | 4.83456700  | 0.42123200  |
| H | -1.60090400 | 5.45726300  | -1.28064800 |
| H | 0.65641900  | 3.87880700  | 2.02211500  |
| H | -0.22606700 | 5.84481100  | 0.75996200  |
| C | 2.56097900  | -3.57609000 | 3.50267400  |
| H | 3.19624900  | -4.22912300 | 2.89287400  |
| H | 3.20720200  | -2.79376500 | 3.91738800  |

|   |             |             |             |
|---|-------------|-------------|-------------|
| H | 2.16608300  | -4.16701300 | 4.33293700  |
| C | -0.76534900 | -3.81037600 | 3.82269100  |
| H | -1.44999300 | -3.10621800 | 4.30903000  |
| H | -1.37896700 | -4.59310000 | 3.36391400  |
| H | -0.14471300 | -4.27278300 | 4.59453100  |
| C | 4.56385300  | -0.09910600 | -3.31987500 |
| H | 4.86373000  | -1.08353200 | -2.94345100 |
| H | 5.47264800  | 0.47534100  | -3.53660300 |
| H | 4.02826500  | -0.25336100 | -4.26335400 |
| C | 3.68011500  | 0.62179100  | -2.29864000 |
| H | 4.23559400  | 0.77350800  | -1.36577300 |
| H | 3.40784400  | 1.61764800  | -2.67148600 |
| C | 2.38932300  | -0.18644600 | -2.00619000 |
| H | 2.67011000  | -1.17990700 | -1.65448600 |
| H | 1.81945300  | -0.31222600 | -2.92804700 |
| C | 1.56192500  | 0.54228600  | -1.00262300 |
| H | 1.10275200  | 1.45156300  | -1.36879700 |
| H | 1.97678600  | 0.63000700  | -0.00092500 |
| I | -0.40077200 | -2.53069500 | -2.60064700 |

#### IM4-"Bu

|    |             |             |             |
|----|-------------|-------------|-------------|
| Cu | 1.11108000  | -0.25007400 | -1.66187300 |
| C  | 0.29278700  | -1.65788200 | -0.34440700 |
| N  | -0.49686500 | -2.76183800 | -0.26569100 |
| C  | -0.30249800 | -3.46177600 | 0.94061400  |
| C  | 0.62564800  | -2.76069200 | 1.64641400  |
| N  | 0.96831800  | -1.66854300 | 0.84349500  |
| H  | 4.39674700  | -2.42613900 | 1.55172600  |
| C  | -3.82345700 | -3.92174900 | -2.60525600 |
| C  | -2.54941300 | -4.39984900 | -2.90727400 |
| H  | -2.42254100 | -5.09816200 | -3.73076000 |
| C  | -1.41643300 | -4.01152300 | -2.18198800 |
| C  | -3.05139900 | -1.67975900 | 0.38992300  |
| H  | -2.46914400 | -1.99250800 | 1.26263300  |
| C  | -0.06518000 | -4.55370000 | -2.54954800 |
| H  | 0.45204400  | -3.86096200 | -3.22188100 |
| H  | 1.55951400  | 2.57045800  | 2.46083100  |
| C  | 3.40848000  | 1.62289800  | 1.88735300  |
| C  | 3.98120200  | 0.43445500  | 1.44019200  |
| H  | 5.05978400  | 0.37638000  | 1.31612000  |
| H  | -4.95525000 | -2.68308600 | -1.25941300 |
| C  | 3.20893800  | -0.69195500 | 1.12166000  |
| C  | -0.27098700 | 0.61238600  | 2.06975200  |
| C  | -2.86657200 | -2.61777000 | -0.77724700 |

|   |             |             |             |
|---|-------------|-------------|-------------|
| H | -0.49011900 | 0.09030700  | 3.01094900  |
| C | 1.81966600  | -0.58547800 | 1.25065400  |
| C | 1.20786300  | 0.57159900  | 1.77437300  |
| C | 2.01914700  | 1.66466500  | 2.07136400  |
| H | 0.58577800  | -4.67069900 | -1.67919900 |
| H | -0.16105000 | -5.52012100 | -3.05413900 |
| H | -4.10452100 | -1.63710100 | 0.68378900  |
| H | -2.74088100 | -0.66116700 | 0.13714400  |
| H | 4.63490400  | -1.77113600 | -0.07740400 |
| H | 3.18202700  | -2.68622600 | 0.27570200  |
| H | -0.62234000 | 1.64269500  | 2.17347200  |
| H | -0.86404500 | 0.12679400  | 1.29384900  |
| C | -3.96492700 | -3.04032800 | -1.52730600 |
| C | 3.88578200  | -1.96755900 | 0.69412300  |
| C | -1.59538700 | -3.10456900 | -1.13158900 |
| C | -5.02029500 | -4.31929900 | -3.43341900 |
| H | -5.92100400 | -4.41698000 | -2.81765600 |
| H | -5.23182500 | -3.56281100 | -4.20070100 |
| H | -4.85310700 | -5.27042100 | -3.94874100 |
| C | 4.25365600  | 2.83801900  | 2.17937600  |
| H | 3.96149800  | 3.68089100  | 1.54154100  |
| H | 4.13885600  | 3.16409400  | 3.22028900  |
| H | 5.31415300  | 2.63791400  | 2.00144200  |
| C | 1.23868500  | -2.98521000 | 2.98549000  |
| H | 2.31641700  | -3.16983700 | 2.90964300  |
| H | 1.10276400  | -2.11322700 | 3.63617100  |
| H | 0.78078700  | -3.84888200 | 3.47443600  |
| C | -1.03572100 | -4.72057900 | 1.25487300  |
| H | -2.11980000 | -4.56211500 | 1.28194300  |
| H | -0.84128200 | -5.49350600 | 0.50260700  |
| H | -0.72097000 | -5.10612800 | 2.22816600  |
| C | 6.09430000  | 2.20280100  | -1.78791000 |
| H | 6.39068600  | 1.48764900  | -1.01018100 |
| H | 6.63592300  | 3.13920200  | -1.60879800 |
| H | 6.42883400  | 1.79800800  | -2.75024300 |
| C | 4.57824700  | 2.41743500  | -1.77762600 |
| H | 4.27139900  | 2.82792900  | -0.80653700 |
| H | 4.29867700  | 3.16594000  | -2.53126200 |
| C | 3.80724100  | 1.10645600  | -2.03647500 |
| H | 4.13772800  | 0.36380500  | -1.30525300 |
| H | 4.06723500  | 0.70722700  | -3.02079300 |
| C | 2.31883200  | 1.35273700  | -1.92849900 |
| H | 1.92285300  | 1.94339300  | -2.75281500 |
| H | 2.06394700  | 1.83202300  | -0.98131300 |



|   |             |             |             |
|---|-------------|-------------|-------------|
| I | 2.73580000  | -2.06296700 | -2.81614100 |
| B | -2.82871700 | 0.90785200  | -2.11792500 |
| O | -3.90253600 | 0.86197200  | -2.97873900 |
| C | -5.05109600 | 1.38300200  | -2.26227100 |
| C | -4.38222400 | 2.20847000  | -1.10009800 |
| O | -3.13094900 | 1.50518700  | -0.90640300 |
| C | -0.47730700 | 1.12031800  | -1.59471900 |
| H | -0.69323200 | 0.94301200  | -0.54690700 |
| C | -0.29051100 | 2.56241900  | -1.83662200 |
| C | -0.60289400 | 3.16710800  | -3.06830200 |
| C | -0.44799200 | 4.53963500  | -3.24891700 |
| C | 0.02191900  | 5.34384100  | -2.20715300 |
| C | 0.33337500  | 4.75856500  | -0.97822200 |
| C | 0.17926400  | 3.38653500  | -0.79719300 |
| H | -0.98801100 | 2.55689900  | -3.87773200 |
| H | -0.70154200 | 4.98536300  | -4.20706600 |
| H | 0.13839800  | 6.41425400  | -2.35055700 |
| H | 0.69075100  | 5.37371400  | -0.15644900 |
| H | 0.41093400  | 2.93840900  | 0.16414200  |
| C | -5.14868400 | 2.20757300  | 0.21682500  |
| H | -5.28465400 | 1.19433000  | 0.60123200  |
| H | -6.13326400 | 2.67238500  | 0.09413300  |
| H | -4.59231000 | 2.78233400  | 0.96391400  |
| C | -4.01909900 | 3.64074300  | -1.50751500 |
| H | -3.46830500 | 3.65564700  | -2.45205800 |
| H | -3.36542300 | 4.06886600  | -0.74208300 |
| H | -4.90814700 | 4.27205000  | -1.60616300 |
| C | -5.88614800 | 2.20947900  | -3.23373000 |
| H | -6.72135300 | 2.69179500  | -2.71351800 |
| H | -6.29748500 | 1.55886700  | -4.01173400 |
| H | -5.28347200 | 2.97936800  | -3.71945800 |
| C | -5.85482200 | 0.18151100  | -1.75973900 |
| H | -6.79258000 | 0.49256200  | -1.28797100 |
| H | -5.27700200 | -0.40028400 | -1.03833800 |
| H | -6.08923100 | -0.46750100 | -2.60882600 |
| N | -1.50133600 | 0.48740800  | -2.41954900 |
| C | -1.18626200 | -0.21270700 | -3.61537000 |
| C | -0.03676000 | 0.07266900  | -4.36437600 |
| C | -2.03949300 | -1.23630000 | -4.05240900 |
| C | 0.26438100  | -0.66968900 | -5.50678400 |
| H | 0.63632100  | 0.85948400  | -4.05355400 |
| C | -1.74384000 | -1.95550200 | -5.20502800 |
| H | -2.92196300 | -1.47346500 | -3.47383400 |
| C | -0.58568000 | -1.68421600 | -5.93818800 |

|   |             |             |             |
|---|-------------|-------------|-------------|
| H | 1.18023500  | -0.45335600 | -6.04781400 |
| H | -2.41460300 | -2.75168400 | -5.51617800 |
| H | -0.34656300 | -2.26264000 | -6.82569500 |

**TS1-insertion**

|    |             |             |             |
|----|-------------|-------------|-------------|
| Cu | 5.16578300  | -2.33864900 | -0.78308400 |
| I  | 3.51608400  | -3.95561500 | 0.78527400  |
| C  | 7.44530000  | -2.15204500 | -1.41514600 |
| C  | 8.47510900  | -1.63294600 | -0.45007100 |
| H  | 6.90461400  | -1.37706000 | -1.95445600 |
| H  | 7.73443800  | -2.97271400 | -2.06448300 |
| C  | 9.45348700  | -0.67836200 | -1.16675700 |
| H  | 8.00222200  | -1.08059500 | 0.36916800  |
| H  | 9.02894700  | -2.46406600 | -0.00015900 |
| C  | 10.51362800 | -0.13578200 | -0.20538200 |
| H  | 9.93610800  | -1.20695300 | -1.99900000 |
| H  | 8.88718500  | 0.15233300  | -1.60020300 |
| H  | 11.19792600 | 0.54624900  | -0.72193900 |
| H  | 10.04492700 | 0.41726300  | 0.61618900  |
| H  | 11.10919700 | -0.94692000 | 0.22971000  |
| C  | 6.48038300  | -3.47944900 | -0.07754100 |
| O  | 7.16879200  | -4.27641800 | 0.39469000  |
| B  | 4.04188800  | -2.23180700 | -4.95778500 |
| O  | 2.90341900  | -2.98313700 | -4.98358800 |
| C  | 2.28856400  | -2.78296700 | -6.28562500 |
| C  | 3.50890200  | -2.31246200 | -7.16045800 |
| O  | 4.38069100  | -1.68881600 | -6.17061200 |
| C  | 4.96996000  | -2.12122300 | -3.67486000 |
| H  | 5.72466400  | -1.33144400 | -3.86644800 |
| C  | 5.69298800  | -3.45964200 | -3.66688400 |
| C  | 5.19190400  | -4.54298300 | -2.93264200 |
| C  | 5.87473200  | -5.76068500 | -2.91813600 |
| C  | 7.04618300  | -5.92283300 | -3.65988900 |
| C  | 7.52515200  | -4.86032900 | -4.43225200 |
| C  | 6.85061700  | -3.63939300 | -4.43589100 |
| H  | 4.27712700  | -4.41969400 | -2.36460200 |
| H  | 5.48464400  | -6.58157000 | -2.32305900 |
| H  | 7.57762600  | -6.87020900 | -3.64501500 |
| H  | 8.42888600  | -4.97990700 | -5.02393100 |
| H  | 7.23154400  | -2.80745600 | -5.02389900 |
| C  | 4.30563700  | -3.47485400 | -7.75956900 |
| H  | 4.56969800  | -4.20667100 | -6.99006500 |
| H  | 3.74503300  | -3.98363600 | -8.55019300 |
| H  | 5.23404000  | -3.08507600 | -8.18801200 |

|   |            |             |             |
|---|------------|-------------|-------------|
| C | 3.17389500 | -1.28095300 | -8.22997700 |
| H | 4.08508600 | -0.99371800 | -8.76417400 |
| H | 2.46790200 | -1.69524500 | -8.95850900 |
| H | 2.73657600 | -0.38064700 | -7.79324500 |
| C | 1.21579300 | -1.70567400 | -6.10525300 |
| H | 0.65333600 | -1.54118500 | -7.03021900 |
| H | 0.52031600 | -2.03002000 | -5.32593500 |
| H | 1.65379100 | -0.75859200 | -5.78063300 |
| C | 1.65460400 | -4.09798400 | -6.72325300 |
| H | 1.24031400 | -4.01130100 | -7.73420800 |
| H | 2.37799800 | -4.91577300 | -6.70764300 |
| H | 0.83881900 | -4.35440600 | -6.04068800 |
| N | 4.21270700 | -1.91490800 | -2.44934500 |
| C | 3.23034000 | -0.94688800 | -2.49467300 |
| C | 2.18128500 | -1.00371800 | -1.54384800 |
| C | 3.18594600 | 0.09496700  | -3.45794200 |
| C | 1.13738600 | -0.09393100 | -1.57644700 |
| H | 2.20464100 | -1.80033900 | -0.80944000 |
| C | 2.13581300 | 1.01219500  | -3.47037600 |
| H | 3.97741700 | 0.19118500  | -4.19398200 |
| C | 1.10307200 | 0.92561400  | -2.53656300 |
| H | 0.34490100 | -0.17114900 | -0.83910500 |
| H | 2.13001700 | 1.80268000  | -4.21716600 |
| H | 0.28586900 | 1.64064300  | -2.55099000 |
| C | 1.09319900 | 1.80456000  | 1.37385000  |
| C | 1.38001200 | 0.54884500  | 1.91695200  |
| C | 2.60966400 | -0.05547700 | 1.67149400  |
| C | 3.57113500 | 0.59971000  | 0.88443800  |
| C | 3.28079700 | 1.85470100  | 0.34108200  |
| C | 2.04244900 | 2.45096600  | 0.58333100  |
| H | 0.64218900 | 0.03540200  | 2.52688700  |
| H | 2.82277100 | -1.04010400 | 2.07688000  |
| H | 4.01088500 | 2.36460700  | -0.27697400 |
| H | 1.82229800 | 3.42265900  | 0.15057200  |
| C | 6.79424700 | -0.47993000 | 4.96504200  |
| C | 6.15904500 | 0.68312100  | 4.51927000  |
| C | 5.65947900 | 0.75144200  | 3.22097000  |
| C | 5.80259400 | -0.33906500 | 2.34672800  |
| C | 6.42363600 | -1.50550500 | 2.80792500  |
| C | 6.92067000 | -1.57458200 | 4.11090200  |
| H | 6.04609700 | 1.53266900  | 5.18687200  |
| H | 5.14812200 | 1.64708700  | 2.88150000  |
| H | 6.49539300 | -2.37138800 | 2.16207200  |
| H | 7.39302600 | -2.48880300 | 4.45798700  |

|   |            |             |             |
|---|------------|-------------|-------------|
| C | 7.80073700 | 2.81098300  | -1.64881600 |
| C | 6.80109800 | 2.08256600  | -2.29853900 |
| C | 6.02347100 | 1.17205600  | -1.58458200 |
| C | 6.22032400 | 0.99259800  | -0.20447900 |
| C | 7.22595000 | 1.72515500  | 0.43899600  |
| C | 8.01209000 | 2.62674800  | -0.28165500 |
| H | 6.62780600 | 2.21708800  | -3.36249900 |
| H | 5.24756700 | 0.61076800  | -2.09359900 |
| H | 7.39977100 | 1.58904500  | 1.50067000  |
| H | 8.79155600 | 3.18544700  | 0.22869100  |
| P | 5.16750400 | -0.26382000 | 0.62779600  |
| H | 8.41351300 | 3.51422800  | -2.20535100 |
| H | 7.17687000 | -0.53453600 | 5.98026700  |
| H | 0.13089300 | 2.27238900  | 1.56211500  |

**TS2-insertion**

|   |            |             |             |
|---|------------|-------------|-------------|
| C | 2.57391600 | 3.08077500  | 1.62410200  |
| C | 2.39173600 | 1.70826800  | 1.45590700  |
| C | 3.35936500 | 0.94848200  | 0.79577000  |
| C | 4.51394800 | 1.56289900  | 0.29671900  |
| C | 4.70730800 | 2.93995100  | 0.49544900  |
| C | 3.73637200 | 3.69567500  | 1.14854300  |
| H | 1.50273100 | 1.22041300  | 1.84479300  |
| H | 3.23020300 | -0.12310600 | 0.68962300  |
| H | 5.62085500 | 3.41353000  | 0.14820000  |
| H | 3.88925800 | 4.76106000  | 1.29597000  |
| C | 6.46785700 | 2.19639300  | -4.80787100 |
| C | 5.56583700 | 2.84340500  | -3.96487200 |
| C | 5.32386900 | 2.35699000  | -2.67941400 |
| C | 5.99392400 | 1.22039500  | -2.21582800 |
| C | 6.89510000 | 0.56734900  | -3.07636800 |
| C | 7.13153100 | 1.05153500  | -4.36115300 |
| H | 5.03554200 | 3.72646300  | -4.30984300 |
| H | 4.60081200 | 2.85494800  | -2.04554700 |
| H | 7.42985800 | -0.31442800 | -2.73440200 |
| H | 7.83406200 | 0.53689500  | -5.01053400 |
| C | 9.64898900 | 1.63672400  | 1.77568700  |
| C | 8.47031700 | 1.30752300  | 2.45042300  |
| C | 7.31201000 | 1.01598500  | 1.73462000  |
| C | 7.31270100 | 1.05157900  | 0.33038800  |
| C | 8.49364000 | 1.39572300  | -0.33846900 |
| C | 9.65483900 | 1.68443900  | 0.38187700  |
| H | 8.45392200 | 1.26965800  | 3.53560300  |
| H | 6.40307800 | 0.75600900  | 2.26807100  |

|    |             |             |             |
|----|-------------|-------------|-------------|
| H  | 8.51383800  | 1.44711100  | -1.42054800 |
| H  | 10.56393500 | 1.94754200  | -0.15149300 |
| P  | 5.76923000  | 0.52763200  | -0.53406600 |
| Cu | 5.52602600  | -1.88316500 | -0.35317300 |
| B  | 2.91235100  | -3.52133200 | -2.78384400 |
| O  | 1.61123900  | -3.27829600 | -3.16006700 |
| C  | 0.87500900  | -4.51107500 | -2.94986500 |
| C  | 2.01596400  | -5.59789600 | -2.98991600 |
| O  | 3.18516500  | -4.84638500 | -2.57530500 |
| C  | 2.31270000  | -6.11620300 | -4.40002500 |
| H  | 3.23754100  | -6.70000700 | -4.37268700 |
| H  | 1.50666800  | -6.75527100 | -4.77471100 |
| H  | 2.45552100  | -5.28727600 | -5.10026800 |
| C  | 1.83230200  | -6.75762400 | -2.01831300 |
| H  | 0.91533400  | -7.31356700 | -2.24400800 |
| H  | 2.67873800  | -7.44634400 | -2.10552200 |
| H  | 1.78844100  | -6.40344700 | -0.98655200 |
| C  | -0.16870800 | -4.64141600 | -4.05349800 |
| H  | -0.70404500 | -5.59374000 | -3.96829600 |
| H  | -0.89860100 | -3.83100400 | -3.96338100 |
| H  | 0.28402200  | -4.58054100 | -5.04534100 |
| C  | 0.19300200  | -4.39461000 | -1.58425000 |
| H  | -0.45361700 | -3.51173200 | -1.58985700 |
| H  | -0.42280300 | -5.27340400 | -1.36716700 |
| H  | 0.92716400  | -4.26887200 | -0.78397300 |
| C  | 5.23362000  | -2.46495700 | -2.39903700 |
| H  | 5.71681200  | -1.60107000 | -2.84870100 |
| C  | 6.08460700  | -3.66649600 | -2.49151400 |
| C  | 7.27623700  | -3.55043800 | -3.23596800 |
| C  | 8.17764900  | -4.61158500 | -3.33662500 |
| C  | 7.91624200  | -5.81047600 | -2.67787400 |
| C  | 6.75540700  | -5.92813400 | -1.90295500 |
| C  | 5.85477400  | -4.87482600 | -1.80064700 |
| H  | 7.48004500  | -2.62327100 | -3.76600300 |
| H  | 9.08102000  | -4.49519500 | -3.92898000 |
| H  | 8.61391300  | -6.63997900 | -2.74953700 |
| H  | 6.55629600  | -6.84928200 | -1.36216100 |
| H  | 4.98183000  | -4.96746600 | -1.17140200 |
| N  | 3.86229100  | -2.44231300 | -2.72584100 |
| C  | 3.33771100  | -1.13626900 | -3.02069300 |
| C  | 3.67142400  | -0.51275600 | -4.22642900 |
| C  | 2.47564900  | -0.50748100 | -2.12164100 |
| C  | 3.12460800  | 0.72908800  | -4.53966800 |
| H  | 4.34093700  | -1.01626400 | -4.91699900 |

|   |             |             |             |
|---|-------------|-------------|-------------|
| C | 1.94480000  | 0.74527600  | -2.43157000 |
| H | 2.22427000  | -1.01586100 | -1.19869600 |
| C | 2.26049500  | 1.36146900  | -3.64248600 |
| H | 3.37985600  | 1.20650500  | -5.48041900 |
| H | 1.28585500  | 1.23659500  | -1.72180400 |
| H | 1.83958600  | 2.33313800  | -3.88580600 |
| H | 10.55439100 | 1.85657800  | 2.33385000  |
| H | 6.65058000  | 2.57688100  | -5.80867800 |
| H | 1.82062700  | 3.67113100  | 2.13829100  |
| I | 3.42478300  | -3.07665400 | 0.76868600  |
| C | 7.91139500  | -2.50077200 | -0.25343300 |
| C | 9.15081700  | -2.09970400 | 0.50997400  |
| H | 7.80218800  | -1.96152600 | -1.19220500 |
| H | 7.75038000  | -3.56878000 | -0.38750700 |
| C | 10.40030800 | -2.12848300 | -0.39074700 |
| H | 9.05172300  | -1.08868800 | 0.91750600  |
| H | 9.29532300  | -2.76762700 | 1.36732300  |
| C | 11.67203100 | -1.75557900 | 0.37609700  |
| H | 10.50687200 | -3.12235900 | -0.84457800 |
| H | 10.24953900 | -1.42347100 | -1.22027700 |
| H | 12.55071900 | -1.75511400 | -0.27924000 |
| H | 11.57722200 | -0.75695400 | 0.81860900  |
| H | 11.86150000 | -2.46372500 | 1.19150600  |
| C | 6.50820300  | -2.02227200 | 1.31899400  |
| O | 6.91959900  | -2.21899000 | 2.38473900  |

**TS3-insertion**

|    |             |             |             |
|----|-------------|-------------|-------------|
| Cu | 5.28353100  | -1.89743600 | -0.04741500 |
| I  | 4.04970800  | -2.78596700 | 2.69384100  |
| C  | 6.49241800  | -3.76893800 | -0.51831300 |
| C  | 7.86875500  | -3.43735500 | -1.02168300 |
| H  | 5.71777600  | -3.89042800 | -1.26856800 |
| H  | 6.43586800  | -4.51459700 | 0.27428000  |
| C  | 8.55094800  | -4.68241800 | -1.63060500 |
| H  | 7.80914600  | -2.66396800 | -1.79254600 |
| H  | 8.50640600  | -3.05478600 | -0.21672400 |
| C  | 9.93824300  | -4.34670400 | -2.18355600 |
| H  | 8.62878200  | -5.46490600 | -0.86453200 |
| H  | 7.91845200  | -5.08342600 | -2.43118100 |
| H  | 10.42273900 | -5.23223800 | -2.61053900 |
| H  | 9.86555900  | -3.58632900 | -2.96918000 |
| H  | 10.59073600 | -3.95392400 | -1.39411200 |
| C  | 6.48713600  | -2.44709700 | 1.37179400  |
| O  | 7.37709300  | -2.76676800 | 2.03450500  |

|   |             |             |             |
|---|-------------|-------------|-------------|
| C | 5.20939300  | 0.21380700  | 0.13627300  |
| N | 4.33092300  | 1.20885600  | -0.19879400 |
| C | 4.81009900  | 2.48040600  | 0.15727400  |
| C | 6.03614500  | 2.28565800  | 0.70789900  |
| N | 6.24946600  | 0.90341500  | 0.69496200  |
| H | 5.81510900  | 1.56066600  | 3.31371600  |
| C | 0.44382500  | 1.16209500  | -1.86428400 |
| C | 0.65607500  | 0.82070000  | -0.52587500 |
| H | -0.19224800 | 0.55735500  | 0.09983800  |
| C | 1.93510800  | 0.77866700  | 0.03249400  |
| C | 3.98076600  | 1.96294900  | -3.01259300 |
| H | 3.84311200  | 3.01214800  | -3.30326900 |
| C | 2.13342900  | 0.39178800  | 1.47018600  |
| H | 2.83961000  | 1.05735900  | 1.97916300  |
| H | 10.51781200 | -0.76688500 | 0.56037700  |
| C | 9.71299200  | -0.62647700 | 2.55219500  |
| C | 8.60265000  | -0.24214200 | 3.31053700  |
| H | 8.63309200  | -0.34863600 | 4.39185200  |
| H | 1.40537000  | 1.77786000  | -3.68813400 |
| C | 7.43537600  | 0.23946800  | 2.71652100  |
| C | 8.47138300  | 0.18350800  | -0.97128900 |
| C | 2.84615200  | 1.50709100  | -2.12673500 |
| H | 9.40158300  | -0.15322400 | -1.43653100 |
| C | 7.41595300  | 0.34482500  | 1.31713400  |
| C | 8.52026600  | 0.01223800  | 0.52264800  |
| C | 9.65725100  | -0.48534600 | 1.16235800  |
| H | 1.18359400  | 0.41434600  | 2.01124700  |
| H | 2.54187100  | -0.62087500 | 1.55200500  |
| H | 3.99954100  | 1.36677400  | -3.92946500 |
| H | 4.95143900  | 1.87875900  | -2.52013600 |
| H | 6.46354200  | 0.53933800  | 4.61090700  |
| H | 5.42249900  | -0.15980400 | 3.36295700  |
| H | 7.65322500  | -0.38988300 | -1.41138700 |
| H | 8.30840400  | 1.23250100  | -1.25042800 |
| C | 1.54797500  | 1.50478200  | -2.64601500 |
| C | 6.22101800  | 0.57001800  | 3.54541000  |
| C | 3.02306300  | 1.10376900  | -0.79369900 |
| C | -0.93872900 | 1.11590900  | -2.46641300 |
| H | -1.71390600 | 1.23424300  | -1.70276700 |
| H | -1.07655800 | 1.89808100  | -3.22065800 |
| H | -1.11406100 | 0.15180300  | -2.96283800 |
| C | 10.93036200 | -1.21514300 | 3.21977900  |
| H | 11.12067300 | -0.74805100 | 4.19184800  |
| H | 10.78984000 | -2.28923700 | 3.39649900  |

|   |             |             |             |
|---|-------------|-------------|-------------|
| H | 11.82542800 | -1.09700900 | 2.60069200  |
| C | 7.05055600  | 3.24844100  | 1.22474500  |
| H | 7.27062600  | 3.08271300  | 2.28453900  |
| H | 7.99782000  | 3.15373700  | 0.68110600  |
| H | 6.69179900  | 4.27376300  | 1.10523700  |
| C | 4.01851200  | 3.72890600  | -0.03760000 |
| H | 3.88984200  | 3.98094500  | -1.09534000 |
| H | 3.01804800  | 3.63052500  | 0.39702100  |
| H | 4.52251400  | 4.56666000  | 0.45126200  |
| B | 3.31392400  | -1.75126200 | -3.96586700 |
| O | 2.92368900  | -2.96164000 | -4.46787300 |
| C | 1.99438600  | -2.70300700 | -5.55555100 |
| C | 2.37005000  | -1.23402000 | -5.97035300 |
| O | 2.88793500  | -0.68537300 | -4.72643700 |
| C | 4.32902600  | -1.54661900 | -2.76562300 |
| H | 4.28464700  | -0.49049400 | -2.48671100 |
| C | 5.67582800  | -1.78481000 | -3.44029900 |
| C | 6.01458300  | -3.06731800 | -3.90103700 |
| C | 7.20584000  | -3.28569600 | -4.58790200 |
| C | 8.08668000  | -2.22514000 | -4.82819900 |
| C | 7.75576400  | -0.94532200 | -4.38511700 |
| C | 6.55435200  | -0.72960600 | -3.70374200 |
| H | 5.32368900  | -3.88371000 | -3.72007500 |
| H | 7.45098900  | -4.28406900 | -4.93988400 |
| H | 9.01607400  | -2.39696400 | -5.36397400 |
| H | 8.42956700  | -0.11234700 | -4.56748700 |
| H | 6.29617400  | 0.27020000  | -3.36976300 |
| C | 3.51990500  | -1.16679600 | -6.97978800 |
| H | 4.36971500  | -1.77018500 | -6.64603600 |
| H | 3.20939300  | -1.51294200 | -7.97069400 |
| H | 3.85608500  | -0.12887600 | -7.06481700 |
| C | 1.19994000  | -0.37127700 | -6.42656400 |
| H | 1.55768700  | 0.63393000  | -6.67215700 |
| H | 0.73075800  | -0.79319000 | -7.32227500 |
| H | 0.44286800  | -0.28159700 | -5.64444300 |
| C | 0.58188100  | -2.82600500 | -4.97874200 |
| H | -0.17785100 | -2.73584200 | -5.76223200 |
| H | 0.47918600  | -3.80301300 | -4.49885500 |
| H | 0.39747100  | -2.06733400 | -4.21495600 |
| C | 2.22100400  | -3.75376900 | -6.63606600 |
| H | 1.59230000  | -3.55376500 | -7.51113300 |
| H | 3.26586300  | -3.78325700 | -6.95238300 |
| H | 1.95641600  | -4.74093800 | -6.24507100 |
| N | 4.15163700  | -2.43129200 | -1.61689800 |



|   |             |             |             |
|---|-------------|-------------|-------------|
| C | 2.84874000  | -2.72895700 | -1.23402400 |
| C | 2.64081700  | -3.86942300 | -0.41891800 |
| C | 1.70431600  | -2.01343500 | -1.64624900 |
| C | 1.36497300  | -4.28390000 | -0.06954800 |
| H | 3.50672000  | -4.42190100 | -0.07327000 |
| C | 0.42435000  | -2.44428700 | -1.30412300 |
| H | 1.81516200  | -1.10252900 | -2.22024200 |
| C | 0.23969100  | -3.58020100 | -0.51685800 |
| H | 1.24499600  | -5.16216600 | 0.55853500  |
| H | -0.43602300 | -1.87287100 | -1.64368000 |
| H | -0.75968600 | -3.90860400 | -0.24625700 |

**TS4-insertion**

|    |            |             |             |
|----|------------|-------------|-------------|
| Cu | 4.73590100 | -1.62643400 | -0.04111000 |
| B  | 3.10484800 | -4.04988800 | -1.85263100 |
| O  | 4.28830000 | -4.54940700 | -1.35379600 |
| C  | 4.21396900 | -5.99406400 | -1.39917300 |
| C  | 2.66123000 | -6.25806800 | -1.50800400 |
| O  | 2.17049700 | -5.02952200 | -2.10338600 |
| C  | 1.97612900 | -6.40936900 | -0.14804800 |
| H  | 0.89224000 | -6.41006800 | -0.30006900 |
| H  | 2.25741800 | -7.34941700 | 0.33816400  |
| H  | 2.22422200 | -5.57658400 | 0.51435900  |
| C  | 2.27404400 | -7.41600200 | -2.42309300 |
| H  | 2.67944500 | -8.36153700 | -2.04559600 |
| H  | 1.18371600 | -7.50260700 | -2.45586500 |
| H  | 2.63101800 | -7.26286300 | -3.44387900 |
| C  | 4.87449400 | -6.53768000 | -0.13672300 |
| H  | 4.78605400 | -7.62873800 | -0.08733800 |
| H  | 5.93974300 | -6.28272900 | -0.14381300 |
| H  | 4.42858900 | -6.10237900 | 0.75922600  |
| C  | 4.99382800 | -6.43666900 | -2.64181100 |
| H  | 6.01326900 | -6.04253200 | -2.58011500 |
| H  | 5.04824700 | -7.52728800 | -2.71758300 |
| H  | 4.53371400 | -6.04945800 | -3.55625300 |
| C  | 3.91587800 | -1.65358500 | -1.99808500 |
| H  | 3.43016500 | -0.69118600 | -1.87896800 |
| C  | 5.02131400 | -1.60212000 | -2.96397400 |
| C  | 5.73437500 | -0.39709700 | -3.14622100 |
| C  | 6.76098600 | -0.29629400 | -4.07755800 |
| C  | 7.14174900 | -1.40700600 | -4.83924400 |
| C  | 6.47184300 | -2.61468400 | -4.65038100 |
| C  | 5.42926500 | -2.71359600 | -3.72880300 |
| H  | 5.46294200 | 0.46429300  | -2.54646400 |

|   |             |             |             |
|---|-------------|-------------|-------------|
| H | 7.26876300  | 0.65521500  | -4.21350300 |
| H | 7.94570200  | -1.32787000 | -5.56517400 |
| H | 6.75407100  | -3.49030200 | -5.22924400 |
| H | 4.90403200  | -3.65236900 | -3.61937000 |
| N | 2.91417000  | -2.67383800 | -2.16359200 |
| C | 1.65520000  | -2.21677100 | -2.64295800 |
| C | 1.60597700  | -1.39737300 | -3.77998100 |
| C | 0.46247000  | -2.57119100 | -1.99951600 |
| C | 0.38272600  | -0.94007900 | -4.26729600 |
| H | 2.53142900  | -1.14621900 | -4.28893900 |
| C | -0.75696700 | -2.12246400 | -2.50104700 |
| H | 0.50696200  | -3.18724400 | -1.11010000 |
| C | -0.80632100 | -1.30320700 | -3.63184900 |
| H | 0.35929400  | -0.31228500 | -5.15440100 |
| H | -1.67659000 | -2.40456000 | -1.99563900 |
| H | -1.76153900 | -0.95430900 | -4.01443200 |
| I | 2.67464700  | -2.69341500 | 1.40295500  |
| C | 6.74848800  | -2.80868800 | -0.77232900 |
| C | 7.99696300  | -3.42462600 | -0.20742300 |
| H | 6.89441900  | -1.83922000 | -1.24076200 |
| H | 6.08768200  | -3.47552900 | -1.31071300 |
| C | 9.03564700  | -3.63536100 | -1.33017200 |
| H | 8.44625100  | -2.78530800 | 0.55796300  |
| H | 7.77237200  | -4.38745900 | 0.26745000  |
| C | 10.35087200 | -4.20596100 | -0.79206400 |
| H | 8.61761000  | -4.29952300 | -2.09726500 |
| H | 9.22347500  | -2.67497900 | -1.82805200 |
| H | 11.07901000 | -4.36041500 | -1.59649000 |
| H | 10.79899000 | -3.52540300 | -0.05799000 |
| H | 10.18929700 | -5.17000700 | -0.29503300 |
| C | 5.84986100  | -2.47358400 | 1.26818200  |
| O | 6.34871700  | -3.03035900 | 2.14846000  |
| C | 5.06323800  | 0.43939200  | 0.20620300  |
| N | 4.19069100  | 1.47040400  | 0.02377600  |
| C | 4.78492600  | 2.71817500  | 0.26263100  |
| C | 6.08060300  | 2.46426500  | 0.59317600  |
| N | 6.22521600  | 1.06846900  | 0.54573100  |
| H | 5.96406800  | 1.25953600  | 3.24371600  |
| C | 0.02281200  | 0.94195600  | -0.44253700 |
| C | 0.63323700  | 0.83711300  | 0.81311200  |
| H | 0.02997000  | 0.59111300  | 1.68303900  |
| C | 2.00147900  | 1.02954700  | 0.98127200  |
| C | 2.99009300  | 1.87543600  | -2.64235000 |
| H | 2.49281700  | 2.69317100  | -3.17582600 |

|   |             |             |             |
|---|-------------|-------------|-------------|
| C | 2.63403600  | 0.95644600  | 2.34578600  |
| H | 3.28645900  | 1.81740300  | 2.53469100  |
| H | 10.51370100 | -0.49678200 | -0.02892200 |
| C | 9.73641600  | -0.82868100 | 1.94750300  |
| C | 8.63634600  | -0.62575200 | 2.78904800  |
| H | 8.68422600  | -0.96454200 | 3.82069200  |
| H | 0.35054000  | 1.38508900  | -2.51671200 |
| C | 7.47228300  | -0.00303600 | 2.33971300  |
| C | 8.48554400  | 0.73400200  | -1.29520200 |
| C | 2.19249100  | 1.48359200  | -1.42247900 |
| H | 9.42322800  | 1.24076000  | -1.54840700 |
| C | 7.41813900  | 0.40649400  | 0.99523400  |
| C | 8.51103200  | 0.25695700  | 0.13337200  |
| C | 9.66065100  | -0.36669400 | 0.63308000  |
| H | 1.86527800  | 0.92866800  | 3.12255600  |
| H | 3.23364400  | 0.04737500  | 2.44305700  |
| H | 3.07537000  | 1.03839800  | -3.34324800 |
| H | 4.00177400  | 2.20030400  | -2.38992800 |
| H | 6.57851500  | -0.03148500 | 4.29580800  |
| H | 5.44879300  | -0.40211600 | 2.98491900  |
| H | 8.36818300  | -0.10619900 | -1.98661900 |
| H | 7.65771600  | 1.41938400  | -1.48659800 |
| C | 0.81105200  | 1.28576100  | -1.53882200 |
| C | 6.30495800  | 0.21832600  | 3.26738000  |
| C | 2.77178300  | 1.31032600  | -0.16089300 |
| C | -1.46088500 | 0.71230800  | -0.58652100 |
| H | -2.03436300 | 1.43732500  | 0.00475100  |
| H | -1.77695200 | 0.79209300  | -1.62980800 |
| H | -1.73364200 | -0.28801400 | -0.23284800 |
| C | 10.96077400 | -1.55626200 | 2.44465300  |
| H | 11.16953000 | -1.32142100 | 3.49366800  |
| H | 10.81979200 | -2.64284600 | 2.37665000  |
| H | 11.84625200 | -1.30244200 | 1.85327400  |
| C | 7.20562600  | 3.36862800  | 0.96464800  |
| H | 7.62279500  | 3.10318700  | 1.94271200  |
| H | 8.02599200  | 3.31755500  | 0.23905500  |
| H | 6.85894400  | 4.40417600  | 1.01084600  |
| C | 4.01989300  | 3.99314000  | 0.16265000  |
| H | 3.66616300  | 4.17564900  | -0.85847100 |
| H | 3.13683000  | 3.97501800  | 0.81109600  |
| H | 4.64791800  | 4.83694000  | 0.46009900  |

**IM20**

|    |            |            |             |
|----|------------|------------|-------------|
| Cu | 0.58944500 | 0.53248300 | -2.94903500 |
|----|------------|------------|-------------|

|   |             |             |             |
|---|-------------|-------------|-------------|
| I | 0.50834000  | -0.20941200 | -5.59269200 |
| C | -5.50057000 | -1.44836600 | -1.53236300 |
| H | -5.04723800 | -1.40366000 | -0.53521500 |
| H | -6.17726800 | -2.30995500 | -1.56064400 |
| H | -6.10374900 | -0.54119500 | -1.65885100 |
| C | -4.41987500 | -1.55007900 | -2.61218200 |
| H | -3.83861700 | -2.46882400 | -2.46598900 |
| H | -4.88603800 | -1.62620000 | -3.60432500 |
| C | -3.46788700 | -0.35224600 | -2.57634700 |
| H | -3.04415600 | -0.25489900 | -1.57552300 |
| H | -4.01093700 | 0.57904100  | -2.77589000 |
| C | -2.32702700 | -0.51204000 | -3.59139300 |
| H | -2.69440300 | -0.47799300 | -4.62418700 |
| H | -1.79630800 | -1.45407700 | -3.46090100 |
| O | -1.54447300 | 1.80617200  | -3.52996800 |
| C | -1.36373400 | 0.63246500  | -3.47587700 |
| B | 0.28679300  | -0.88937400 | 1.10325000  |
| O | 1.53412500  | -1.46059900 | 1.12078900  |
| C | 1.52181900  | -2.53303200 | 2.09900600  |
| C | 0.32577800  | -2.11787200 | 3.03370500  |
| O | -0.49586700 | -1.30411000 | 2.15089800  |
| C | -0.11632700 | 0.15017700  | -0.03427200 |
| H | 0.66587700  | 0.92308800  | 0.02302400  |
| C | -1.42923000 | 0.91622000  | 0.12512300  |
| C | -1.54633400 | 2.14032400  | -0.54659800 |
| C | -2.72656900 | 2.87867800  | -0.51574800 |
| C | -3.82232100 | 2.40978100  | 0.21131600  |
| C | -3.71140600 | 1.21079500  | 0.91611100  |
| C | -2.52535500 | 0.47304700  | 0.87892300  |
| H | -0.70665500 | 2.51022100  | -1.12340500 |
| H | -2.78344900 | 3.81582700  | -1.06216200 |
| H | -4.74871900 | 2.97719600  | 0.23741600  |
| H | -4.55083700 | 0.84450400  | 1.50150500  |
| H | -2.44774600 | -0.44011200 | 1.45601500  |
| C | -0.52395700 | -3.27636400 | 3.54171400  |
| H | 0.07388600  | -3.95476900 | 4.16044000  |
| H | -1.34428700 | -2.89003000 | 4.15481400  |
| H | -0.95360800 | -3.84367300 | 2.71394000  |
| C | 0.74228900  | -1.20778700 | 4.19227300  |
| H | 1.34011800  | -0.36436300 | 3.83362500  |
| H | -0.15752400 | -0.80661100 | 4.66793200  |
| H | 1.32078900  | -1.75145700 | 4.94590400  |
| C | 2.88248200  | -2.57715700 | 2.78705500  |
| H | 2.88722100  | -3.32359300 | 3.58909500  |

|   |             |             |             |
|---|-------------|-------------|-------------|
| H | 3.65240200  | -2.85930700 | 2.06204300  |
| H | 3.15428500  | -1.60757800 | 3.20976500  |
| C | 1.27978900  | -3.83379100 | 1.32705400  |
| H | 2.05521700  | -3.93938700 | 0.56334300  |
| H | 1.32287000  | -4.70456300 | 1.98968600  |
| H | 0.31697900  | -3.82306700 | 0.81249400  |
| N | 0.11003300  | -0.49494500 | -1.34541200 |
| C | -0.31319500 | -1.79871000 | -1.52321500 |
| C | -1.35798900 | -2.42029300 | -0.79667300 |
| C | 0.36000800  | -2.58887000 | -2.49035300 |
| C | -1.69649000 | -3.75520900 | -1.02265000 |
| H | -1.92427400 | -1.85007200 | -0.07406900 |
| C | 0.00095200  | -3.90965500 | -2.72144300 |
| H | 1.17887100  | -2.14263000 | -3.04233100 |
| C | -1.02823500 | -4.51251800 | -1.98588900 |
| H | -2.50547400 | -4.19899100 | -0.44669600 |
| H | 0.53725900  | -4.47824600 | -3.47702300 |
| H | -1.30239000 | -5.54808500 | -2.16375300 |
| C | 2.29304900  | 1.65365600  | -2.92198400 |
| N | 2.47144700  | 2.99704200  | -3.00090600 |
| C | 3.82604000  | 3.34291900  | -3.11078400 |
| C | 4.51635900  | 2.16612000  | -3.09931800 |
| N | 3.55535700  | 1.15503800  | -2.98890200 |
| H | 4.39129700  | 1.02088900  | -0.40889900 |
| C | -0.77561300 | 5.67373600  | -2.67975400 |
| C | -0.06691500 | 5.26975300  | -1.54428200 |
| H | -0.37628800 | 5.62544400  | -0.56474700 |
| C | 1.02037700  | 4.39679400  | -1.63344400 |
| C | 1.13827100  | 3.81214600  | -5.41850200 |
| H | 0.62339500  | 4.35217000  | -6.21796600 |
| C | 1.75665000  | 3.93999500  | -0.39958600 |
| H | 2.81567400  | 4.22306400  | -0.42812700 |
| H | 4.16723500  | -3.12881500 | -4.53580500 |
| C | 3.95172400  | -2.99668100 | -2.39996000 |
| C | 3.84786400  | -2.12028600 | -1.31429100 |
| H | 3.79102800  | -2.51618500 | -0.30571600 |
| H | -0.89742000 | 5.51872600  | -4.82200200 |
| C | 3.77564900  | -0.74155200 | -1.49717700 |
| C | 4.16638100  | -0.53043600 | -5.31107700 |
| C | 0.72064300  | 4.33205400  | -4.06903400 |
| H | 5.23161900  | -0.37512700 | -5.53337200 |
| C | 3.80746900  | -0.24849800 | -2.81103200 |
| C | 3.99621500  | -1.08108900 | -3.91918400 |
| C | 4.05661000  | -2.46052700 | -3.68523100 |

|   |             |             |             |
|---|-------------|-------------|-------------|
| H | 1.31105800  | 4.37205300  | 0.50024200  |
| H | 1.72577500  | 2.84937400  | -0.30515600 |
| H | 0.89973900  | 2.74731200  | -5.51874800 |
| H | 2.21847400  | 3.91152400  | -5.57549300 |
| H | 3.81599200  | -0.32070100 | 0.61193400  |
| H | 2.66863400  | 0.65224400  | -0.29941000 |
| H | 3.76854600  | -1.22497200 | -6.05479800 |
| H | 3.64703500  | 0.42046500  | -5.43863900 |
| C | -0.35975600 | 5.20664200  | -3.93004100 |
| C | 3.66413800  | 0.20403100  | -0.33127200 |
| C | 1.38837200  | 3.93386900  | -2.90387900 |
| C | -1.98444100 | 6.56903500  | -2.55677400 |
| H | -1.94795500 | 7.17005900  | -1.64254300 |
| H | -2.06835500 | 7.24905200  | -3.41101900 |
| H | -2.90776200 | 5.97568200  | -2.52343600 |
| C | 3.89885700  | -4.48770500 | -2.18039400 |
| H | 4.43824600  | -4.78135500 | -1.27288500 |
| H | 2.85699400  | -4.81340600 | -2.06202000 |
| H | 4.32553400  | -5.03711300 | -3.02560300 |
| C | 5.97420300  | 1.86862300  | -3.17483200 |
| H | 6.29104800  | 1.23121100  | -2.34137100 |
| H | 6.23173100  | 1.34369200  | -4.10213300 |
| H | 6.55531700  | 2.79385400  | -3.13798400 |
| C | 4.27507400  | 4.75940500  | -3.22133100 |
| H | 3.87856000  | 5.23792700  | -4.12484700 |
| H | 3.93761000  | 5.35658700  | -2.36611200 |
| H | 5.36623600  | 4.81015500  | -3.26313500 |

**TS15**

|    |             |             |             |
|----|-------------|-------------|-------------|
| Cu | 0.62412700  | 0.54208200  | -2.97831200 |
| I  | 0.46713400  | -0.13690200 | -5.60454000 |
| C  | -5.60849700 | -1.56304000 | -1.69899400 |
| H  | -5.22639300 | -1.51847600 | -0.67210700 |
| H  | -6.25929400 | -2.44085200 | -1.78141700 |
| H  | -6.22477600 | -0.67005500 | -1.85853500 |
| C  | -4.45458100 | -1.62483900 | -2.70362700 |
| H  | -3.86486700 | -2.53445700 | -2.53389100 |
| H  | -4.85078300 | -1.69219300 | -3.72622700 |
| C  | -3.53211100 | -0.41021700 | -2.58088300 |
| H  | -3.16259900 | -0.33822700 | -1.55657300 |
| H  | -4.08412500 | 0.51725500  | -2.77532900 |
| C  | -2.33936100 | -0.50730600 | -3.54416100 |
| H  | -2.64880400 | -0.38507000 | -4.58837200 |
| H  | -1.82432100 | -1.46296300 | -3.46405600 |

|   |             |             |             |
|---|-------------|-------------|-------------|
| O | -1.54008500 | 1.78618400  | -3.23873500 |
| C | -1.37771600 | 0.61038500  | -3.28279800 |
| B | 0.21583300  | -0.81011900 | 1.04867100  |
| O | 1.47779900  | -1.34677800 | 1.05153300  |
| C | 1.51186200  | -2.40668200 | 2.04384400  |
| C | 0.31268200  | -2.02021300 | 2.98720900  |
| O | -0.54236400 | -1.23958500 | 2.10754000  |
| C | -0.24067000 | 0.21949100  | -0.07844200 |
| H | 0.53075900  | 1.00430700  | -0.05357200 |
| C | -1.55821300 | 0.95840500  | 0.15410700  |
| C | -1.68588800 | 2.24996800  | -0.37429000 |
| C | -2.87474100 | 2.96781000  | -0.26479700 |
| C | -3.96795900 | 2.41008100  | 0.39983900  |
| C | -3.84673000 | 1.14023700  | 0.96562400  |
| C | -2.65340200 | 0.42440500  | 0.84948900  |
| H | -0.84968000 | 2.69189200  | -0.90286900 |
| H | -2.94139700 | 3.96107100  | -0.70086900 |
| H | -4.89972300 | 2.96246400  | 0.48679100  |
| H | -4.68243300 | 0.70312300  | 1.50602800  |
| H | -2.56791300 | -0.54204200 | 1.33032000  |
| C | -0.49570900 | -3.19993000 | 3.51373700  |
| H | 0.12879100  | -3.85488400 | 4.13140900  |
| H | -1.32088800 | -2.83336900 | 4.13239400  |
| H | -0.91664800 | -3.78682100 | 2.69521400  |
| C | 0.71157800  | -1.08773900 | 4.13440100  |
| H | 1.27931200  | -0.22897200 | 3.76346000  |
| H | -0.19608800 | -0.71060900 | 4.61466900  |
| H | 1.31358200  | -1.60609600 | 4.88748100  |
| C | 2.87912300  | -2.39650500 | 2.72045500  |
| H | 2.91103900  | -3.12395700 | 3.53918000  |
| H | 3.65195300  | -2.67356900 | 1.99686100  |
| H | 3.12611700  | -1.41023100 | 3.11909700  |
| C | 1.30698600  | -3.72521600 | 1.29202200  |
| H | 2.07216200  | -3.80977100 | 0.51592200  |
| H | 1.39517500  | -4.58494600 | 1.96461300  |
| H | 0.33631900  | -3.75919100 | 0.79417800  |
| N | -0.06118900 | -0.42792300 | -1.39821700 |
| C | -0.37600000 | -1.76946600 | -1.54247800 |
| C | -1.39345700 | -2.43649500 | -0.81958300 |
| C | 0.36508200  | -2.53933200 | -2.47206000 |
| C | -1.64481700 | -3.79500000 | -1.01549700 |
| H | -2.00805400 | -1.88261900 | -0.12455600 |
| C | 0.09276500  | -3.88593600 | -2.67657300 |
| H | 1.16445700  | -2.05843900 | -3.02364600 |

|   |             |             |             |
|---|-------------|-------------|-------------|
| C | -0.91139100 | -4.53310100 | -1.94587500 |
| H | -2.43643900 | -4.27324700 | -0.44311300 |
| H | 0.67917000  | -4.43753500 | -3.40694700 |
| H | -1.11823900 | -5.58753800 | -2.10262300 |
| C | 2.33226100  | 1.62078400  | -2.93451900 |
| N | 2.52097800  | 2.96306100  | -3.01059700 |
| C | 3.87760900  | 3.29672100  | -3.13339800 |
| C | 4.55745100  | 2.11366600  | -3.13502100 |
| N | 3.58814900  | 1.11084400  | -3.01762700 |
| H | 4.39560200  | 1.02402600  | -0.46947600 |
| C | -0.71291400 | 5.64630000  | -2.61850000 |
| C | 0.00272600  | 5.21925000  | -1.49591100 |
| H | -0.29918800 | 5.55704900  | -0.50759000 |
| C | 1.08685600  | 4.34524000  | -1.60943600 |
| C | 1.18614700  | 3.84674300  | -5.40844300 |
| H | 0.67948900  | 4.41767900  | -6.19158800 |
| C | 1.83381500  | 3.86630300  | -0.39045600 |
| H | 2.88994100  | 4.16067800  | -0.41873500 |
| H | 4.14708000  | -3.18807900 | -4.54364800 |
| C | 3.97697400  | -3.03880400 | -2.40503400 |
| C | 3.89280600  | -2.15345200 | -1.32472500 |
| H | 3.86392300  | -2.54306900 | -0.31237700 |
| H | -0.84394200 | 5.54027900  | -4.76294100 |
| C | 3.81453400  | -0.77608800 | -1.51627500 |
| C | 4.13945700  | -0.59487700 | -5.33864000 |
| C | 0.77496400  | 4.33322600  | -4.04440700 |
| H | 5.20029900  | -0.43380600 | -5.57746200 |
| C | 3.82833300  | -0.29358200 | -2.83464200 |
| C | 3.99343800  | -1.13510600 | -3.93998100 |
| C | 4.05394000  | -2.51296000 | -3.69642000 |
| H | 1.39023200  | 4.27357600  | 0.52192900  |
| H | 1.81528200  | 2.77371300  | -0.32186100 |
| H | 0.93247400  | 2.78867200  | -5.54054200 |
| H | 2.26756500  | 3.93541000  | -5.56247500 |
| H | 3.92349600  | -0.32976300 | 0.58575900  |
| H | 2.69550300  | 0.57955500  | -0.28373300 |
| H | 3.73565600  | -1.29828000 | -6.07072900 |
| H | 3.61044000  | 0.35038900  | -5.46706200 |
| C | -0.30333300 | 5.20668000  | -3.88057200 |
| C | 3.70891200  | 0.17747300  | -0.35548800 |
| C | 1.44563300  | 3.90651500  | -2.89109600 |
| C | -1.92220500 | 6.53671300  | -2.46924100 |
| H | -1.87760300 | 7.12401100  | -1.54639300 |
| H | -2.01727400 | 7.22945100  | -3.31201400 |



|   |             |             |             |
|---|-------------|-------------|-------------|
| H | -2.84272300 | 5.93920300  | -2.43528400 |
| C | 3.93919900  | -4.52806800 | -2.17063400 |
| H | 4.52373800  | -4.81241700 | -1.28841600 |
| H | 2.90603300  | -4.85686200 | -1.99843000 |
| H | 4.32623800  | -5.08285500 | -3.03117300 |
| C | 6.01124300  | 1.80222300  | -3.22928900 |
| H | 6.33351300  | 1.16315800  | -2.39914700 |
| H | 6.25066100  | 1.27326400  | -4.15916600 |
| H | 6.60157700  | 2.72191000  | -3.20218100 |
| C | 4.33855200  | 4.70976800  | -3.23838900 |
| H | 3.94011100  | 5.19809200  | -4.13573700 |
| H | 4.01221300  | 5.30367600  | -2.37655400 |
| H | 5.42980600  | 4.75121200  | -3.28733900 |

### IM21

|    |             |             |             |
|----|-------------|-------------|-------------|
| Cu | 2.04060200  | -0.63212400 | -1.49472400 |
| I  | 1.99284200  | -3.19674500 | -1.82383500 |
| C  | -4.56335100 | -2.68321200 | -5.74664500 |
| H  | -5.35411400 | -2.51108500 | -5.00618400 |
| H  | -4.86933500 | -3.52918400 | -6.37233400 |
| H  | -4.51104100 | -1.79440400 | -6.38743100 |
| C  | -3.21976900 | -2.94878900 | -5.06325000 |
| H  | -3.28909700 | -3.85839900 | -4.45123700 |
| H  | -2.44974700 | -3.14680700 | -5.82135400 |
| C  | -2.76782100 | -1.78461700 | -4.17763500 |
| H  | -3.53175400 | -1.59209300 | -3.41272700 |
| H  | -2.68640100 | -0.86962900 | -4.77997900 |
| C  | -1.41593300 | -2.05803500 | -3.49490200 |
| H  | -0.63259700 | -2.21815700 | -4.23955900 |
| H  | -1.47920900 | -2.96020300 | -2.88559800 |
| O  | -0.26651400 | 0.01676400  | -3.18359000 |
| C  | -0.98541900 | -0.85630400 | -2.68087500 |
| B  | -0.41546500 | 0.03509300  | 0.70691400  |
| O  | 0.84627000  | -0.49990500 | 0.62781000  |
| C  | 1.18782900  | -1.05108400 | 1.94369300  |
| C  | 0.20445200  | -0.26116000 | 2.88649900  |
| O  | -0.89034300 | 0.08997900  | 1.98473000  |
| C  | -1.13014000 | 0.49751100  | -0.62829900 |
| H  | -0.33250600 | 0.95759600  | -1.21986800 |
| C  | -2.27231600 | 1.49774700  | -0.57770800 |
| C  | -2.82281400 | 1.93593800  | -1.79271400 |
| C  | -3.83375300 | 2.89363300  | -1.81630400 |
| C  | -4.31908000 | 3.43052600  | -0.61981600 |
| C  | -3.78752100 | 2.99152800  | 0.59192600  |

|   |             |             |             |
|---|-------------|-------------|-------------|
| C | -2.77107100 | 2.03166200  | 0.61452300  |
| H | -2.43991700 | 1.52763800  | -2.72267000 |
| H | -4.24238700 | 3.22393400  | -2.76761700 |
| H | -5.10852700 | 4.17683400  | -0.63481100 |
| H | -4.16768300 | 3.39040900  | 1.52897400  |
| H | -2.36649800 | 1.69460300  | 1.56066600  |
| C | -0.37465600 | -1.07308300 | 4.03842200  |
| H | 0.42314600  | -1.41554500 | 4.70637800  |
| H | -1.05952000 | -0.44651400 | 4.61821000  |
| H | -0.92874600 | -1.94163500 | 3.67882100  |
| C | 0.78163300  | 1.05773400  | 3.39893300  |
| H | 1.17113700  | 1.65754500  | 2.57437100  |
| H | -0.01184900 | 1.63007800  | 3.88971000  |
| H | 1.58452200  | 0.88706700  | 4.12327700  |
| C | 2.67088700  | -0.79818900 | 2.17775100  |
| H | 2.97285100  | -1.16321800 | 3.16555000  |
| H | 3.24532900  | -1.34100400 | 1.42030700  |
| H | 2.91845200  | 0.26185100  | 2.10455000  |
| C | 0.90812600  | -2.55118000 | 1.90686200  |
| H | 1.46274200  | -2.99906500 | 1.07928300  |
| H | 1.21968700  | -3.02251200 | 2.84478100  |
| H | -0.15330700 | -2.75345400 | 1.74941800  |
| N | -1.48959500 | -0.71277500 | -1.41286000 |
| C | -2.29712000 | -1.70197200 | -0.76028100 |
| C | -3.63771200 | -1.42572000 | -0.47047100 |
| C | -1.72973800 | -2.91955700 | -0.37081000 |
| C | -4.40601400 | -2.36904000 | 0.21240600  |
| H | -4.06690000 | -0.47984300 | -0.77891900 |
| C | -2.51010300 | -3.86349600 | 0.29683600  |
| H | -0.68911500 | -3.11968400 | -0.60883200 |
| C | -3.84605100 | -3.58898400 | 0.59594500  |
| H | -5.44606700 | -2.15092500 | 0.43767700  |
| H | -2.06650000 | -4.81166900 | 0.58715200  |
| H | -4.44933300 | -4.32336300 | 1.12219800  |
| C | 2.87962000  | 0.96983100  | -2.22680300 |
| N | 2.79583200  | 2.31498400  | -2.03568000 |
| C | 3.64002500  | 3.02569700  | -2.90221800 |
| C | 4.26765200  | 2.08863400  | -3.66804000 |
| N | 3.78424800  | 0.85038700  | -3.23539000 |
| H | 6.20950200  | 0.46653200  | -2.07178100 |
| C | 0.30533100  | 4.17560500  | 0.81556200  |
| C | 1.58164700  | 3.72350100  | 1.16644400  |
| H | 1.93364700  | 3.85890200  | 2.18624500  |
| C | 2.41810700  | 3.09563600  | 0.23937600  |

|   |             |             |             |
|---|-------------|-------------|-------------|
| C | 0.21662500  | 3.24407100  | -2.89472700 |
| H | -0.75886700 | 3.71707600  | -3.03177200 |
| C | 3.78711500  | 2.59329900  | 0.62270300  |
| H | 4.57558000  | 3.10408000  | 0.05626000  |
| H | 3.28731800  | -2.59404700 | -6.21169600 |
| C | 4.87103500  | -2.91225600 | -4.79257300 |
| C | 5.55909100  | -2.36670900 | -3.70556600 |
| H | 6.35636900  | -2.93843500 | -3.23691200 |
| H | -1.11642900 | 4.35189900  | -0.78908700 |
| C | 5.21997300  | -1.12046600 | -3.17898000 |
| C | 2.28300200  | -0.17596500 | -5.45250000 |
| C | 0.68635200  | 3.41197600  | -1.47267200 |
| H | 2.52279500  | 0.87376100  | -5.65984600 |
| C | 4.17350400  | -0.41777200 | -3.78714800 |
| C | 3.45954200  | -0.92334800 | -4.87986200 |
| C | 3.83712700  | -2.17340900 | -5.37323100 |
| H | 3.97746800  | 2.75384100  | 1.68783100  |
| H | 3.88750100  | 1.52458400  | 0.40702100  |
| H | 0.12517800  | 2.18404600  | -3.15248000 |
| H | 0.91994800  | 3.69227500  | -3.60600700 |
| H | 6.78019100  | -1.17247400 | -1.69330100 |
| H | 5.20875700  | -0.60826300 | -1.09505000 |
| H | 1.95172200  | -0.63953500 | -6.38657800 |
| H | 1.44190200  | -0.18070100 | -4.74794600 |
| C | -0.12314900 | 4.01559300  | -0.50603900 |
| C | 5.89872600  | -0.57733300 | -1.94810500 |
| C | 1.94501000  | 2.94266700  | -1.06911100 |
| C | -0.58972000 | 4.83665500  | 1.83411600  |
| H | -0.31316900 | 4.54958300  | 2.85389100  |
| H | -0.52472400 | 5.93080000  | 1.77027300  |
| H | -1.63530300 | 4.55921500  | 1.66917000  |
| C | 5.19393900  | -4.29980900 | -5.28649500 |
| H | 6.24550300  | -4.55439400 | -5.11662200 |
| H | 4.58457200  | -5.04053300 | -4.75297700 |
| H | 4.98245600  | -4.40757000 | -6.35567200 |
| C | 5.27458000  | 2.20632700  | -4.76014700 |
| H | 6.19628500  | 1.66666400  | -4.51346200 |
| H | 4.89650300  | 1.78448700  | -5.69853800 |
| H | 5.52816900  | 3.25526300  | -4.93490600 |
| C | 3.74886200  | 4.51174300  | -2.86593200 |
| H | 2.79009800  | 4.99607800  | -3.08405700 |
| H | 4.07184400  | 4.86711400  | -1.88003400 |
| H | 4.47717600  | 4.85506100  | -3.60526500 |

**IM22**

|    |             |             |             |
|----|-------------|-------------|-------------|
| Cu | -0.66213100 | -0.57030200 | 0.43406900  |
| C  | -0.70446400 | -2.08930200 | 1.60712500  |
| N  | -1.63289300 | -3.07732500 | 1.66182100  |
| C  | -1.33878200 | -4.01645800 | 2.65819400  |
| C  | -0.17991000 | -3.59502500 | 3.24376600  |
| N  | 0.18265800  | -2.41632600 | 2.58010500  |
| H  | 2.23200200  | -3.90750400 | 1.48821100  |
| C  | -4.99164000 | -3.21512200 | -0.88689700 |
| C  | -3.80292800 | -3.86286800 | -1.23776900 |
| H  | -3.74625700 | -4.39953500 | -2.18151200 |
| C  | -2.67667700 | -3.82715900 | -0.41253000 |
| C  | -3.98877000 | -1.66523800 | 2.46564400  |
| H  | -3.66131100 | -2.25982300 | 3.32632600  |
| C  | -1.38108300 | -4.48222600 | -0.81891900 |
| H  | -1.01155400 | -5.17275500 | -0.05184900 |
| H  | 2.29757400  | 0.93714000  | 4.87346600  |
| C  | 3.57913900  | -0.08108200 | 3.47656100  |
| C  | 3.64515600  | -1.09658200 | 2.51682200  |
| H  | 4.58138400  | -1.27716800 | 1.99448100  |
| H  | -5.95998500 | -2.00644900 | 0.60787000  |
| C  | 2.53290900  | -1.87892400 | 2.19901500  |
| C  | -0.09548000 | -0.33152000 | 4.51758800  |
| C  | -3.94416000 | -2.45739700 | 1.18372200  |
| H  | -0.51861400 | -1.22968400 | 4.98236700  |
| C  | 1.33947800  | -1.62316500 | 2.88547300  |
| C  | 1.22551500  | -0.61162400 | 3.84724600  |
| C  | 2.36435600  | 0.14506000  | 4.13182000  |
| H  | -1.50262400 | -5.03993600 | -1.75125300 |
| H  | -0.59977400 | -3.72807700 | -0.97202500 |
| H  | -5.00036300 | -1.30149600 | 2.66415100  |
| H  | -3.32051300 | -0.79778600 | 2.40418400  |
| H  | 3.61607400  | -3.06585000 | 0.76362400  |
| H  | 1.96076400  | -2.65795500 | 0.27617200  |
| H  | 0.01386500  | 0.43457600  | 5.28971300  |
| H  | -0.83011700 | 0.02424400  | 3.78533600  |
| C  | -5.04438000 | -2.52064100 | 0.32632200  |
| C  | 2.59321500  | -2.93746300 | 1.12737600  |
| C  | -2.77662400 | -3.12670600 | 0.79573300  |
| C  | -6.18189900 | -3.23260300 | -1.81423100 |
| H  | -6.17784300 | -4.12028900 | -2.45476500 |
| H  | -7.12419700 | -3.21654300 | -1.25676900 |
| H  | -6.17596600 | -2.35354800 | -2.47127500 |
| C  | 4.78450300  | 0.77773900  | 3.77078100  |

|   |             |             |             |
|---|-------------|-------------|-------------|
| H | 5.71624600  | 0.21616100  | 3.64689100  |
| H | 4.82669900  | 1.63593100  | 3.08792700  |
| H | 4.75549700  | 1.17273600  | 4.79130800  |
| C | 0.63919500  | -4.15924800 | 4.35325700  |
| H | 1.65468400  | -4.40144100 | 4.01845900  |
| H | 0.73455600  | -3.44830400 | 5.18220000  |
| H | 0.18061400  | -5.07312300 | 4.73917200  |
| C | -2.21478800 | -5.19388800 | 2.91689200  |
| H | -3.22970600 | -4.88448600 | 3.19254600  |
| H | -2.30240600 | -5.83146500 | 2.02950500  |
| H | -1.80973400 | -5.79887500 | 3.73201700  |
| I | -0.61731500 | 1.39739900  | -1.07622800 |

### IM23

|    |             |             |             |
|----|-------------|-------------|-------------|
| Cu | -0.80672800 | -0.83356600 | 0.11312300  |
| C  | -0.92406600 | -2.23621700 | 1.37336200  |
| N  | -1.86098700 | -3.19345000 | 1.60024600  |
| C  | -1.49109400 | -4.05242000 | 2.64505000  |
| C  | -0.27792400 | -3.61109400 | 3.08673800  |
| N  | 0.04174400  | -2.50278400 | 2.29394300  |
| H  | 1.94771800  | -4.14462800 | 1.15922600  |
| C  | -5.43627200 | -3.51562100 | -0.61462300 |
| C  | -4.27054100 | -4.15917900 | -1.04358800 |
| H  | -4.29040200 | -4.74465800 | -1.95964600 |
| C  | -3.07362000 | -4.06057000 | -0.33082800 |
| C  | -4.15545400 | -1.77144400 | 2.54249800  |
| H  | -3.77254800 | -2.32473300 | 3.40785500  |
| C  | -1.80618100 | -4.71364200 | -0.81976100 |
| H  | -1.34995000 | -5.34768200 | -0.05047900 |
| H  | 2.40582000  | 1.06238000  | 3.93153600  |
| C  | 3.51823500  | -0.12391100 | 2.52221700  |
| C  | 3.47764100  | -1.25004400 | 1.69420100  |
| H  | 4.34234100  | -1.49447800 | 1.08233700  |
| H  | -6.28774600 | -2.24682800 | 0.90088700  |
| C  | 2.34183000  | -2.05819500 | 1.61034600  |
| C  | -0.00746300 | -0.21276800 | 4.00407500  |
| C  | -4.21608200 | -2.63080700 | 1.30534300  |
| H  | -0.39924500 | -1.04666800 | 4.59757200  |
| C  | 1.23601200  | -1.71384600 | 2.39751500  |
| C  | 1.23336900  | -0.59477600 | 3.23939000  |
| C  | 2.39186700  | 0.18324600  | 3.29208900  |
| H  | -1.99931200 | -5.32917100 | -1.70248100 |
| H  | -1.06330600 | -3.95241600 | -1.08665100 |
| H  | -5.14496700 | -1.38138000 | 2.79565400  |

|   |             |             |             |
|---|-------------|-------------|-------------|
| H | -3.48078200 | -0.92135000 | 2.38534700  |
| H | 3.24987400  | -3.41133200 | 0.20084200  |
| H | 1.55341200  | -3.02059500 | -0.14040700 |
| H | 0.19082400  | 0.62604200  | 4.67652300  |
| H | -0.80121000 | 0.08508400  | 3.30810000  |
| C | -5.39086500 | -2.75858500 | 0.56042500  |
| C | 2.27519600  | -3.22554700 | 0.65984000  |
| C | -3.07569400 | -3.30018600 | 0.84544200  |
| C | -6.70695700 | -3.60631100 | -1.42401100 |
| H | -6.78957100 | -4.57209900 | -1.93338300 |
| H | -7.59288100 | -3.47448200 | -0.79455500 |
| H | -6.73450300 | -2.82663700 | -2.19607700 |
| C | 4.73239000  | 0.77112700  | 2.54378200  |
| H | 5.64842800  | 0.21060800  | 2.33092600  |
| H | 4.64400200  | 1.55695600  | 1.78262300  |
| H | 4.84998300  | 1.26598800  | 3.51329200  |
| C | 0.62880900  | -4.10102000 | 4.16282000  |
| H | 1.60973500  | -4.38275800 | 3.76222700  |
| H | 0.80122400  | -3.33153800 | 4.92462800  |
| H | 0.19783500  | -4.97644900 | 4.65535100  |
| C | -2.35366300 | -5.18766400 | 3.07804400  |
| H | -3.33446500 | -4.83994900 | 3.42334200  |
| H | -2.53316800 | -5.89130400 | 2.25667800  |
| H | -1.87910300 | -5.73415500 | 3.89708900  |
| O | -0.61740900 | 0.51057300  | -1.07566300 |
| C | 0.50315700  | 1.34462700  | -1.13437100 |
| C | 1.77280100  | 0.53315700  | -1.47190100 |
| H | 1.98119100  | -0.18450500 | -0.66880900 |
| H | 1.61389500  | -0.02750300 | -2.40021700 |
| H | 2.65765700  | 1.17254200  | -1.59657100 |
| C | 0.25133700  | 2.38347500  | -2.24401000 |
| H | -0.65349000 | 2.95650600  | -2.01308900 |
| H | 1.09018600  | 3.08284800  | -2.35712400 |
| H | 0.09167300  | 1.87086200  | -3.19904300 |
| C | 0.71874000  | 2.07359500  | 0.20973900  |
| H | -0.19085900 | 2.62252000  | 0.47968900  |
| H | 0.92581600  | 1.34331200  | 1.00156000  |
| H | 1.55667000  | 2.78350900  | 0.17161000  |

**TS16**

|   |             |             |             |
|---|-------------|-------------|-------------|
| B | -4.37667000 | -4.22961000 | -2.04177700 |
| C | -4.97211600 | -5.89934400 | -0.56227300 |
| C | -4.34293700 | -7.20497000 | -1.05682900 |
| H | -5.00859900 | -8.05885900 | -0.89191600 |

|   |             |             |             |
|---|-------------|-------------|-------------|
| H | -3.41532200 | -7.38535200 | -0.50740500 |
| H | -4.09813300 | -7.13774900 | -2.12041200 |
| C | -6.21562800 | -5.46930900 | -1.40598400 |
| C | -7.12992900 | -4.48425500 | -0.66504000 |
| H | -7.70231400 | -4.97726700 | 0.12872500  |
| H | -7.83451600 | -4.05158000 | -1.38239500 |
| H | -6.54588200 | -3.67086800 | -0.22482900 |
| C | -7.03321600 | -6.61258400 | -1.99567000 |
| H | -7.86730400 | -6.20640600 | -2.57715800 |
| H | -7.44714900 | -7.24752500 | -1.20346300 |
| H | -6.42727800 | -7.23154400 | -2.66051100 |
| C | -5.20603000 | -5.96000100 | 0.94294100  |
| H | -5.52540500 | -4.99270600 | 1.33373200  |
| H | -4.27389200 | -6.23709700 | 1.44639500  |
| H | -5.96364600 | -6.71257800 | 1.19194000  |
| O | -5.60127400 | -4.72971700 | -2.48921100 |
| O | -4.03410000 | -4.82530200 | -0.83655100 |
| B | -2.69972800 | -3.89840900 | -3.60415700 |
| C | -0.99561400 | -5.38672000 | -3.06029500 |
| C | -1.05798900 | -5.83715000 | -1.59818600 |
| H | -0.05339000 | -5.96704600 | -1.18039900 |
| H | -1.57173100 | -6.79992800 | -1.54962100 |
| H | -1.62218100 | -5.12833500 | -0.99004100 |
| C | -0.42713200 | -3.93016100 | -3.21780100 |
| C | 0.13828700  | -3.65746100 | -4.62021100 |
| H | 1.07054100  | -4.20416500 | -4.80039000 |
| H | 0.34252900  | -2.58627900 | -4.71478000 |
| H | -0.58804000 | -3.92816500 | -5.39065800 |
| C | 0.59248800  | -3.52005800 | -2.15977700 |
| H | 0.90820600  | -2.48568600 | -2.33487200 |
| H | 1.48243800  | -4.15863400 | -2.20415700 |
| H | 0.16784400  | -3.58088700 | -1.15576800 |
| C | -0.26565800 | -6.44126900 | -3.89138100 |
| H | -0.31302400 | -6.21103100 | -4.95789700 |
| H | -0.73555800 | -7.41786800 | -3.73559800 |
| H | 0.78685100  | -6.51864000 | -3.59306900 |
| O | -1.60764200 | -3.12503500 | -3.05663800 |
| O | -2.33550600 | -5.27033100 | -3.58152000 |
| C | -3.71260000 | -3.37217000 | -7.07070300 |
| C | -4.23222900 | -3.76875300 | -5.68305900 |
| H | -3.51279800 | -2.29740900 | -7.09666400 |
| H | -2.77995200 | -3.90241300 | -7.29319700 |
| H | -4.44587200 | -3.61706000 | -7.84845400 |
| C | -4.44292000 | -5.28546500 | -5.61273200 |

|    |             |             |             |
|----|-------------|-------------|-------------|
| C  | -5.54441700 | -3.03074800 | -5.38035300 |
| H  | -4.84040400 | -5.57653600 | -4.63901400 |
| H  | -5.16123600 | -5.58554100 | -6.38553400 |
| H  | -3.50322000 | -5.81747700 | -5.77735200 |
| H  | -6.31162500 | -3.28685600 | -6.12174000 |
| H  | -5.91390400 | -3.31167800 | -4.39078000 |
| H  | -5.37851800 | -1.94942300 | -5.41394000 |
| O  | -3.23118900 | -3.29451400 | -4.76768400 |
| Cu | -3.96844900 | -2.31406700 | -2.56900500 |
| C  | -4.06492700 | -0.41698300 | -2.19800900 |
| N  | -4.07334100 | 0.07132600  | -0.93149700 |
| C  | -3.96205600 | 1.46625400  | -0.90532300 |
| C  | -3.89003000 | 1.86108400  | -2.21078800 |
| N  | -3.96103000 | 0.68829500  | -2.97526500 |
| H  | -1.34451000 | 0.75362300  | -3.35469900 |
| C  | -4.31030300 | -2.52611700 | 2.38628500  |
| C  | -3.08318000 | -2.26867800 | 1.76755100  |
| H  | -2.18766800 | -2.76600000 | 2.13202200  |
| C  | -2.97493300 | -1.40638900 | 0.67528300  |
| C  | -6.65222100 | -0.45078400 | 0.18788500  |
| H  | -6.59844200 | 0.64056800  | 0.10362800  |
| C  | -1.65907300 | -1.20332400 | -0.03026100 |
| H  | -1.49185400 | -0.15287100 | -0.29291300 |
| H  | -5.91161500 | 0.89324700  | -7.11422300 |
| C  | -3.79721700 | 0.49483900  | -7.18628700 |
| C  | -2.64595300 | 0.29911800  | -6.41792300 |
| H  | -1.70363000 | 0.08163500  | -6.91466600 |
| H  | -6.42294800 | -2.11805500 | 2.33629500  |
| C  | -2.67134800 | 0.35321400  | -5.02163700 |
| C  | -6.39610900 | 1.02899400  | -4.43134100 |
| C  | -5.40068100 | -1.04121400 | 0.78620100  |
| H  | -6.37817700 | 1.90324000  | -3.77012900 |
| C  | -3.89930000 | 0.63050100  | -4.40802000 |
| C  | -5.08021000 | 0.82037100  | -5.13748900 |
| C  | -5.00493700 | 0.75509700  | -6.53034500 |
| H  | -0.82825300 | -1.53872100 | 0.59740200  |
| H  | -1.63376000 | -1.78006900 | -0.96321200 |
| H  | -7.52899500 | -0.70419800 | 0.79018800  |
| H  | -6.80907200 | -0.84087200 | -0.82536400 |
| H  | -0.53826000 | 0.16857500  | -4.82523700 |
| H  | -1.46906900 | -0.95149000 | -3.81202200 |
| H  | -7.20679900 | 1.16430000  | -5.15236900 |
| H  | -6.63613000 | 0.16164500  | -3.80464300 |
| C  | -5.45814900 | -1.90878300 | 1.88055800  |



|   |             |             |             |
|---|-------------|-------------|-------------|
| C | -1.43625800 | 0.07172200  | -4.20741300 |
| C | -4.14773000 | -0.79090300 | 0.21487000  |
| C | -4.38563300 | -3.45042700 | 3.57684300  |
| H | -3.97817500 | -2.97174000 | 4.47670400  |
| H | -5.41846600 | -3.73972500 | 3.79402300  |
| H | -3.80814900 | -4.36463900 | 3.40354200  |
| C | -3.74652600 | 0.37371800  | -8.68937600 |
| H | -2.79851600 | 0.74762100  | -9.09024900 |
| H | -3.83806200 | -0.67672700 | -8.99483000 |
| H | -4.56227200 | 0.92755600  | -9.16492100 |
| C | -3.73330800 | 3.20500200  | -2.83505000 |
| H | -2.81345500 | 3.26234200  | -3.42879000 |
| H | -4.56607200 | 3.43909600  | -3.50828700 |
| H | -3.69099800 | 3.97975400  | -2.06506700 |
| C | -3.91800100 | 2.23400800  | 0.37102800  |
| H | -4.82767900 | 2.08350600  | 0.96408100  |
| H | -3.07176800 | 1.92146300  | 0.99412700  |
| H | -3.81640900 | 3.30361100  | 0.16994400  |

**TS13'**

|    |             |             |             |
|----|-------------|-------------|-------------|
| Cu | 0.10248400  | 0.02049300  | 0.66958300  |
| B  | -1.59028600 | -2.27239500 | 0.05899800  |
| O  | -2.42131500 | -1.32771600 | -0.53069200 |
| C  | -3.65243500 | -2.00923100 | -0.87744400 |
| C  | -3.22889500 | -3.52797400 | -0.84101000 |
| O  | -2.15898700 | -3.52142400 | 0.14008400  |
| C  | -2.61553300 | -4.01513800 | -2.15848400 |
| H  | -2.15562300 | -4.99249100 | -1.99155400 |
| H  | -3.37164300 | -4.10685400 | -2.94554100 |
| H  | -1.82295500 | -3.34304300 | -2.49859600 |
| C  | -4.31421100 | -4.48676900 | -0.36840600 |
| H  | -5.17502000 | -4.46387600 | -1.04641900 |
| H  | -3.91768400 | -5.50648300 | -0.35544600 |
| H  | -4.65505100 | -4.24285200 | 0.64052900  |
| C  | -4.11734600 | -1.51190000 | -2.24162700 |
| H  | -5.01034300 | -2.05515000 | -2.57096600 |
| H  | -4.36382600 | -0.44799300 | -2.17851300 |
| H  | -3.33448400 | -1.63431300 | -2.99276400 |
| C  | -4.67608100 | -1.64381100 | 0.20193700  |
| H  | -4.76967200 | -0.55420400 | 0.24570900  |
| H  | -5.66263400 | -2.06834800 | -0.01112100 |
| H  | -4.34881000 | -1.99827600 | 1.18430400  |
| C  | 0.46217500  | -2.07857200 | -0.73667100 |
| H  | 0.26113200  | -1.27548800 | -1.43748100 |

|   |             |             |             |
|---|-------------|-------------|-------------|
| C | 0.87302100  | -3.34860300 | -1.24679800 |
| C | 1.40262100  | -3.42348500 | -2.56762000 |
| C | 1.80977700  | -4.62410800 | -3.12783100 |
| C | 1.72055700  | -5.82409700 | -2.40785400 |
| C | 1.20458800  | -5.77551600 | -1.11136500 |
| C | 0.79155600  | -4.57703500 | -0.53446700 |
| H | 1.48507100  | -2.50380000 | -3.14510300 |
| H | 2.20323700  | -4.62894000 | -4.14288400 |
| H | 2.04353700  | -6.76357400 | -2.84716500 |
| H | 1.11547600  | -6.69193300 | -0.53052200 |
| H | 0.36739800  | -4.59312000 | 0.46140900  |
| N | -0.26724900 | -1.91349400 | 0.55291800  |
| C | 0.29191800  | -2.39064900 | 1.77901400  |
| C | 1.66491100  | -2.65003900 | 1.89379200  |
| C | -0.54063400 | -2.56490200 | 2.89546500  |
| C | 2.18972400  | -3.06457700 | 3.11671700  |
| H | 2.28787600  | -2.54057200 | 1.01411300  |
| C | -0.00367000 | -2.97909400 | 4.11098300  |
| H | -1.60780500 | -2.38404300 | 2.79685400  |
| C | 1.36671300  | -3.23408300 | 4.23122400  |
| H | 3.25382400  | -3.27416400 | 3.18947000  |
| H | -0.66102500 | -3.11276300 | 4.96640400  |
| H | 1.78038400  | -3.57568300 | 5.17600900  |
| C | 0.20570700  | 1.84951300  | 1.10047200  |
| N | 0.88581100  | 2.39389900  | 2.13998600  |
| C | 0.62691100  | 3.76381600  | 2.26828200  |
| C | -0.24315400 | 4.08058900  | 1.26396400  |
| N | -0.47966400 | 2.88974800  | 0.56428700  |
| H | 0.82819800  | 4.25536200  | -1.53520500 |
| C | 3.29194400  | 0.00159400  | 4.64684500  |
| C | 3.85606300  | 0.70809800  | 3.58174500  |
| H | 4.92211400  | 0.62033200  | 3.38767000  |
| C | 3.08073700  | 1.51245900  | 2.74210300  |
| C | -0.39026800 | 0.95461200  | 4.27216900  |
| H | -0.77699100 | 1.97831500  | 4.21929700  |
| C | 3.68366800  | 2.22018400  | 1.55498400  |
| H | 3.48772800  | 3.29866700  | 1.57301600  |
| H | -4.57384900 | 1.87832600  | -1.22434700 |
| C | -3.10387900 | 2.40334900  | -2.70492800 |
| C | -1.77548000 | 2.79245800  | -2.90757200 |
| H | -1.41663000 | 2.95933100  | -3.92018100 |
| H | 1.46040700  | -0.45588600 | 5.67798700  |
| C | -0.89059700 | 2.96278000  | -1.84074100 |
| C | -3.15751200 | 1.99385700  | 1.09445700  |

|   |             |             |             |
|---|-------------|-------------|-------------|
| C | 1.10121000  | 0.90147500  | 4.06152000  |
| H | -2.78694500 | 2.70728000  | 1.83779000  |
| C | -1.37602300 | 2.73589100  | -0.54630400 |
| C | -2.69283800 | 2.32745800  | -0.29925800 |
| C | -3.54460100 | 2.18358600  | -1.39674600 |
| H | 4.76636200  | 2.07210700  | 1.52308500  |
| H | 3.25958400  | 1.83479300  | 0.61976400  |
| H | -0.65917800 | 0.53050100  | 5.24312000  |
| H | -0.90483800 | 0.37198600  | 3.49882800  |
| H | 0.75191200  | 3.48903400  | -3.13165300 |
| H | 1.21901000  | 2.54636900  | -1.70385200 |
| H | -4.24982800 | 1.97406600  | 1.14699700  |
| H | -2.78820600 | 1.00128700  | 1.37971700  |
| C | 1.91590700  | 0.11183700  | 4.87211000  |
| C | 0.55232600  | 3.33739000  | -2.06757900 |
| C | 1.71049200  | 1.60258300  | 3.01035500  |
| C | 4.13397300  | -0.89623600 | 5.51729800  |
| H | 3.94145000  | -0.71829900 | 6.58145900  |
| H | 3.90031500  | -1.94852400 | 5.31673000  |
| H | 5.20244800  | -0.74750900 | 5.33450800  |
| C | -4.02974300 | 2.18170700  | -3.87527000 |
| H | -4.01053300 | 1.13030100  | -4.18986300 |
| H | -5.06594500 | 2.42578000  | -3.61876400 |
| H | -3.73850000 | 2.78817900  | -4.73868900 |
| C | -0.90036900 | 5.36275500  | 0.88446300  |
| H | -0.63099500 | 5.66954200  | -0.13296900 |
| H | -1.99264900 | 5.27502000  | 0.91618400  |
| H | -0.60209400 | 6.16051200  | 1.56936500  |
| C | 1.23861200  | 4.58412700  | 3.35130700  |
| H | 0.99174200  | 4.18206600  | 4.34067000  |
| H | 2.33205400  | 4.60310400  | 3.27483700  |
| H | 0.87682000  | 5.61421800  | 3.30090700  |

#### TS17<sup>OSS</sup>

|    |             |             |             |
|----|-------------|-------------|-------------|
| Cu | 0.22108800  | 0.02335400  | -0.22767200 |
| C  | 0.18880100  | -1.94284600 | 0.22094100  |
| N  | -0.89381600 | -2.73630500 | 0.45916400  |
| C  | -0.52793300 | -4.04623000 | 0.80134600  |
| C  | 0.83331000  | -4.06769800 | 0.79644100  |
| N  | 1.24289400  | -2.77513300 | 0.44094500  |
| B  | -2.38565500 | 1.37987700  | -0.89784400 |
| O  | -1.27073400 | 0.99377000  | -1.63017600 |
| C  | -1.33329800 | 1.71605400  | -2.90221300 |
| C  | -2.88355900 | 1.89844900  | -3.06479300 |

|   |             |             |             |
|---|-------------|-------------|-------------|
| O | -3.33562000 | 1.98990100  | -1.68513000 |
| C | -1.17062600 | 0.85890000  | 1.16903800  |
| H | -1.27751000 | 0.01450000  | 1.84489300  |
| C | -0.41201300 | 1.96713400  | 1.72907600  |
| C | 0.50662100  | 1.73376400  | 2.78176000  |
| C | 1.21843000  | 2.77356800  | 3.36293400  |
| C | 1.05360400  | 4.08757100  | 2.90607400  |
| C | 0.14152900  | 4.33901600  | 1.87414500  |
| C | -0.57523100 | 3.30248200  | 1.29133100  |
| H | 0.62597000  | 0.71905200  | 3.15217900  |
| H | 1.90751200  | 2.56377900  | 4.17650500  |
| H | 1.61391300  | 4.90078100  | 3.35633800  |
| H | -0.00613300 | 5.35595400  | 1.52052400  |
| H | -1.29669300 | 3.51503600  | 0.50989800  |
| H | 2.08475100  | -0.67930700 | 2.52852500  |
| C | -4.94445600 | -1.69269300 | -0.11254700 |
| C | -4.40353300 | -1.74276700 | 1.17076000  |
| H | -5.02894300 | -1.49056300 | 2.02258800  |
| C | -3.06162300 | -2.07297700 | 1.39219300  |
| C | -1.87059200 | -2.58055100 | -2.21366900 |
| H | -2.45726300 | -2.65545800 | -3.13382800 |
| C | -2.52958600 | -2.13269800 | 2.80259500  |
| H | -1.43802200 | -2.09124900 | 2.83250200  |
| H | 5.03272700  | -2.58077900 | -2.11363100 |
| C | 5.32986100  | -1.87892500 | -0.10141000 |
| C | 4.71083300  | -1.64965500 | 1.12961100  |
| H | 5.29117300  | -1.23619300 | 1.94938800  |
| H | -4.52168000 | -1.94021000 | -2.20761700 |
| C | 3.35507700  | -1.91776400 | 1.32997300  |
| C | 2.37226700  | -3.17072200 | -2.14712900 |
| C | -2.76307400 | -2.29093200 | -1.03331500 |
| H | 1.68028300  | -2.37546300 | -2.45070600 |
| C | 2.62848000  | -2.44176700 | 0.25752900  |
| C | 3.21070100  | -2.69239800 | -0.99101400 |
| C | 4.56801300  | -2.41087500 | -1.14557900 |
| H | -2.84027500 | -3.05846200 | 3.30459200  |
| H | -2.92410500 | -1.29561100 | 3.38599900  |
| H | -1.12599100 | -1.78797200 | -2.34156000 |
| H | -1.31832900 | -3.51805100 | -2.08239600 |
| H | 2.00929500  | -2.38663500 | 2.96972800  |
| H | 3.42411100  | -1.41182300 | 3.42325300  |
| H | 1.76925600  | -4.04957500 | -1.89094400 |
| H | 3.00009500  | -3.42159900 | -3.00647100 |
| C | -4.10949100 | -1.97049500 | -1.20224900 |

|   |             |             |             |
|---|-------------|-------------|-------------|
| C | 2.68423100  | -1.59003800 | 2.63768200  |
| C | -2.25923600 | -2.33765100 | 0.27715700  |
| C | -6.39567400 | -1.34747800 | -0.33435000 |
| H | -6.86171600 | -0.98880700 | 0.58662400  |
| H | -6.96081000 | -2.21918300 | -0.68851700 |
| H | -6.50136100 | -0.56171200 | -1.09104100 |
| C | 6.77593200  | -1.50779100 | -0.31554100 |
| H | 7.26289800  | -2.17726700 | -1.03254700 |
| H | 7.34176700  | -1.53607800 | 0.62124500  |
| H | 6.85232700  | -0.48826800 | -0.71519900 |
| C | -3.57069400 | 0.68014800  | -3.68385700 |
| H | -4.65368500 | 0.78381100  | -3.56369100 |
| H | -3.25845400 | -0.23754800 | -3.18259300 |
| H | -3.34663500 | 0.59253400  | -4.75156300 |
| C | -3.30384300 | 3.17129900  | -3.78899400 |
| H | -2.91162500 | 3.17908000  | -4.81190700 |
| H | -2.94765600 | 4.06286700  | -3.26980100 |
| H | -4.39597100 | 3.22089000  | -3.84186900 |
| C | -0.59405400 | 3.04086800  | -2.70503500 |
| H | -1.08161600 | 3.65648700  | -1.94263100 |
| H | -0.55578900 | 3.61122100  | -3.63861100 |
| H | 0.42600300  | 2.83024900  | -2.37716600 |
| C | -0.65856500 | 0.87790100  | -3.97723800 |
| H | -1.09229500 | -0.12234700 | -4.03849300 |
| H | 0.40545800  | 0.78048600  | -3.74540200 |
| H | -0.76065500 | 1.36370000  | -4.95421800 |
| N | -2.42247500 | 1.19122500  | 0.50887100  |
| C | -3.56296800 | 1.38883900  | 1.32546400  |
| C | -3.44506800 | 1.41552400  | 2.72626600  |
| C | -4.84718100 | 1.53041500  | 0.76659800  |
| C | -4.57557400 | 1.54055600  | 3.53479000  |
| H | -2.46934600 | 1.35255200  | 3.18877200  |
| C | -5.96448000 | 1.66853000  | 1.58319600  |
| H | -4.96370800 | 1.52338800  | -0.30780500 |
| C | -5.84632600 | 1.66088000  | 2.97542300  |
| H | -4.45038600 | 1.55523500  | 4.61442600  |
| H | -6.94267100 | 1.77472100  | 1.12092100  |
| H | -6.72367700 | 1.76287100  | 3.60724500  |
| C | 1.80814100  | -5.15609300 | 1.09024600  |
| H | 2.45857000  | -4.89301600 | 1.93247900  |
| H | 2.45996900  | -5.35418700 | 0.23205400  |
| H | 1.28060100  | -6.07981800 | 1.34191900  |
| C | -1.53212500 | -5.11493900 | 1.06719700  |
| H | -1.03124200 | -6.07629700 | 1.20796200  |

|   |             |             |             |
|---|-------------|-------------|-------------|
| H | -2.23484900 | -5.21440500 | 0.23215900  |
| H | -2.12431300 | -4.90725500 | 1.96545400  |
| I | 2.44552400  | 0.88852300  | -1.37021700 |
| C | 5.97851200  | 1.58547800  | 2.25152400  |
| H | 6.53161500  | 1.18980500  | 1.39081200  |
| H | 6.53379600  | 2.45241800  | 2.63170600  |
| H | 5.98856600  | 0.81797400  | 3.03499000  |
| C | 4.55141500  | 1.96645100  | 1.85549700  |
| H | 3.99424500  | 2.30150800  | 2.73960500  |
| H | 4.02401300  | 1.08907800  | 1.46561000  |
| C | 4.50411100  | 3.06717900  | 0.79037700  |
| H | 5.02361200  | 3.96634300  | 1.17365500  |
| H | 5.09505400  | 2.75252200  | -0.08500900 |
| C | 3.12273700  | 3.42039100  | 0.36269300  |
| H | 2.25880400  | 3.04423800  | 0.88402600  |
| H | 2.95812000  | 4.14057000  | -0.43164300 |

#### IM24

|    |             |             |             |
|----|-------------|-------------|-------------|
| Cu | 0.26775000  | -0.22810800 | -0.81315900 |
| C  | 0.04274800  | -1.97780200 | 0.07007900  |
| N  | -1.02706400 | -2.82026900 | 0.03906000  |
| C  | -0.72424100 | -4.09193500 | 0.54854900  |
| C  | 0.58164300  | -4.03942700 | 0.93065900  |
| N  | 1.02090100  | -2.74355700 | 0.63464200  |
| B  | -2.32783800 | 1.73045200  | -0.36031700 |
| O  | -1.54281400 | 1.22054700  | -1.36724800 |
| C  | -1.95336000 | 1.88645700  | -2.61228900 |
| C  | -3.41552900 | 2.35427200  | -2.25598800 |
| O  | -3.36403700 | 2.50330800  | -0.80626000 |
| C  | -0.71854800 | 1.14476300  | 1.38612600  |
| H  | -0.59541000 | 0.31206200  | 2.06991300  |
| C  | 0.40450900  | 1.93964200  | 1.02915000  |
| C  | 1.71633300  | 1.45647800  | 1.29213200  |
| C  | 2.83495700  | 2.18076600  | 0.91846200  |
| C  | 2.69635100  | 3.41605000  | 0.27539500  |
| C  | 1.41395800  | 3.92416500  | 0.03253400  |
| C  | 0.28606800  | 3.21110200  | 0.40592700  |
| H  | 1.83592800  | 0.48783700  | 1.75740400  |
| H  | 3.82107900  | 1.76552600  | 1.10373200  |
| H  | 3.57361400  | 3.97335800  | -0.03754400 |
| H  | 1.29823700  | 4.88992500  | -0.45185500 |
| H  | -0.70007300 | 3.63373900  | 0.24483100  |
| H  | 0.71121500  | -1.37493700 | 2.88929400  |
| C  | -4.90761000 | -1.97117500 | -1.36549700 |

|   |             |             |             |
|---|-------------|-------------|-------------|
| C | -4.60511000 | -1.87263200 | -0.00396900 |
| H | -5.38305500 | -1.59165400 | 0.70035200  |
| C | -3.31838100 | -2.12411600 | 0.47993500  |
| C | -1.47033000 | -2.87115000 | -2.79508200 |
| H | -1.86519100 | -3.00237800 | -3.80625100 |
| C | -3.00433700 | -2.03499500 | 1.95170500  |
| H | -2.11366000 | -1.42498400 | 2.12443700  |
| H | 5.30032800  | -1.93307200 | -0.76611900 |
| C | 4.93437400  | -1.30413600 | 1.25933500  |
| C | 3.99268800  | -1.27092100 | 2.29193100  |
| H | 4.26642900  | -0.84147300 | 3.25271200  |
| H | -4.09991600 | -2.35191400 | -3.32401700 |
| C | 2.69590300  | -1.76213200 | 2.11449300  |
| C | 2.91249100  | -3.02742600 | -1.49421800 |
| C | -2.57726600 | -2.54620100 | -1.82492100 |
| H | 2.22358100  | -2.37839400 | -2.04437100 |
| C | 2.36167400  | -2.28641500 | 0.86031100  |
| C | 3.29138300  | -2.39221700 | -0.18314700 |
| C | 4.57242600  | -1.88514600 | 0.03945400  |
| H | -2.80217200 | -3.02413200 | 2.38097600  |
| H | -3.83221100 | -1.58432900 | 2.50238400  |
| H | -0.72271700 | -2.06937500 | -2.82017300 |
| H | -0.93990300 | -3.78673600 | -2.50918500 |
| H | 1.53279400  | -2.71737400 | 3.67513700  |
| H | 2.02512700  | -1.05808100 | 4.03819200  |
| H | 2.42340400  | -3.99748000 | -1.34529600 |
| H | 3.79627300  | -3.17701400 | -2.11974000 |
| C | -3.88179000 | -2.29643200 | -2.26015400 |
| C | 1.68859300  | -1.72279900 | 3.23765400  |
| C | -2.32696600 | -2.47023200 | -0.44832200 |
| C | -6.31370300 | -1.73145300 | -1.85878400 |
| H | -6.82855500 | -0.98518400 | -1.24486600 |
| H | -6.90840300 | -2.65341700 | -1.82029100 |
| H | -6.31894300 | -1.38061500 | -2.89552600 |
| C | 6.30810600  | -0.70760100 | 1.44466200  |
| H | 7.08296600  | -1.33845400 | 0.99550600  |
| H | 6.54826900  | -0.57271900 | 2.50401900  |
| H | 6.37282000  | 0.27566900  | 0.96123100  |
| C | -4.47876600 | 1.29675000  | -2.54614300 |
| H | -5.42926000 | 1.61616800  | -2.10700500 |
| H | -4.20085100 | 0.33765100  | -2.10798600 |
| H | -4.62455400 | 1.15796900  | -3.62200400 |
| C | -3.82288300 | 3.69340300  | -2.85788600 |
| H | -3.80272500 | 3.64277700  | -3.95191700 |

|   |             |             |             |
|---|-------------|-------------|-------------|
| H | -3.16258500 | 4.49932700  | -2.53337500 |
| H | -4.84250500 | 3.93978500  | -2.54564900 |
| C | -0.99383800 | 3.05114700  | -2.85006900 |
| H | -1.07508900 | 3.80434800  | -2.06243700 |
| H | -1.20523300 | 3.53044900  | -3.81153000 |
| H | 0.03114500  | 2.67501700  | -2.85998200 |
| C | -1.86061600 | 0.87124400  | -3.74196400 |
| H | -2.42864000 | -0.03250800 | -3.51133500 |
| H | -0.81290700 | 0.59757800  | -3.89211300 |
| H | -2.24586200 | 1.30393300  | -4.67227800 |
| N | -2.04113000 | 1.45999500  | 1.02651300  |
| C | -3.04512600 | 1.36780800  | 2.02101200  |
| C | -2.69912100 | 1.44219400  | 3.37921800  |
| C | -4.38990500 | 1.14775500  | 1.67608100  |
| C | -3.66870000 | 1.26921200  | 4.36594700  |
| H | -1.67127500 | 1.65137300  | 3.65560600  |
| C | -5.35162500 | 0.99263600  | 2.66928700  |
| H | -4.67296300 | 1.09171300  | 0.63362700  |
| C | -5.00056800 | 1.03879400  | 4.02169000  |
| H | -3.37772600 | 1.32817300  | 5.41119700  |
| H | -6.38626400 | 0.82418400  | 2.38168400  |
| H | -5.75486000 | 0.90814800  | 4.79174900  |
| C | 1.48434300  | -5.06754000 | 1.52144400  |
| H | 1.83942100  | -4.77317200 | 2.51586100  |
| H | 2.37065600  | -5.22476600 | 0.89652600  |
| H | 0.96086000  | -6.02211600 | 1.61857800  |
| C | -1.71655900 | -5.20393600 | 0.56431200  |
| H | -1.25337000 | -6.11739500 | 0.94630600  |
| H | -2.09727300 | -5.41050000 | -0.44274600 |
| H | -2.58301600 | -4.97447400 | 1.19499100  |
| I | 1.99509100  | 0.49593500  | -2.63719500 |

## IM25

|    |            |             |             |
|----|------------|-------------|-------------|
| Cu | 5.65633700 | -2.11020200 | -0.83138400 |
| B  | 3.68853300 | -4.50390800 | -2.16008900 |
| O  | 2.52947900 | -5.07829900 | -2.63154800 |
| C  | 1.52719300 | -4.87757000 | -1.59168200 |
| C  | 2.40746500 | -4.69988600 | -0.29760900 |
| O  | 3.63531000 | -4.16206200 | -0.83966100 |
| C  | 2.77395300 | -6.01945000 | 0.38703000  |
| H  | 3.56941600 | -5.81684600 | 1.10953500  |
| H  | 1.91642900 | -6.45496700 | 0.91059300  |
| H  | 3.14577500 | -6.75158200 | -0.33751300 |
| C  | 1.86640100 | -3.70680700 | 0.72185700  |



|   |             |             |             |
|---|-------------|-------------|-------------|
| H | 0.90322300  | -4.04442600 | 1.12218300  |
| H | 2.58406500  | -3.61868700 | 1.54170900  |
| H | 1.74220800  | -2.71903300 | 0.27553800  |
| C | 0.60171300  | -6.08720100 | -1.57776300 |
| H | -0.13047100 | -6.00123100 | -0.76698800 |
| H | 0.05648800  | -6.14646600 | -2.52518300 |
| H | 1.15935700  | -7.01690800 | -1.44787200 |
| C | 0.74950500  | -3.61026100 | -1.96544600 |
| H | 0.31213200  | -3.74540700 | -2.96027900 |
| H | -0.06282400 | -3.42023100 | -1.25617300 |
| H | 1.40803300  | -2.73887200 | -1.99146200 |
| C | 6.02056400  | -3.70475200 | -2.23687500 |
| H | 6.63938200  | -3.16309200 | -2.94637900 |
| C | 6.87771700  | -4.60411800 | -1.43129100 |
| C | 8.20602700  | -4.21137200 | -1.18878300 |
| C | 9.06313300  | -5.00696400 | -0.43965400 |
| C | 8.61373300  | -6.22600900 | 0.07334500  |
| C | 7.30275500  | -6.63542400 | -0.17731200 |
| C | 6.44045400  | -5.83424500 | -0.91959500 |
| H | 8.55700300  | -3.25933600 | -1.57532500 |
| H | 10.08121400 | -4.67584800 | -0.25826600 |
| H | 9.27886000  | -6.85167200 | 0.66187400  |
| H | 6.94517400  | -7.58263600 | 0.21710600  |
| H | 5.42341300  | -6.15802900 | -1.09758600 |
| N | 4.88436100  | -4.27456100 | -2.91806400 |
| C | 4.93875100  | -4.30201100 | -4.33168000 |
| C | 6.16849700  | -4.49719800 | -4.98590300 |
| C | 3.79031400  | -4.08112600 | -5.11298800 |
| C | 6.25139900  | -4.43265900 | -6.37560600 |
| H | 7.05442000  | -4.72245900 | -4.40155000 |
| C | 3.88274400  | -4.03689600 | -6.50259100 |
| H | 2.83569500  | -3.94025100 | -4.62429600 |
| C | 5.11204600  | -4.19509200 | -7.14601400 |
| H | 7.21370800  | -4.58530500 | -6.85701100 |
| H | 2.98277900  | -3.85944900 | -7.08570000 |
| H | 5.17820000  | -4.14807000 | -8.22892500 |
| I | 5.84239600  | -3.19975900 | 1.66578400  |
| C | 4.43924700  | 0.28586400  | -7.22859100 |
| H | 4.02468900  | -0.66823200 | -7.57451900 |
| H | 5.00025900  | 0.73095700  | -8.05795000 |
| H | 3.59800600  | 0.95084800  | -6.99685100 |
| C | 5.32738700  | 0.06920600  | -6.00097700 |
| H | 6.16114800  | -0.59403000 | -6.26982200 |
| H | 5.77805700  | 1.02354000  | -5.69091400 |

|   |             |             |             |
|---|-------------|-------------|-------------|
| C | 4.55706100  | -0.54773000 | -4.83183400 |
| H | 4.09135100  | -1.48239900 | -5.15825800 |
| H | 3.73991100  | 0.11108500  | -4.51563200 |
| C | 5.46153500  | -0.84709800 | -3.63598800 |
| H | 5.91000100  | 0.06079500  | -3.21941800 |
| H | 6.29767800  | -1.48311300 | -3.94324800 |
| O | 3.54167200  | -1.68908100 | -2.46988700 |
| C | 4.73146100  | -1.54053700 | -2.49999400 |
| C | 5.95556600  | -0.19125100 | -0.13293500 |
| N | 5.09369400  | 0.85761900  | -0.02876100 |
| C | 5.68872500  | 1.97115600  | 0.57969400  |
| C | 6.97681300  | 1.61550400  | 0.83943300  |
| N | 7.11228100  | 0.28777500  | 0.40473900  |
| H | 8.49776600  | 0.12305200  | 3.69276900  |
| C | 1.18996100  | 0.63407200  | -1.61395300 |
| C | 1.48728000  | 0.08687300  | -0.36063100 |
| H | 0.70877200  | -0.43330100 | 0.19185500  |
| C | 2.75948500  | 0.18398400  | 0.20364600  |
| C | 4.51267500  | 2.27945600  | -2.50612800 |
| H | 4.36652200  | 3.35358100  | -2.33317400 |
| C | 3.05806600  | -0.38064900 | 1.56592400  |
| H | 3.53307100  | 0.37014500  | 2.20897300  |
| H | 10.89897000 | -1.61747500 | -1.34602700 |
| C | 10.71757800 | -1.89567500 | 0.77905500  |
| C | 9.93207800  | -1.61385400 | 1.89863600  |
| H | 10.24574600 | -1.97640800 | 2.87484400  |
| H | 1.96073900  | 1.80639500  | -3.24235100 |
| C | 8.73975800  | -0.89296000 | 1.80869800  |
| C | 8.66660600  | -0.23590600 | -1.97297300 |
| C | 3.47760300  | 1.47068800  | -1.76090100 |
| H | 8.19991300  | 0.75396000  | -1.93919000 |
| C | 8.33236200  | -0.45985200 | 0.53689800  |
| C | 9.10340200  | -0.70363600 | -0.60860800 |
| C | 10.29404300 | -1.42098100 | -0.46387900 |
| H | 2.13897400  | -0.71669900 | 2.05331500  |
| H | 3.74805100  | -1.23004300 | 1.51695000  |
| H | 4.43493100  | 2.11724900  | -3.58517200 |
| H | 5.53138600  | 2.03796200  | -2.19457200 |
| H | 7.82744100  | -1.51842000 | 3.64344200  |
| H | 6.96393500  | -0.21089400 | 2.85426400  |
| H | 9.51808600  | -0.19385100 | -2.65871100 |
| H | 7.92808500  | -0.92157200 | -2.40032200 |
| C | 2.18559900  | 1.34715200  | -2.28242100 |
| C | 7.95945300  | -0.60091900 | 3.06567100  |

|   |             |             |             |
|---|-------------|-------------|-------------|
| C | 3.75213000  | 0.84293700  | -0.53864900 |
| C | -0.17110900 | 0.43354100  | -2.23173300 |
| H | -0.96672000 | 0.50138900  | -1.48179200 |
| H | -0.37235100 | 1.17313700  | -3.01309300 |
| H | -0.24066900 | -0.56132000 | -2.69035200 |
| C | 11.98977300 | -2.69538300 | 0.91796400  |
| H | 12.68935100 | -2.21703900 | 1.61401000  |
| H | 11.78049800 | -3.69790300 | 1.31021000  |
| H | 12.49783200 | -2.81048500 | -0.04444800 |
| C | 8.10817000  | 2.39338500  | 1.41969800  |
| H | 8.37929700  | 2.04557600  | 2.42183900  |
| H | 9.00236400  | 2.30937400  | 0.79247000  |
| H | 7.83897300  | 3.45057900  | 1.49016100  |
| C | 4.93499800  | 3.22566700  | 0.86119600  |
| H | 4.61957300  | 3.73563400  | -0.05561700 |
| H | 4.03080700  | 3.01796000  | 1.44472400  |
| H | 5.55640800  | 3.91703800  | 1.43603700  |

**TS18**

|    |             |             |             |
|----|-------------|-------------|-------------|
| Cu | 5.66304400  | -2.13975800 | -0.80507200 |
| B  | 3.59163800  | -4.53911000 | -2.15793300 |
| O  | 2.41259700  | -5.14566500 | -2.52476500 |
| C  | 1.49196500  | -4.91584500 | -1.41914900 |
| C  | 2.46708300  | -4.72321300 | -0.20161700 |
| O  | 3.63466700  | -4.15503800 | -0.84864100 |
| C  | 2.92186300  | -6.03680400 | 0.43942000  |
| H  | 3.77864500  | -5.81798900 | 1.08300900  |
| H  | 2.12571300  | -6.48944400 | 1.03982000  |
| H  | 3.23516000  | -6.75989300 | -0.32130500 |
| C  | 1.97635900  | -3.75317800 | 0.86288200  |
| H  | 1.04246800  | -4.11437700 | 1.30973100  |
| H  | 2.73504300  | -3.66276400 | 1.64409300  |
| H  | 1.80780100  | -2.76309700 | 0.43805500  |
| C  | 0.55746500  | -6.11249100 | -1.30963600 |
| H  | -0.10383700 | -6.00410800 | -0.44270600 |
| H  | -0.06436700 | -6.18160500 | -2.20789800 |
| H  | 1.11491900  | -7.04600900 | -1.20877300 |
| C  | 0.70917700  | -3.64165200 | -1.75831300 |
| H  | 0.20594200  | -3.78235200 | -2.72066600 |
| H  | -0.05134600 | -3.42602300 | -1.00081900 |
| H  | 1.37960300  | -2.78114800 | -1.83871800 |
| C  | 5.88596700  | -3.70317200 | -2.50847300 |
| H  | 6.43557500  | -3.23041100 | -3.31553500 |
| C  | 6.82919100  | -4.48281700 | -1.67031200 |

|   |             |             |             |
|---|-------------|-------------|-------------|
| C | 8.13648500  | -3.98791700 | -1.50609400 |
| C | 9.07244000  | -4.68367200 | -0.75144800 |
| C | 8.72671500  | -5.89893500 | -0.15686200 |
| C | 7.43839000  | -6.40696800 | -0.32892400 |
| C | 6.49527100  | -5.70769000 | -1.07542600 |
| H | 8.40977900  | -3.04076300 | -1.96371200 |
| H | 10.07066000 | -4.27613400 | -0.62908600 |
| H | 9.45477000  | -6.44439700 | 0.43673700  |
| H | 7.15994900  | -7.34982300 | 0.13319400  |
| H | 5.49651300  | -6.10660300 | -1.19407600 |
| N | 4.71607000  | -4.33881900 | -3.02695000 |
| C | 4.58721100  | -4.32993400 | -4.44130900 |
| C | 5.70245000  | -4.63464300 | -5.23888000 |
| C | 3.38795800  | -3.95585000 | -5.06745100 |
| C | 5.62749700  | -4.53989300 | -6.62718600 |
| H | 6.62236400  | -4.95993900 | -4.76270900 |
| C | 3.31687400  | -3.88262800 | -6.45709700 |
| H | 2.52670900  | -3.70969200 | -4.46190800 |
| C | 4.43505500  | -4.16016500 | -7.24642500 |
| H | 6.50239800  | -4.77799500 | -7.22596800 |
| H | 2.38242300  | -3.58400500 | -6.92448300 |
| H | 4.37535900  | -4.09099400 | -8.32867400 |
| I | 5.87783900  | -3.31210600 | 1.64746700  |
| C | 5.12066200  | 0.21786600  | -7.29309000 |
| H | 4.93871500  | -0.78796300 | -7.68971200 |
| H | 5.72675700  | 0.76739100  | -8.02204100 |
| H | 4.15015000  | 0.72295300  | -7.21381400 |
| C | 5.81188800  | 0.13904300  | -5.92924900 |
| H | 6.79159800  | -0.34587100 | -6.04427300 |
| H | 6.01431500  | 1.15173900  | -5.55096000 |
| C | 4.98080600  | -0.64277500 | -4.91031500 |
| H | 4.74996500  | -1.63324800 | -5.31533400 |
| H | 4.01484000  | -0.15156100 | -4.74359400 |
| C | 5.69552400  | -0.80629700 | -3.56653800 |
| H | 5.87441500  | 0.16107700  | -3.08889400 |
| H | 6.67985500  | -1.26098500 | -3.70626000 |
| O | 3.69493000  | -1.75846400 | -2.65041300 |
| C | 4.89148300  | -1.64734800 | -2.58354900 |
| C | 5.98519300  | -0.20618100 | -0.18409700 |
| N | 5.10935800  | 0.83828000  | -0.13984700 |
| C | 5.67053100  | 1.97217300  | 0.46398600  |
| C | 6.95041200  | 1.63462500  | 0.78251100  |
| N | 7.11441400  | 0.29922800  | 0.38658400  |
| H | 8.12224700  | 0.25125600  | 3.66251500  |

|   |             |             |             |
|---|-------------|-------------|-------------|
| C | 1.17993900  | 0.44851200  | -1.63320100 |
| C | 1.52720300  | -0.06107300 | -0.37673000 |
| H | 0.77964100  | -0.59113100 | 0.20796200  |
| C | 2.80856900  | 0.09246500  | 0.15275200  |
| C | 4.39783300  | 2.22764800  | -2.62971900 |
| H | 4.11022500  | 3.28519700  | -2.56991300 |
| C | 3.15481800  | -0.42088600 | 1.52483800  |
| H | 3.64867300  | 0.35453200  | 2.12277000  |
| H | 11.05782700 | -1.53863600 | -1.05868700 |
| C | 10.67917000 | -1.88110500 | 1.03317800  |
| C | 9.80124700  | -1.62033800 | 2.08597800  |
| H | 10.02840500 | -2.00470100 | 3.07725400  |
| H | 1.86519800  | 1.62421800  | -3.29634900 |
| C | 8.61863100  | -0.89731700 | 1.90712000  |
| C | 8.89458800  | -0.09769600 | -1.83108900 |
| C | 3.42872500  | 1.37266600  | -1.84801700 |
| H | 8.60524100  | 0.95898200  | -1.79177100 |
| C | 8.32609300  | -0.44044700 | 0.61432800  |
| C | 9.20114800  | -0.64647900 | -0.46181100 |
| C | 10.37248000 | -1.36956700 | -0.23126400 |
| H | 2.25272400  | -0.73813800 | 2.05473300  |
| H | 3.84244300  | -1.27306300 | 1.48758200  |
| H | 4.39458500  | 1.95705200  | -3.69014800 |
| H | 5.42128100  | 2.14594600  | -2.25730100 |
| H | 7.71140700  | -1.46982300 | 3.76298800  |
| H | 6.70684400  | -0.40066000 | 2.80136500  |
| H | 9.76278800  | -0.19082000 | -2.48979900 |
| H | 8.06106300  | -0.63336800 | -2.29143300 |
| C | 2.13097500  | 1.18744000  | -2.33631500 |
| C | 7.73614700  | -0.60697500 | 3.09436100  |
| C | 3.76020300  | 0.77104100  | -0.62731500 |
| C | -0.18754200 | 0.18896300  | -2.21364900 |
| H | -0.96379700 | 0.21592500  | -1.44126400 |
| H | -0.44443100 | 0.92302400  | -2.98391900 |
| H | -0.22487200 | -0.80530200 | -2.67713900 |
| C | 11.91368500 | -2.72003300 | 1.25144700  |
| H | 12.36354400 | -2.52600800 | 2.23093100  |
| H | 11.66548700 | -3.78892200 | 1.21574400  |
| H | 12.67056200 | -2.53111000 | 0.48321900  |
| C | 8.05329100  | 2.43200600  | 1.39021000  |
| H | 8.31480300  | 2.07711500  | 2.39239200  |
| H | 8.96089900  | 2.37618100  | 0.77888600  |
| H | 7.75909900  | 3.48190200  | 1.46827600  |
| C | 4.89538100  | 3.22551800  | 0.68725800  |

|   |            |            |             |
|---|------------|------------|-------------|
| H | 4.63240700 | 3.72447700 | -0.25203600 |
| H | 3.95958100 | 3.01817900 | 1.21848200  |
| H | 5.47888700 | 3.92600800 | 1.29012100  |

**IM26**

|    |             |             |             |
|----|-------------|-------------|-------------|
| Cu | 5.49171000  | -2.34673600 | 0.69866300  |
| B  | 3.68540200  | -3.92689200 | -2.69912600 |
| O  | 2.45064300  | -4.42668600 | -3.05755900 |
| C  | 1.58585700  | -4.26122300 | -1.91025400 |
| C  | 2.60898300  | -4.20826300 | -0.72311500 |
| O  | 3.78338400  | -3.60030500 | -1.36289700 |
| C  | 3.04643800  | -5.59062200 | -0.23658100 |
| H  | 3.90844500  | -5.47331800 | 0.42445400  |
| H  | 2.24682500  | -6.08466800 | 0.32450600  |
| H  | 3.33271900  | -6.23255100 | -1.07631000 |
| C  | 2.15763200  | -3.33878000 | 0.43726900  |
| H  | 1.20424600  | -3.70904500 | 0.83318100  |
| H  | 2.89008500  | -3.37199800 | 1.24586200  |
| H  | 2.02622000  | -2.30454500 | 0.12608100  |
| C  | 0.61267400  | -5.43250300 | -1.85672600 |
| H  | 0.00158900  | -5.38362000 | -0.94863200 |
| H  | -0.05678800 | -5.39730200 | -2.72224100 |
| H  | 1.13924500  | -6.38879600 | -1.87225600 |
| C  | 0.83041400  | -2.94537200 | -2.11818200 |
| H  | 0.30314100  | -2.99076600 | -3.07629200 |
| H  | 0.10064200  | -2.76159300 | -1.32389500 |
| H  | 1.52462200  | -2.10208300 | -2.14406300 |
| C  | 6.11353300  | -3.53573700 | -3.47993800 |
| H  | 6.66304900  | -4.05714600 | -4.27451600 |
| C  | 6.66627700  | -4.06370200 | -2.16661600 |
| C  | 7.37863800  | -3.25661700 | -1.27389600 |
| C  | 7.94893100  | -3.80720300 | -0.12158600 |
| C  | 7.79580100  | -5.16513400 | 0.15291000  |
| C  | 7.07790200  | -5.97277700 | -0.72977600 |
| C  | 6.52304400  | -5.42652800 | -1.88463100 |
| H  | 7.50251100  | -2.20027600 | -1.47016200 |
| H  | 8.49105200  | -3.16910300 | 0.56613400  |
| H  | 8.20395900  | -5.58176800 | 1.06718100  |
| H  | 6.94230200  | -7.02842000 | -0.51324900 |
| H  | 5.96048400  | -6.05414500 | -2.57040400 |
| N  | 4.70175800  | -3.83902600 | -3.69355900 |
| C  | 4.31693000  | -3.81955900 | -5.07122700 |
| C  | 4.77467300  | -4.81173200 | -5.94508400 |
| C  | 3.54362900  | -2.76670600 | -5.57144900 |

|   |             |             |             |
|---|-------------|-------------|-------------|
| C | 4.47920500  | -4.74165800 | -7.30646300 |
| H | 5.36090300  | -5.63615600 | -5.54853300 |
| C | 3.23649200  | -2.70572600 | -6.93040700 |
| H | 3.20481900  | -1.99628700 | -4.88639800 |
| C | 3.71142500  | -3.68616900 | -7.80378300 |
| H | 4.83993600  | -5.51680000 | -7.97688600 |
| H | 2.63659700  | -1.88320900 | -7.30999900 |
| H | 3.48056200  | -3.63180500 | -8.86371100 |
| I | 5.37973700  | -3.97462800 | 2.71548100  |
| C | 7.63511600  | -1.57670000 | -8.54060100 |
| H | 7.21781800  | -2.56995200 | -8.74484000 |
| H | 8.43524000  | -1.38908800 | -9.26514800 |
| H | 6.83944200  | -0.84392100 | -8.72017600 |
| C | 8.14875300  | -1.48572900 | -7.10102800 |
| H | 8.97525800  | -2.19544500 | -6.95652100 |
| H | 8.56495600  | -0.48591400 | -6.91538800 |
| C | 7.04571800  | -1.78148600 | -6.08200800 |
| H | 6.63557100  | -2.77886100 | -6.27744200 |
| H | 6.21263200  | -1.08116000 | -6.21862600 |
| C | 7.53195600  | -1.68705200 | -4.61930600 |
| H | 7.87062500  | -0.66971600 | -4.40671900 |
| H | 8.36899100  | -2.38028400 | -4.46121700 |
| O | 5.68371900  | -1.17829500 | -3.18527300 |
| C | 6.39175300  | -2.03327900 | -3.68576700 |
| C | 5.63147700  | -0.40907000 | 0.46840400  |
| N | 4.63785000  | 0.52011800  | 0.47939700  |
| C | 5.13301700  | 1.82659300  | 0.60674900  |
| C | 6.48816000  | 1.71319900  | 0.67021700  |
| N | 6.76569000  | 0.34281800  | 0.57454200  |
| H | 7.03777900  | 0.36228600  | 3.19543900  |
| C | 0.47205600  | -0.10939300 | 0.67592100  |
| C | 1.26260700  | -0.19262300 | 1.82546300  |
| H | 0.79255500  | -0.39860600 | 2.78387400  |
| C | 2.64905100  | -0.02099200 | 1.77917300  |
| C | 3.14945800  | 0.52397000  | -1.98219300 |
| H | 3.76211300  | 1.43310300  | -1.99467500 |
| C | 3.48775900  | -0.13289500 | 3.02609700  |
| H | 4.22241300  | 0.67695100  | 3.09659900  |
| H | 10.85409500 | -0.87009000 | -1.11312500 |
| C | 10.62094900 | -1.33302000 | 0.97578800  |
| C | 9.76283000  | -1.23927600 | 2.07523100  |
| H | 10.08967200 | -1.61515600 | 3.04151800  |
| H | 0.49353300  | 0.20765300  | -1.45160500 |
| C | 8.48579100  | -0.67881500 | 1.96990200  |

|   |             |             |             |
|---|-------------|-------------|-------------|
| C | 8.50043400  | 0.33418300  | -1.73164200 |
| C | 2.48011400  | 0.31079100  | -0.64995100 |
| H | 8.60143200  | 1.42716400  | -1.73912000 |
| C | 8.08054000  | -0.21277800 | 0.70993900  |
| C | 8.92799600  | -0.24441500 | -0.40639300 |
| C | 10.19170400 | -0.81915800 | -0.25214100 |
| H | 2.85723600  | -0.10620900 | 3.91921300  |
| H | 4.04533000  | -1.07788200 | 3.03485800  |
| H | 2.40376400  | 0.60796700  | -2.77860800 |
| H | 3.82251300  | -0.30608700 | -2.21921400 |
| H | 8.15552700  | -0.68729700 | 4.09355100  |
| H | 6.83352700  | -1.39247000 | 3.15301100  |
| H | 9.13059700  | -0.05334700 | -2.53692800 |
| H | 7.45694000  | 0.10775900  | -1.96666800 |
| C | 1.09593800  | 0.14748200  | -0.54879200 |
| C | 7.57940400  | -0.58926200 | 3.16909200  |
| C | 3.23239500  | 0.23369200  | 0.52944000  |
| C | -1.01678000 | -0.34325900 | 0.74496300  |
| H | -1.42593600 | -0.04555000 | 1.71582900  |
| H | -1.54700500 | 0.21130300  | -0.03618600 |
| H | -1.25030300 | -1.40727600 | 0.60553400  |
| C | 11.96876800 | -1.99939700 | 1.10189200  |
| H | 12.33843500 | -1.96325800 | 2.13147600  |
| H | 11.90826600 | -3.05642800 | 0.81189500  |
| H | 12.71327400 | -1.52588000 | 0.45315700  |
| C | 7.55699100  | 2.73549900  | 0.85383300  |
| H | 8.18828700  | 2.49571900  | 1.71698000  |
| H | 8.21533100  | 2.80594500  | -0.01937000 |
| H | 7.11286900  | 3.72043900  | 1.01957700  |
| C | 4.23505600  | 3.01396700  | 0.67422800  |
| H | 3.64652700  | 3.12930600  | -0.24331900 |
| H | 3.52447000  | 2.92960200  | 1.50431400  |
| H | 4.82235000  | 3.92475200  | 0.81691300  |
